# Supplementary material for: Cobalt-catalyzed difluoroalkylation of tertiary aryl ketones for facile synthesis of quaternary alkyl difluorides
Source: PubMed Central journal article supplement (PMC6251884; doi:10.1038/s41467-018-07525-y), 2018-11-23
Supplement: 41467_2018_7525_MOESM1_ESM.pdf [file 41467_2018_7525_MOESM1_ESM.pdf]

**Cobalt-Catalyzed Difluoroalkylation of Tertiary Aryl Ketones for Facile Synthesis of Quaternary  
Alkyl Difluorides**

*Li et al.*

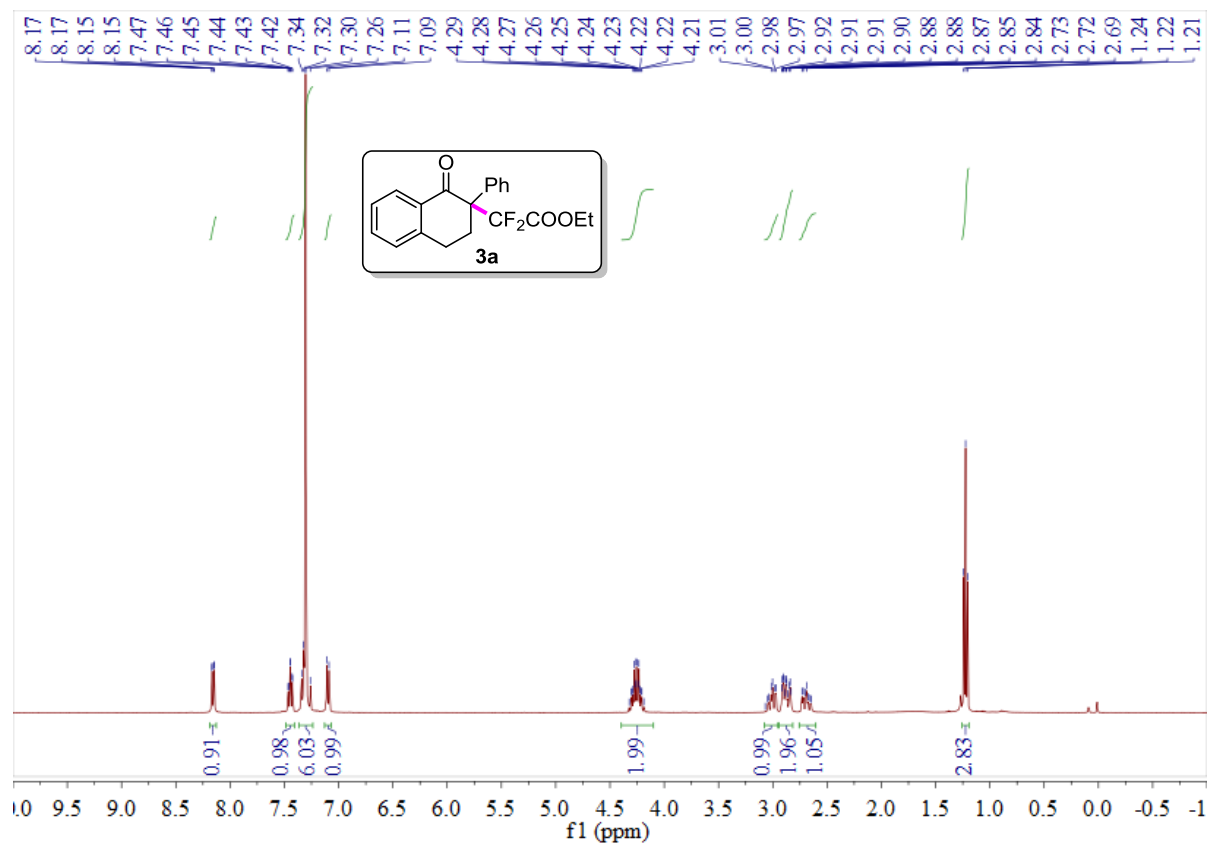

Supplementary Figure 1.  $^1\text{H}$  NMR of 3a

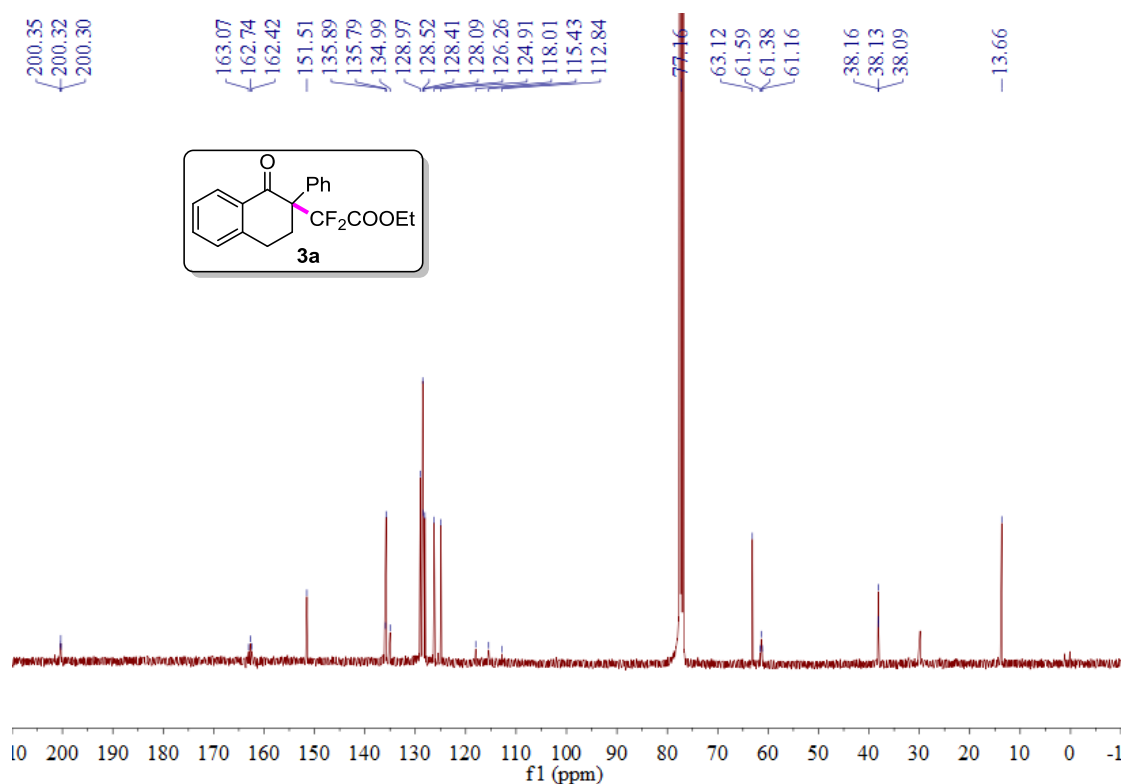

Supplementary Figure 2.  $^{13}\text{C}$  NMR of 3a

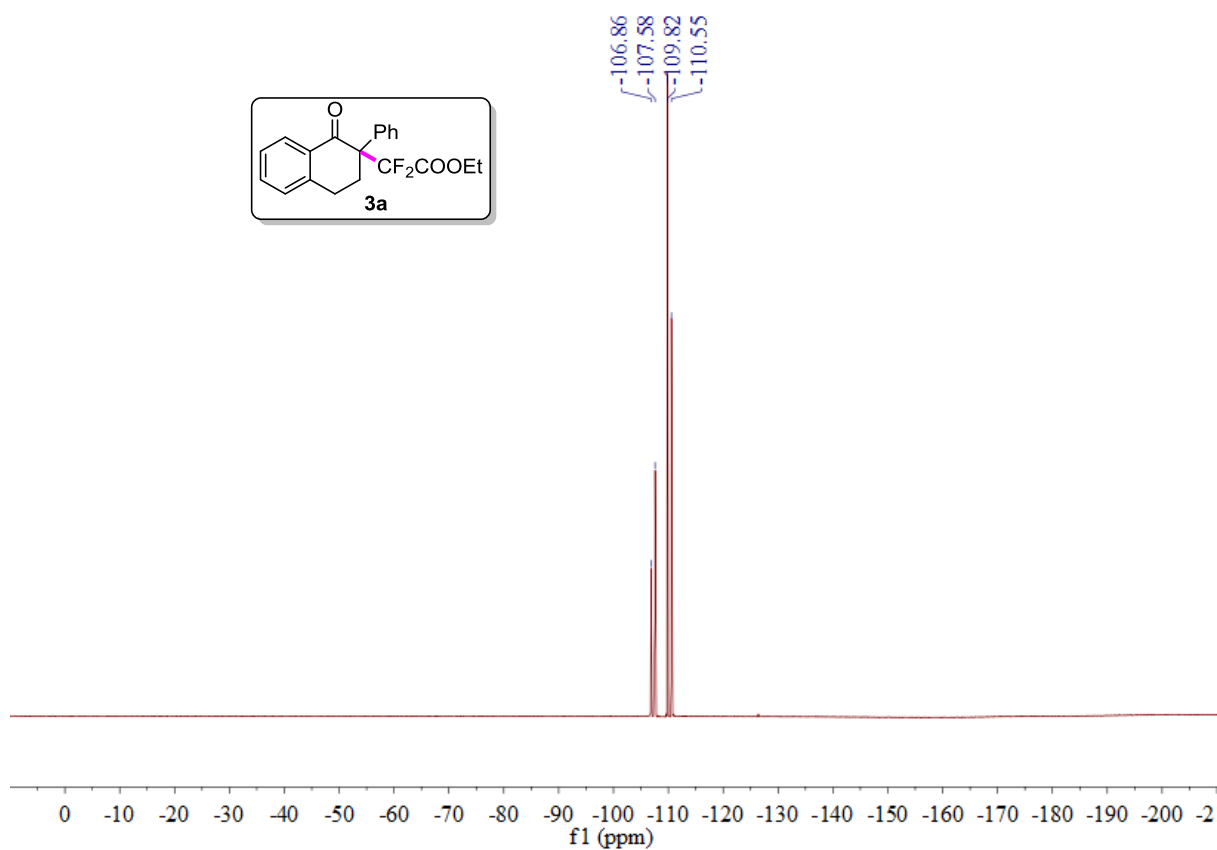

Supplementary Figure 3.  $^{19}\text{F}$  NMR of **3a**

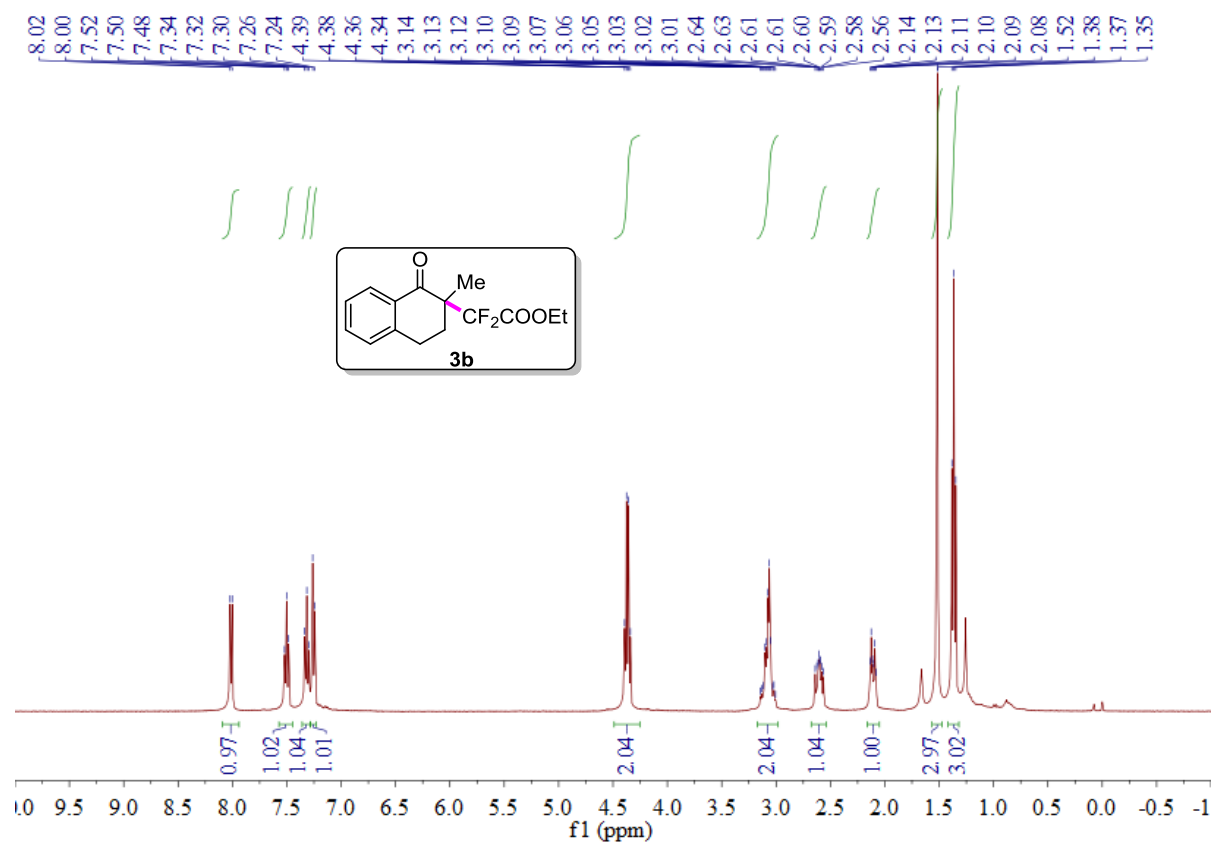

Supplementary Figure 4.  $^1\text{H}$  NMR of **3b**

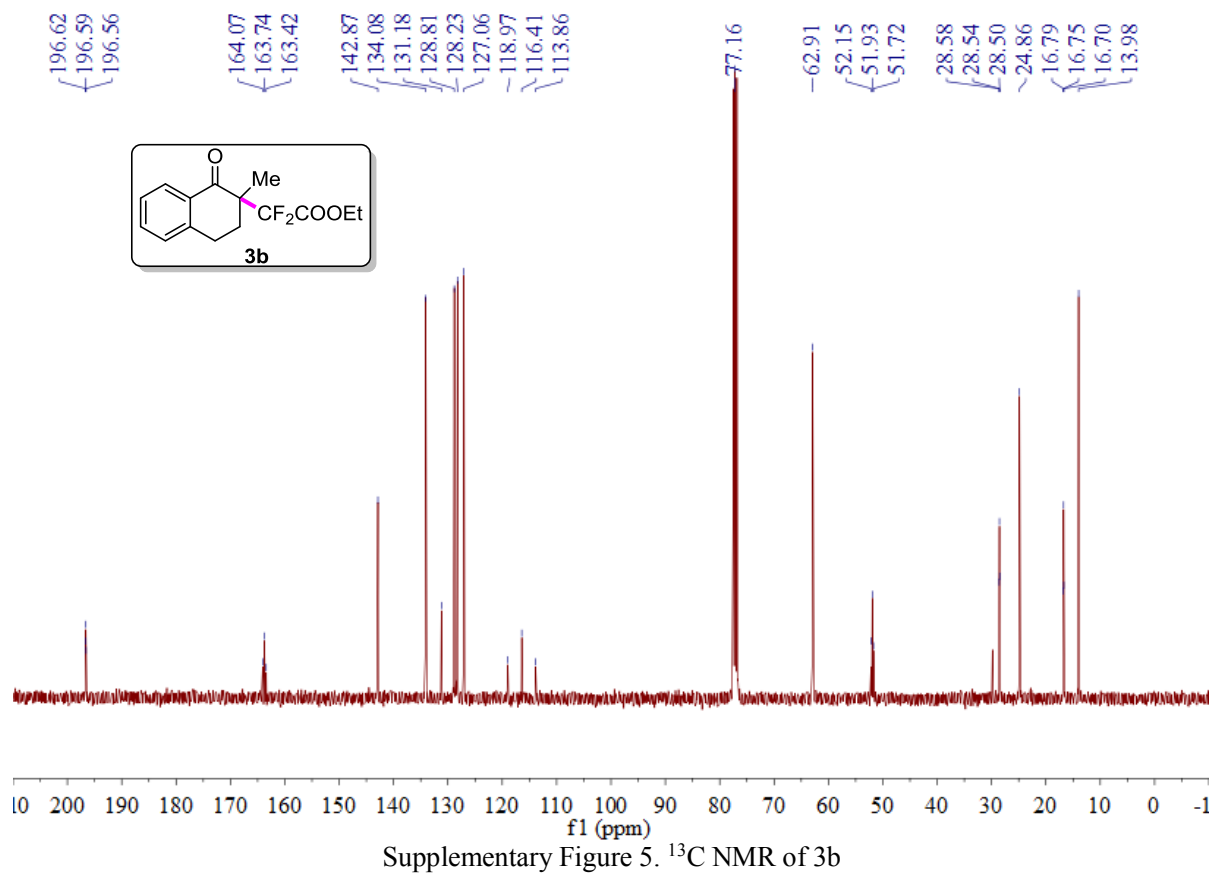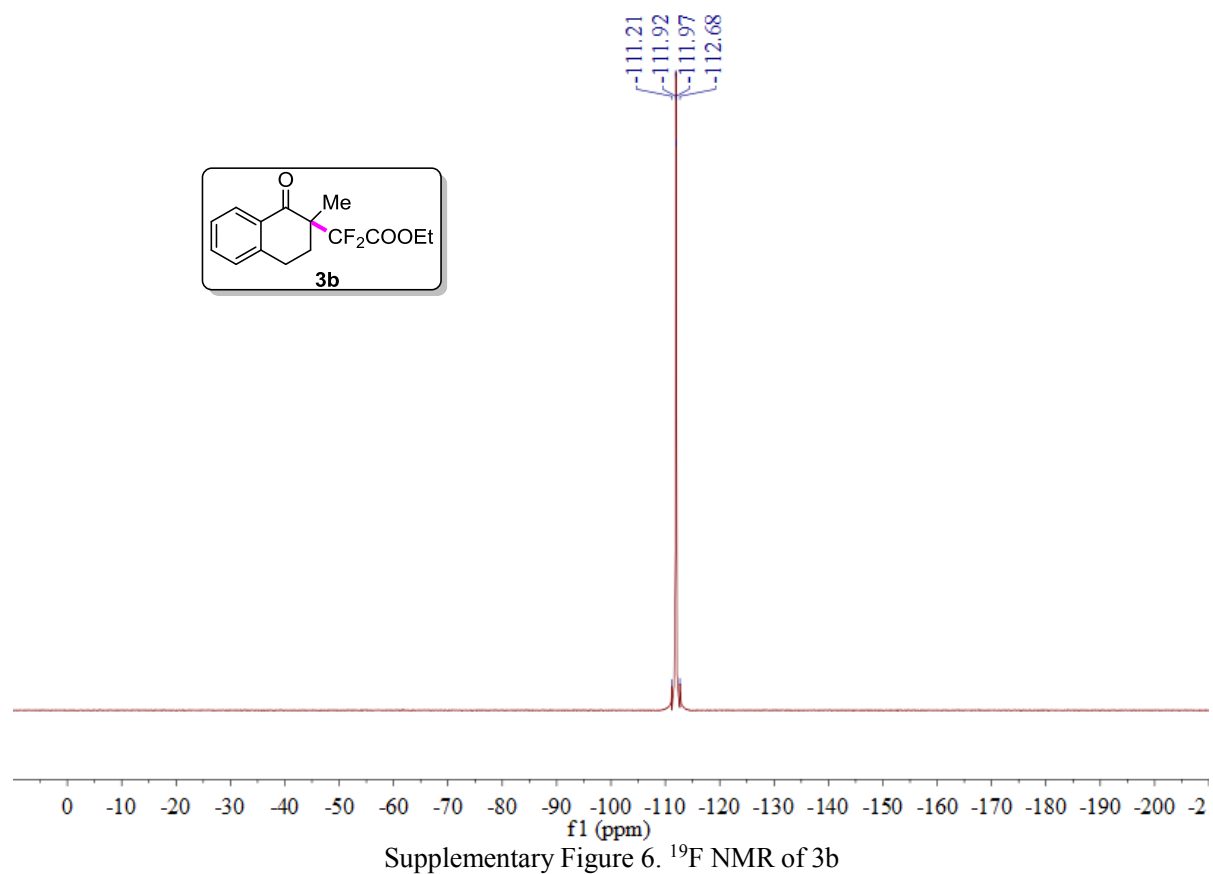

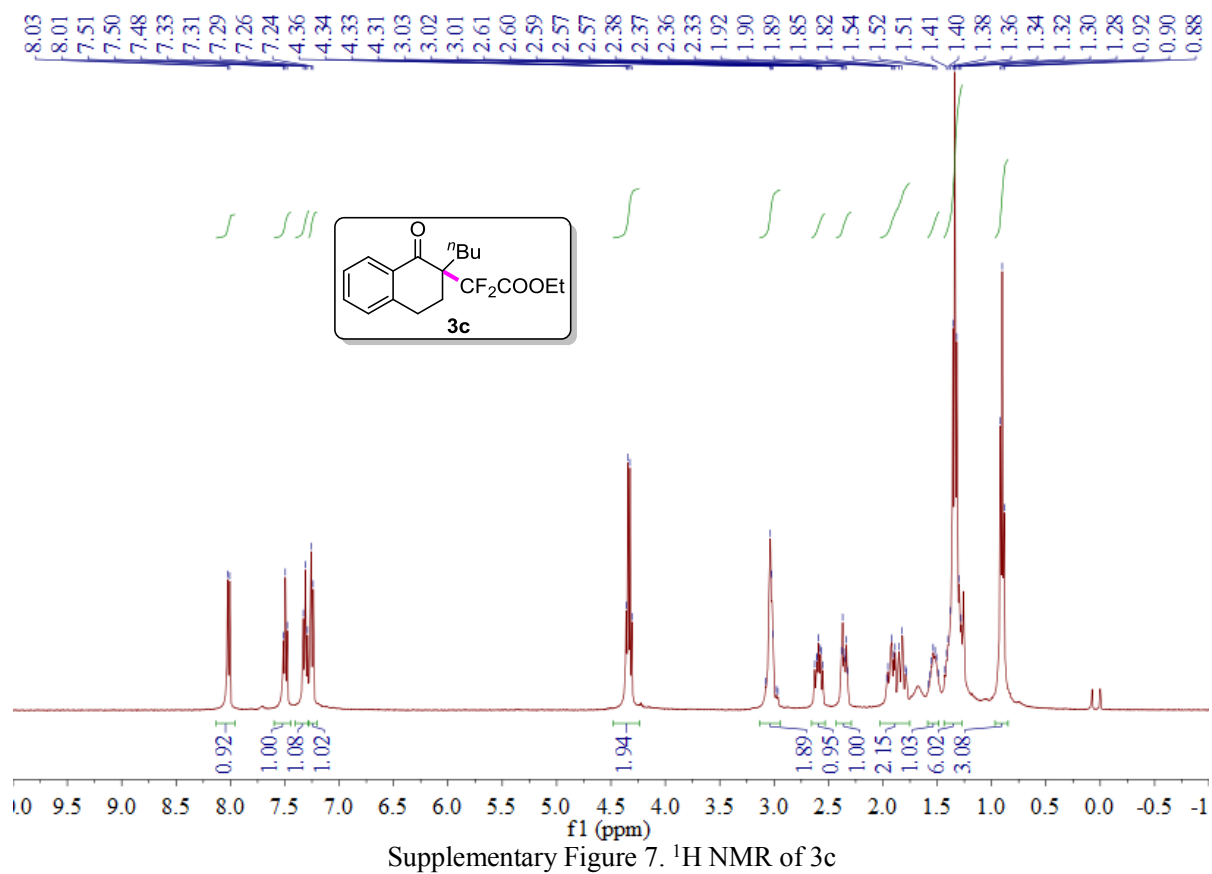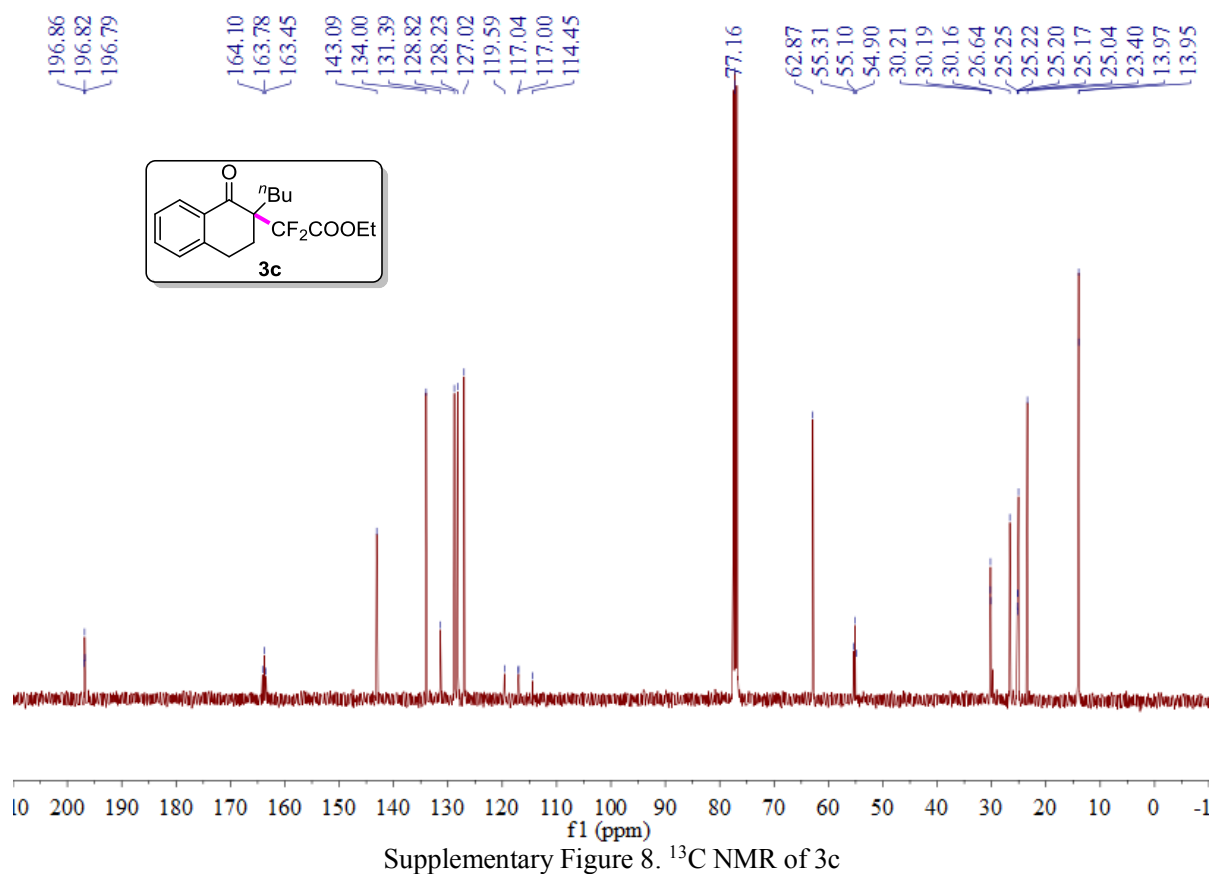

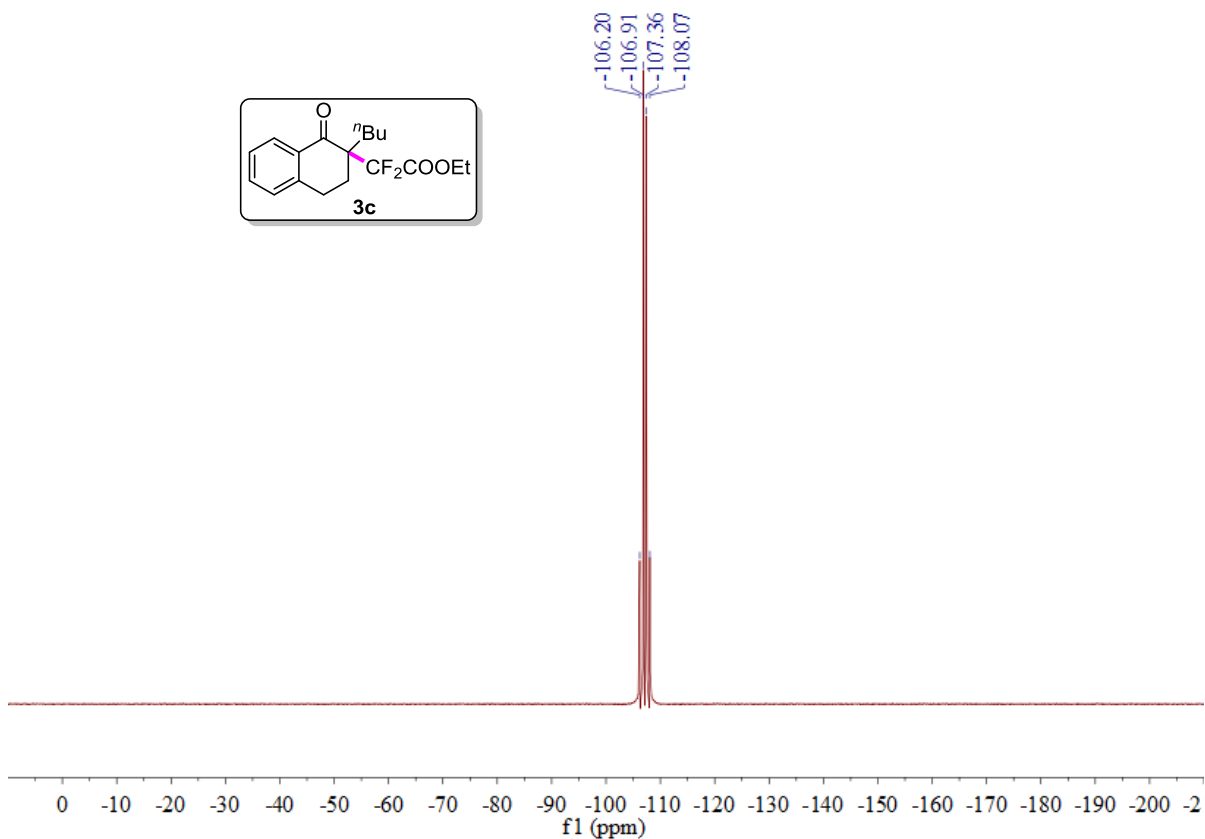

Supplementary Figure 9.  $^{19}\text{F}$  NMR of **3c**

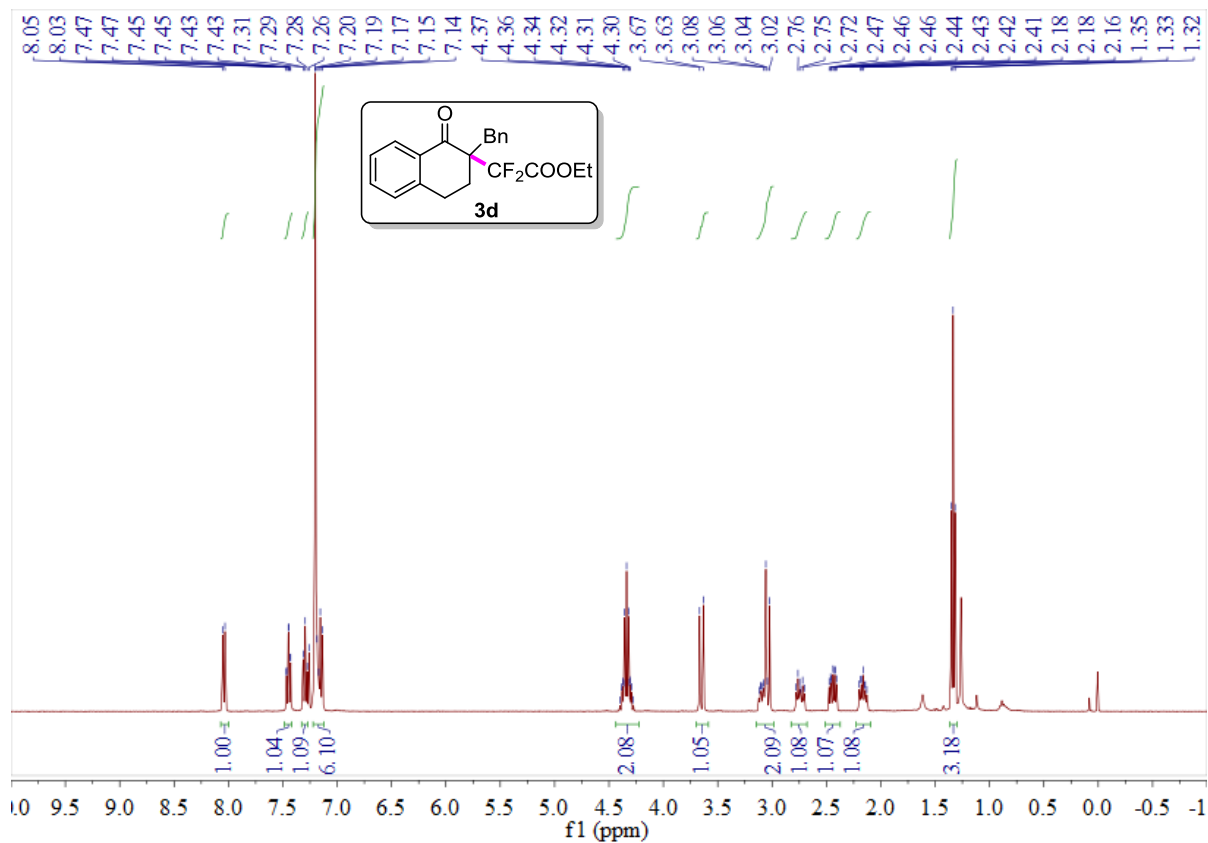

Supplementary Figure 10.  $^1\text{H}$  NMR of **3d**

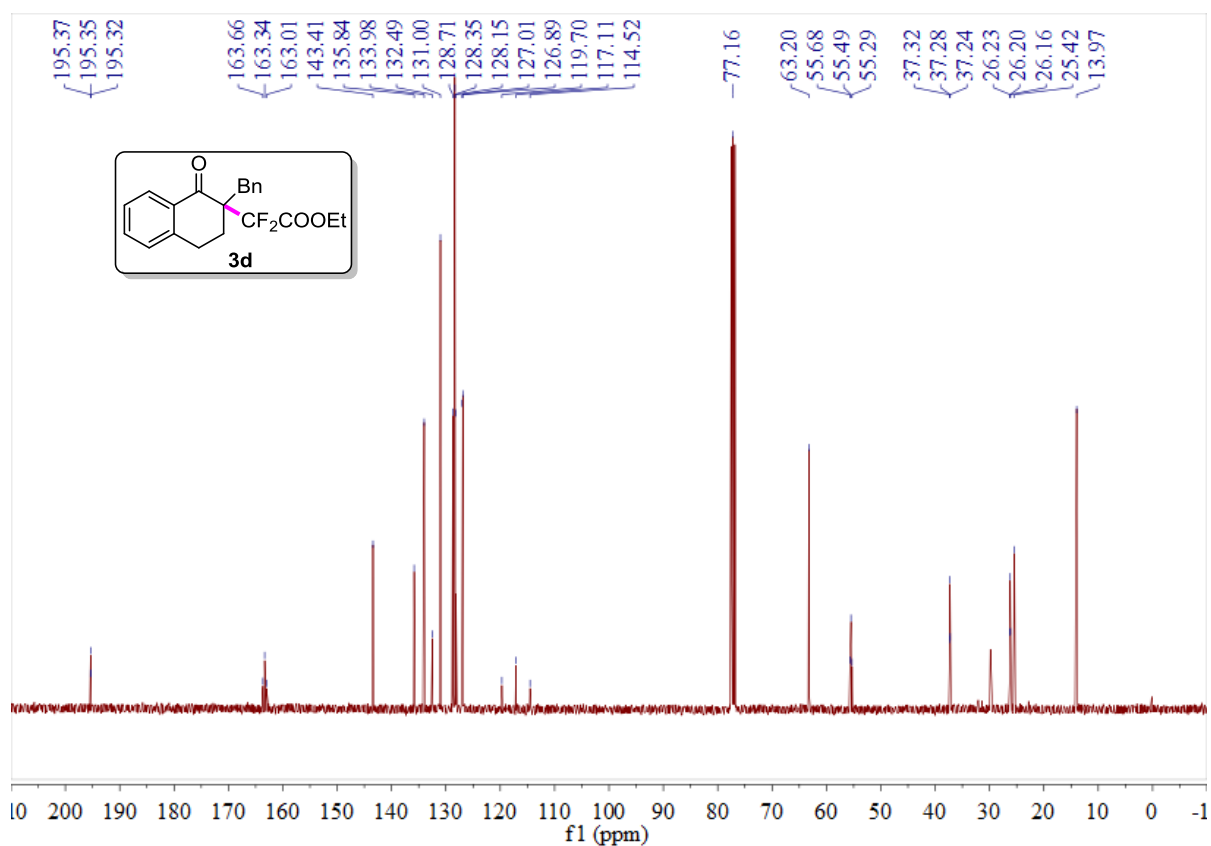

Supplementary Figure 11.  $^{13}\text{C}$  NMR of **3d**

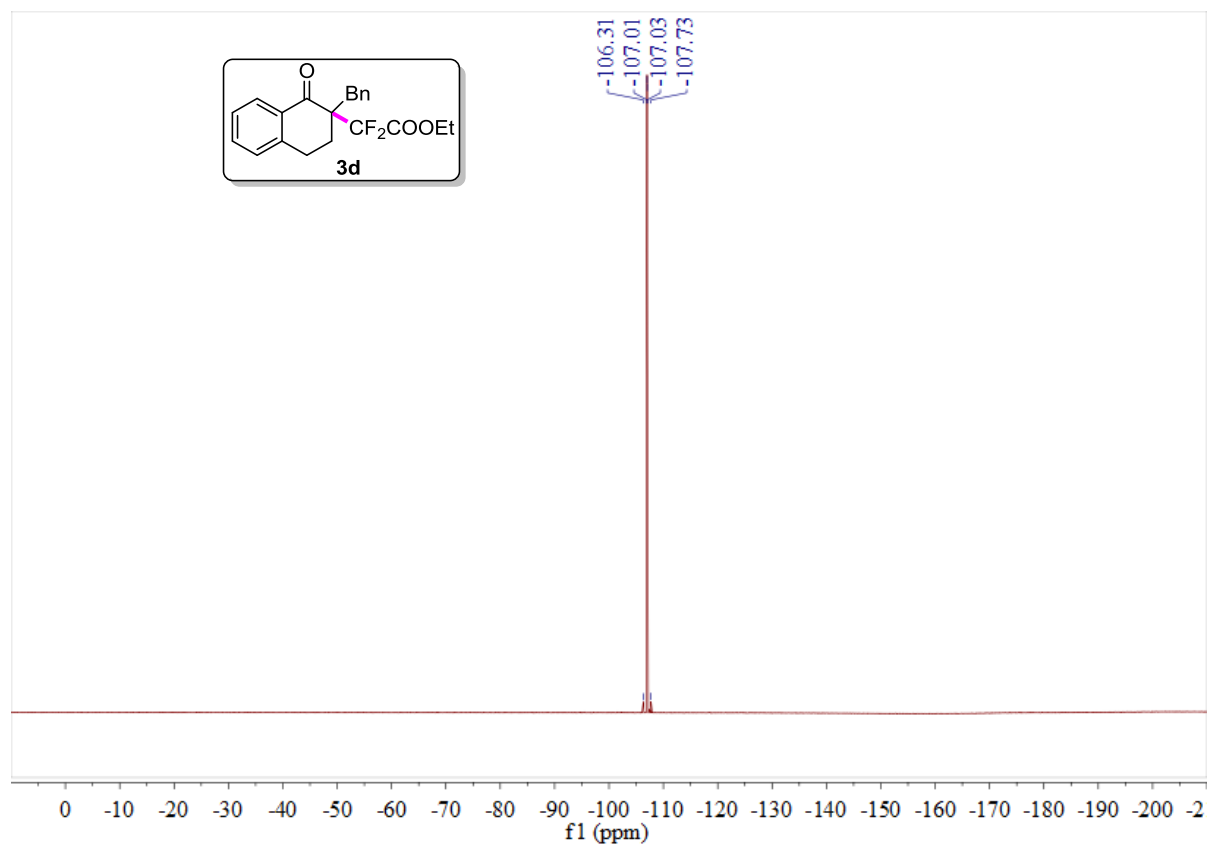

Supplementary Figure 12.  $^{19}\text{F}$  NMR of **3d**

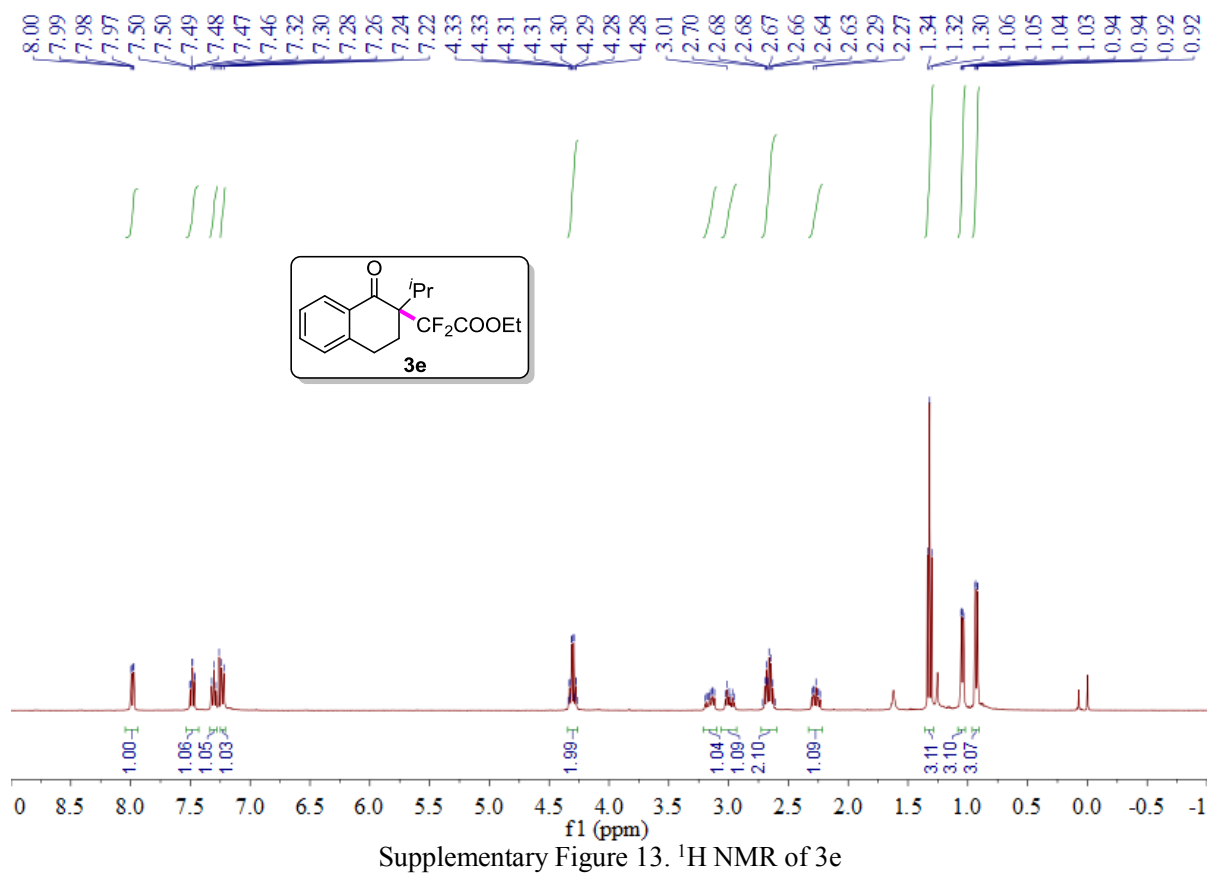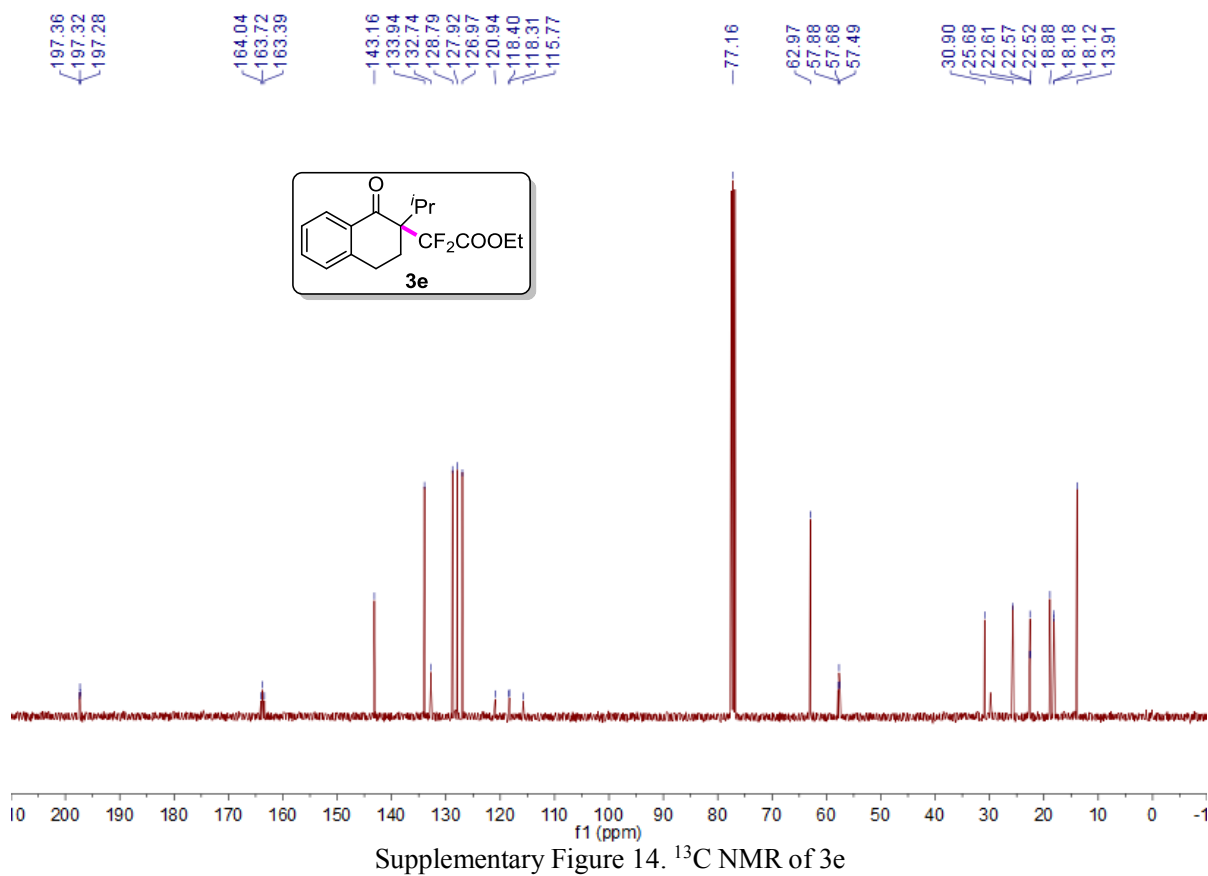



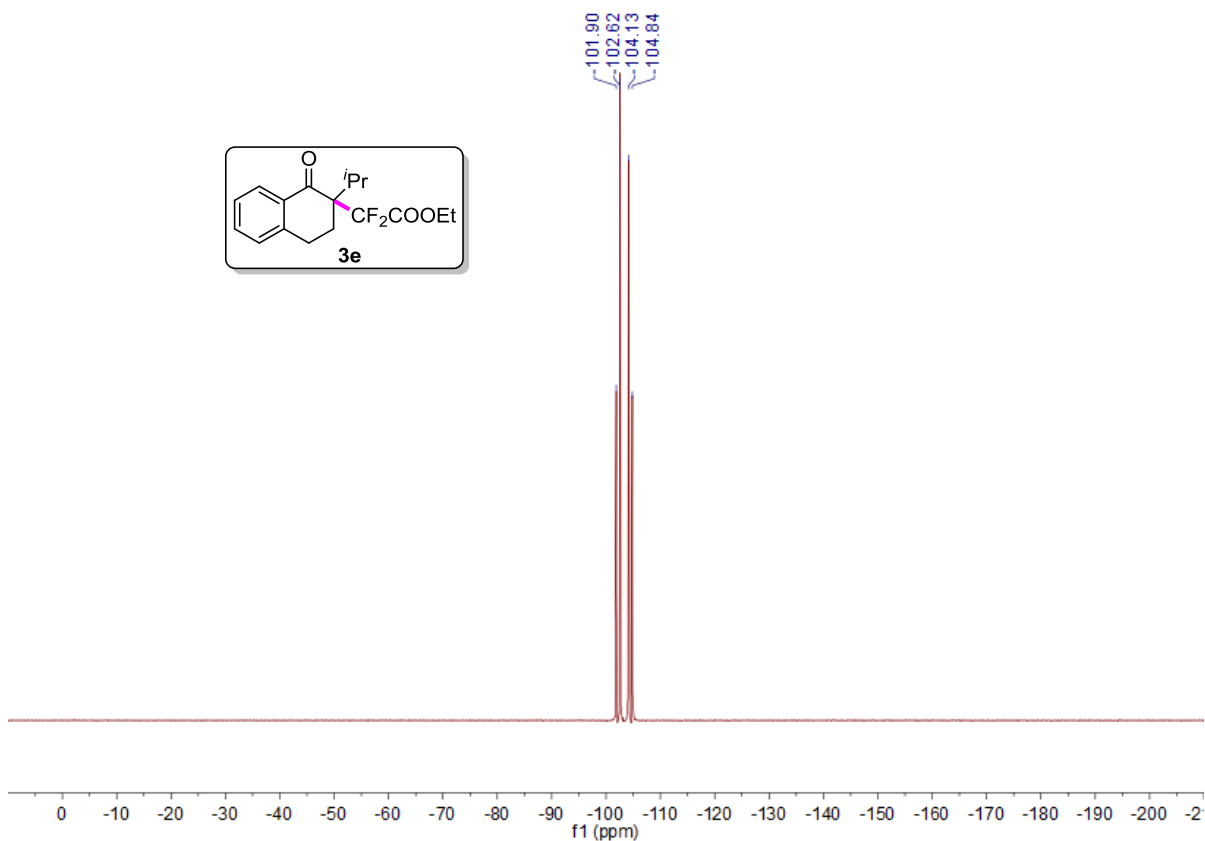

Supplementary Figure 15.  $^{19}\text{F}$  NMR of **3e**

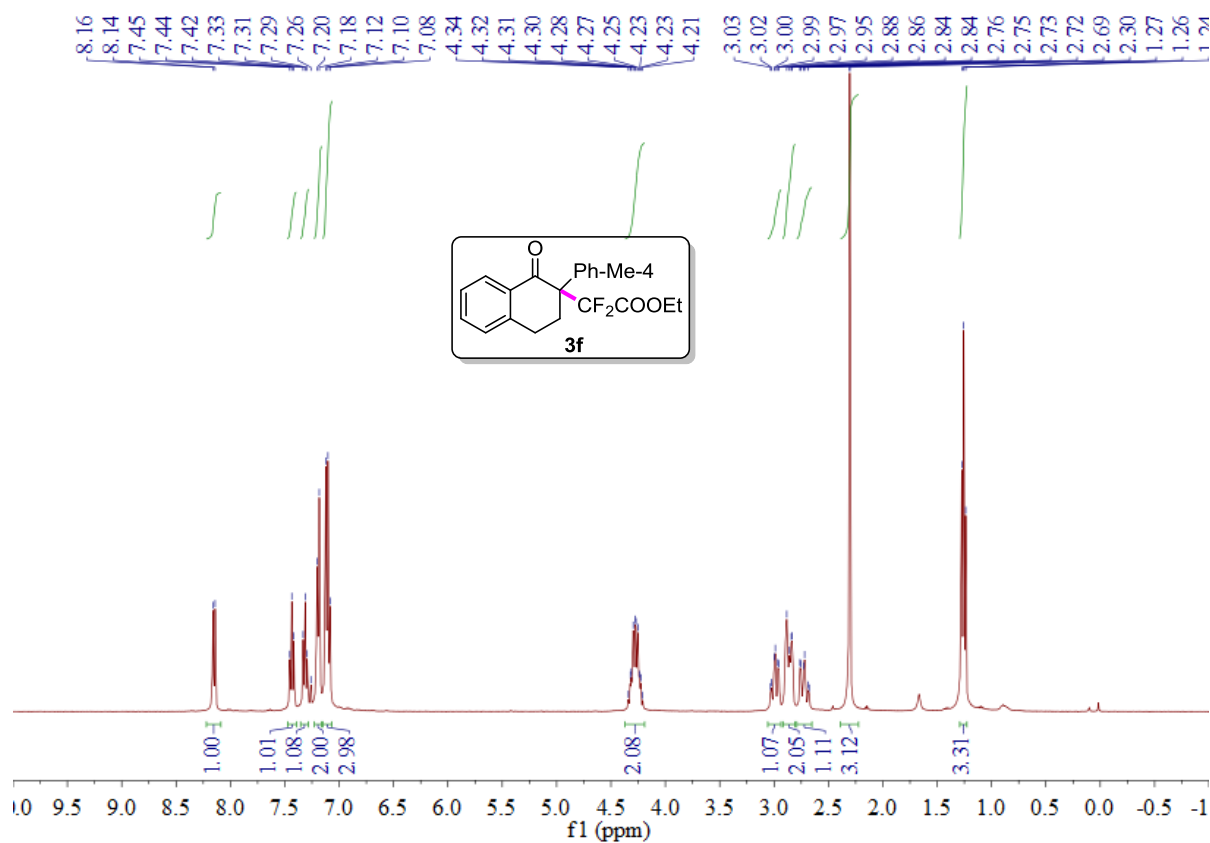

Supplementary Figure 16.  $^1\text{H}$  NMR of **3f**

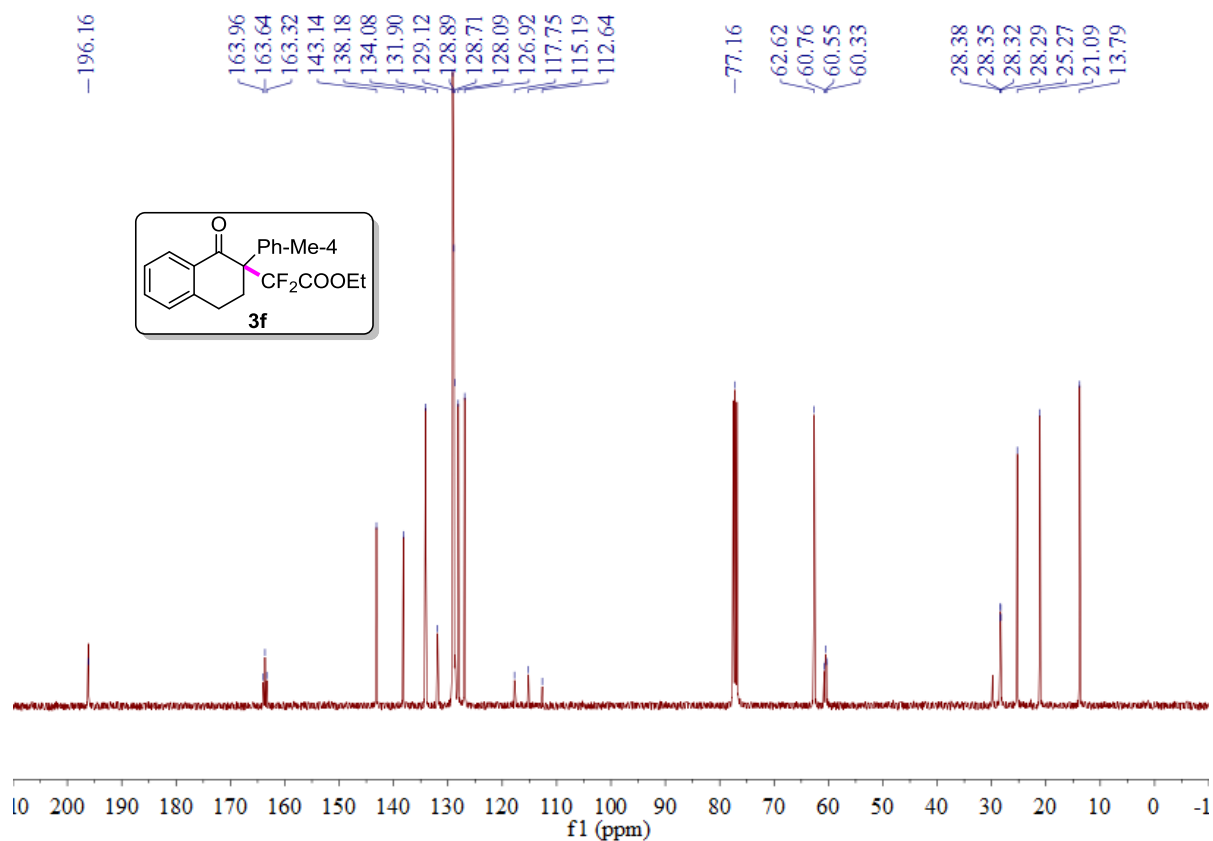

Supplementary Figure 17. <sup>13</sup>C NMR of **3f**

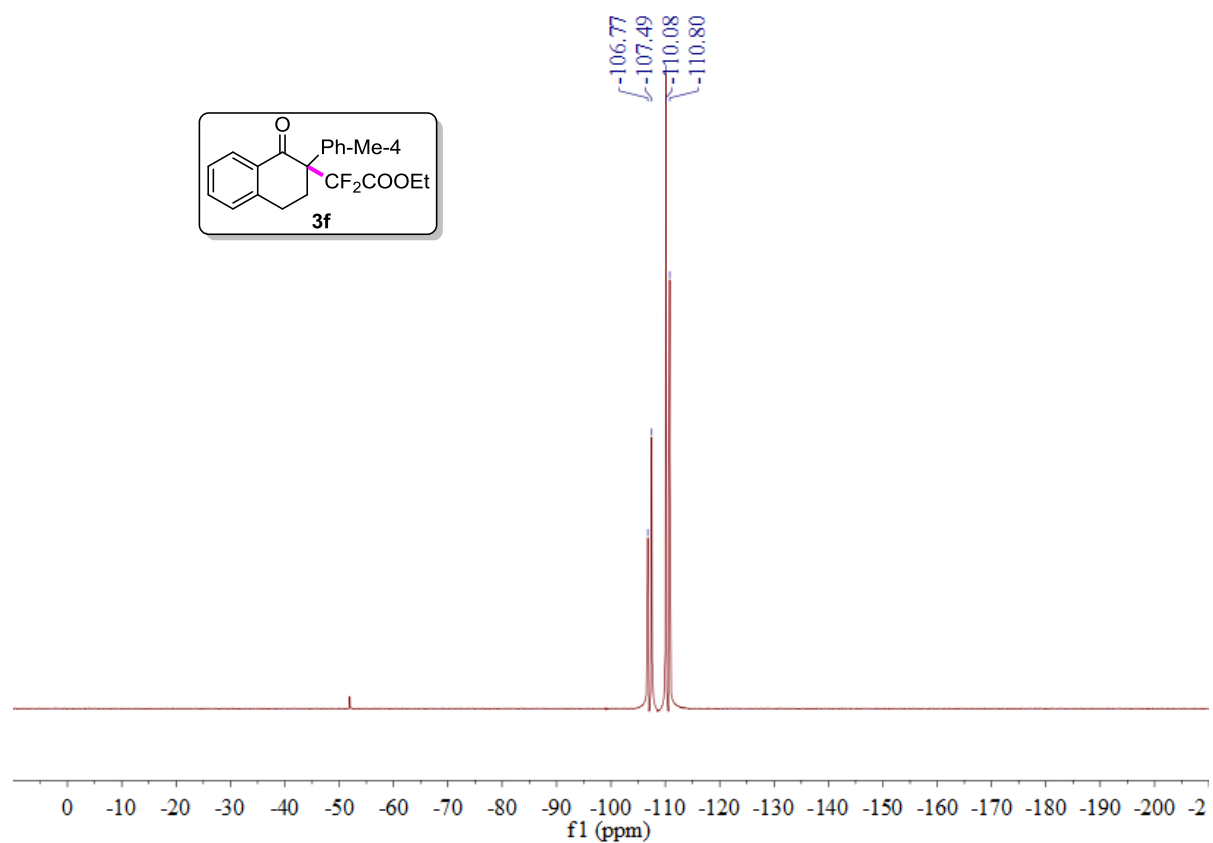

Supplementary Figure 18. <sup>19</sup>F NMR of **3f**

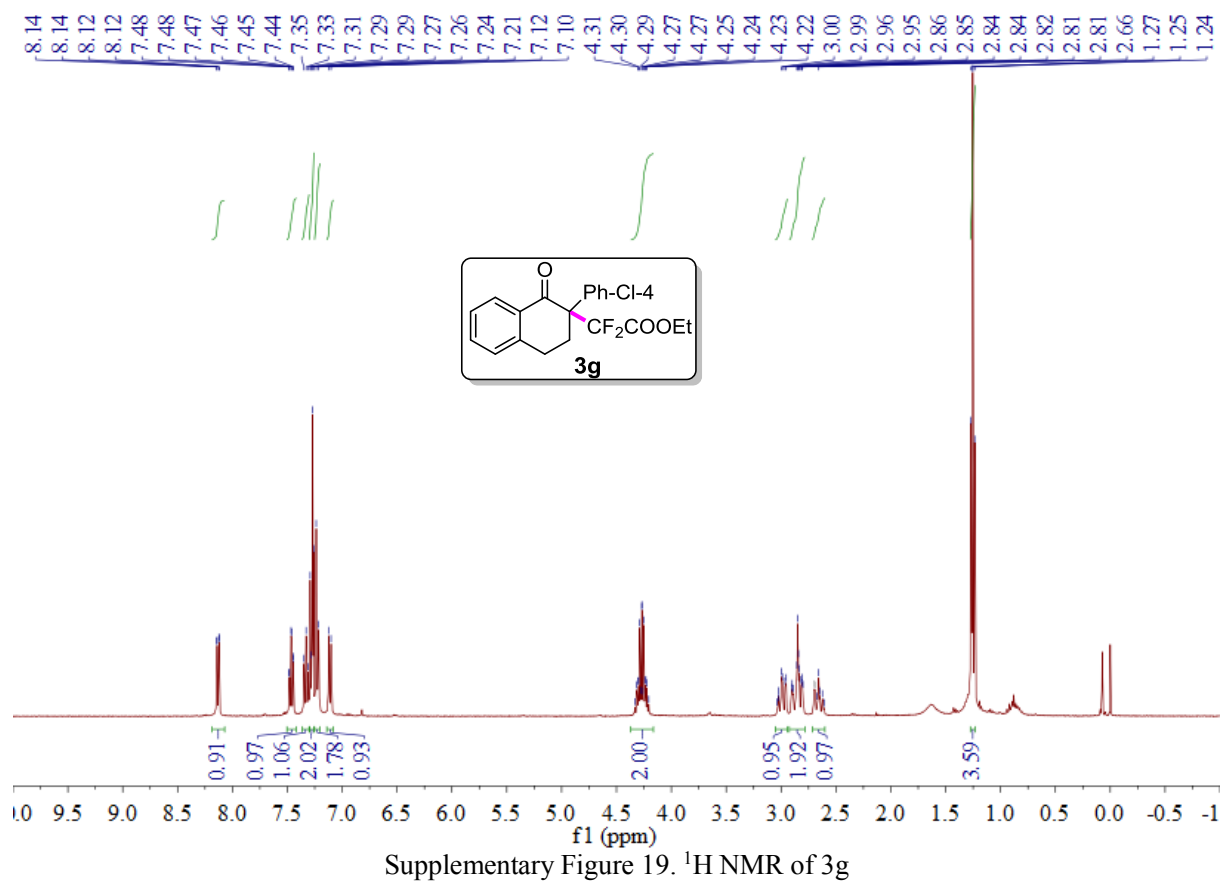

Supplementary Figure 19. <sup>1</sup>H NMR of **3g**

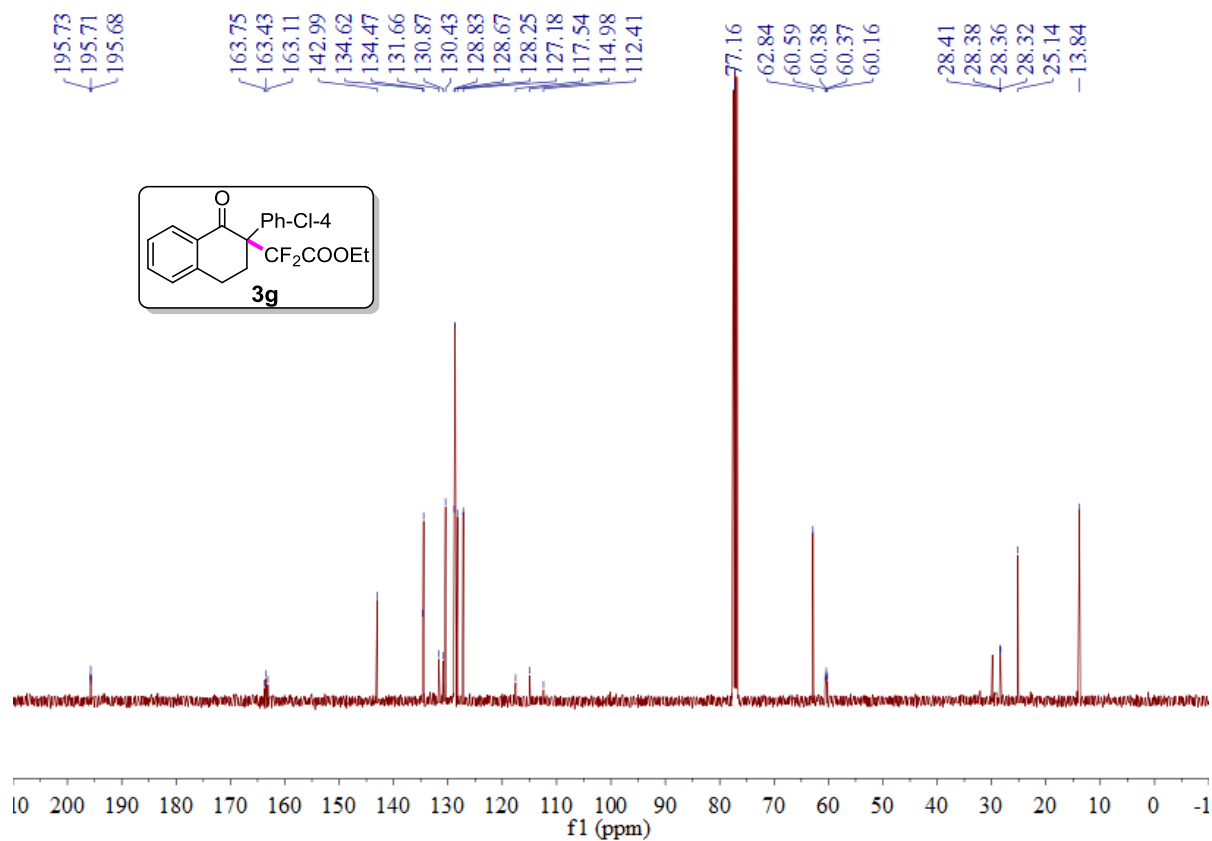

Supplementary Figure 20. <sup>13</sup>C NMR of **3g**

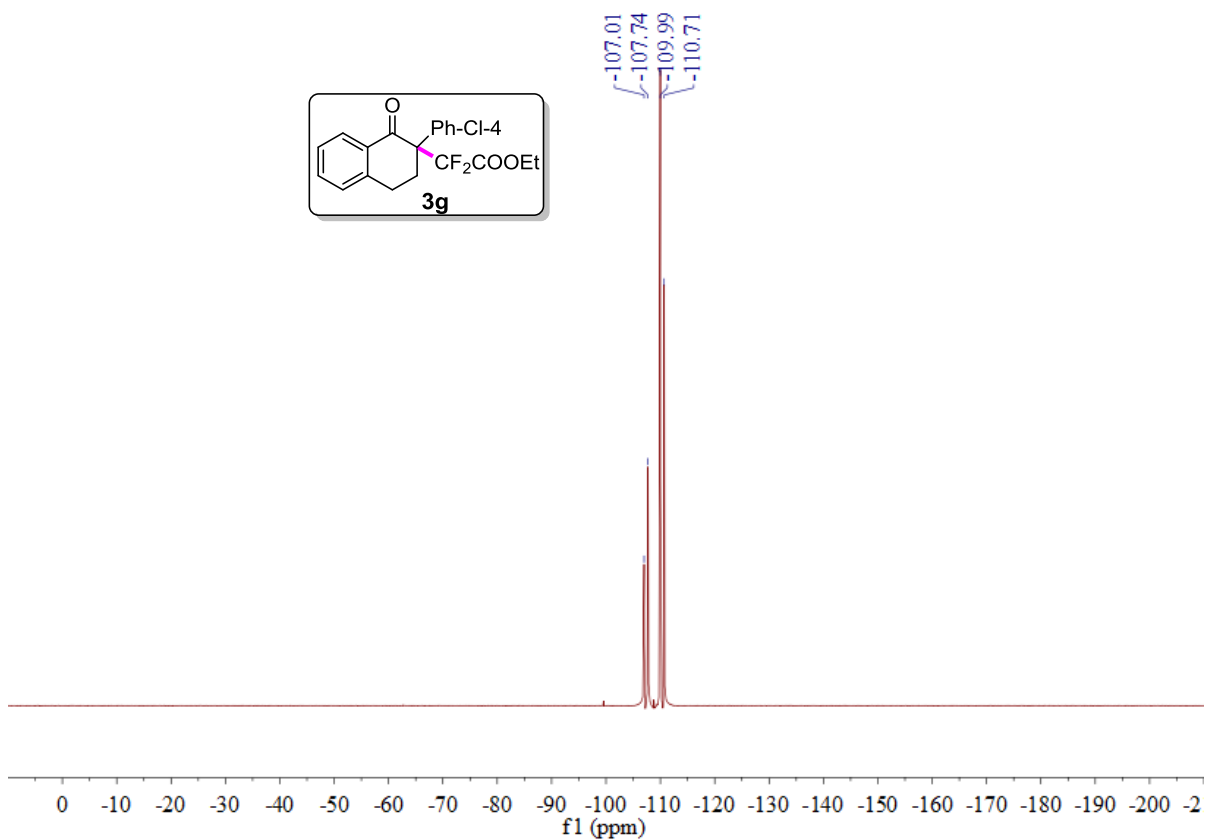

Supplementary Figure 21.  $^{19}\text{F}$  NMR of **3g**

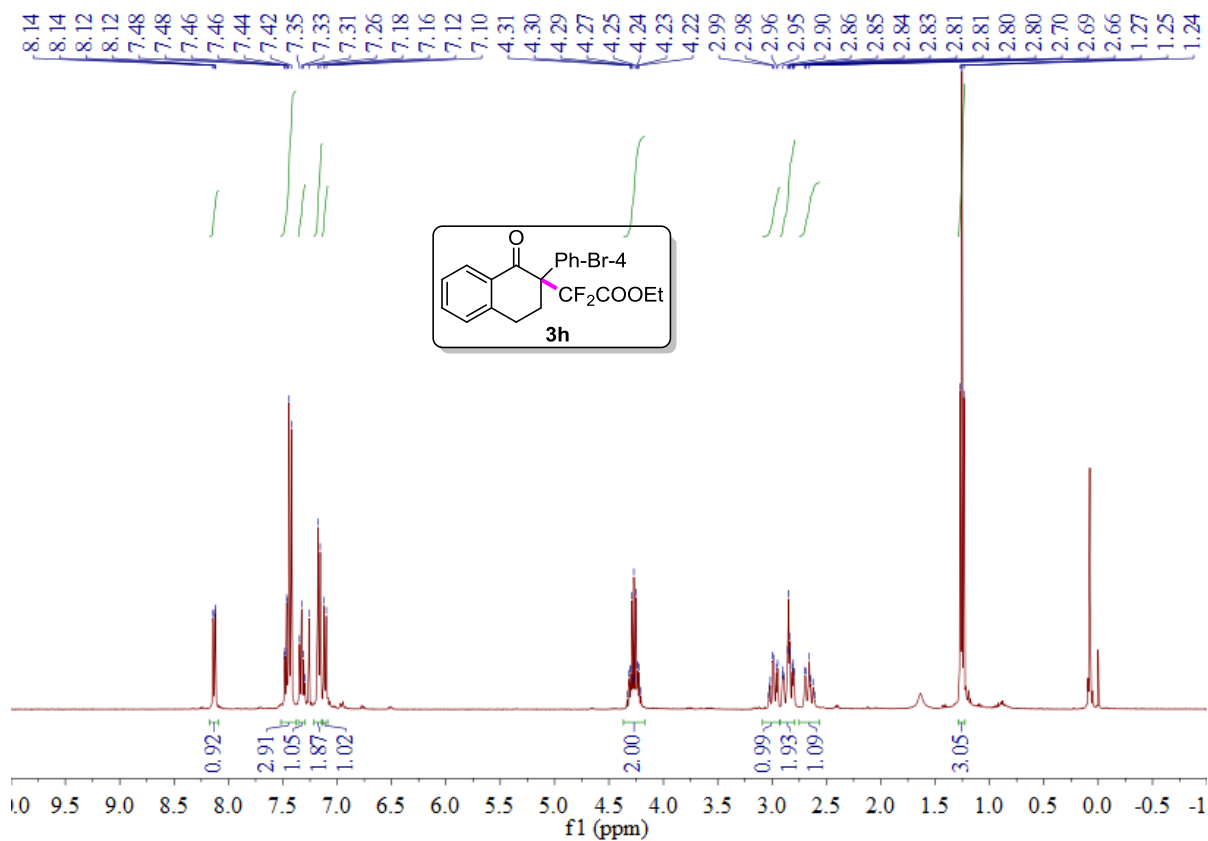

Supplementary Figure 22.  $^1\text{H}$  NMR of **3h**

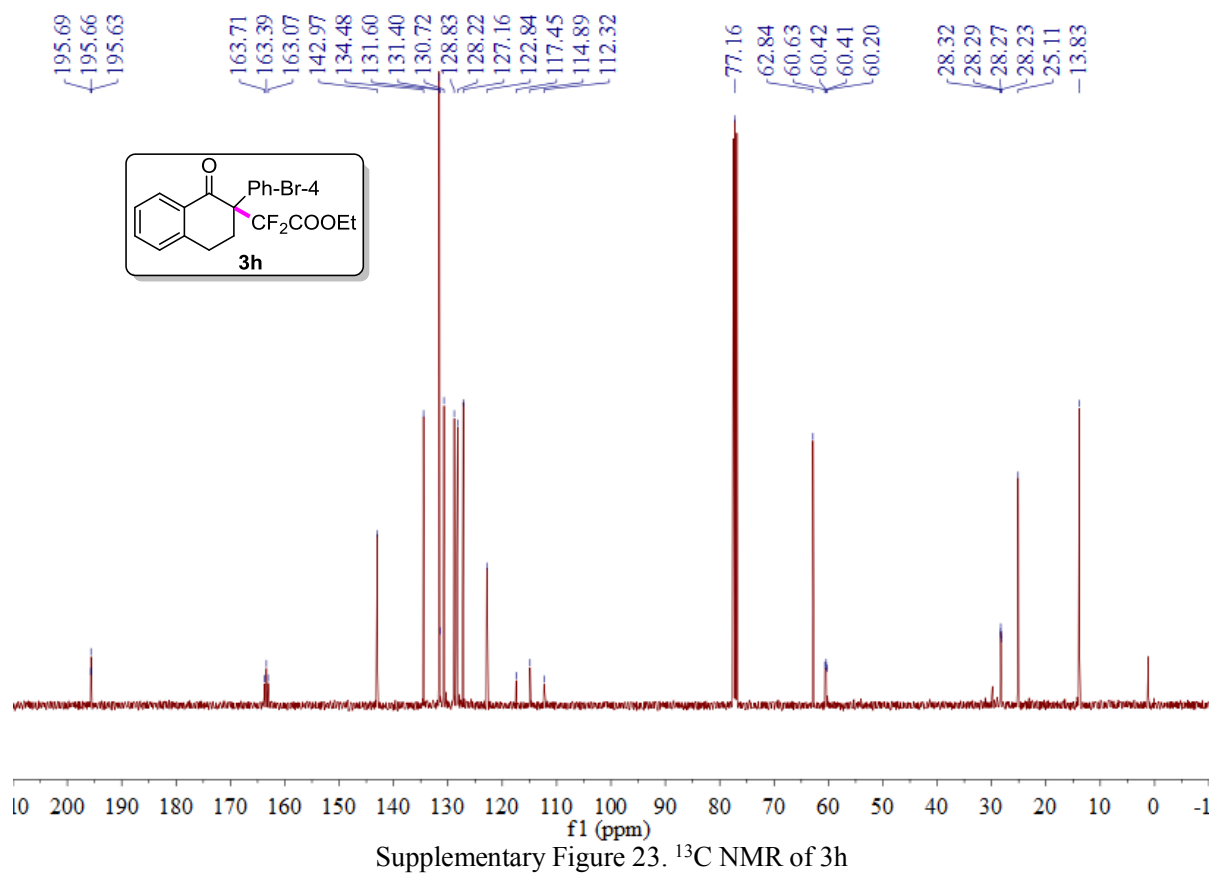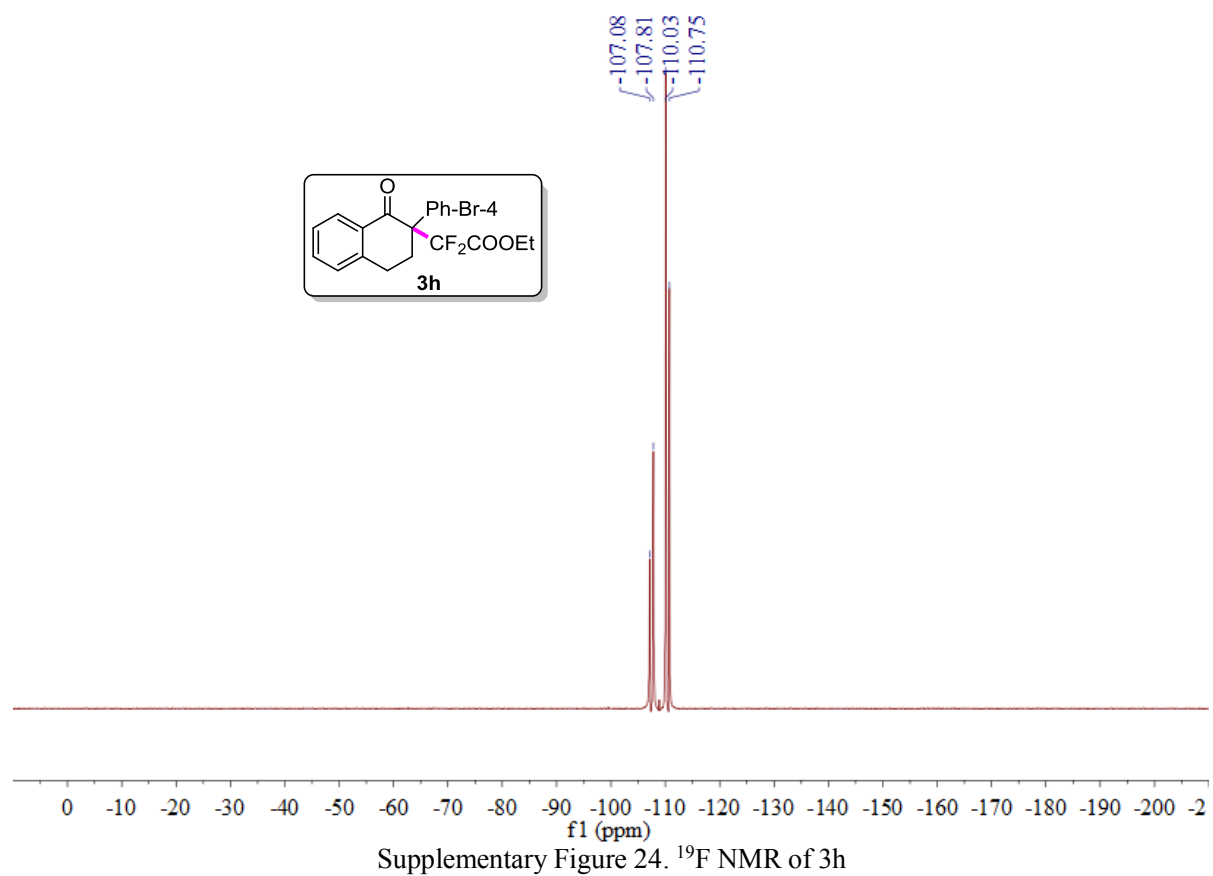

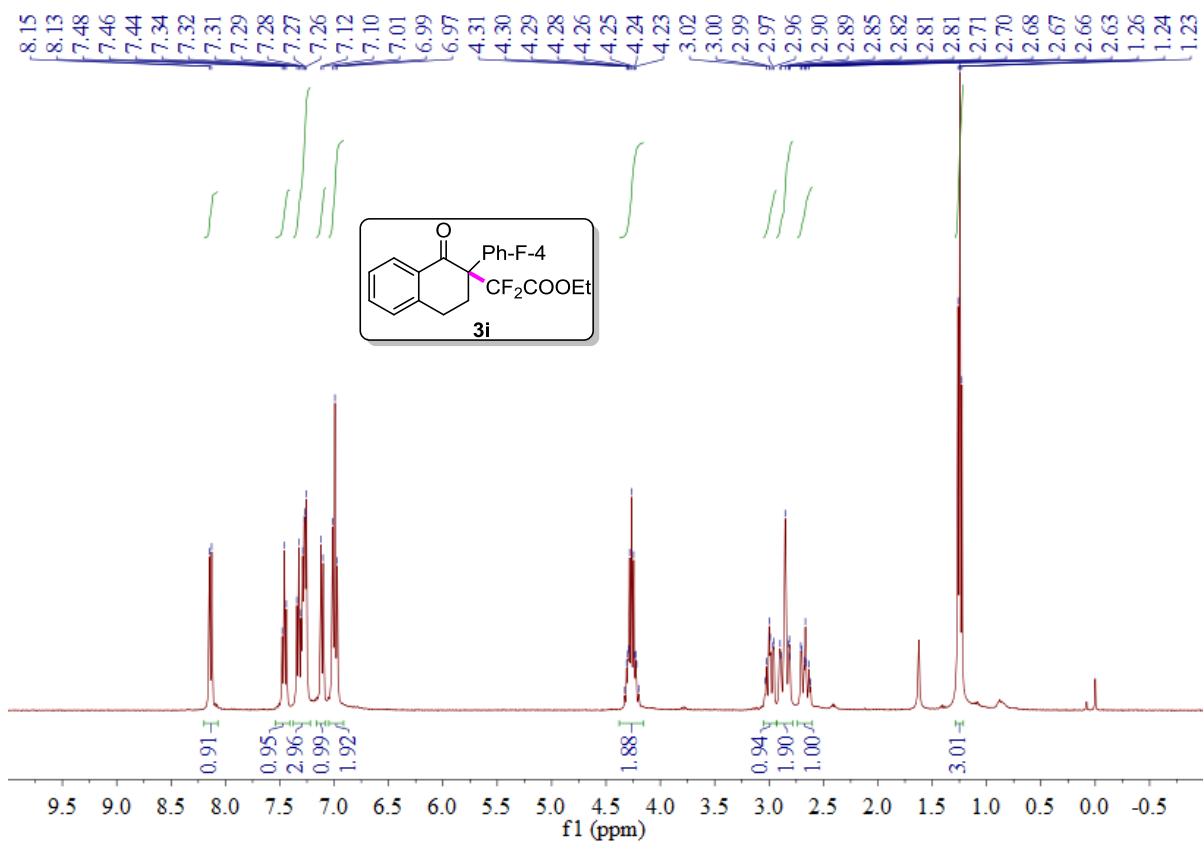

Supplementary Figure 25. <sup>1</sup>H NMR of **3i**

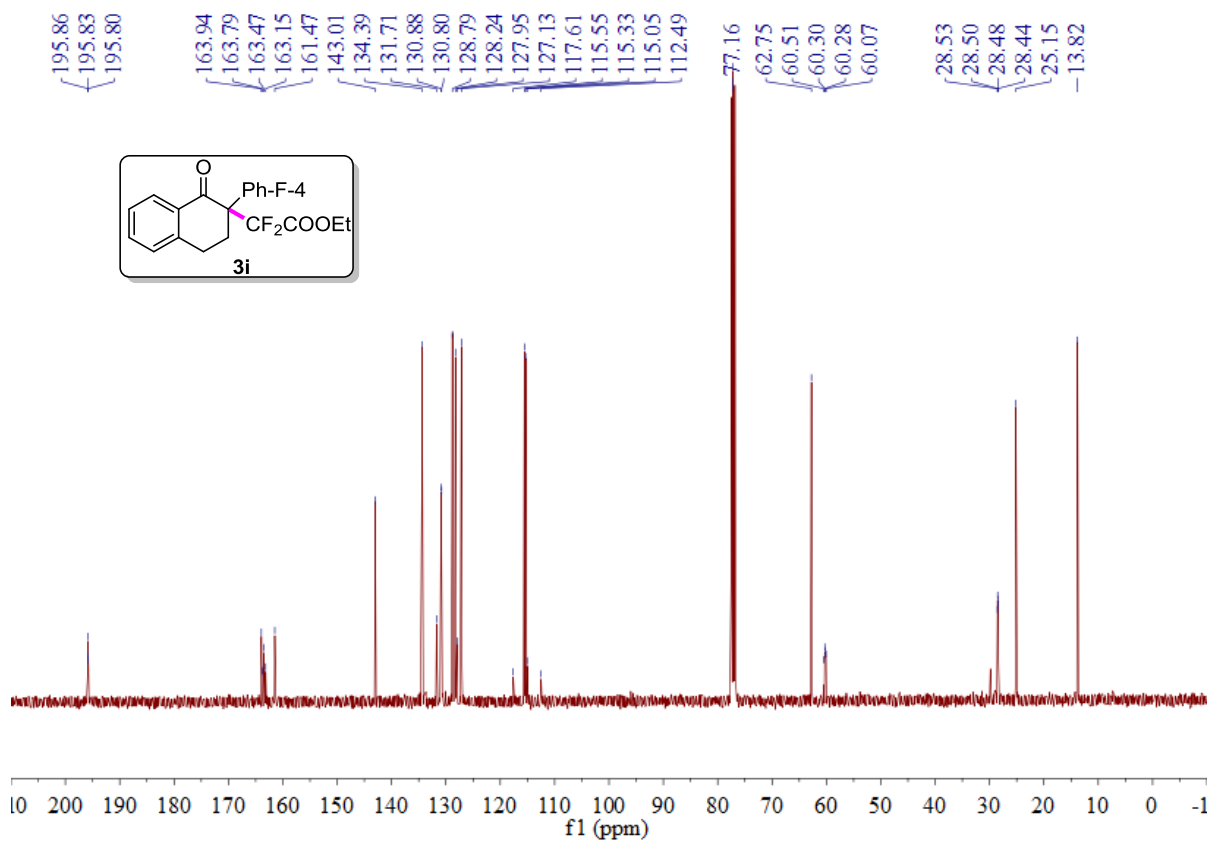

Supplementary Figure 26. <sup>13</sup>C NMR of **3i**

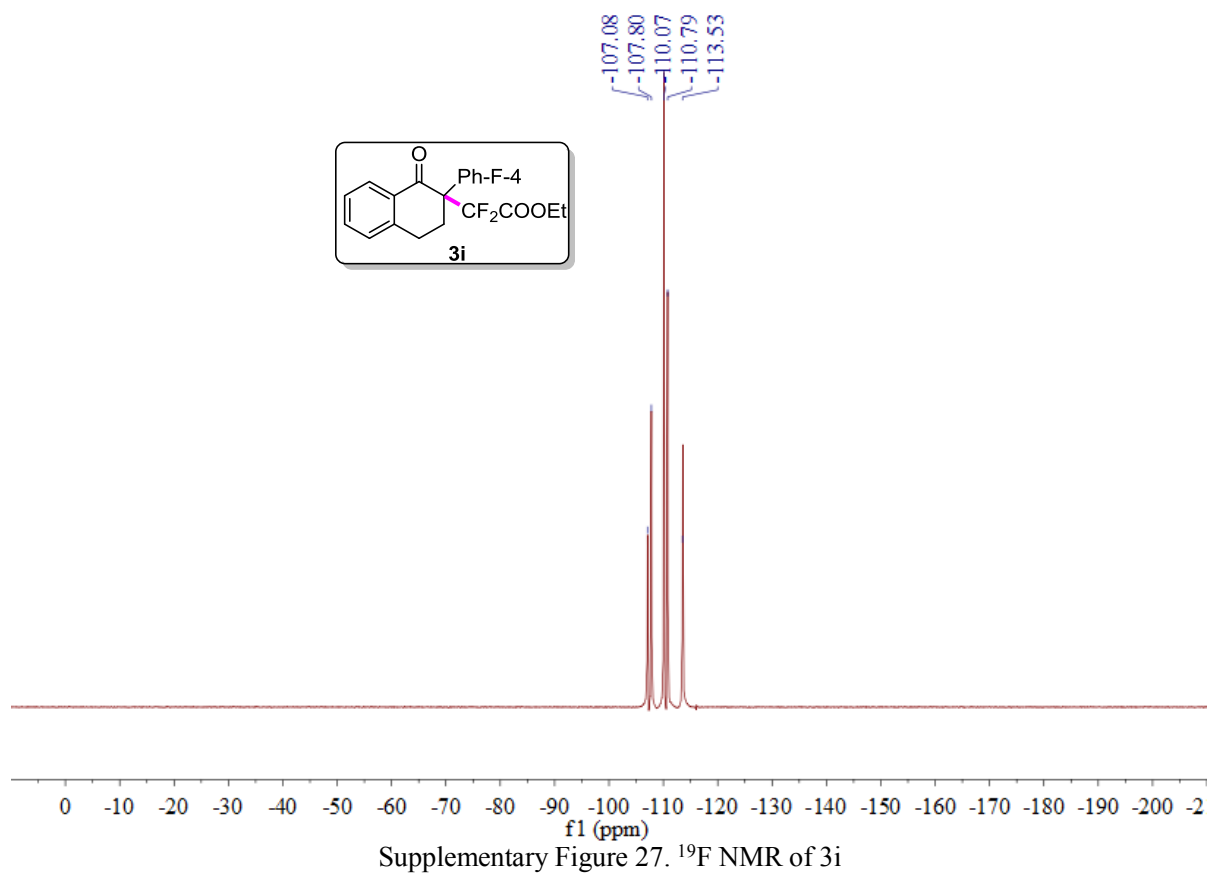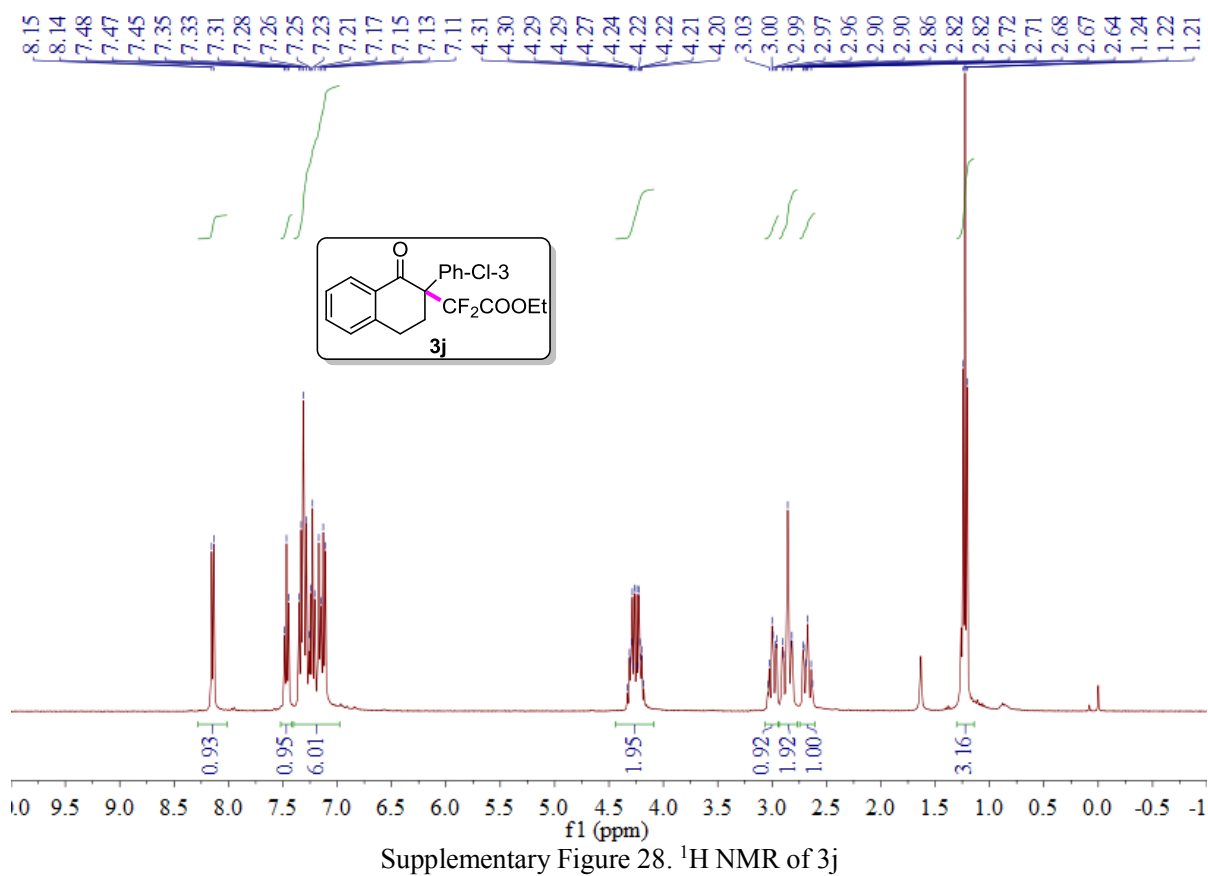

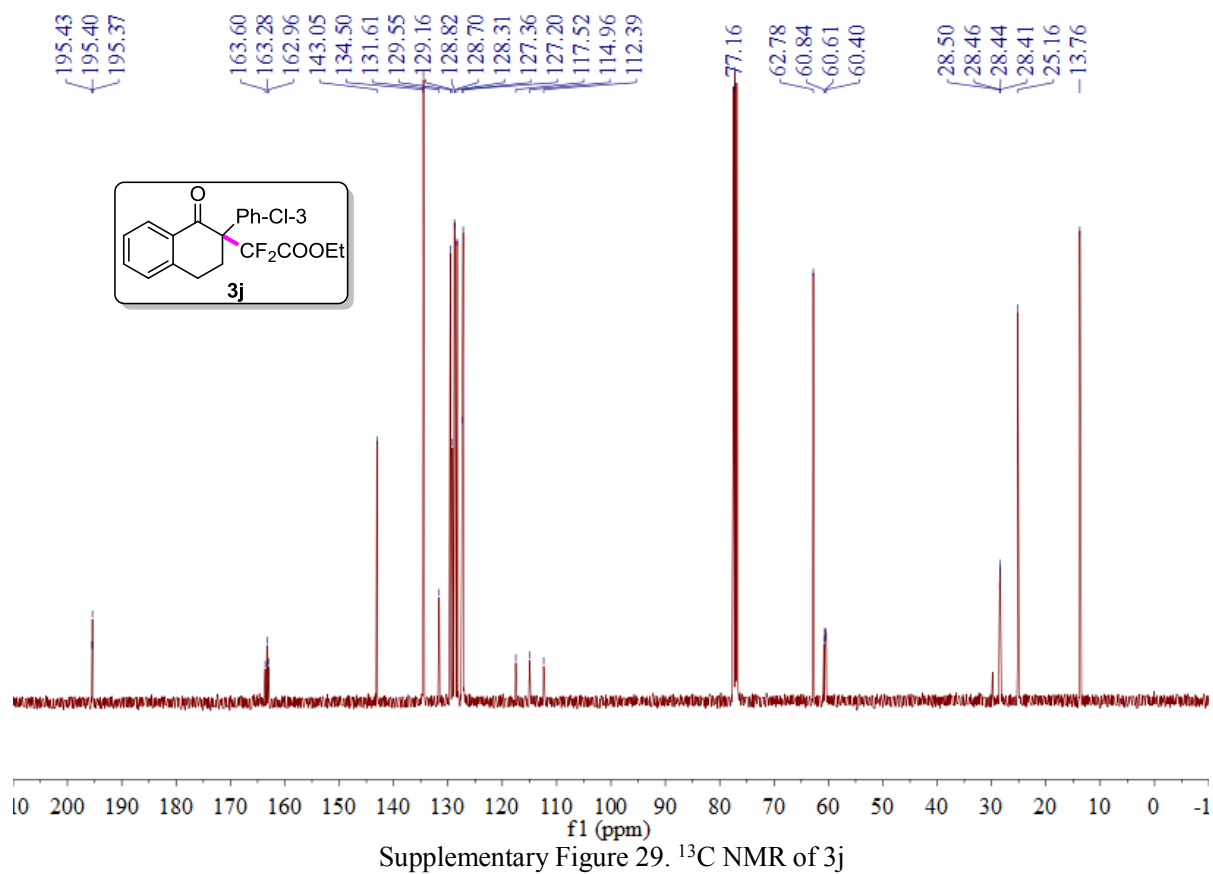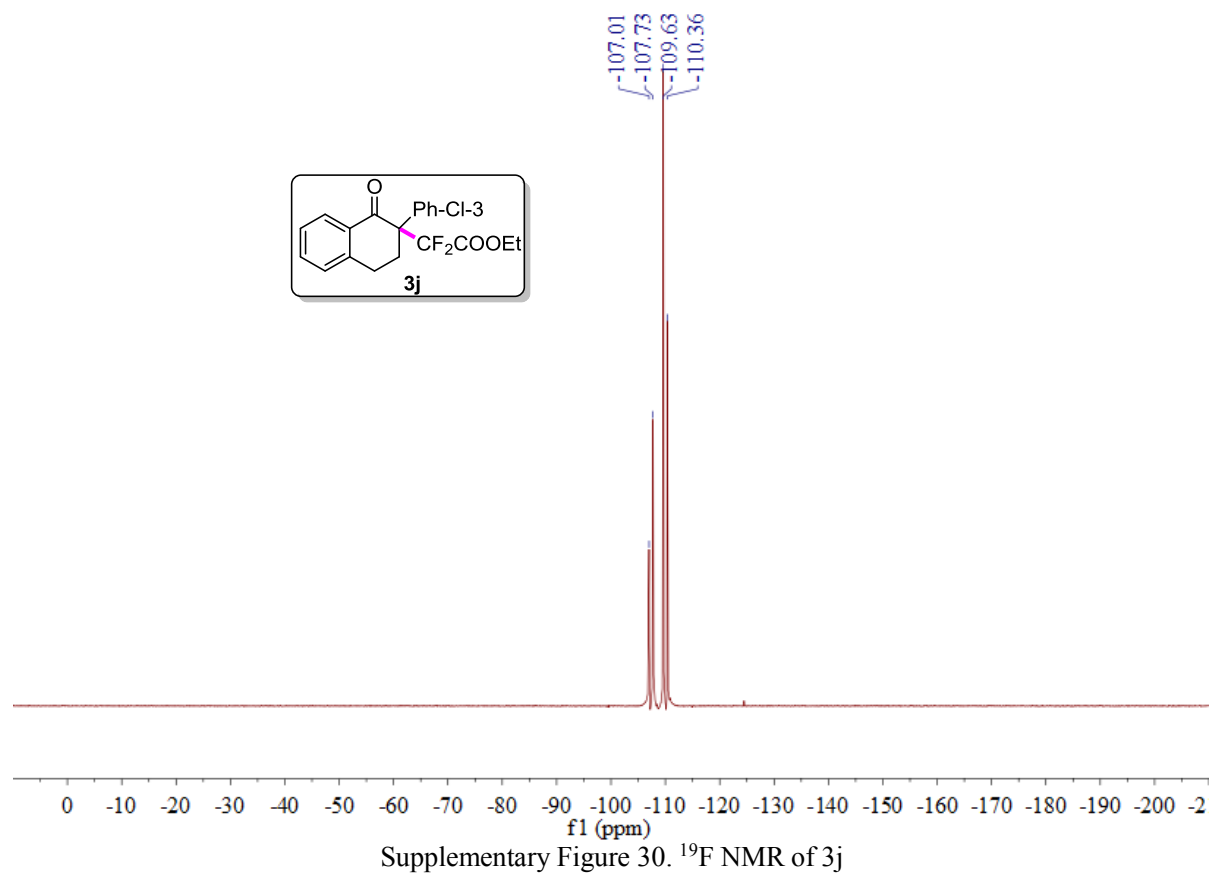



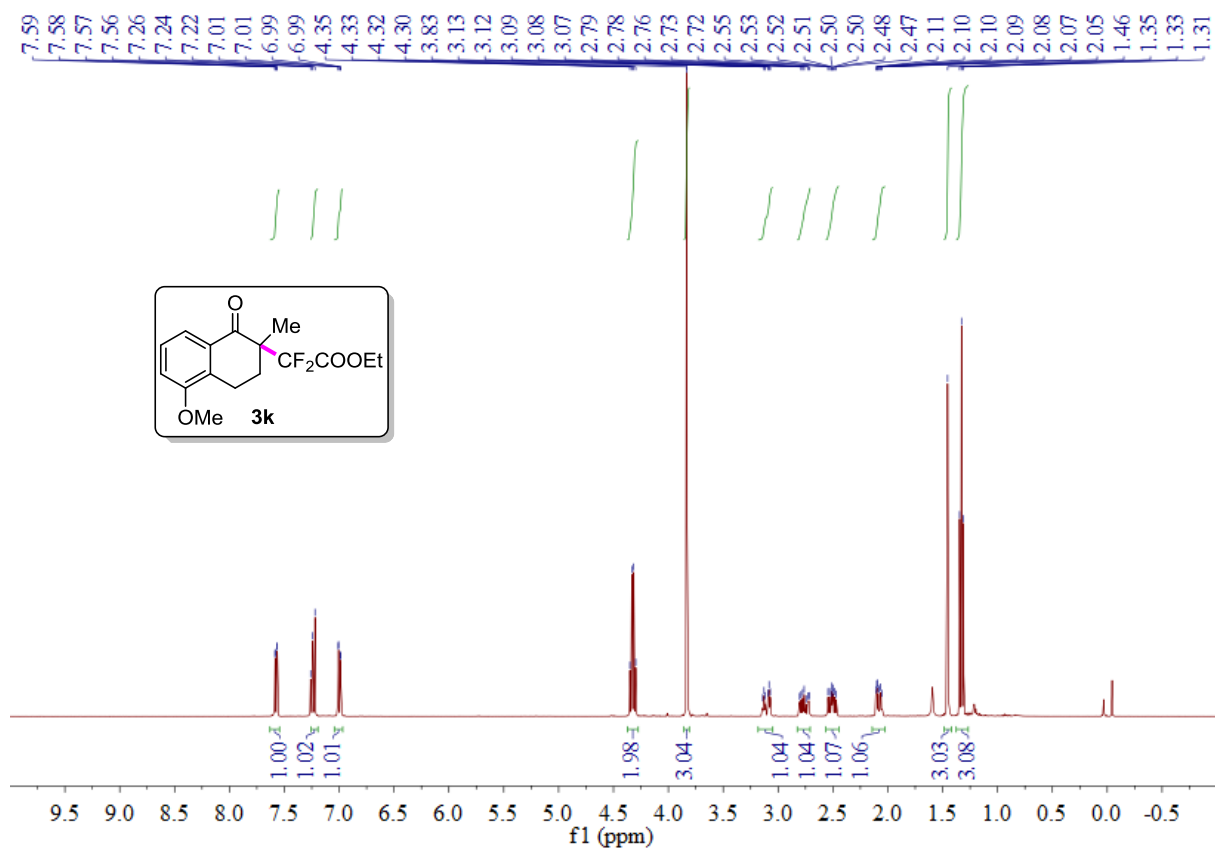

Supplementary Figure 31. <sup>1</sup>H NMR of 3k

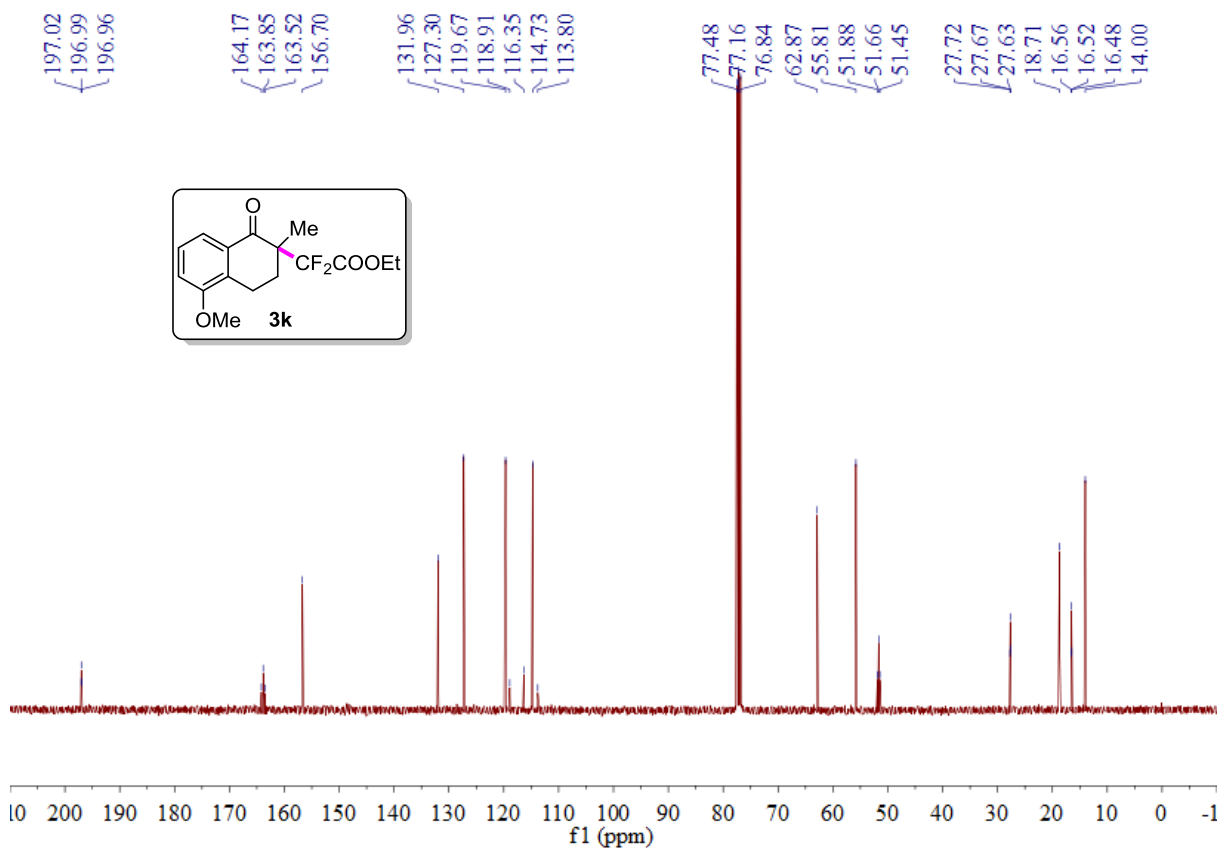

Supplementary Figure 32. <sup>13</sup>C NMR of 3k

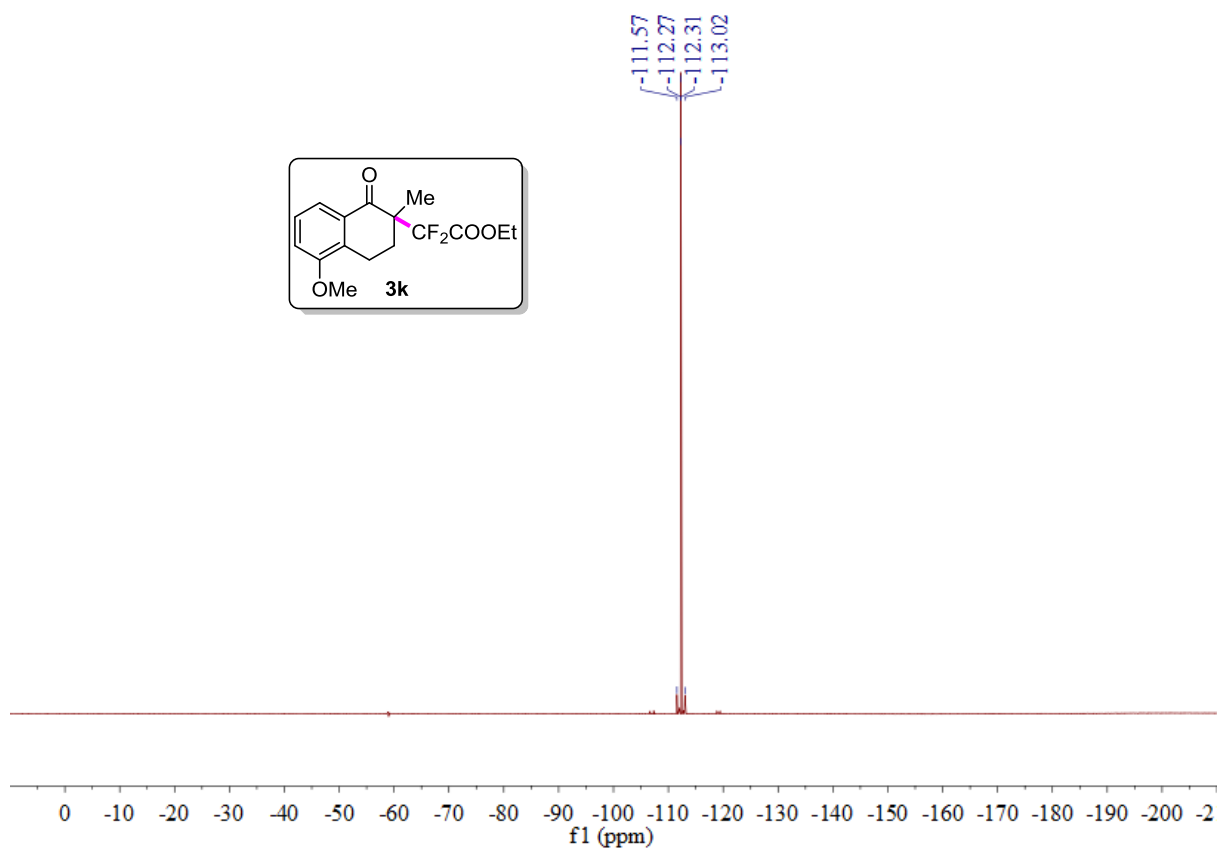

Supplementary Figure 33.  $^{19}\text{F}$  NMR of **3k**

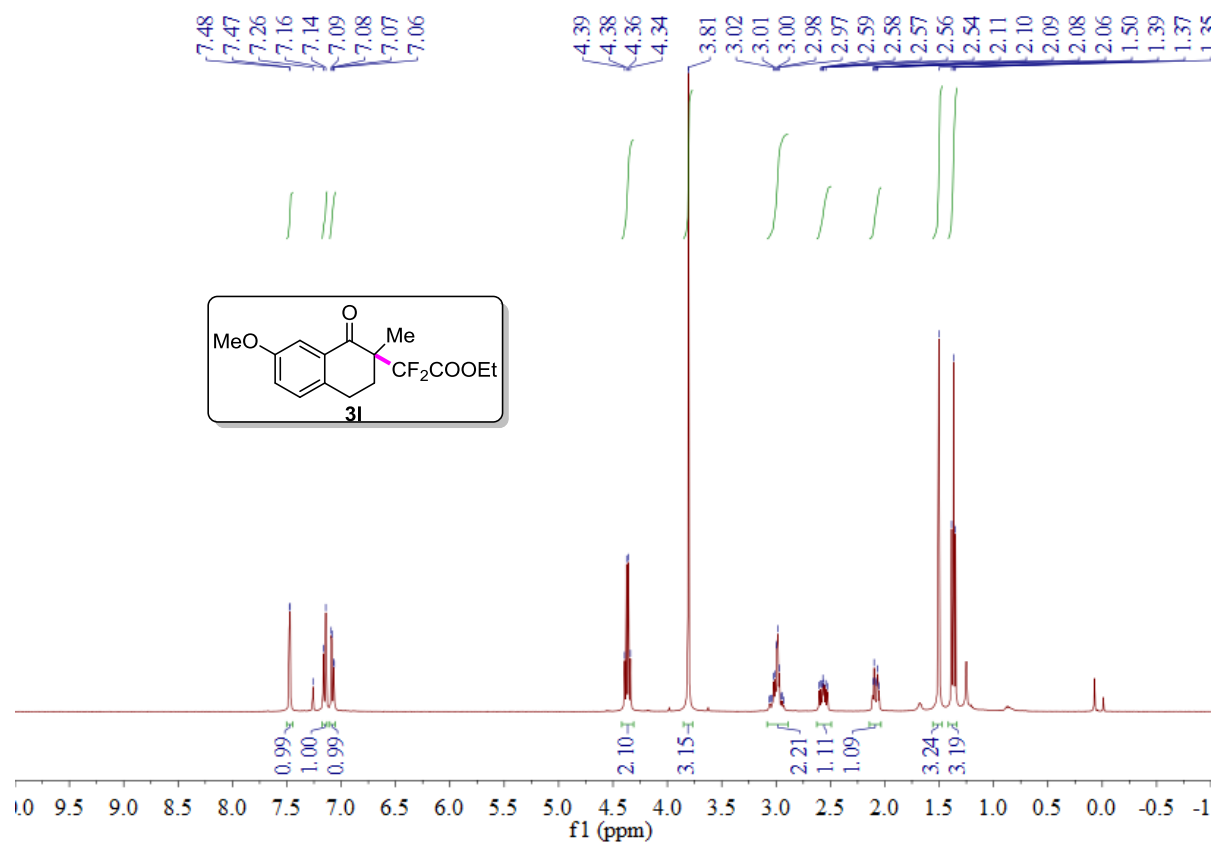

Supplementary Figure 34.  $^1\text{H}$  NMR of **3l**

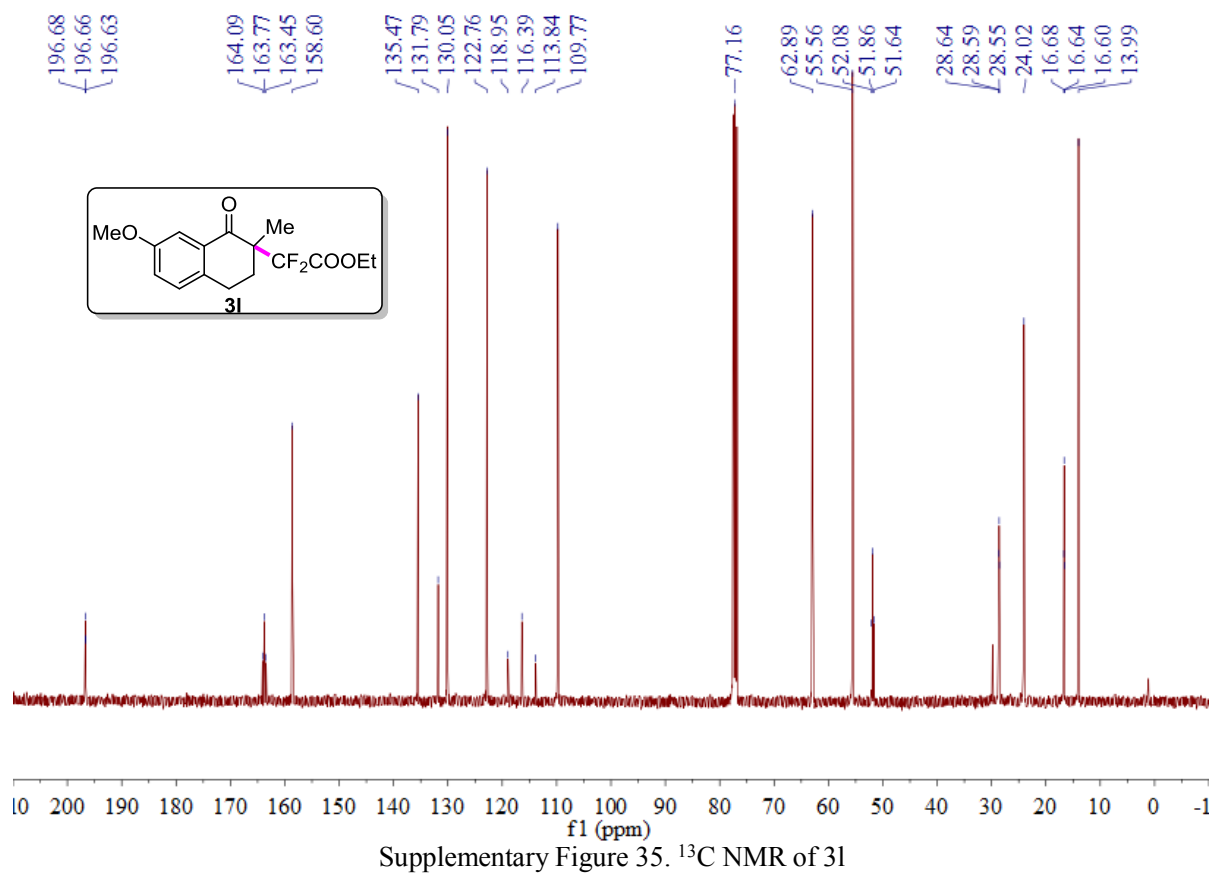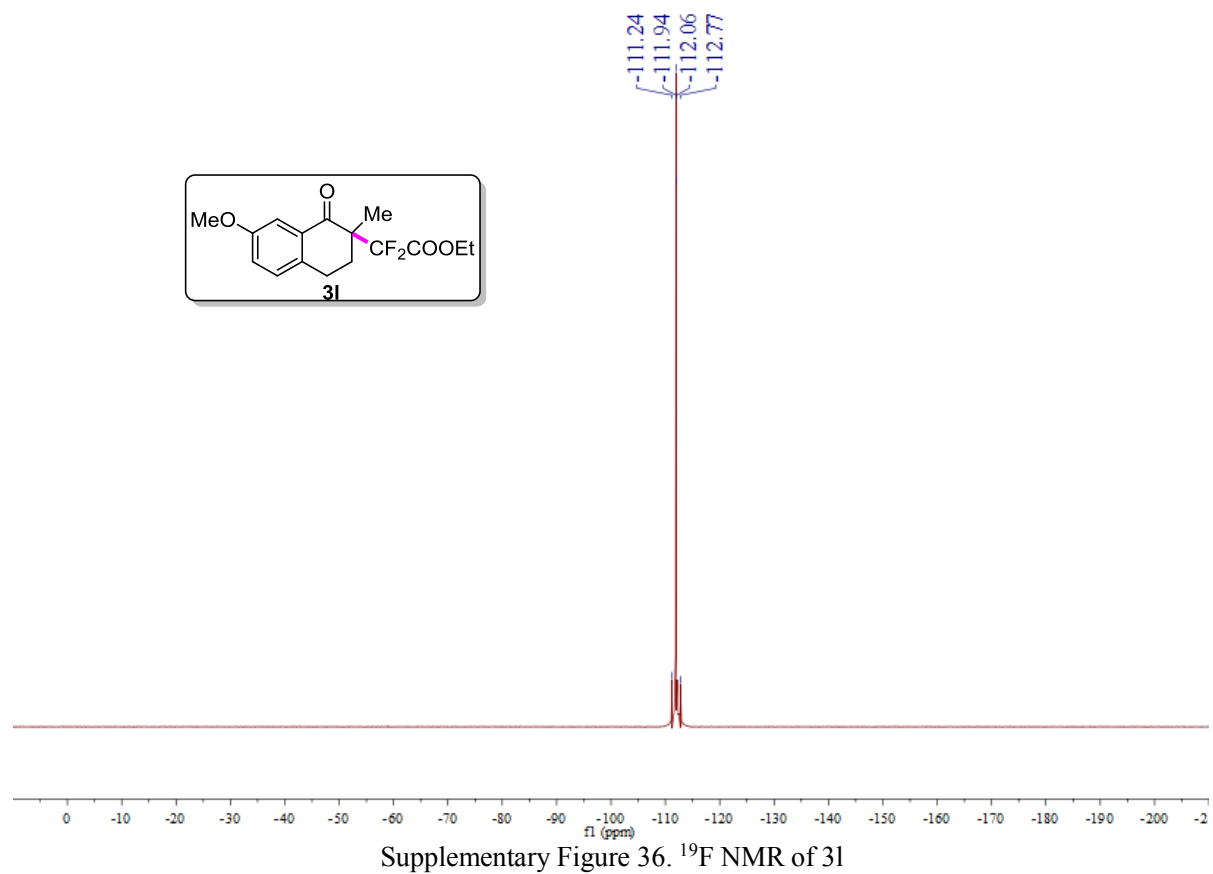

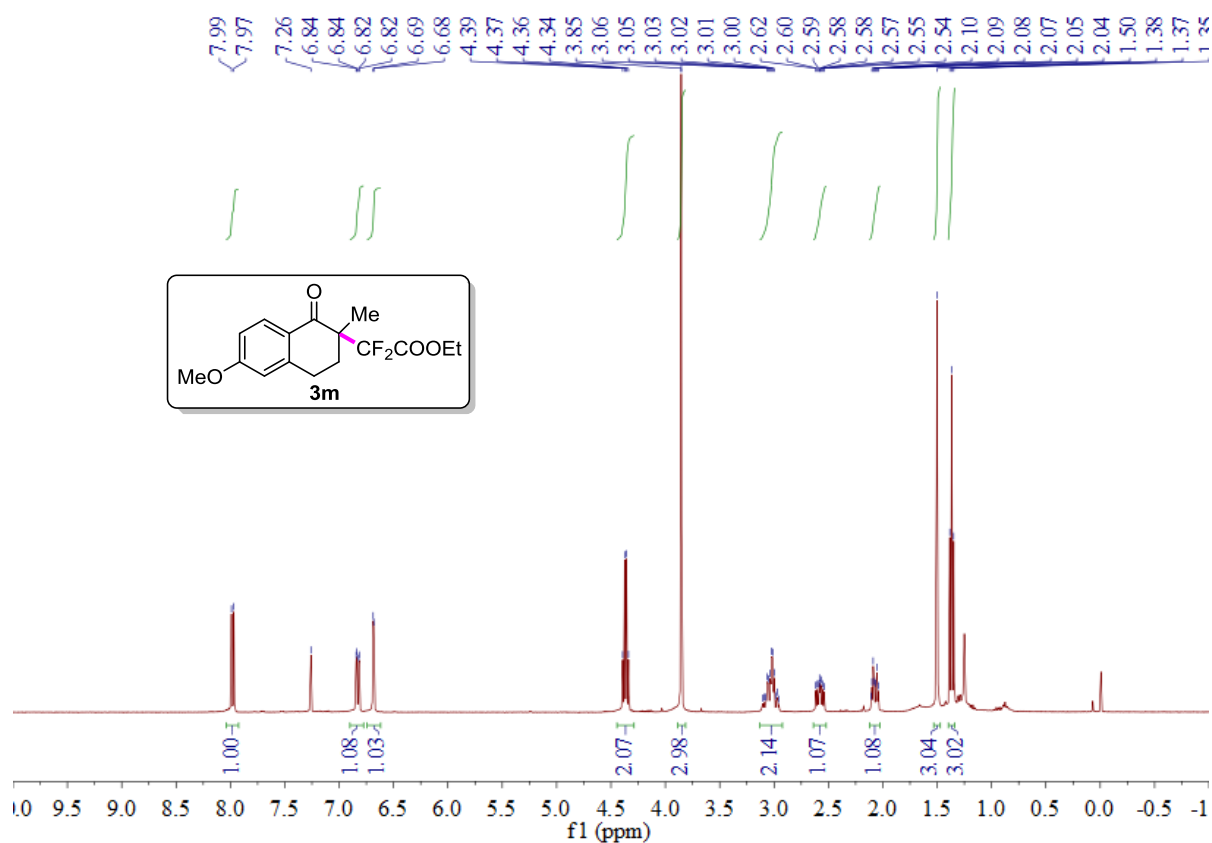

Supplementary Figure 37. <sup>1</sup>H NMR of 3m

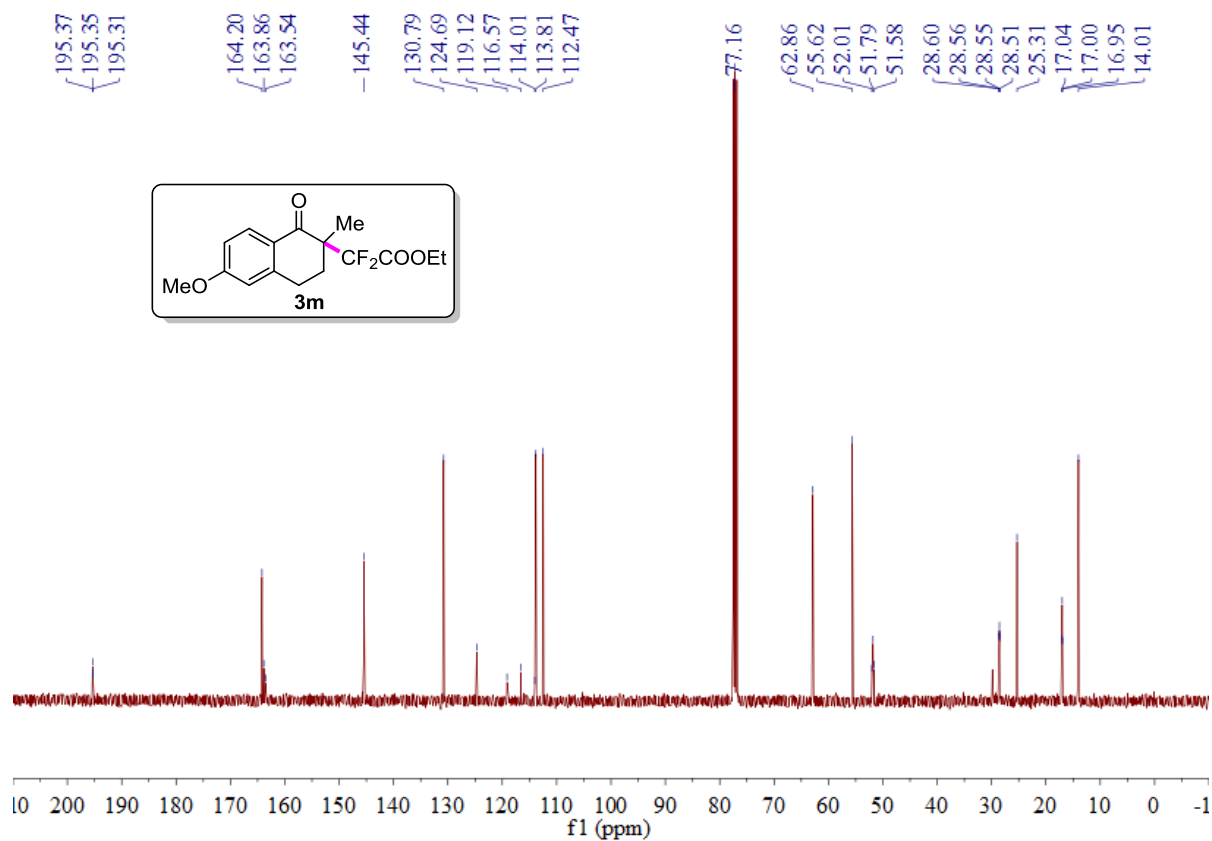

Supplementary Figure 38. <sup>13</sup>C NMR of 3m

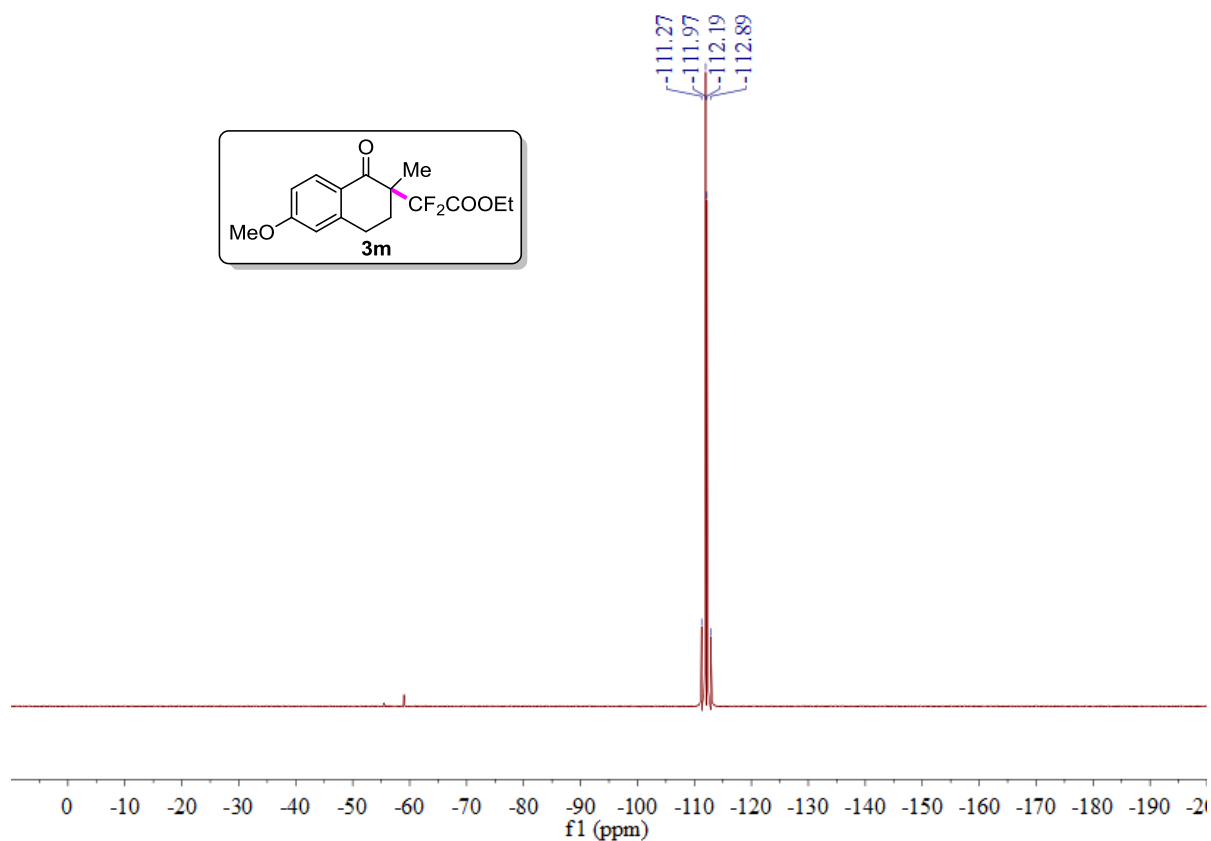

Supplementary Figure 39.  $^{19}\text{F}$  NMR of **3m**

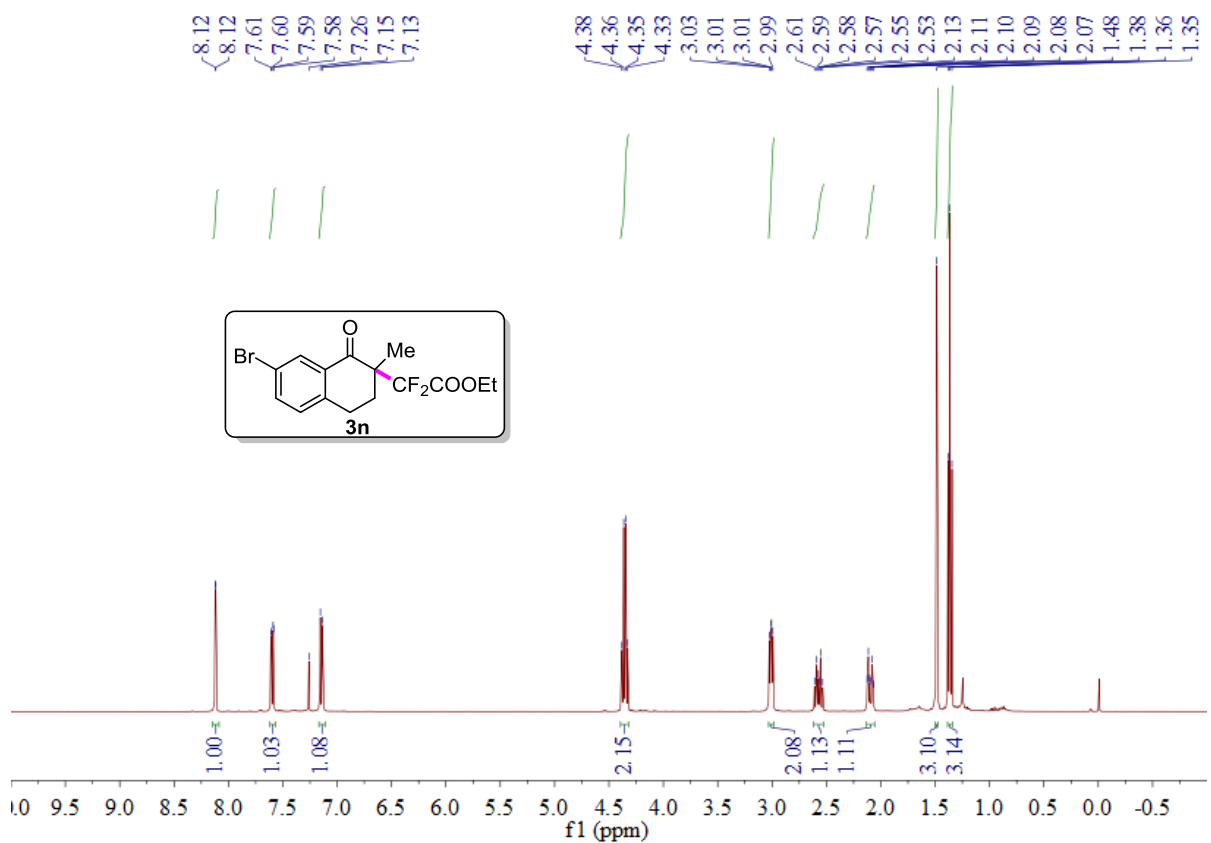

Supplementary Figure 40.  $^1\text{H}$  NMR of **3n**

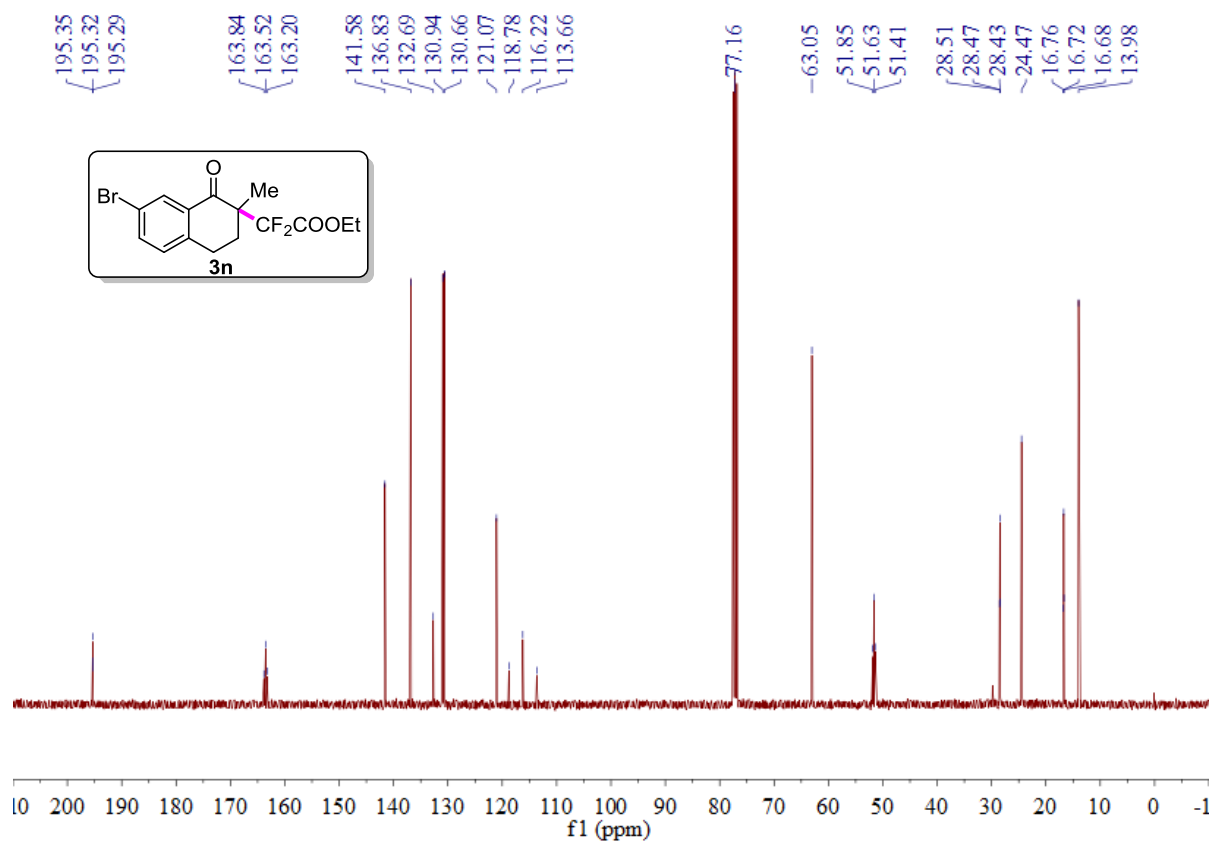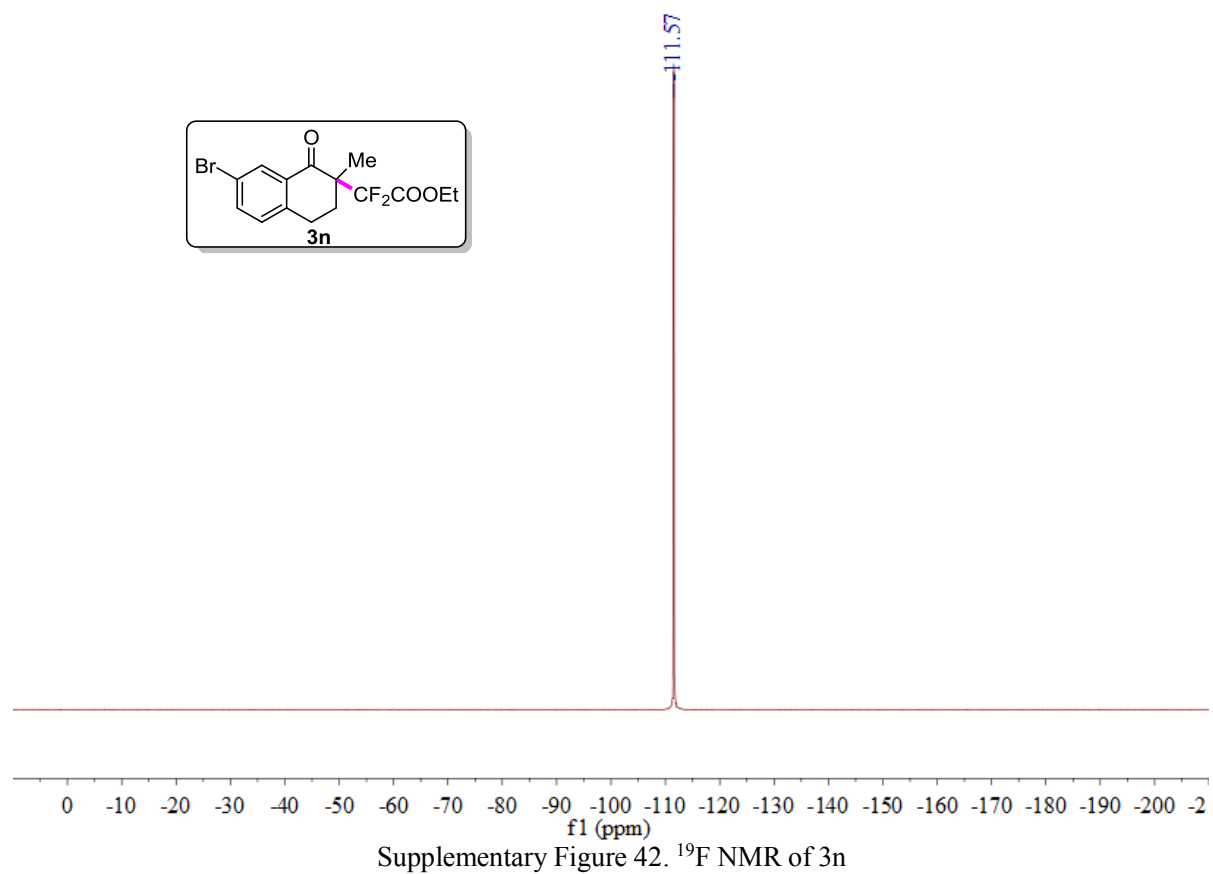

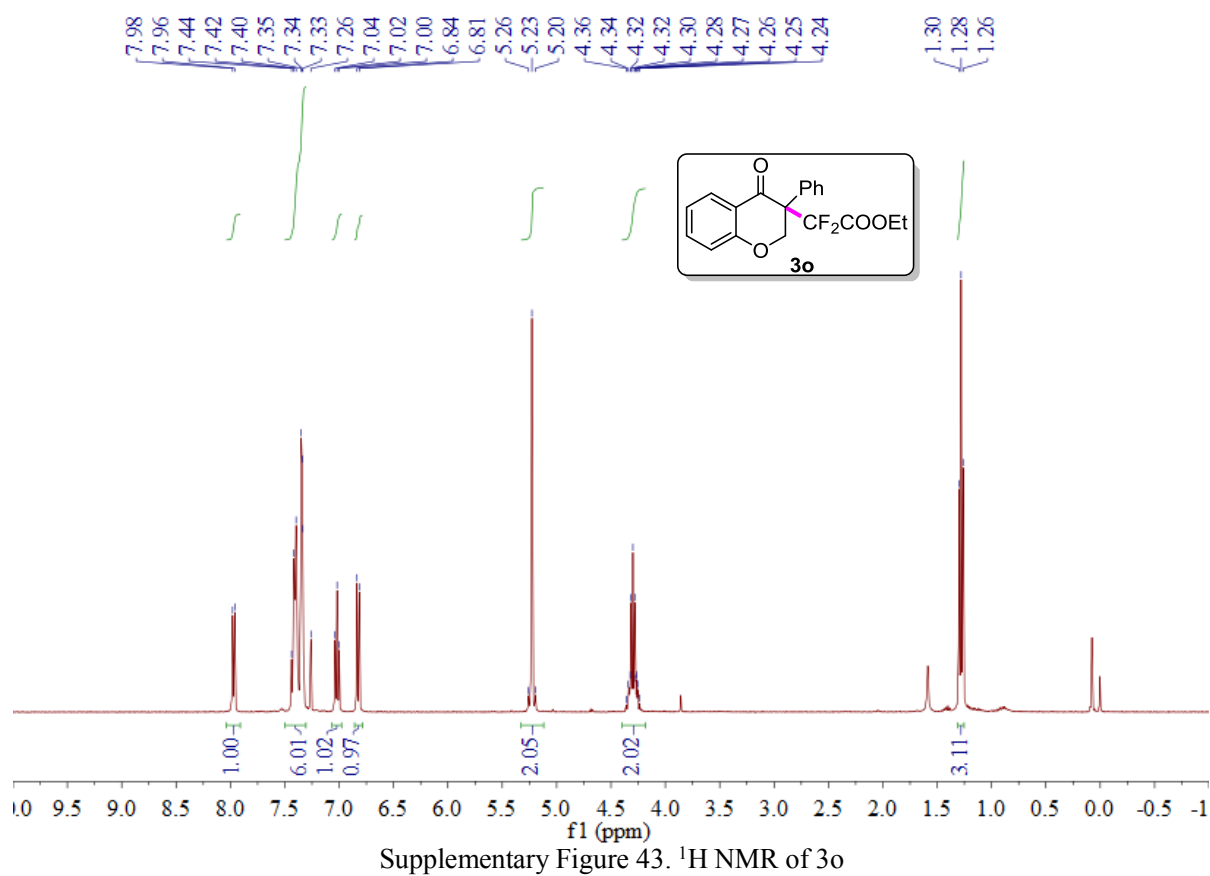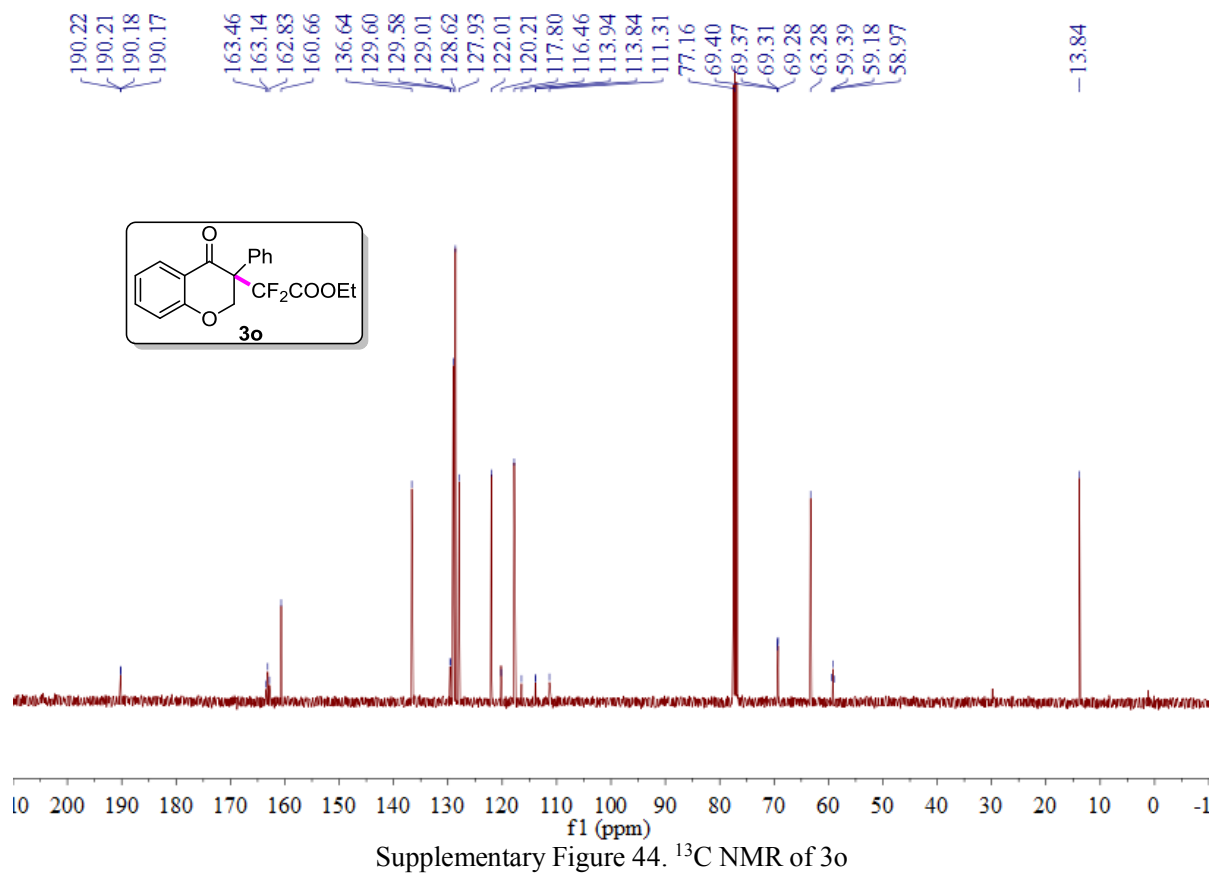

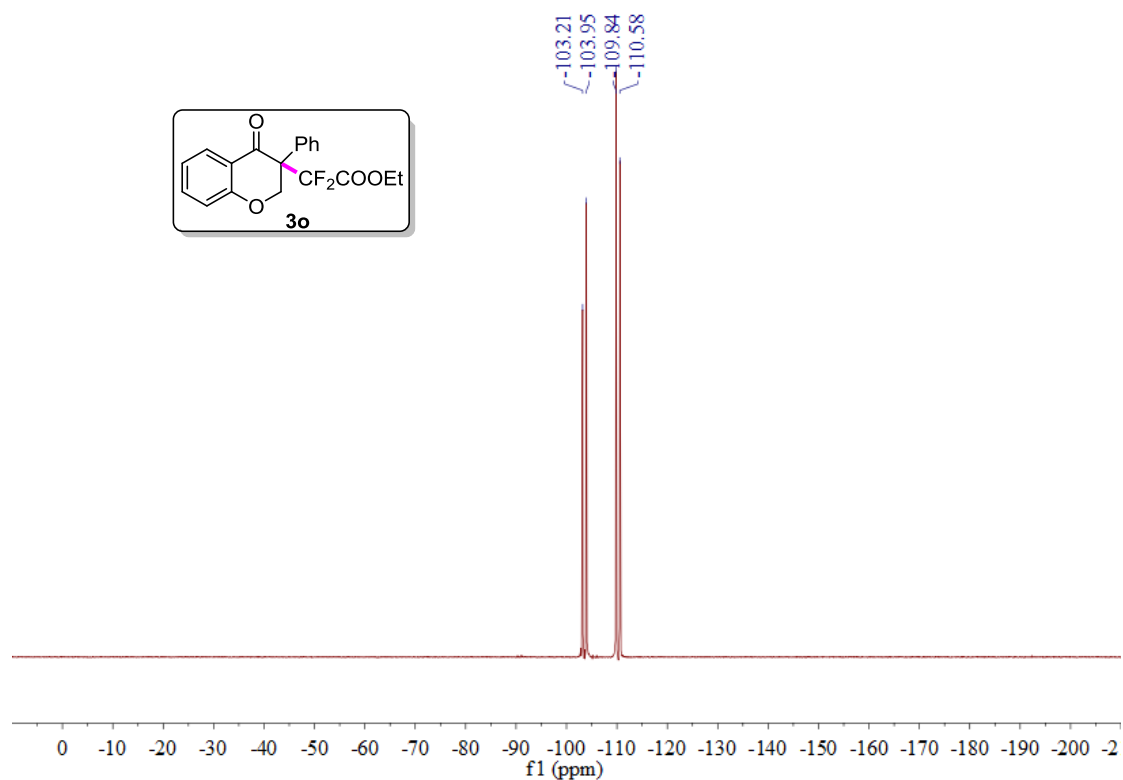

Supplementary Figure 45.  $^{19}\text{F}$  NMR of **3o**

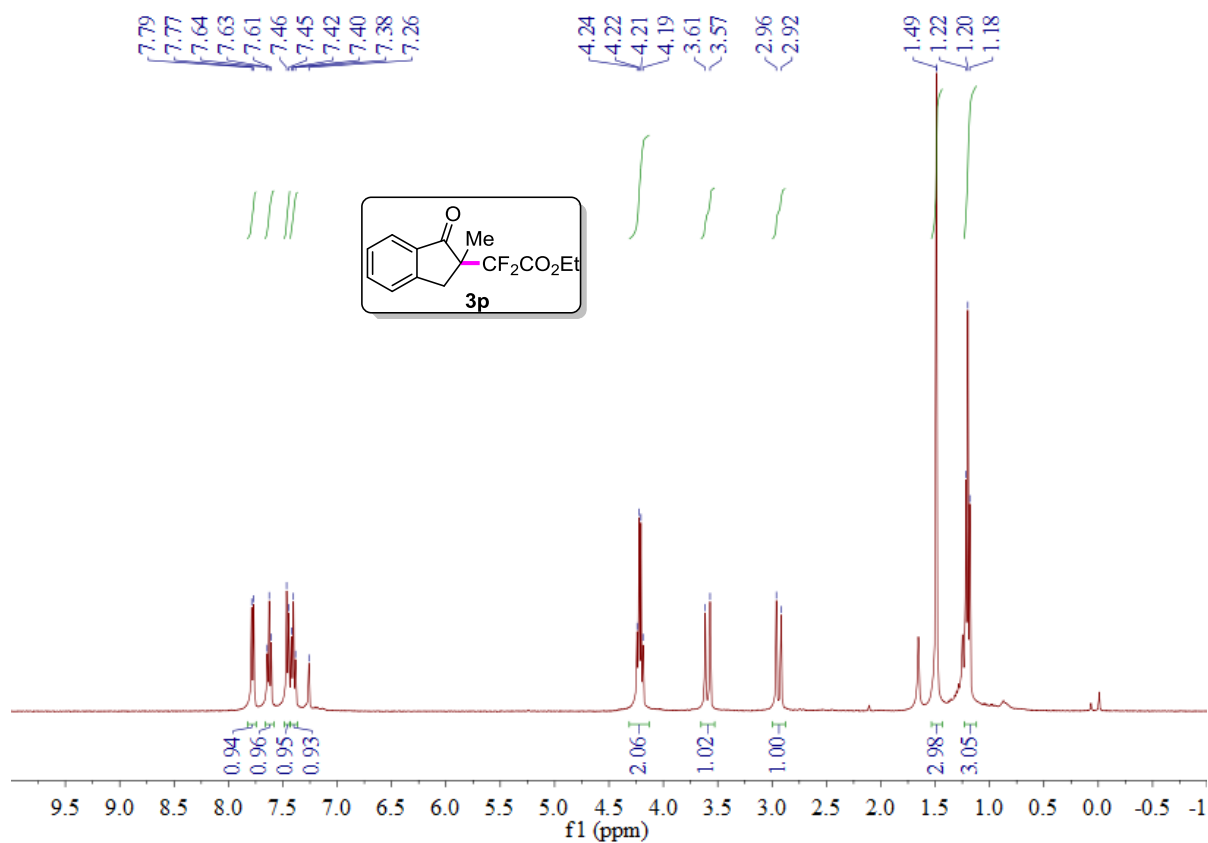

Supplementary Figure 46.  $^1\text{H}$  NMR of **3p**



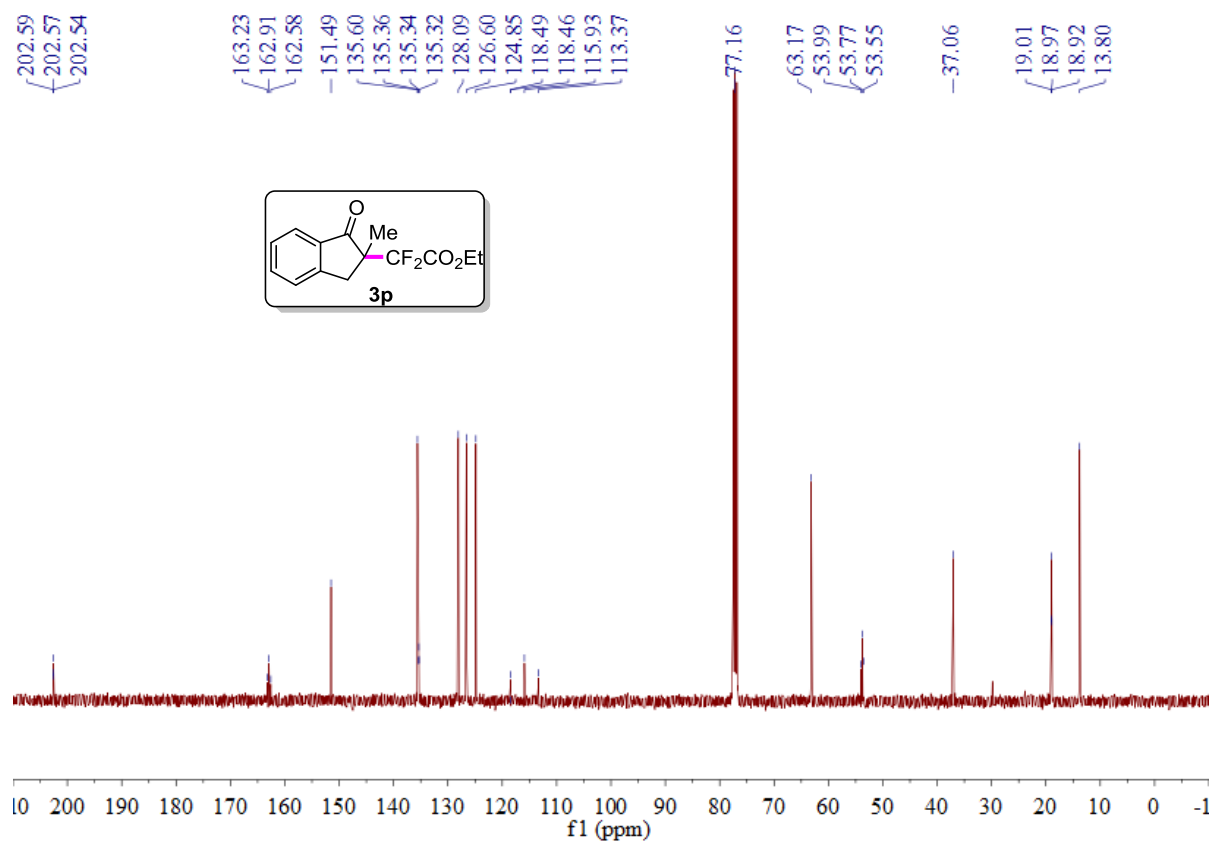

Supplementary Figure 47.  $^{13}\text{C}$  NMR of 3p

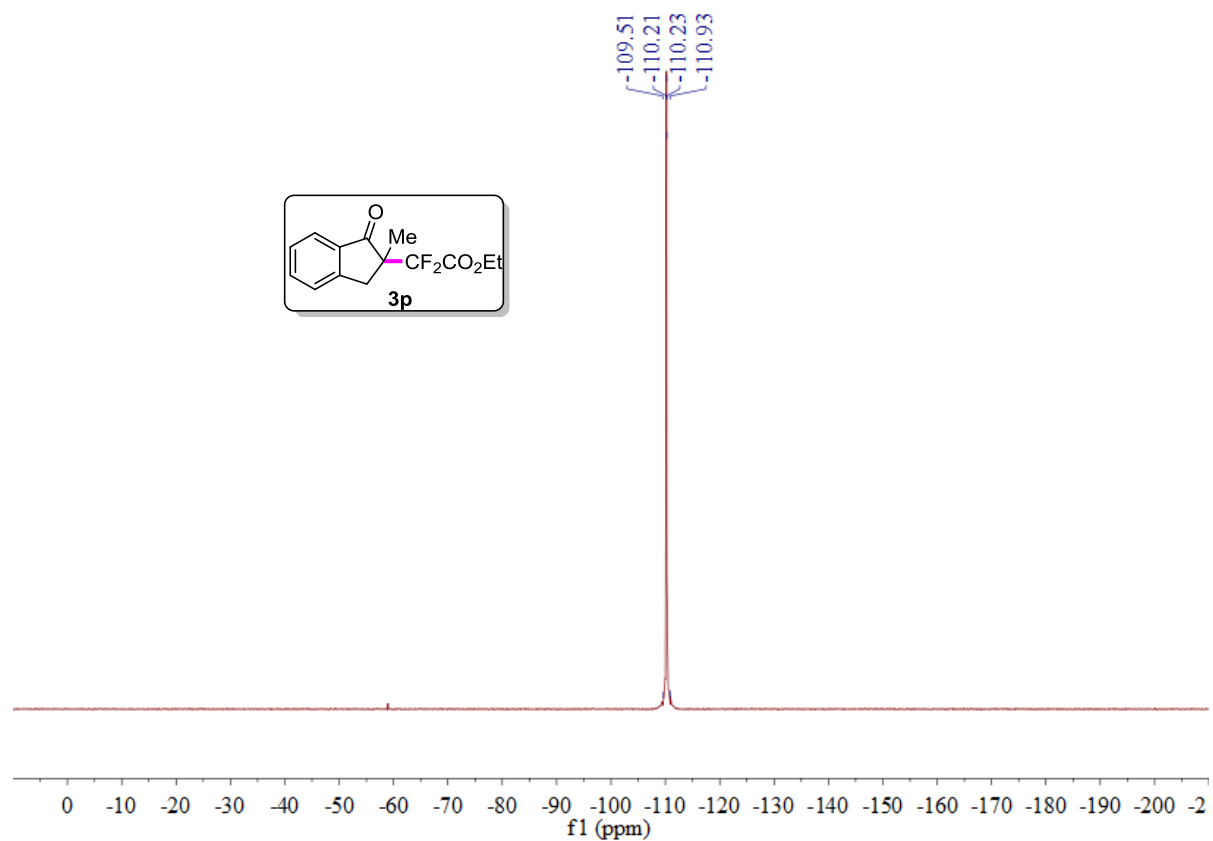

Supplementary Figure 48.  $^{19}\text{F}$  NMR of 3p

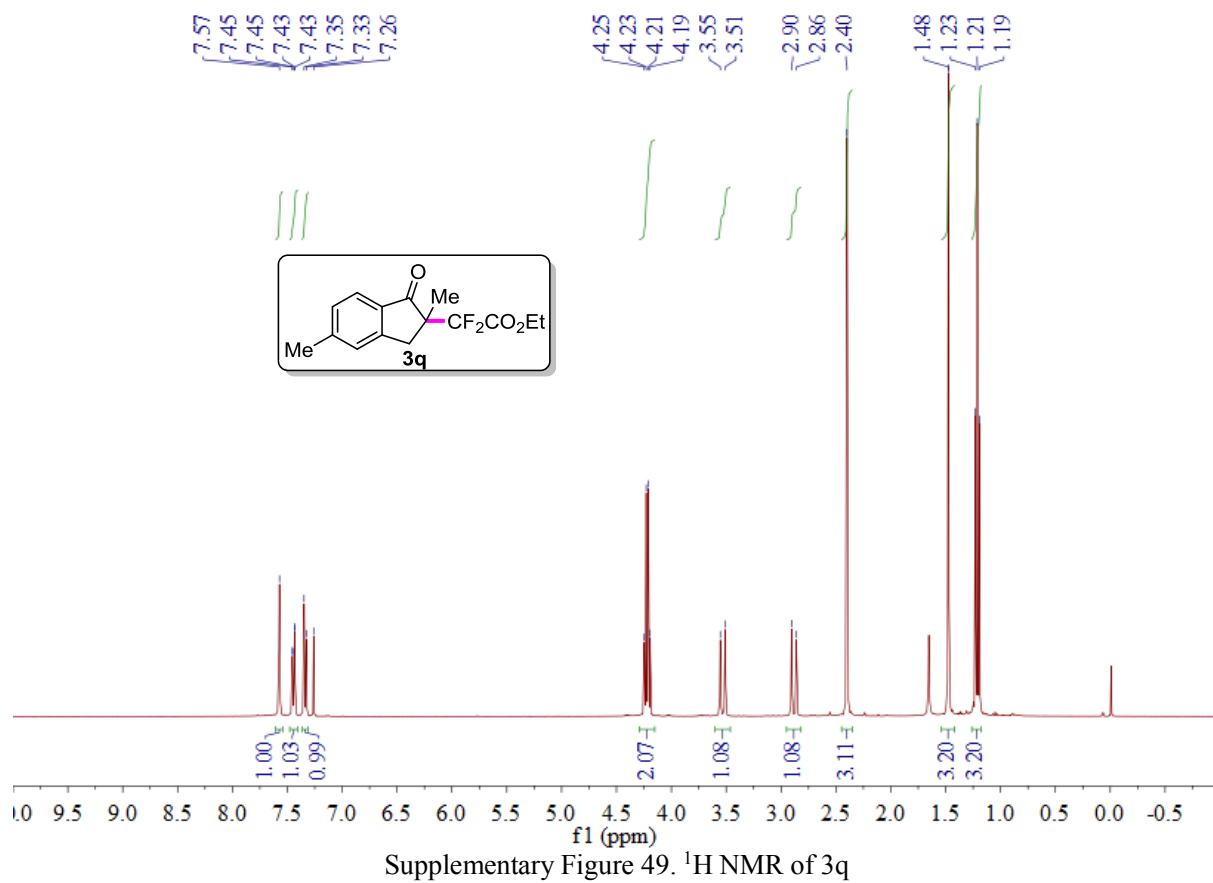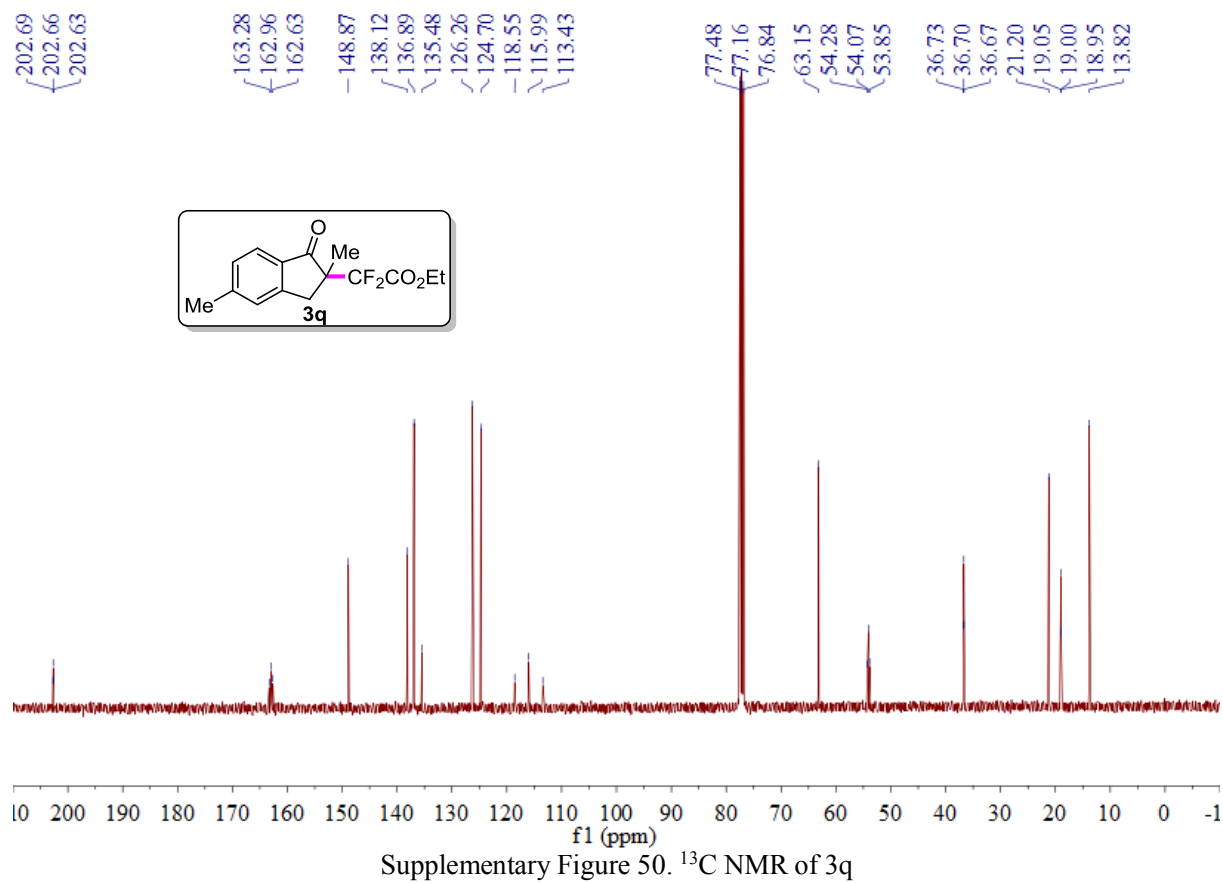

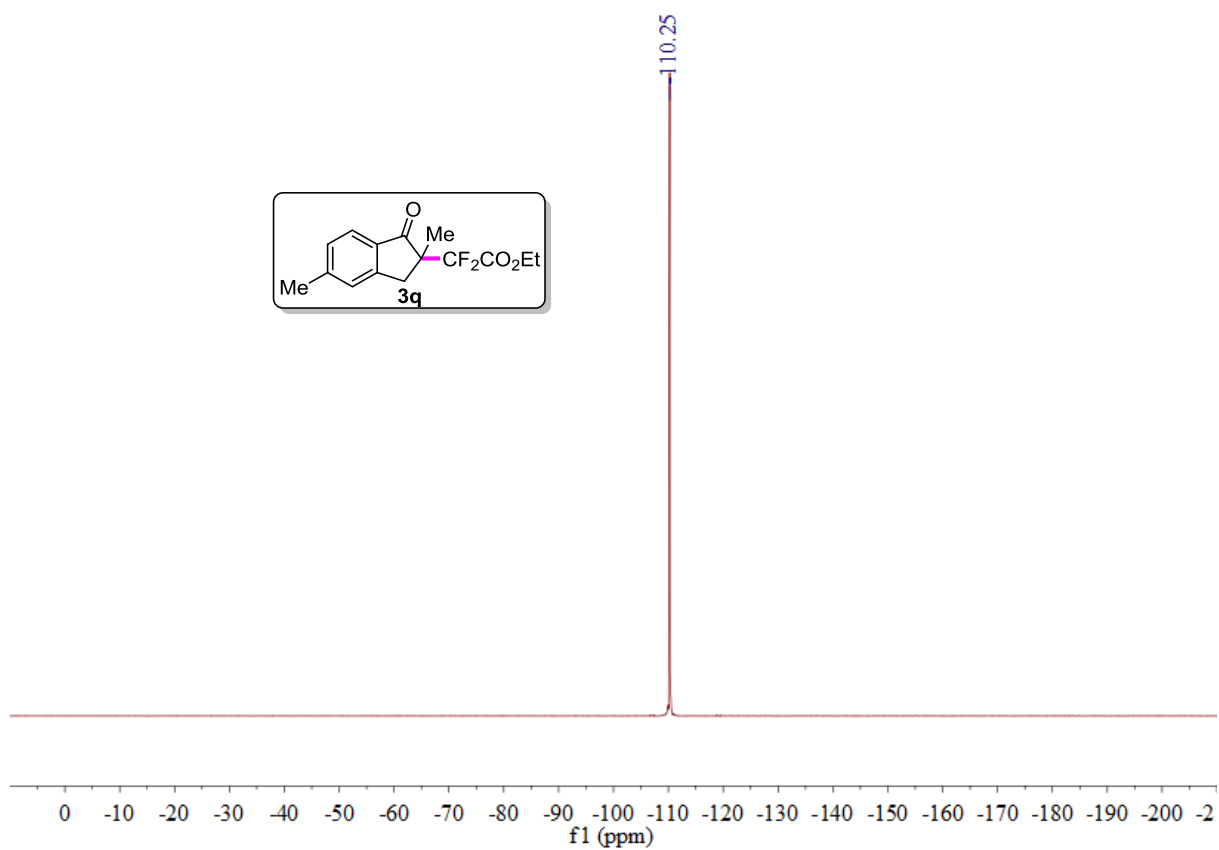

Supplementary Figure 51.  $^{19}\text{F}$  NMR of **3q**

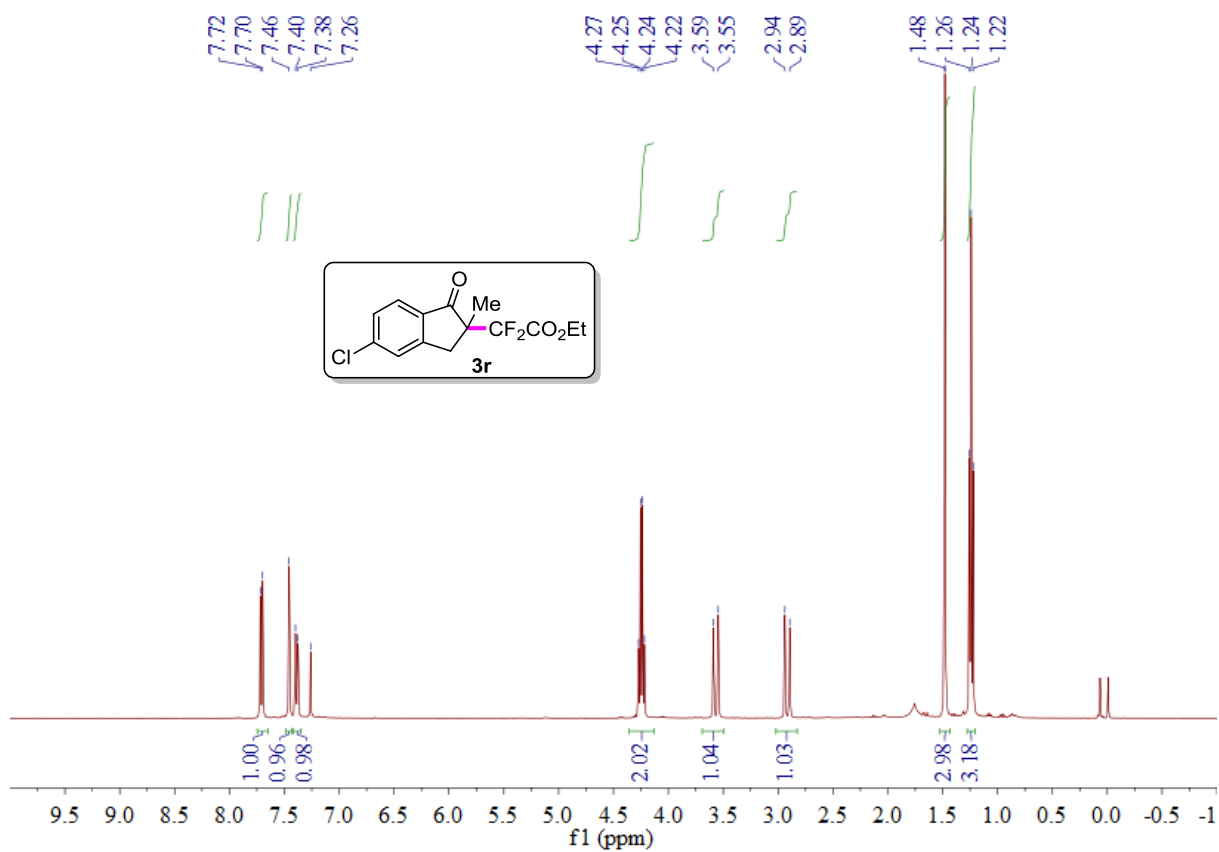

Supplementary Figure 52.  $^1\text{H}$  NMR of **3r**

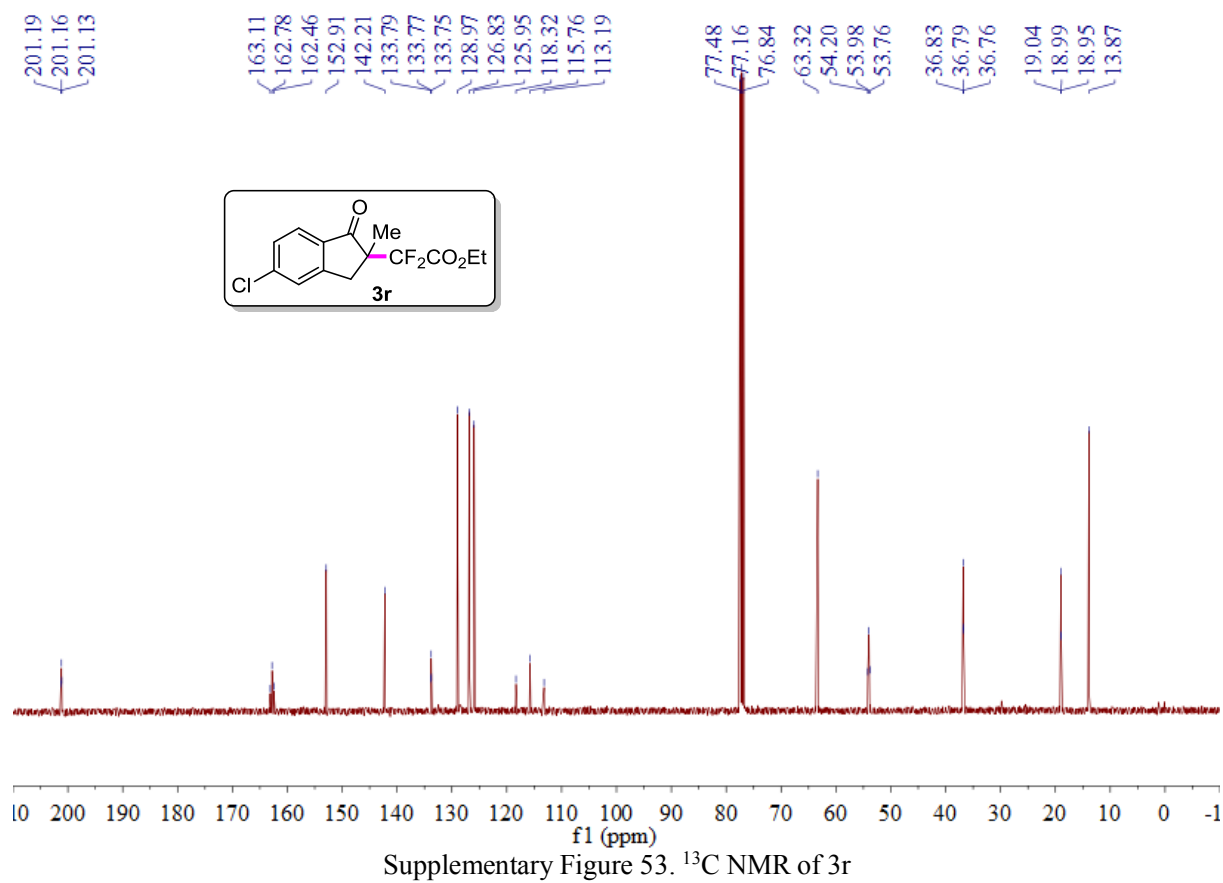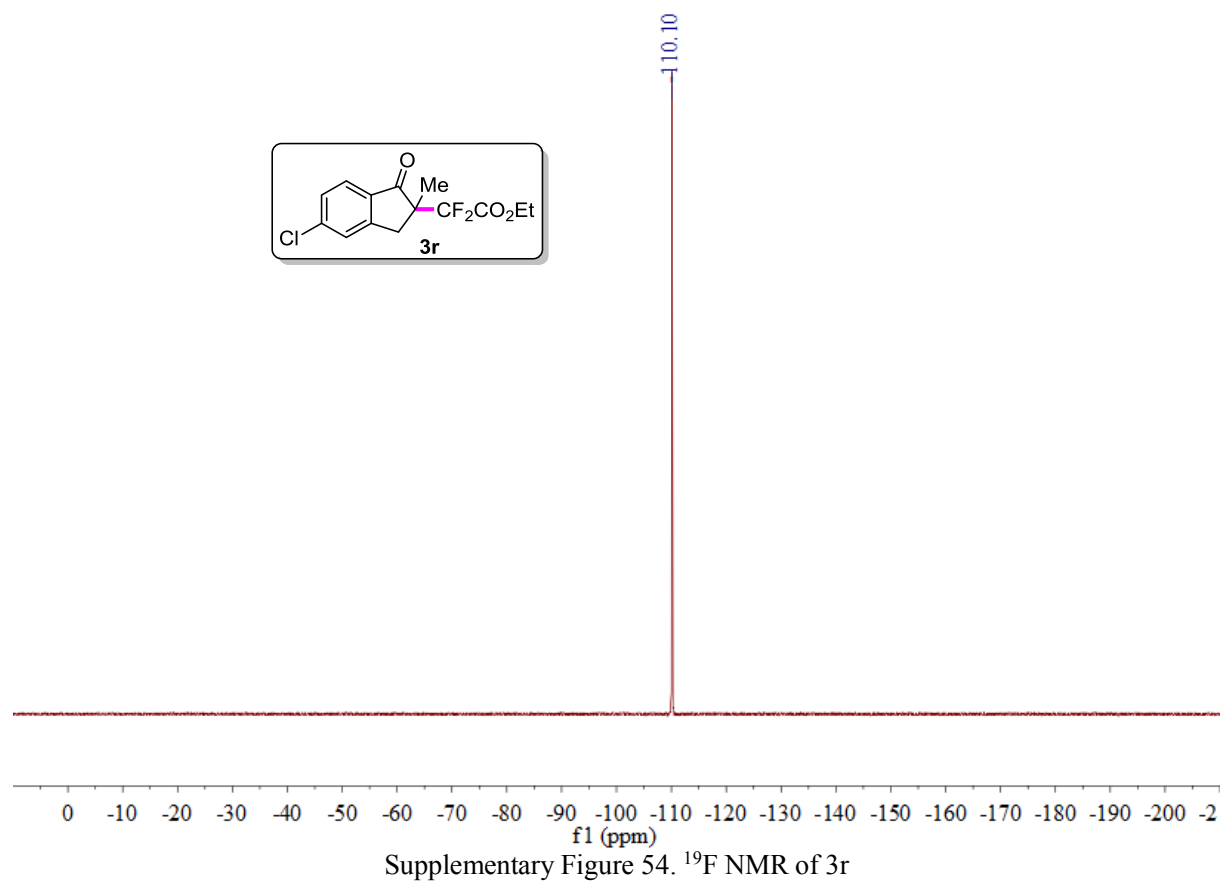

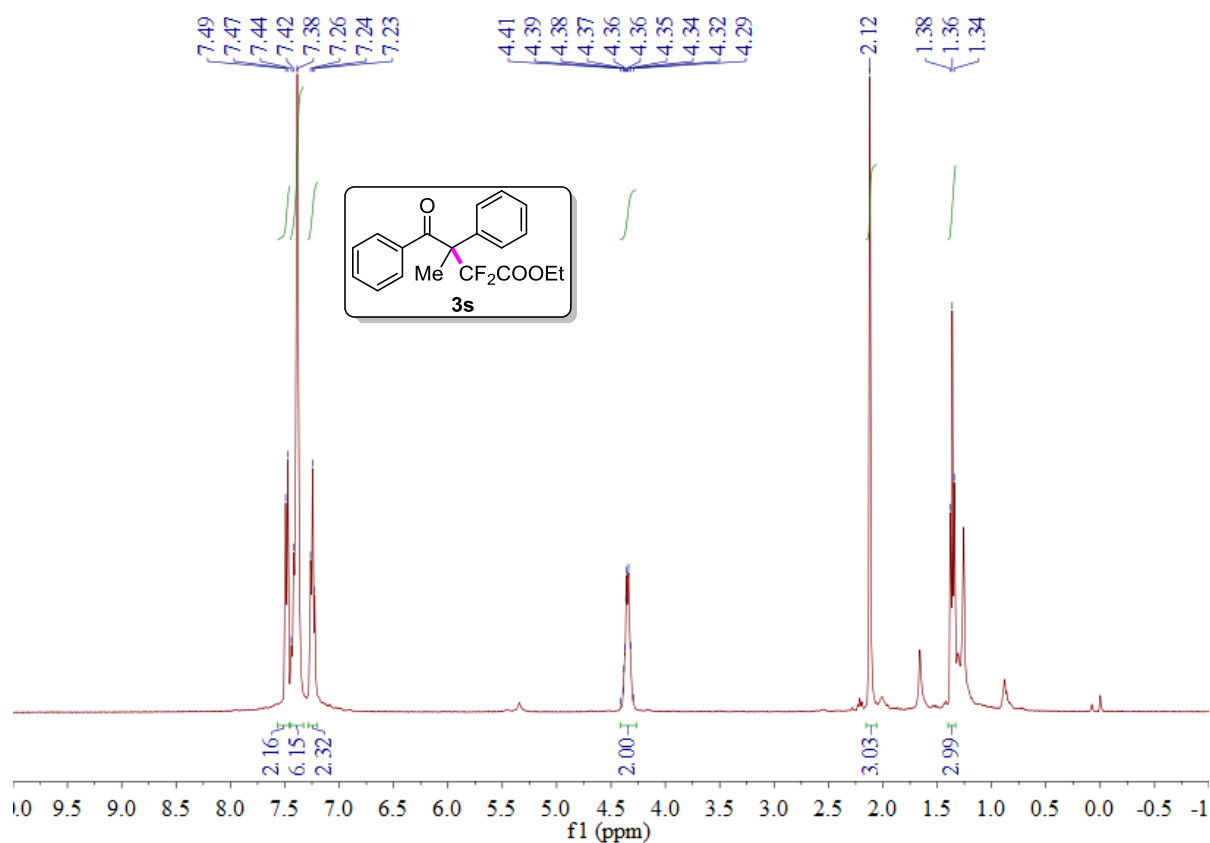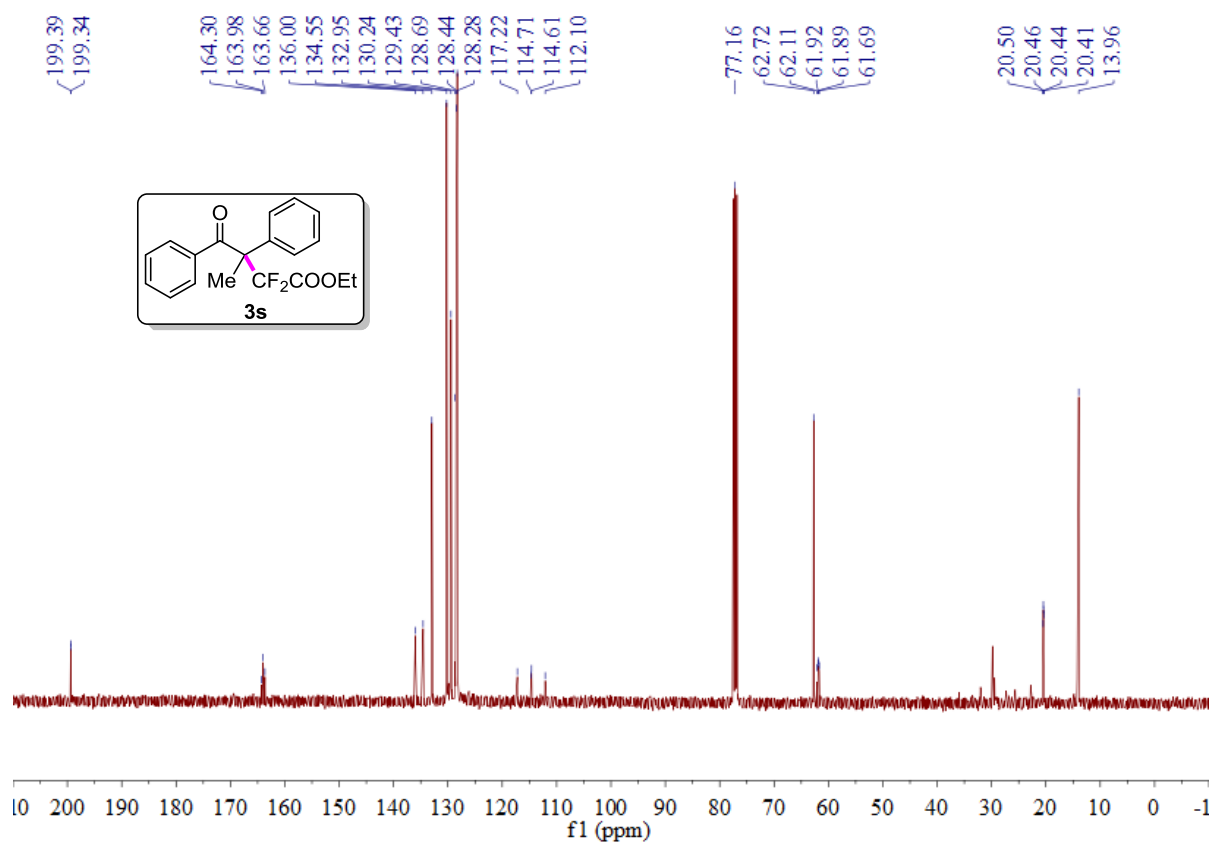

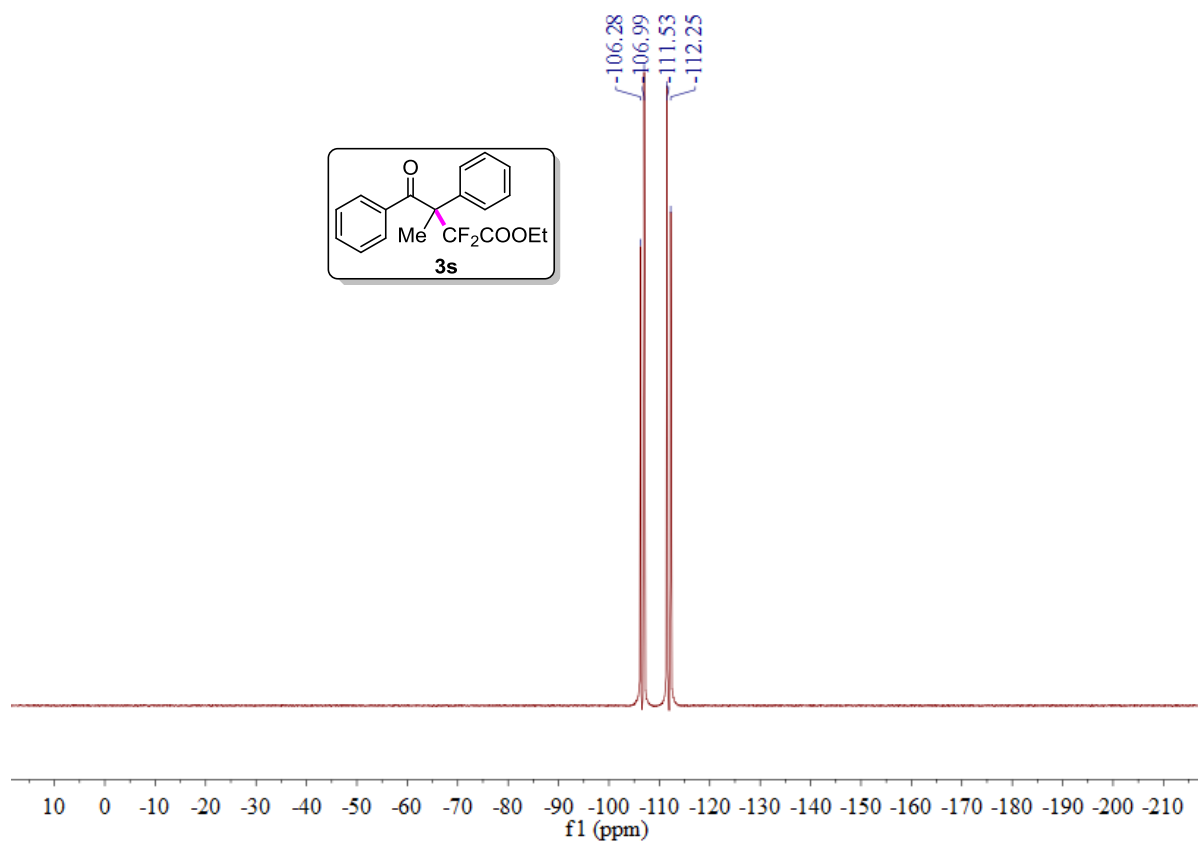

Supplementary Figure 57.  $^{19}\text{F}$  NMR of **3s**

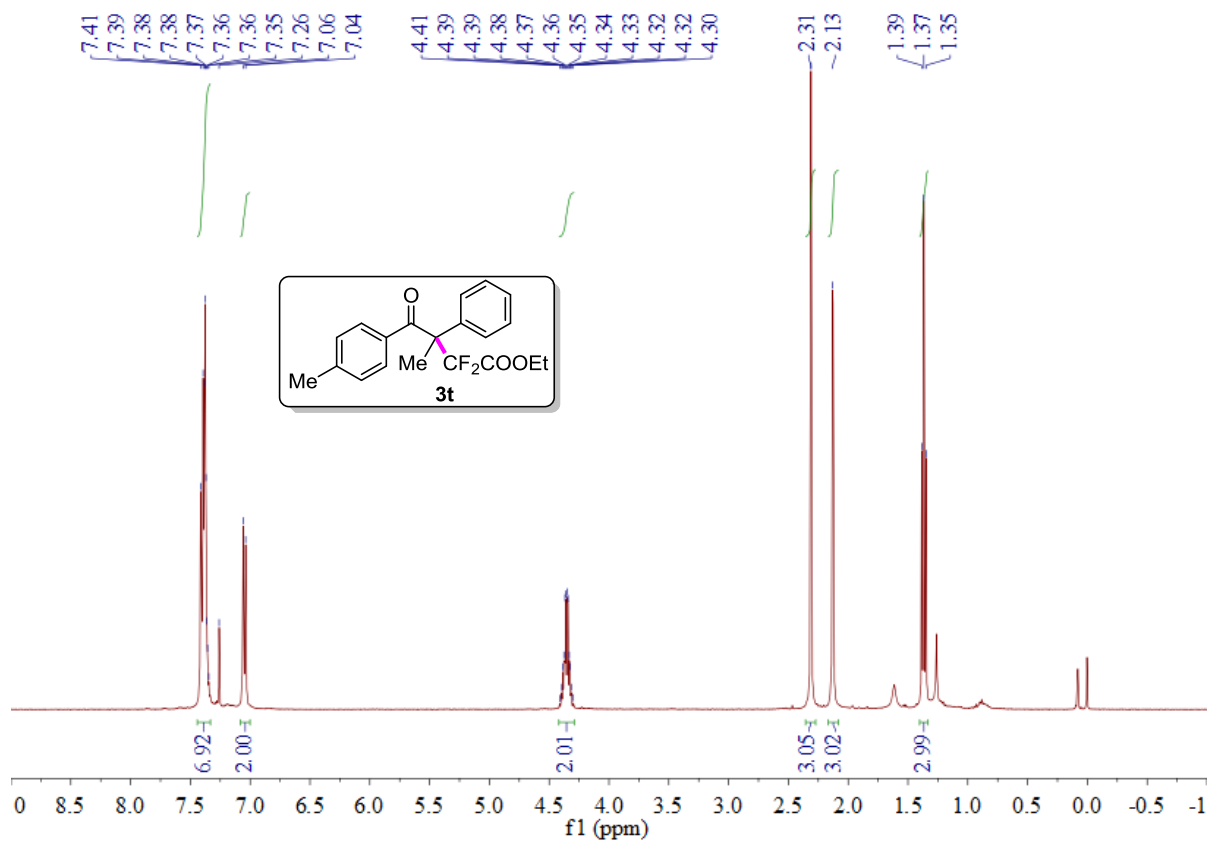

Supplementary Figure 58.  $^1\text{H}$  NMR of **3t**

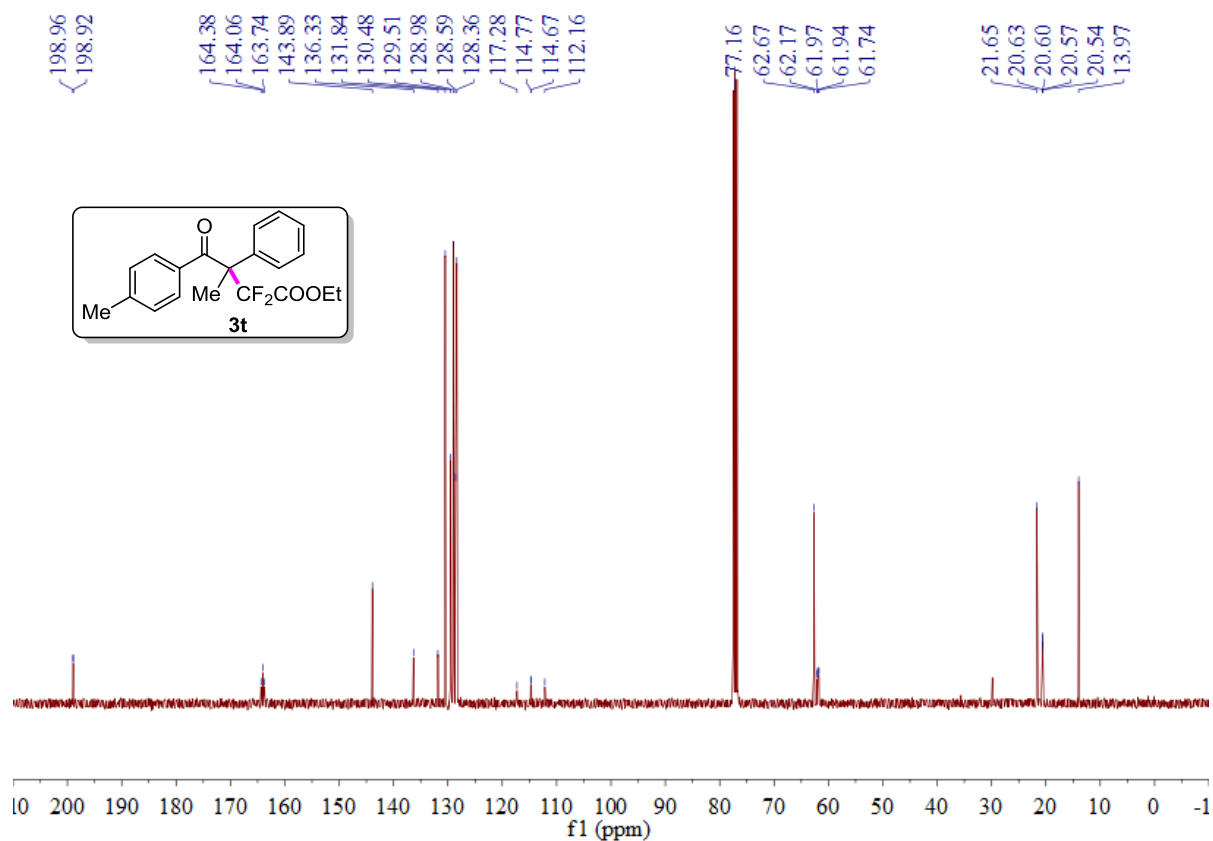

Supplementary Figure 59. <sup>13</sup>C NMR of 3t

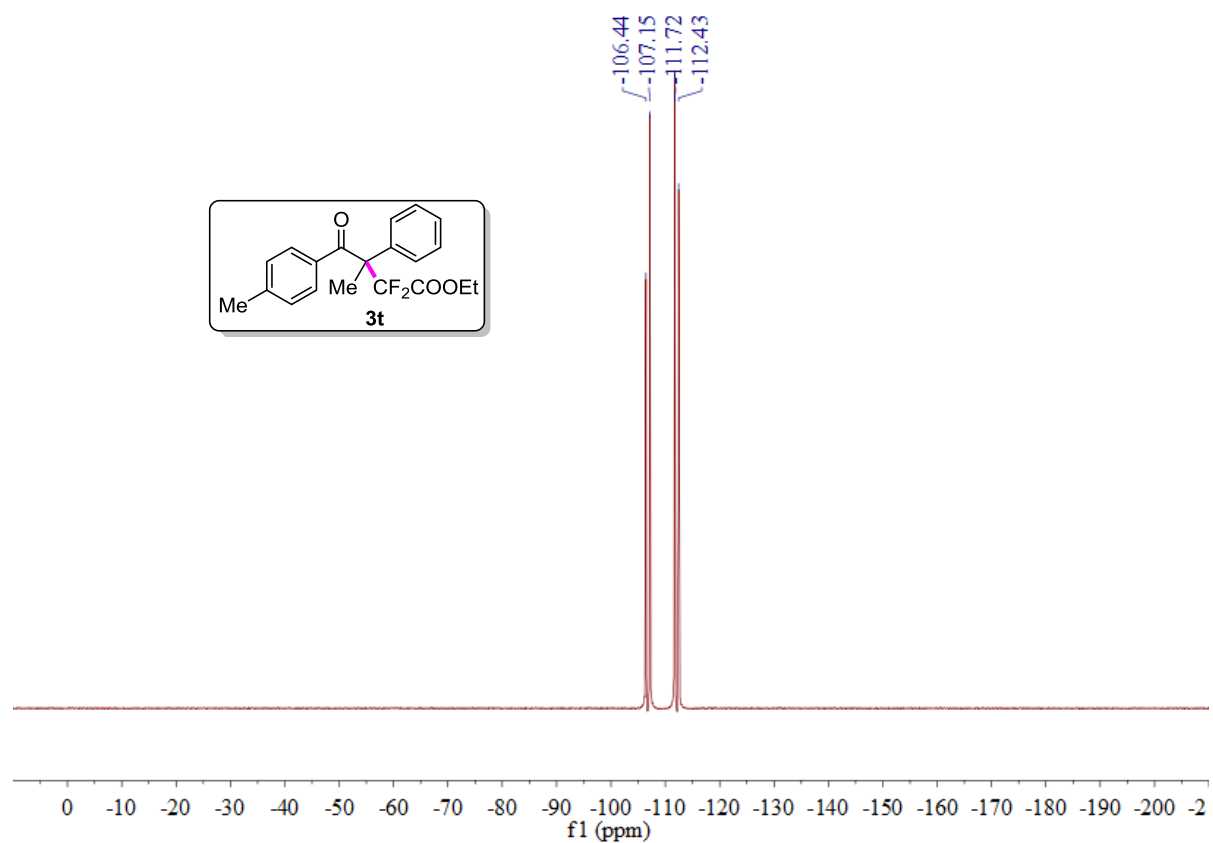

Supplementary Figure 60. <sup>19</sup>F NMR of 3t

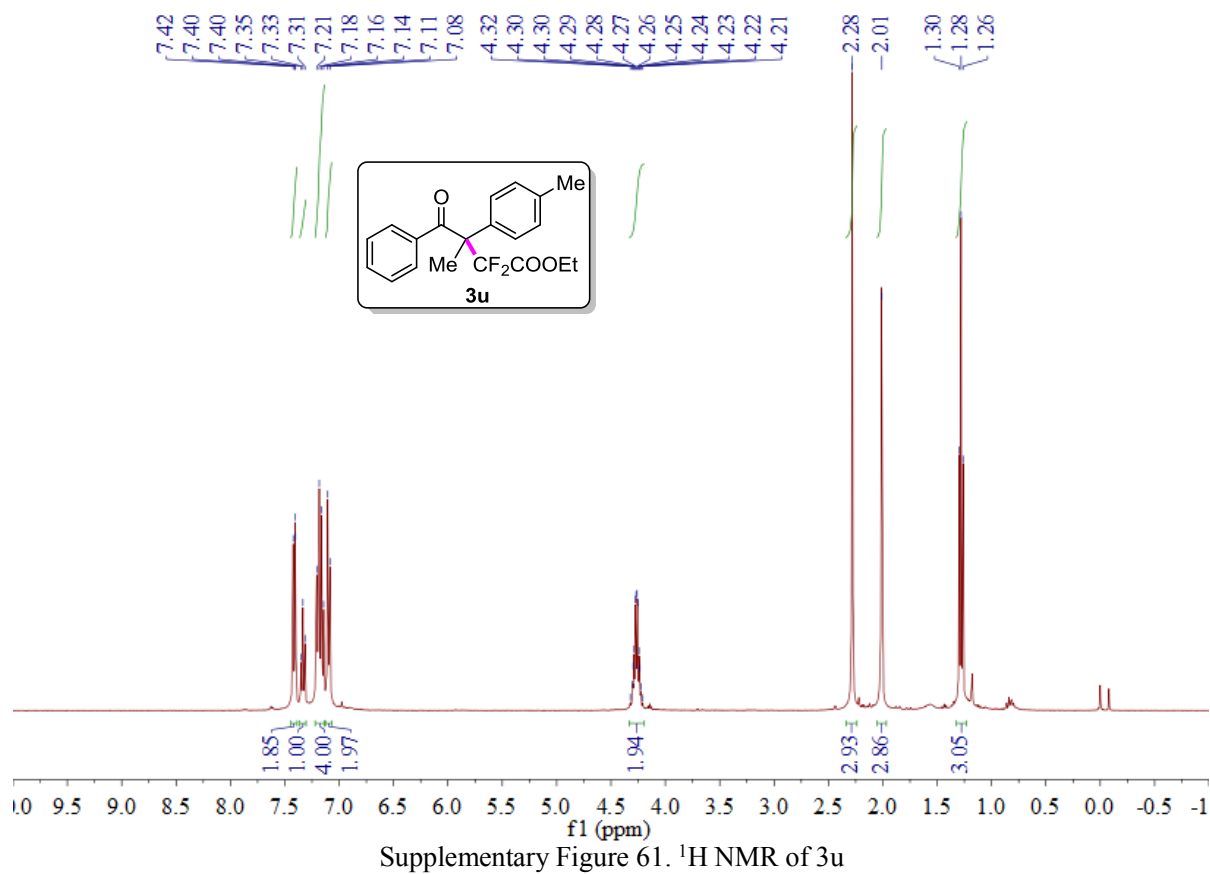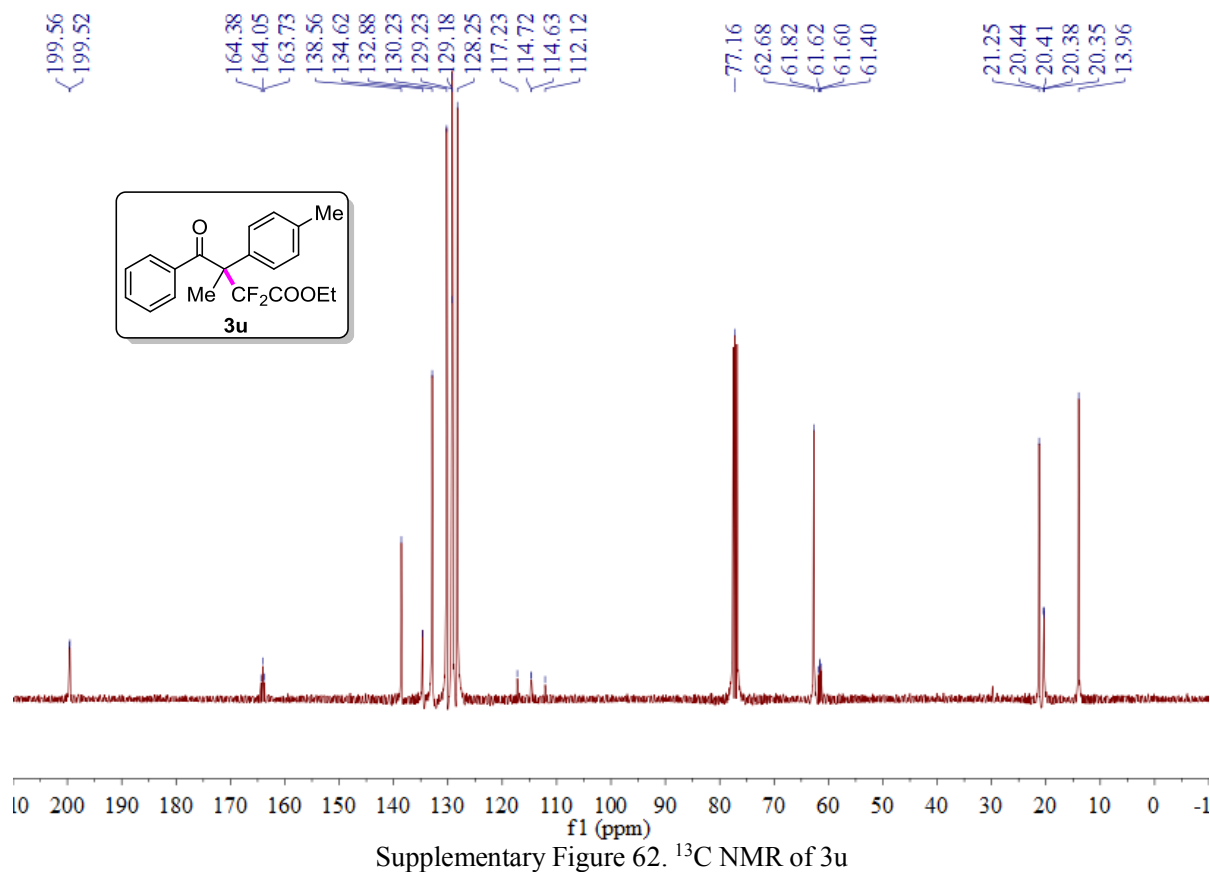



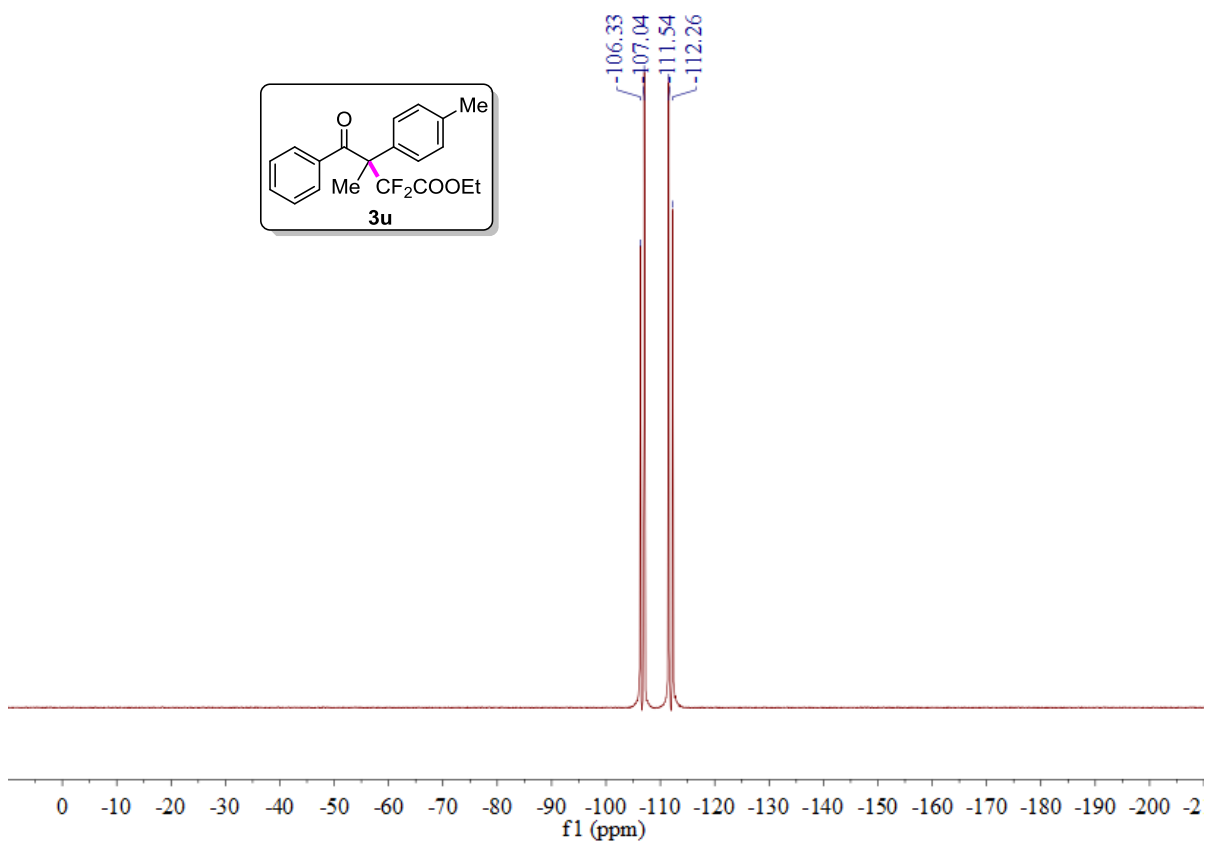

Supplementary Figure 63.  $^{19}\text{F}$  NMR of **3u**

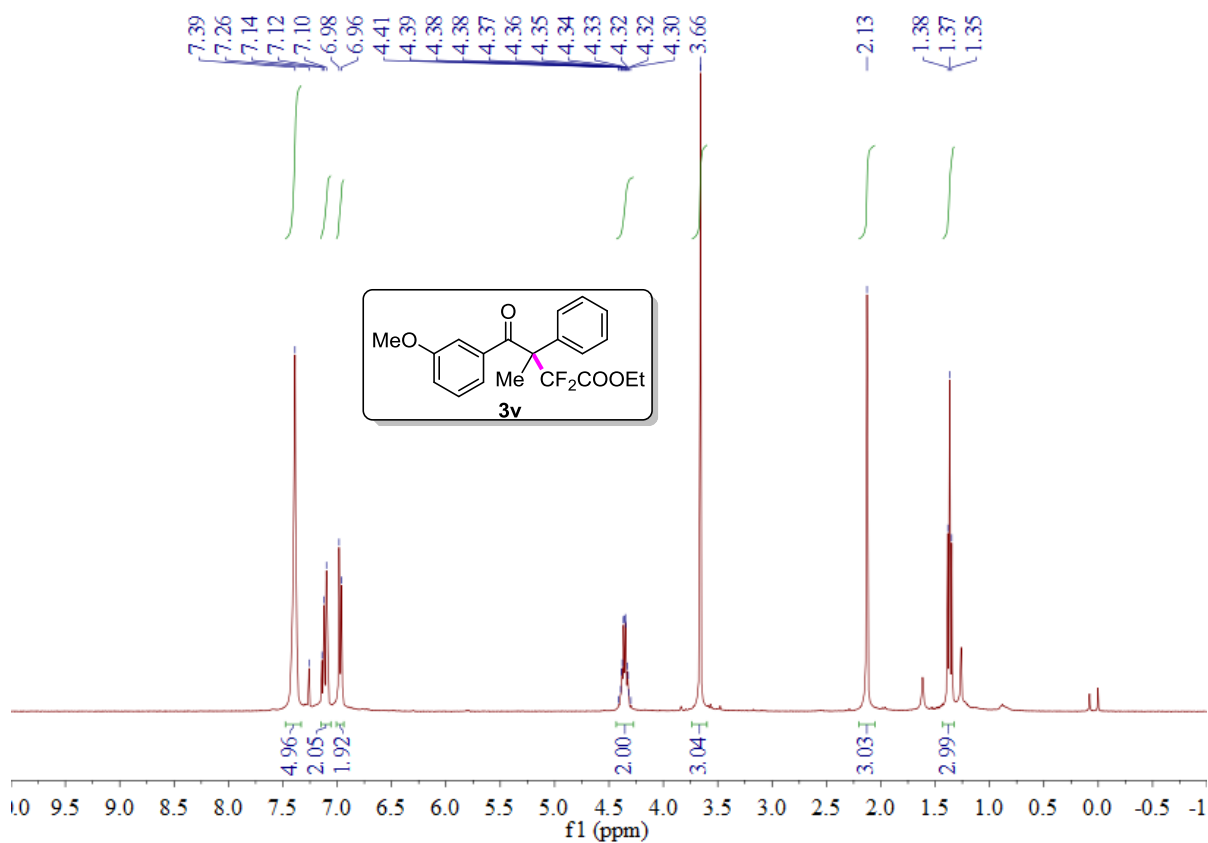

Supplementary Figure 64.  $^1\text{H}$  NMR of **3v**

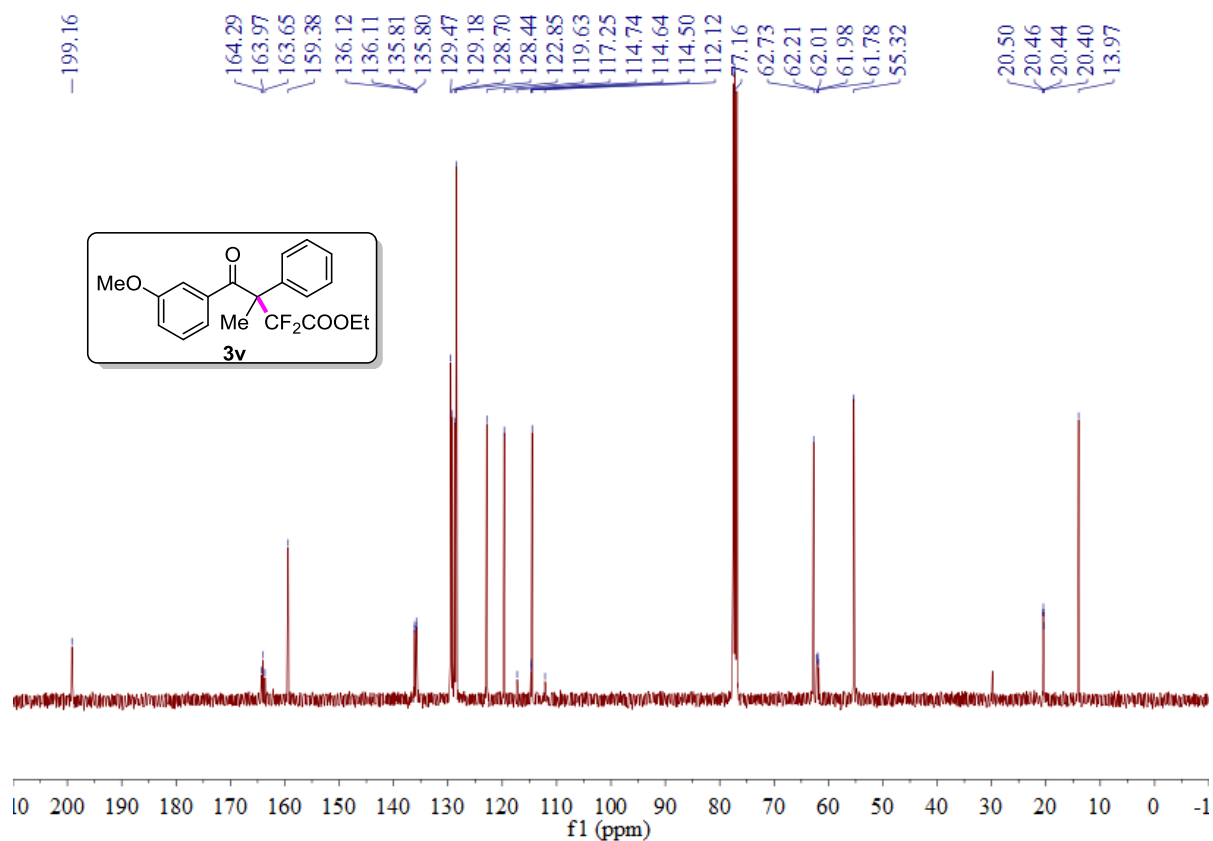

Supplementary Figure 65.  $^{13}\text{C}$  NMR of **3v**

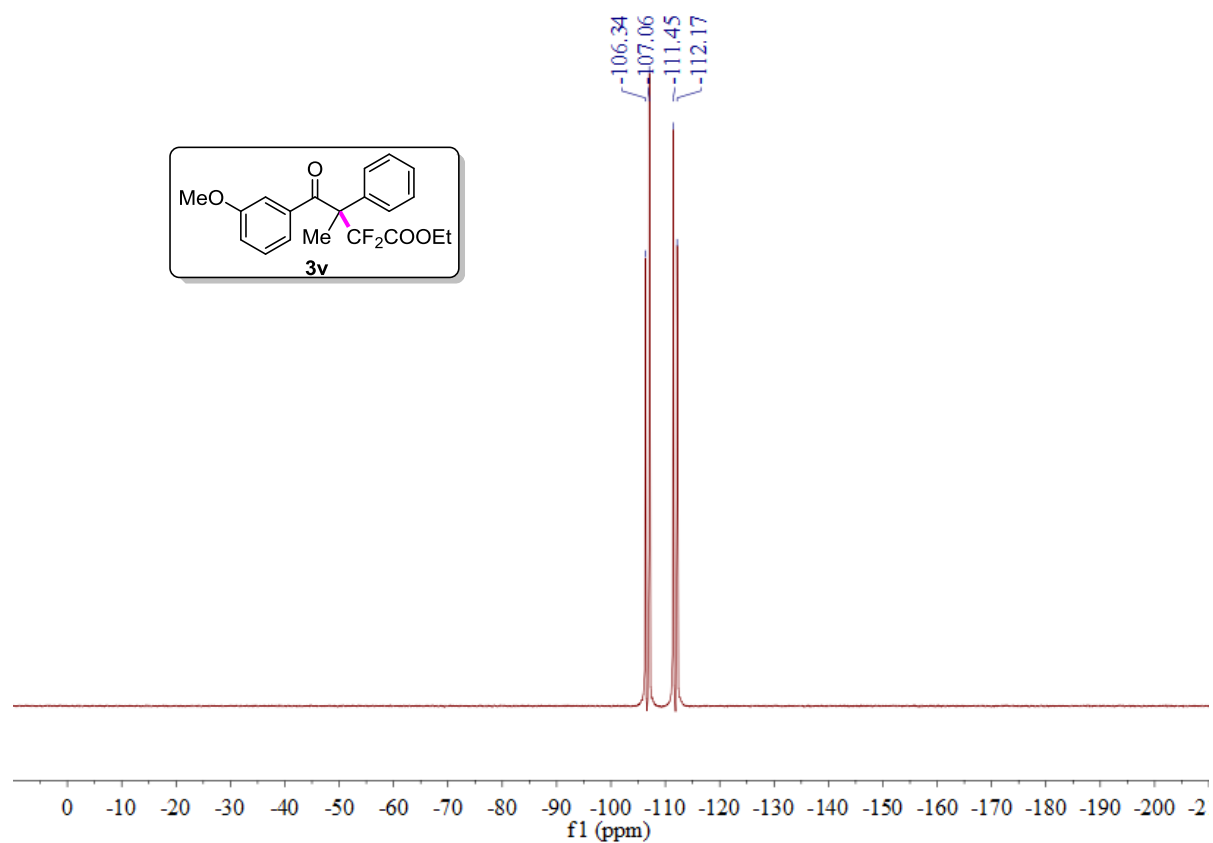

Supplementary Figure 66.  $^{19}\text{F}$  NMR of **3v**

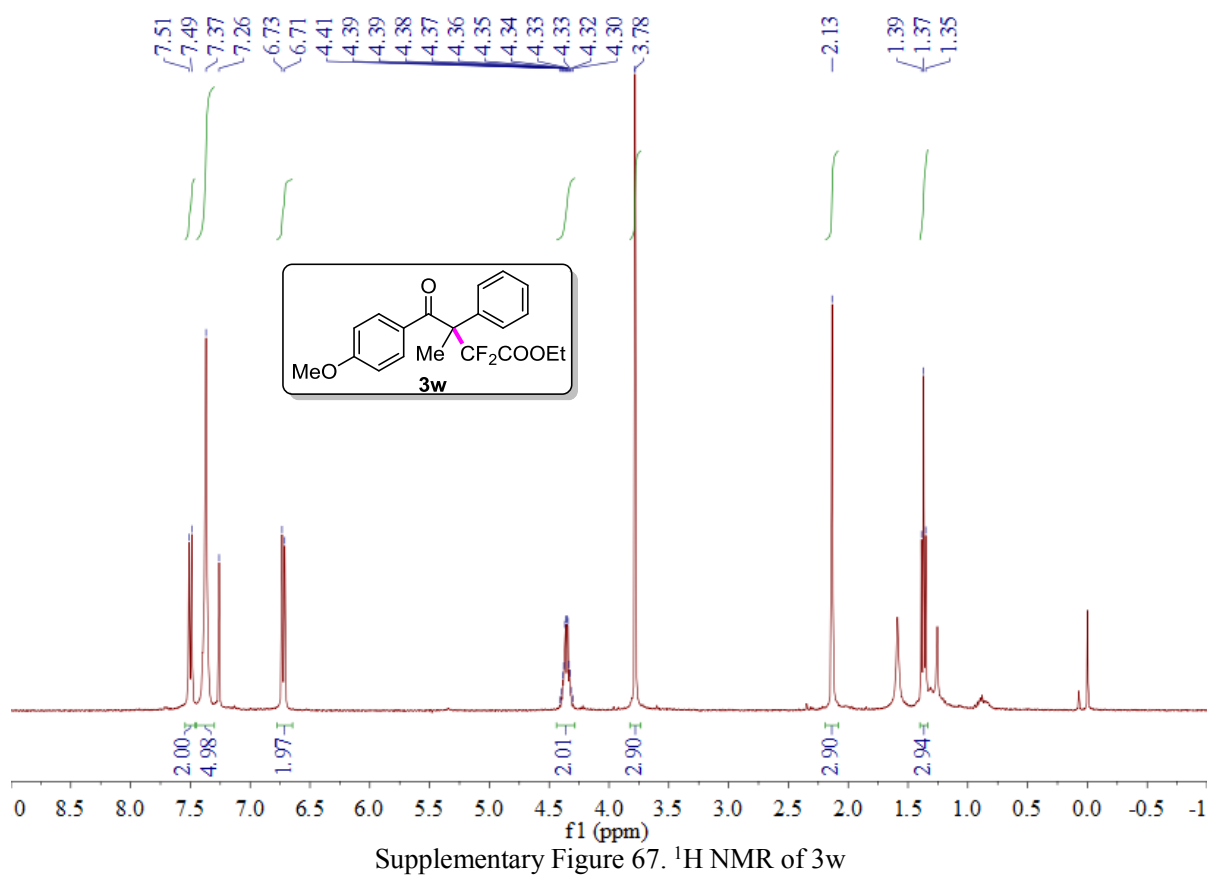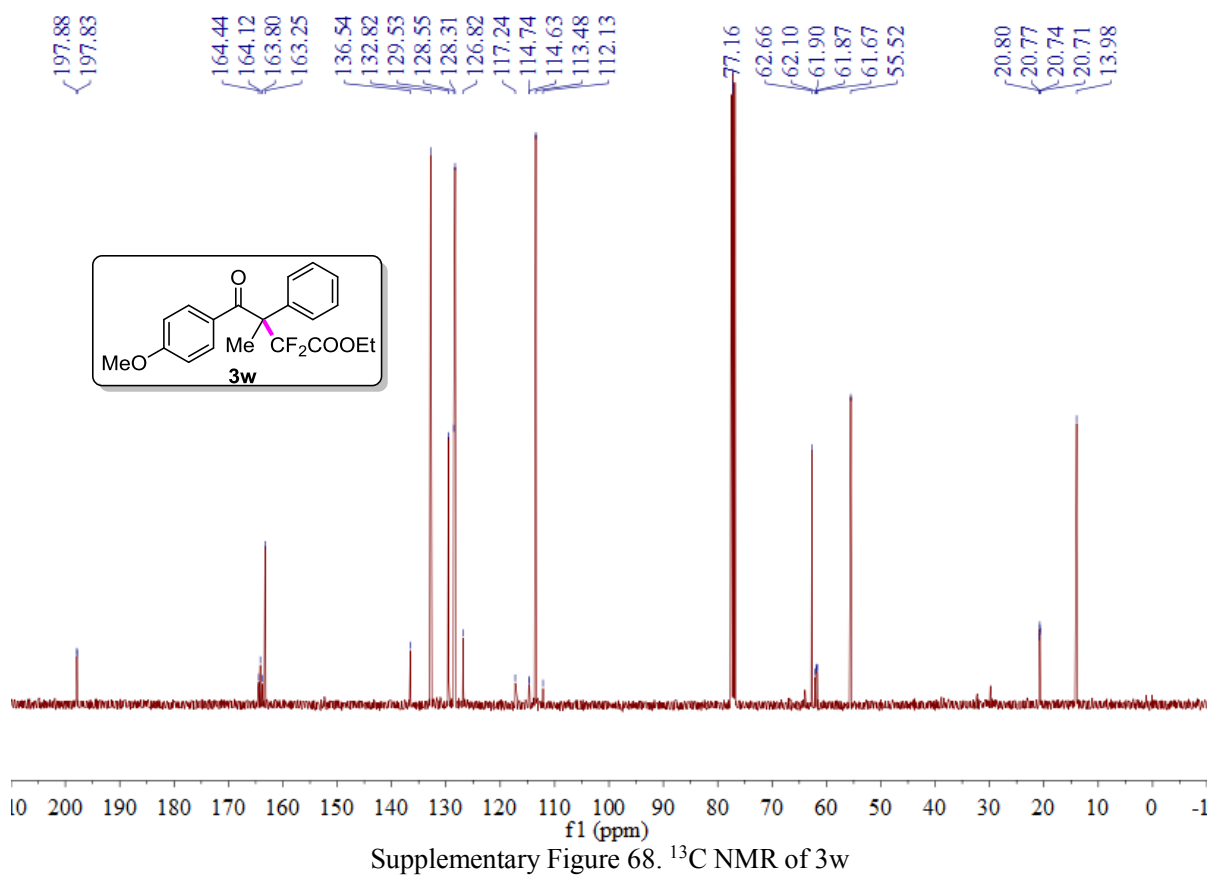

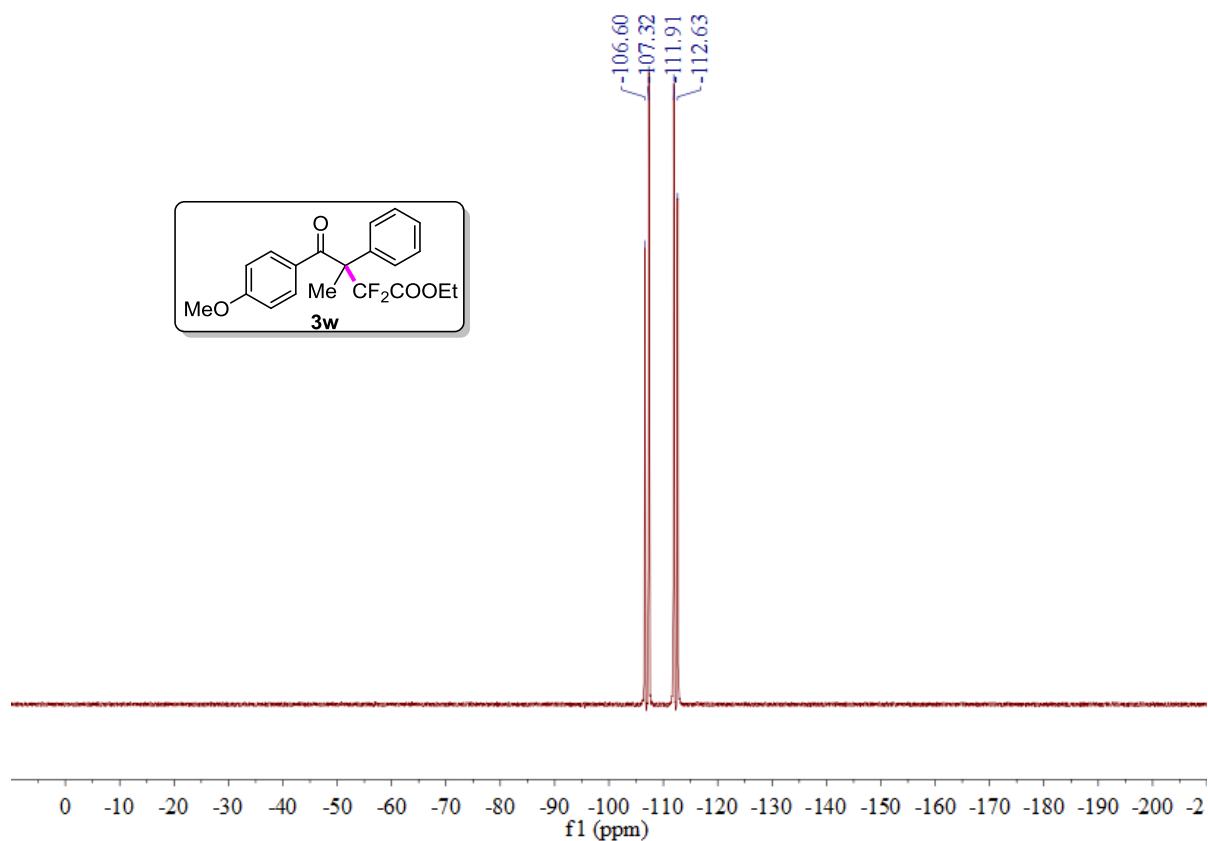

Supplementary Figure 69.  $^{19}\text{F}$  NMR of **3w**

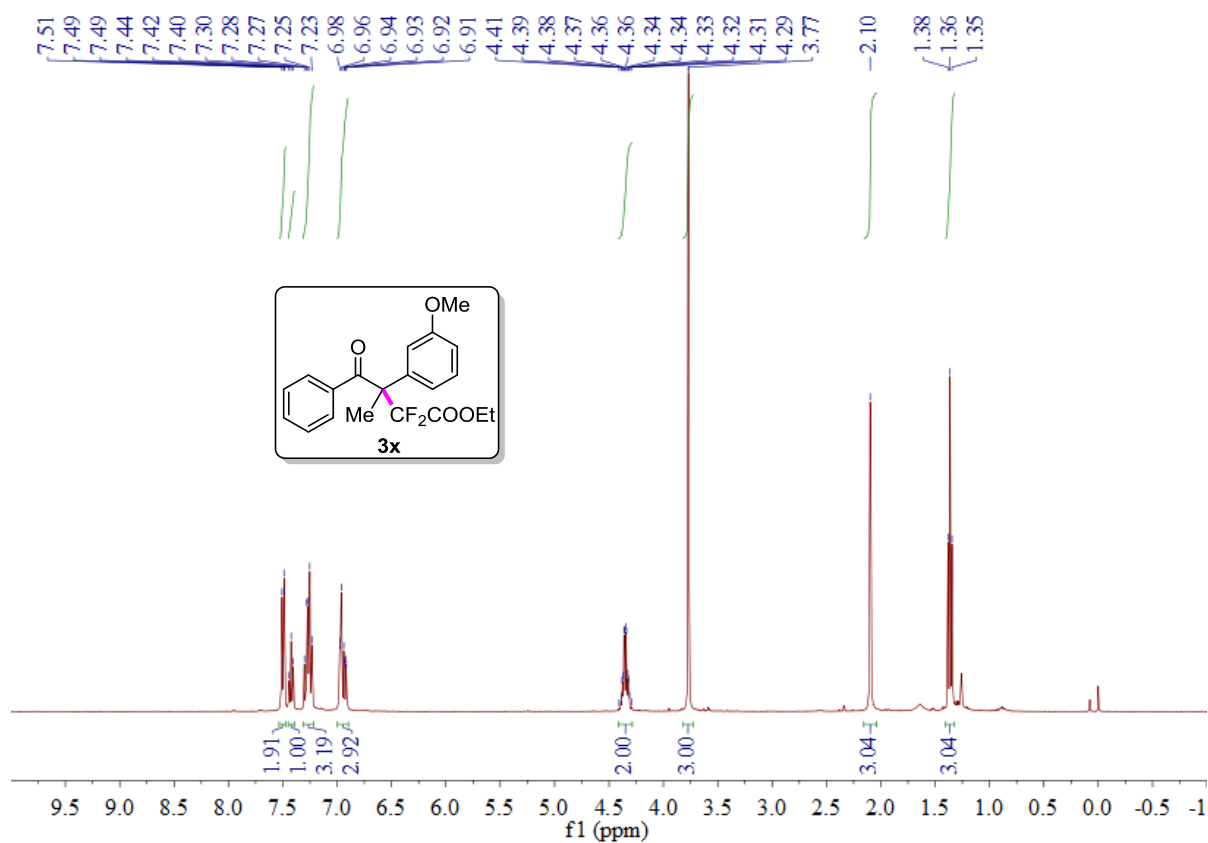

Supplementary Figure 70.  $^1\text{H}$  NMR of **3x**

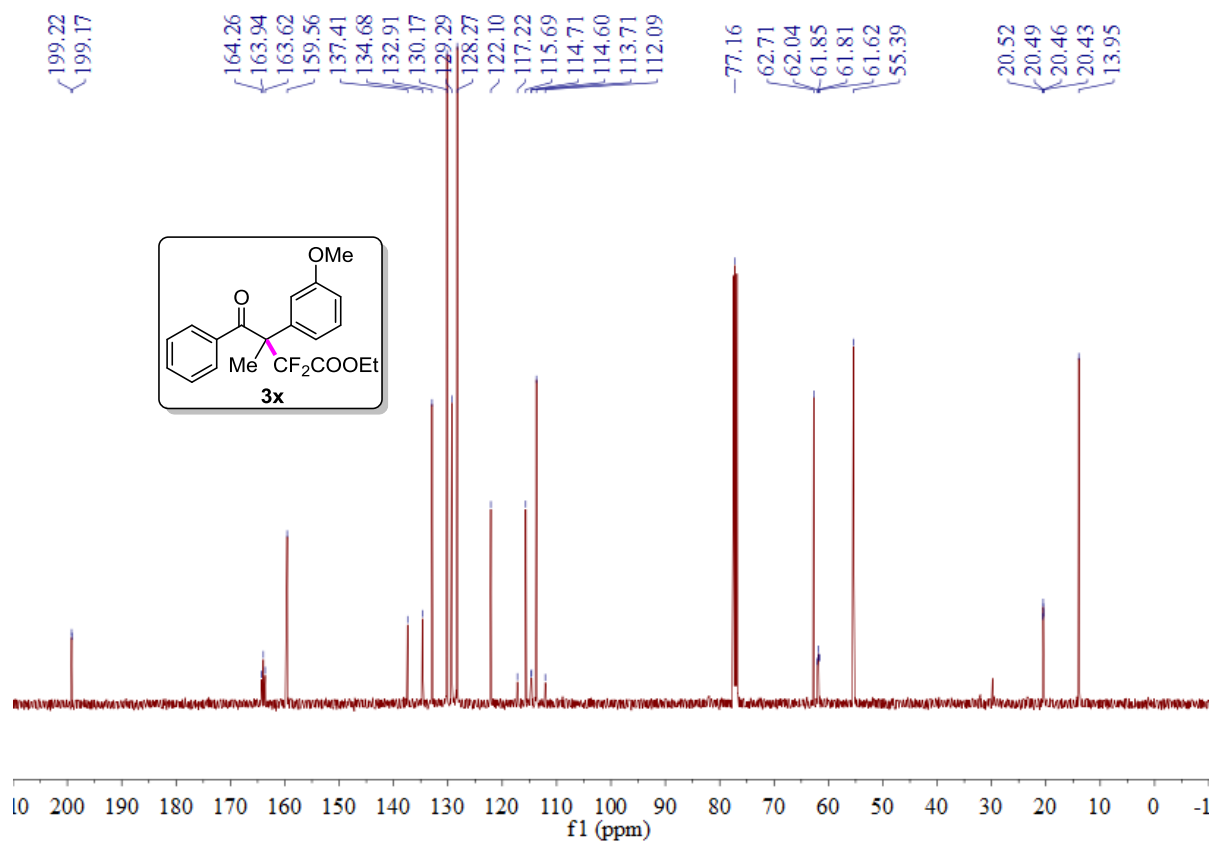

Supplementary Figure 71.  $^{13}\text{C}$  NMR of **3x**

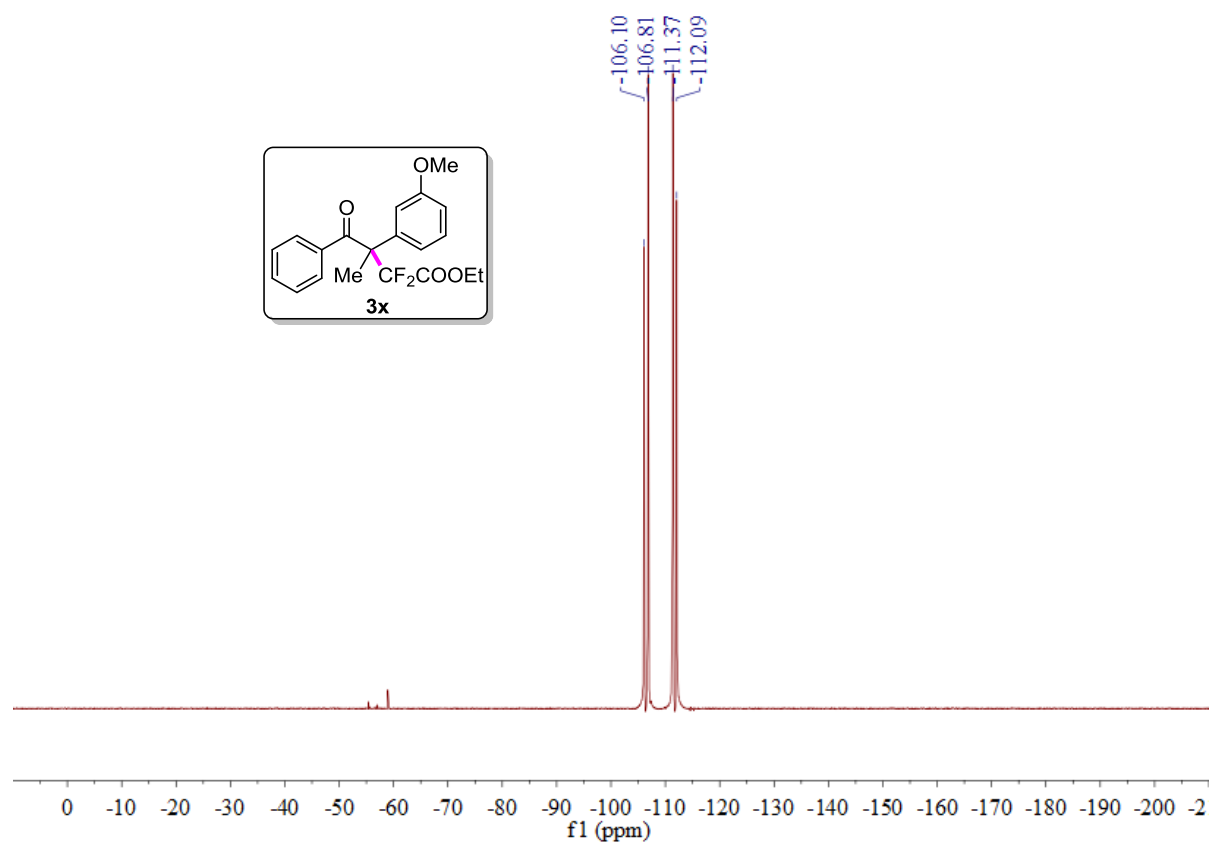

Supplementary Figure 72.  $^{19}\text{F}$  NMR of **3x**

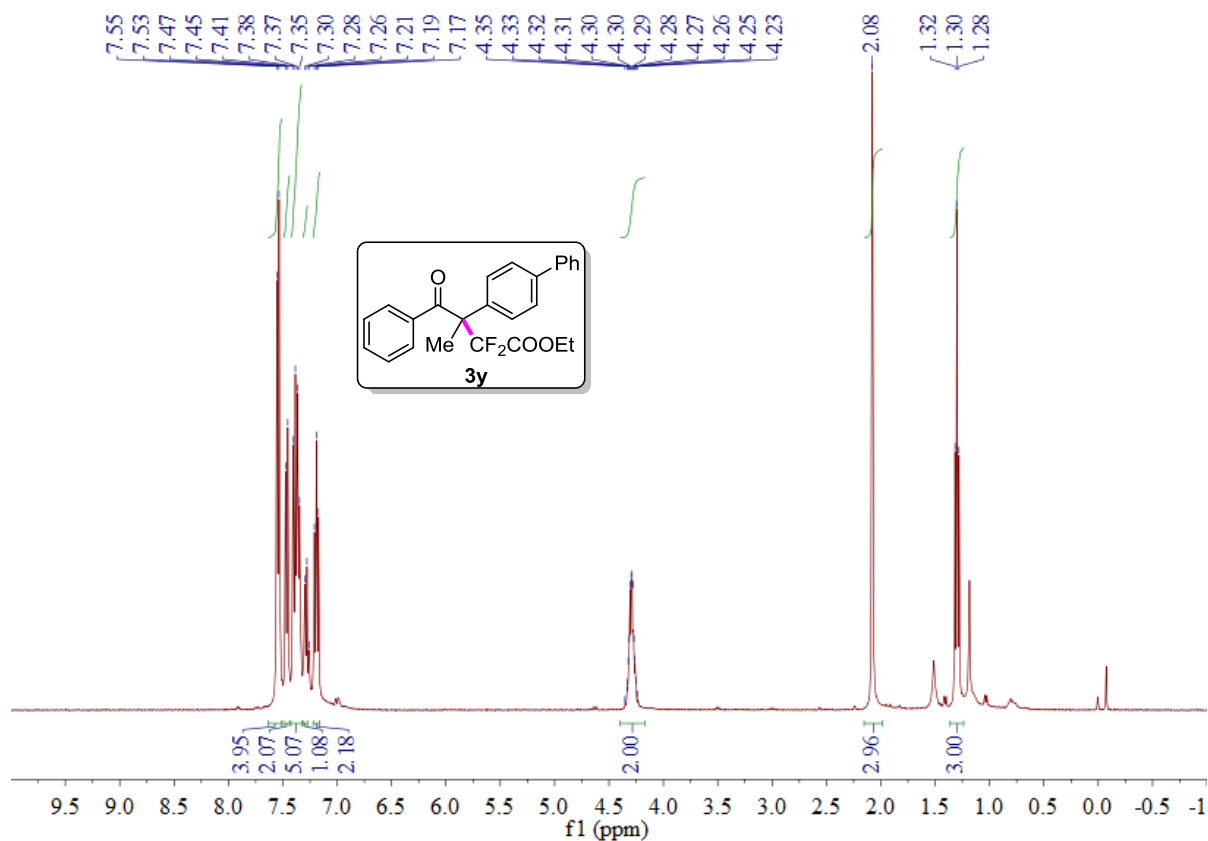

Supplementary Figure 73.  $^1\text{H}$  NMR of **3y**

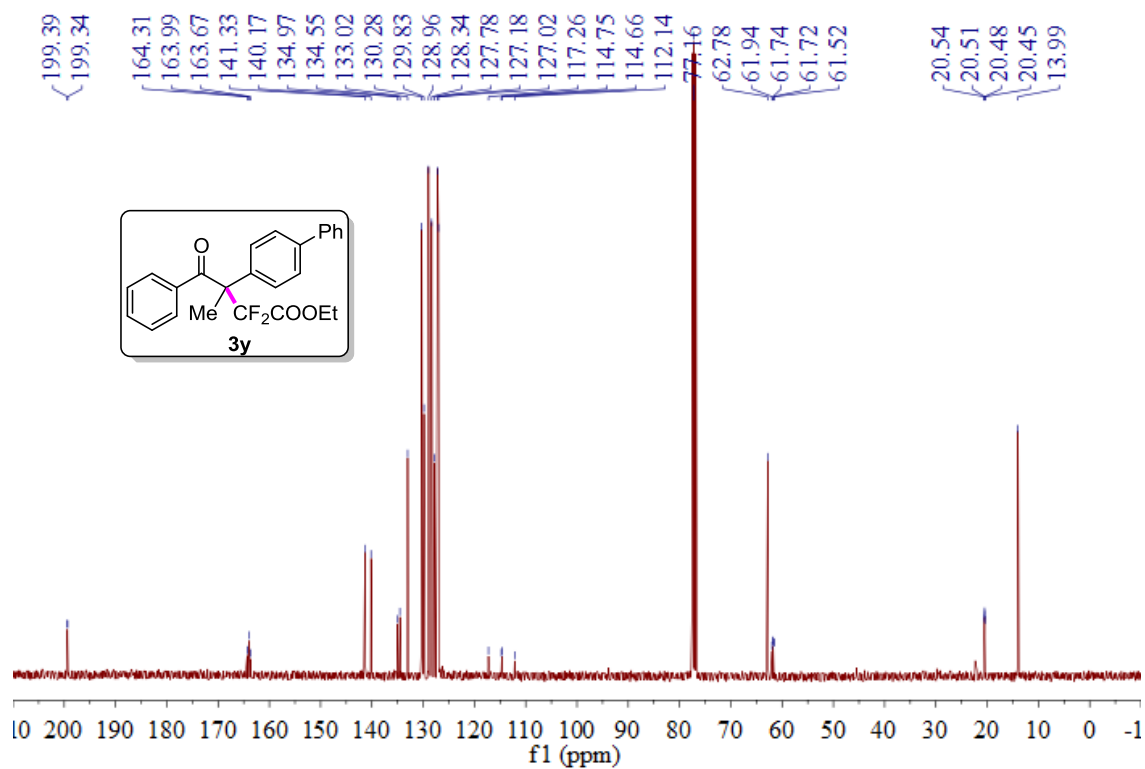

Supplementary Figure 74.  $^{13}\text{C}$  NMR of **3y**

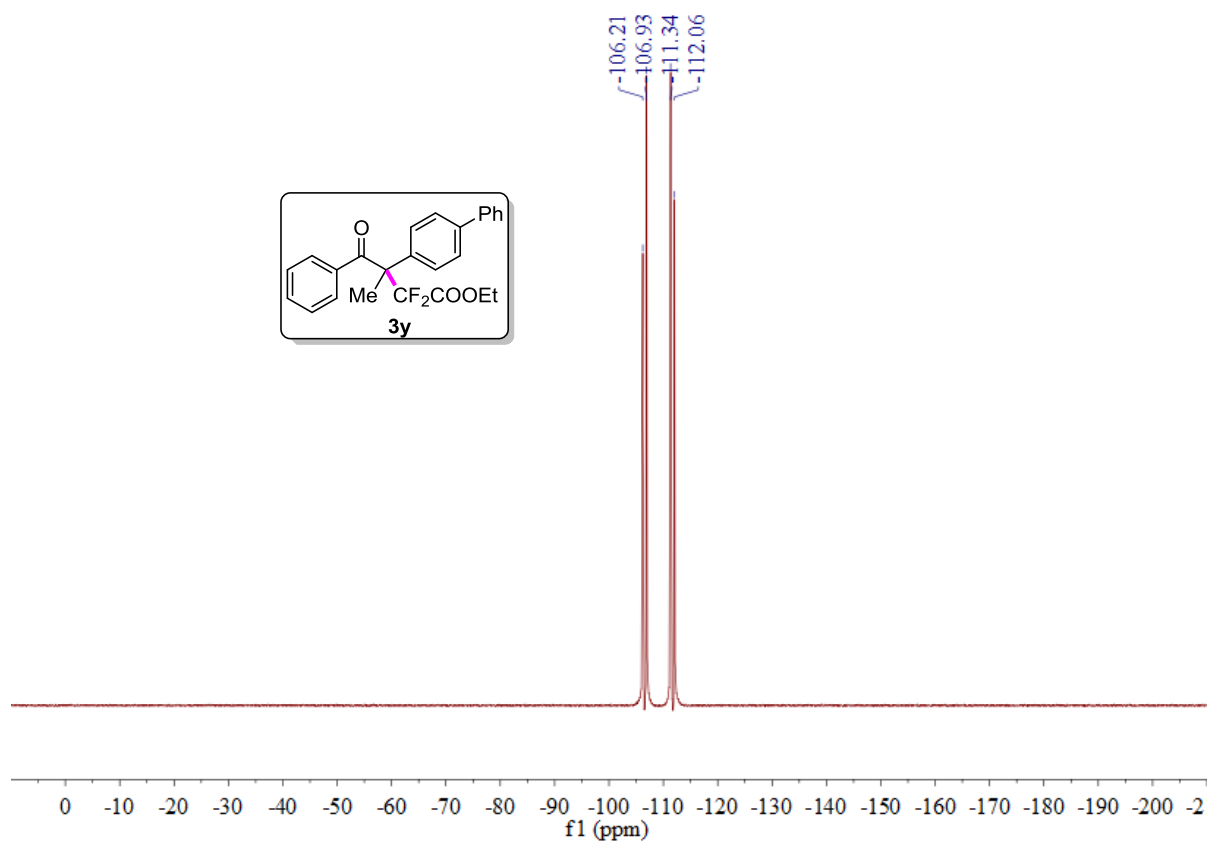

Supplementary Figure 75.  $^{19}\text{F}$  NMR of **3y**

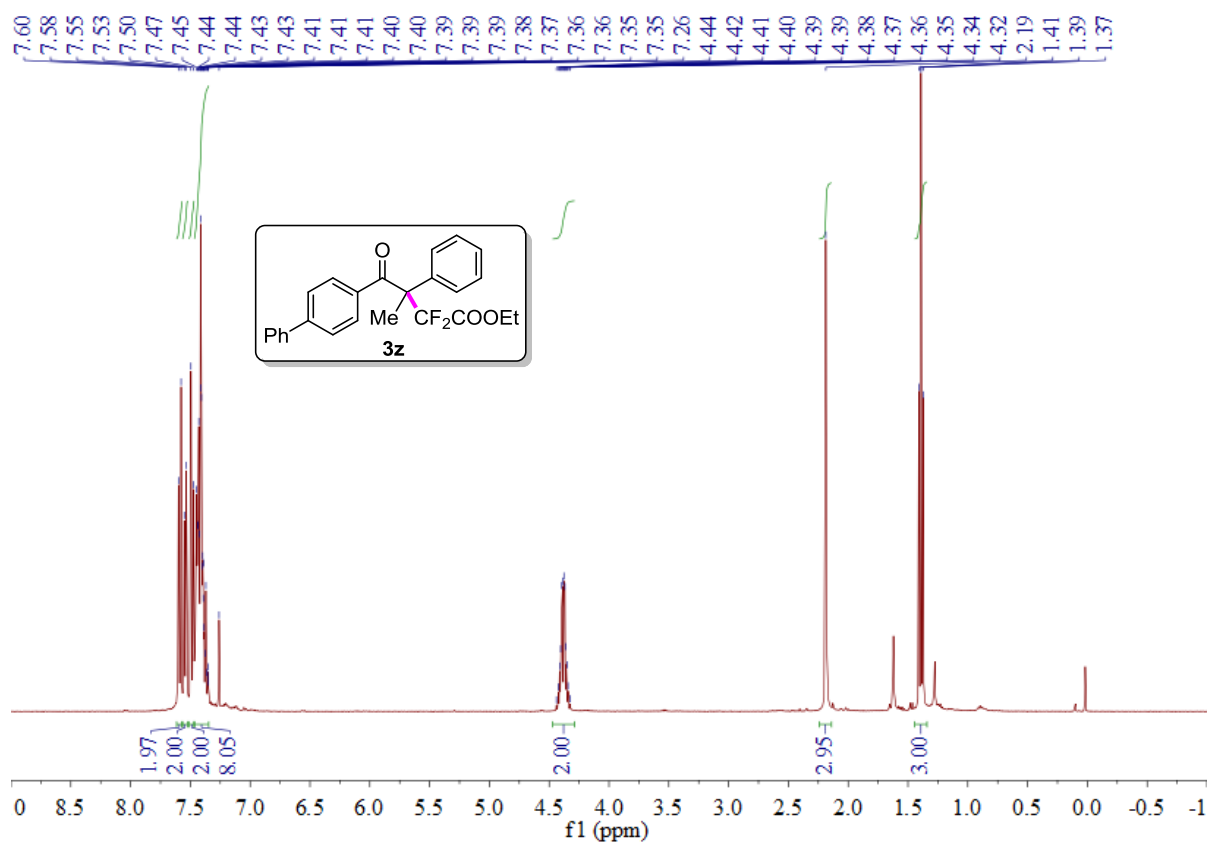

Supplementary Figure 76.  $^1\text{H}$  NMR of **3z**

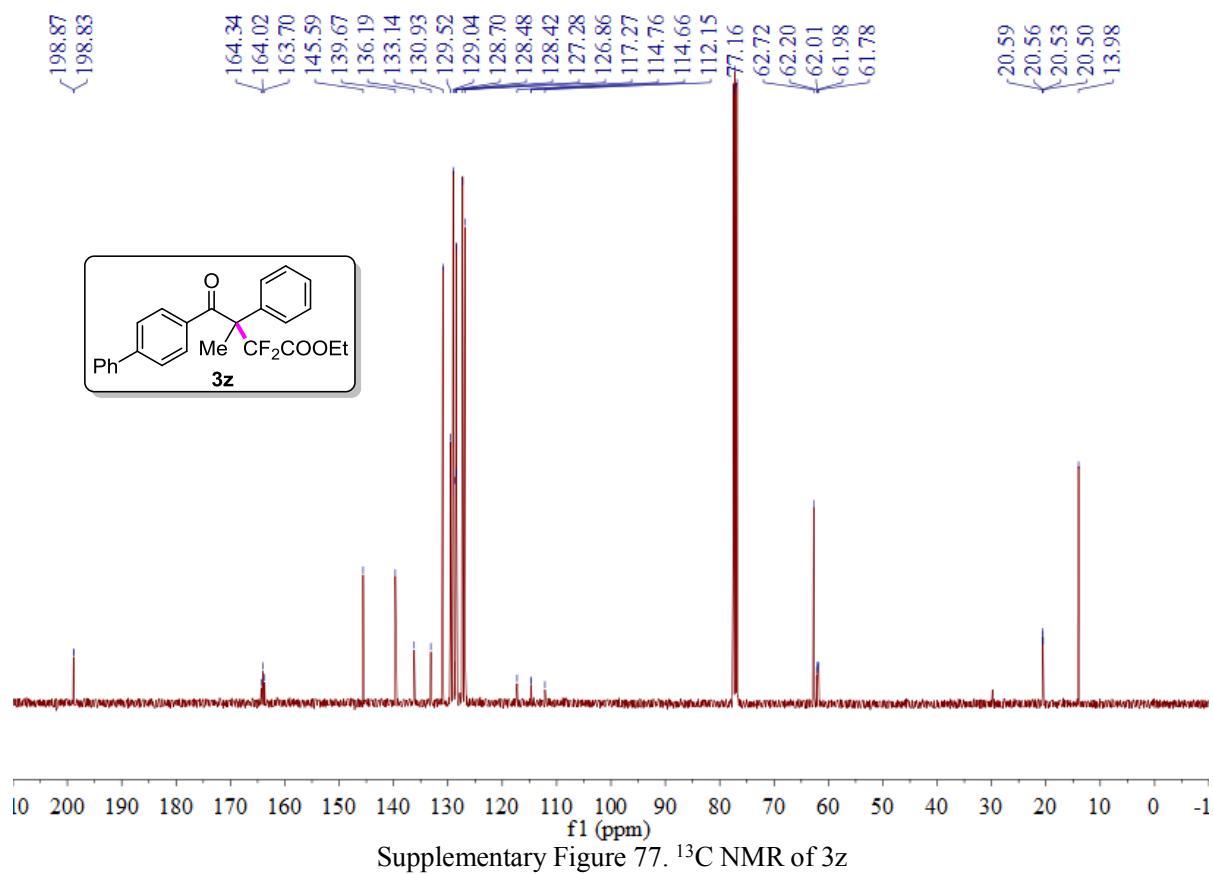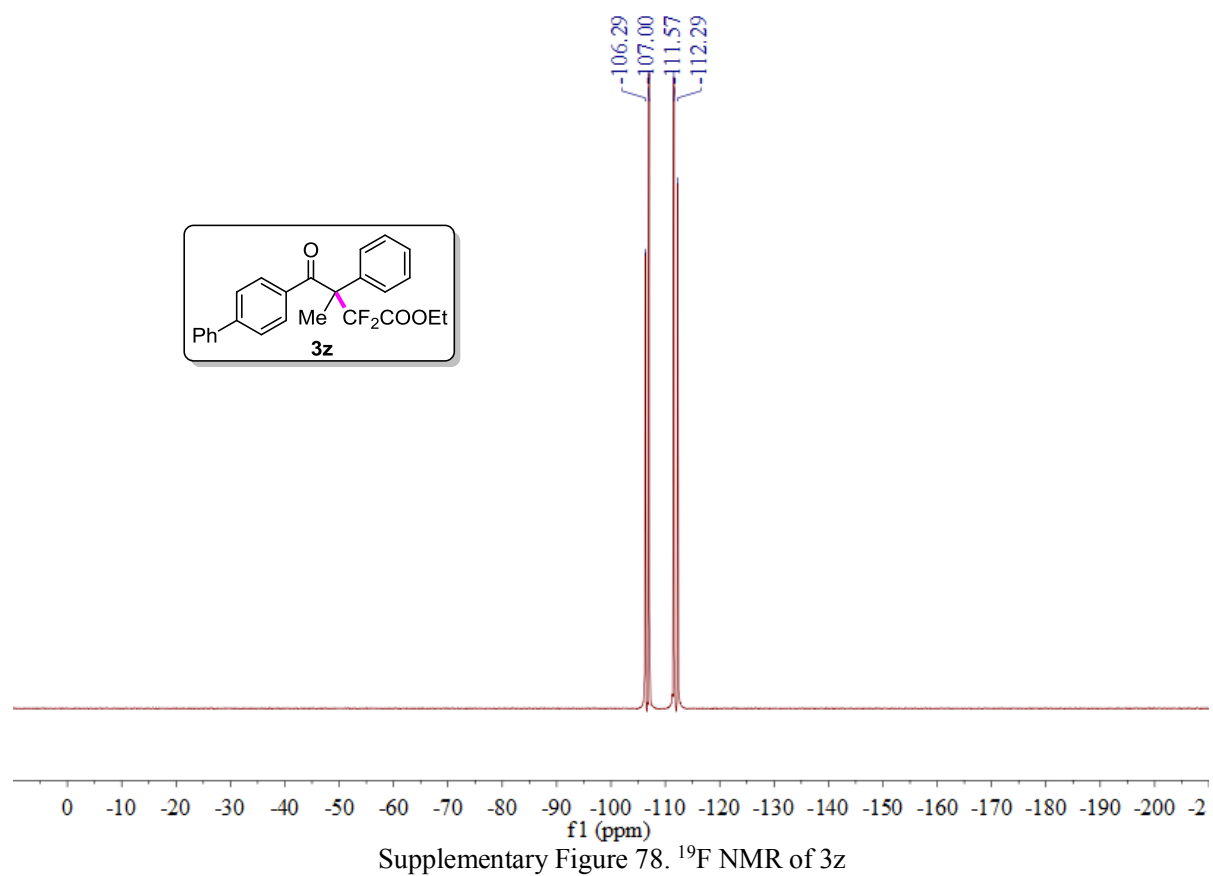



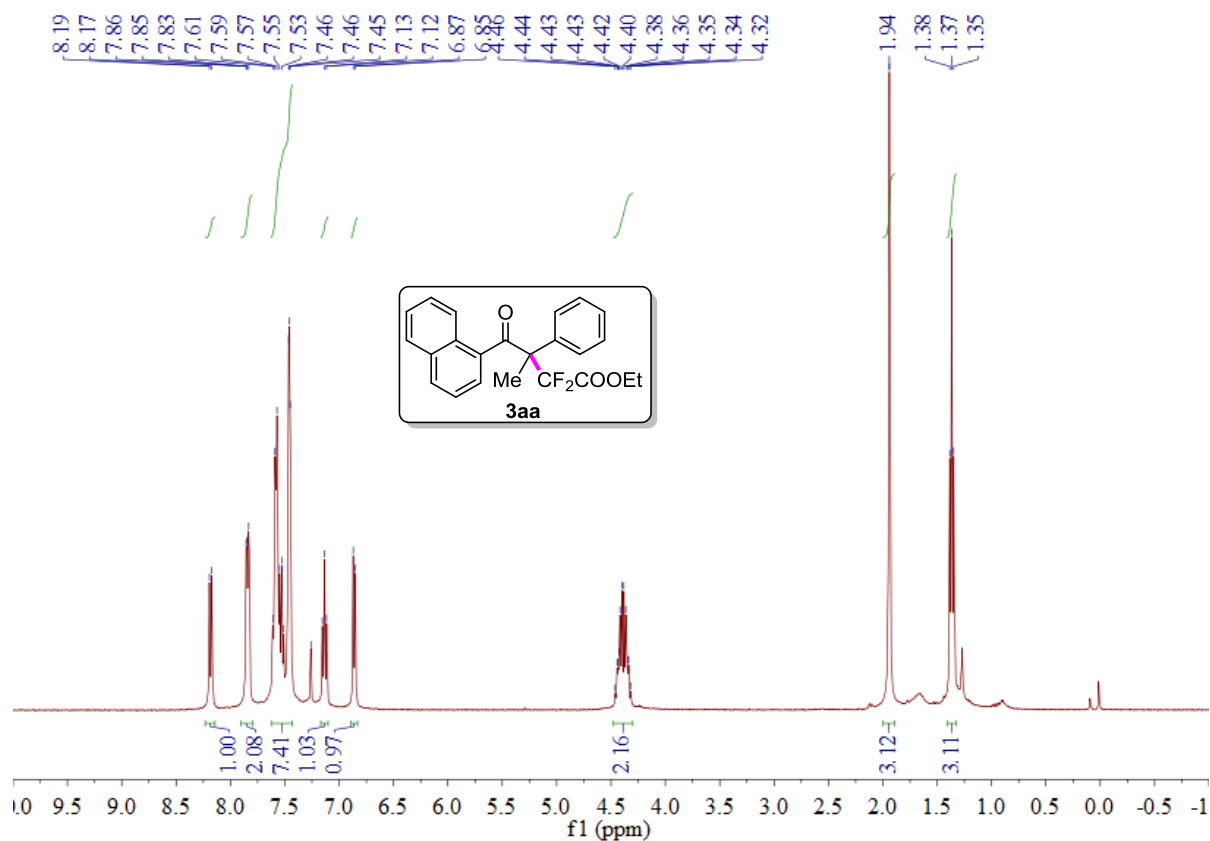

Supplementary Figure 79. <sup>1</sup>H NMR of 3aa

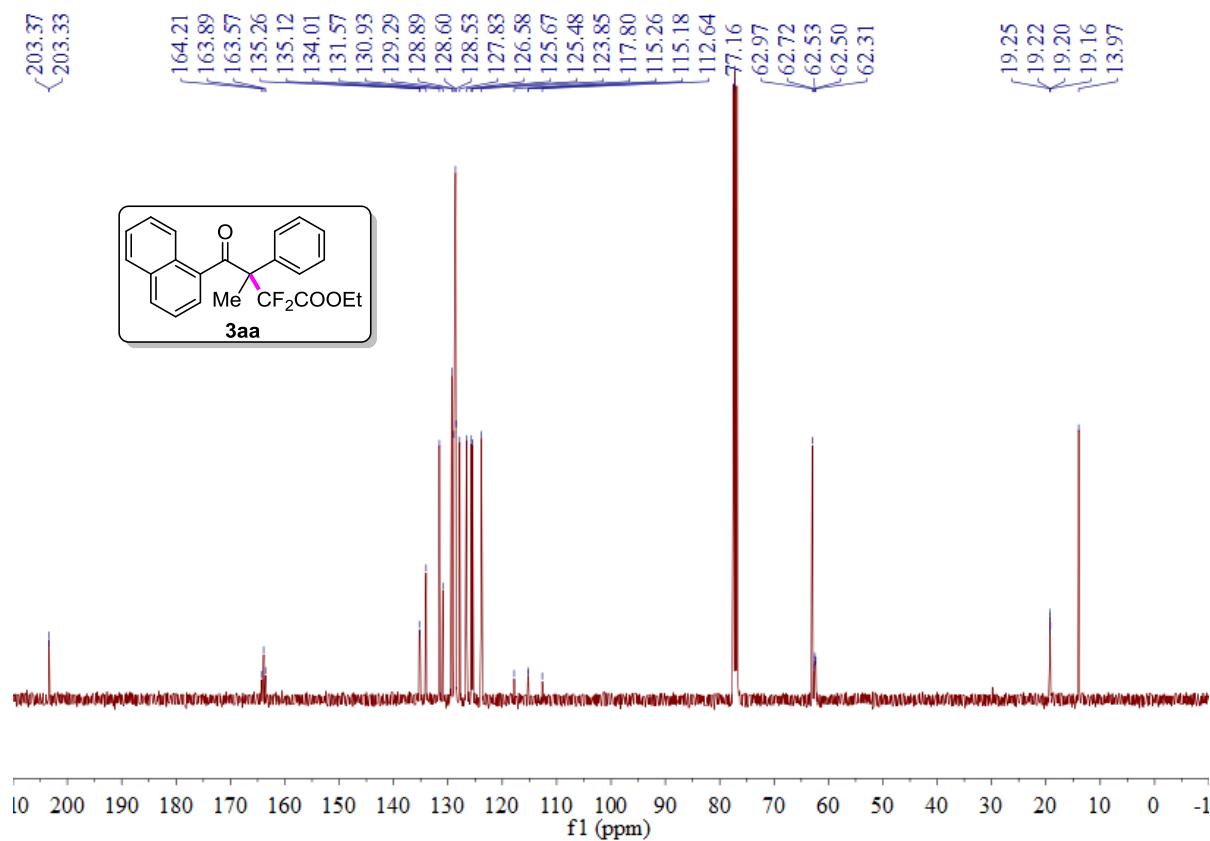

Supplementary Figure 80. <sup>13</sup>C NMR of 3aa

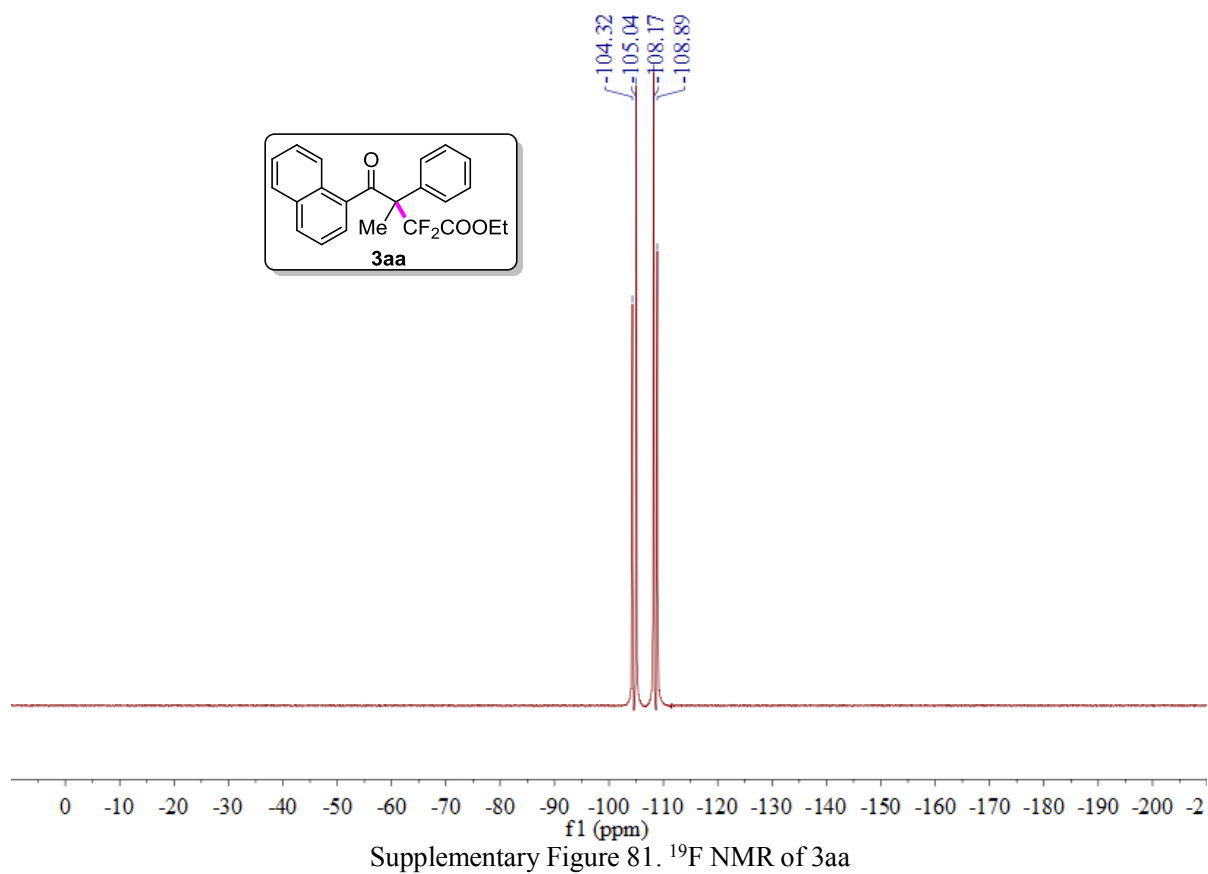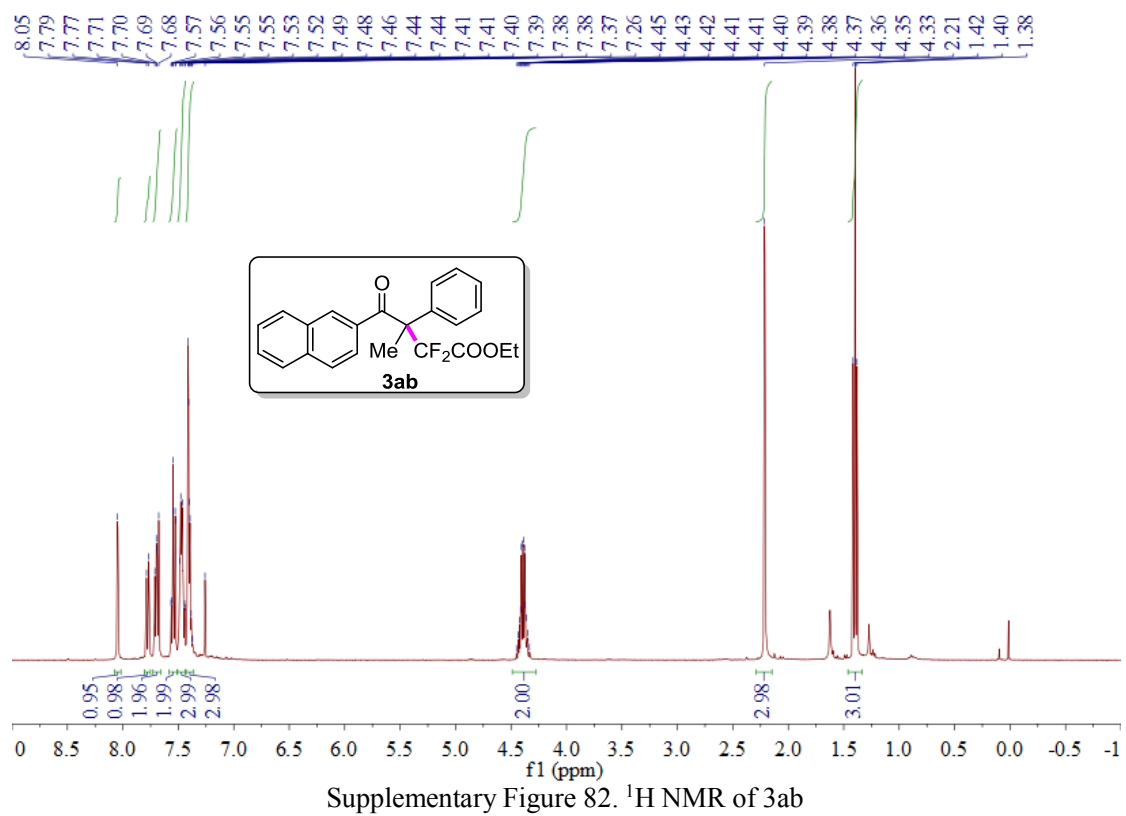

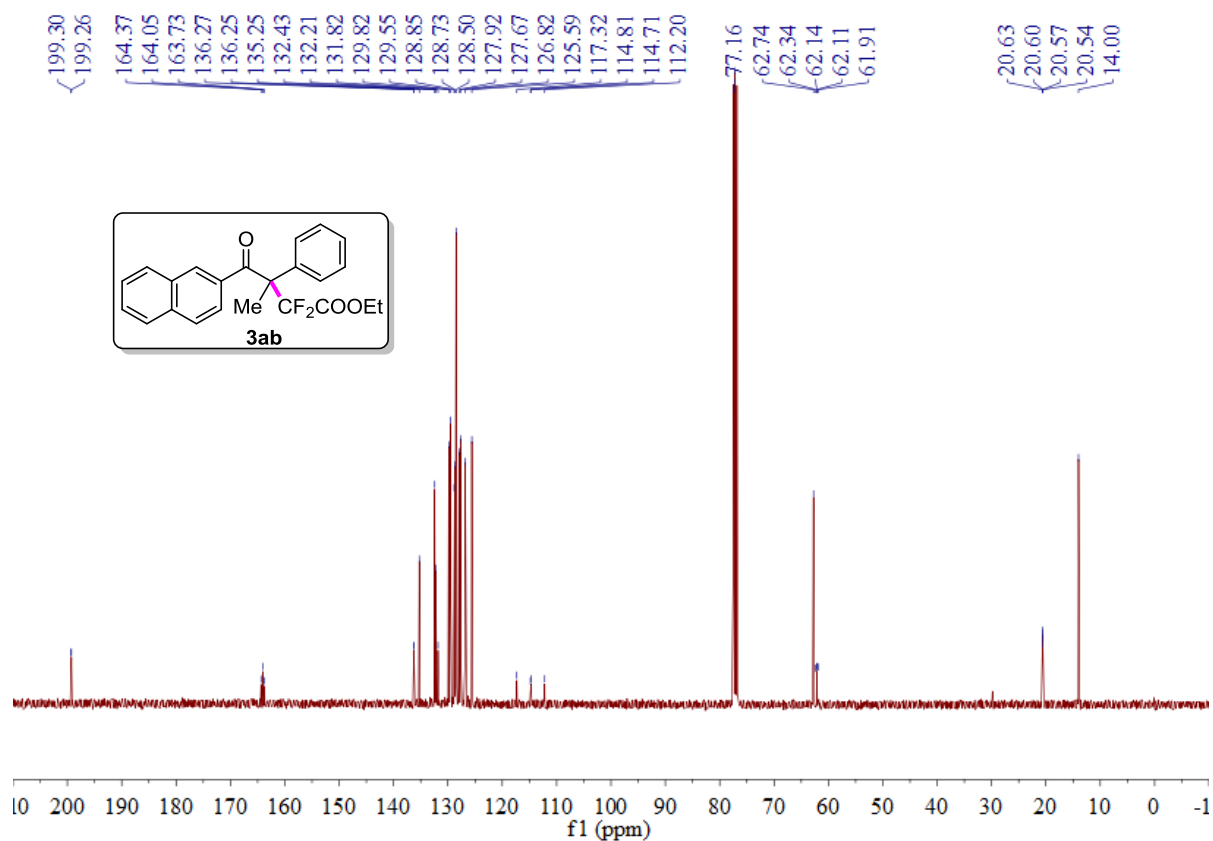

Supplementary Figure 83. <sup>13</sup>C NMR of 3ab

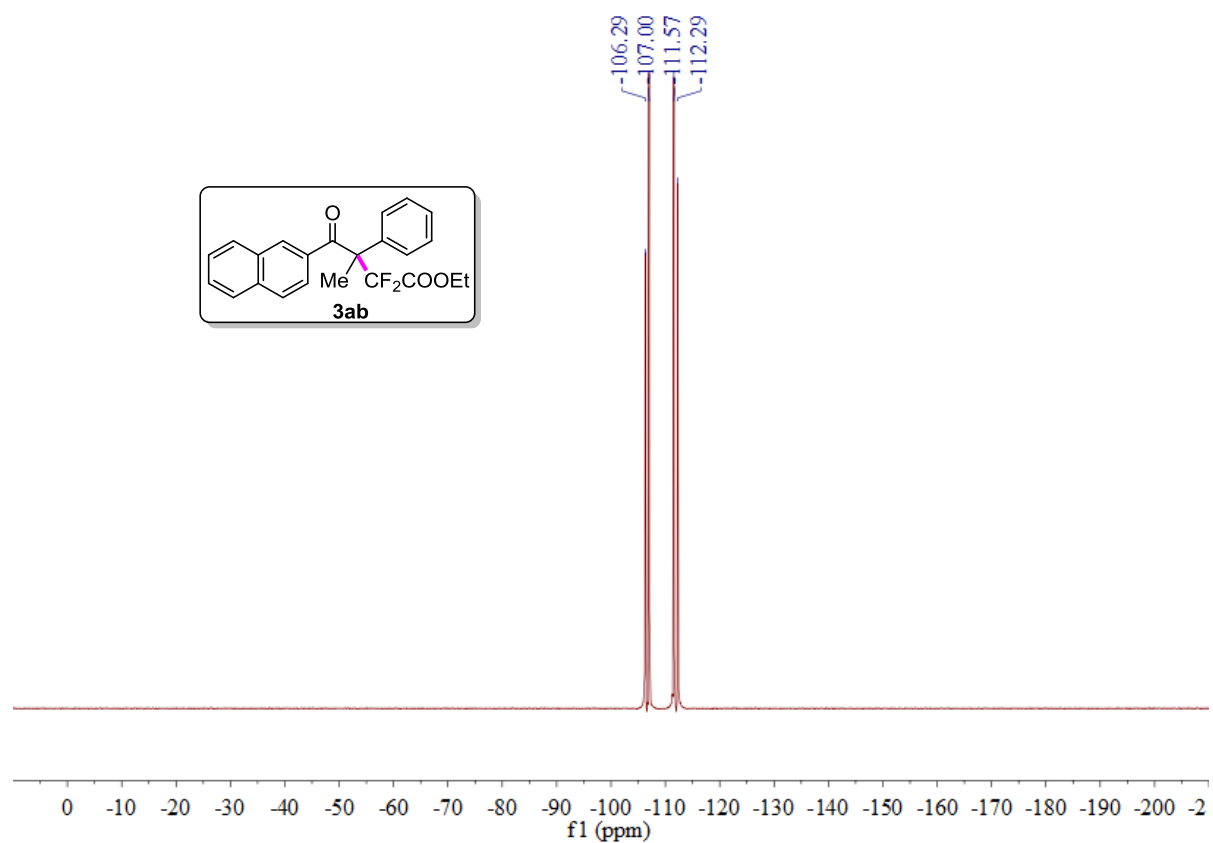

Supplementary Figure 84. <sup>19</sup>F NMR of 3ab

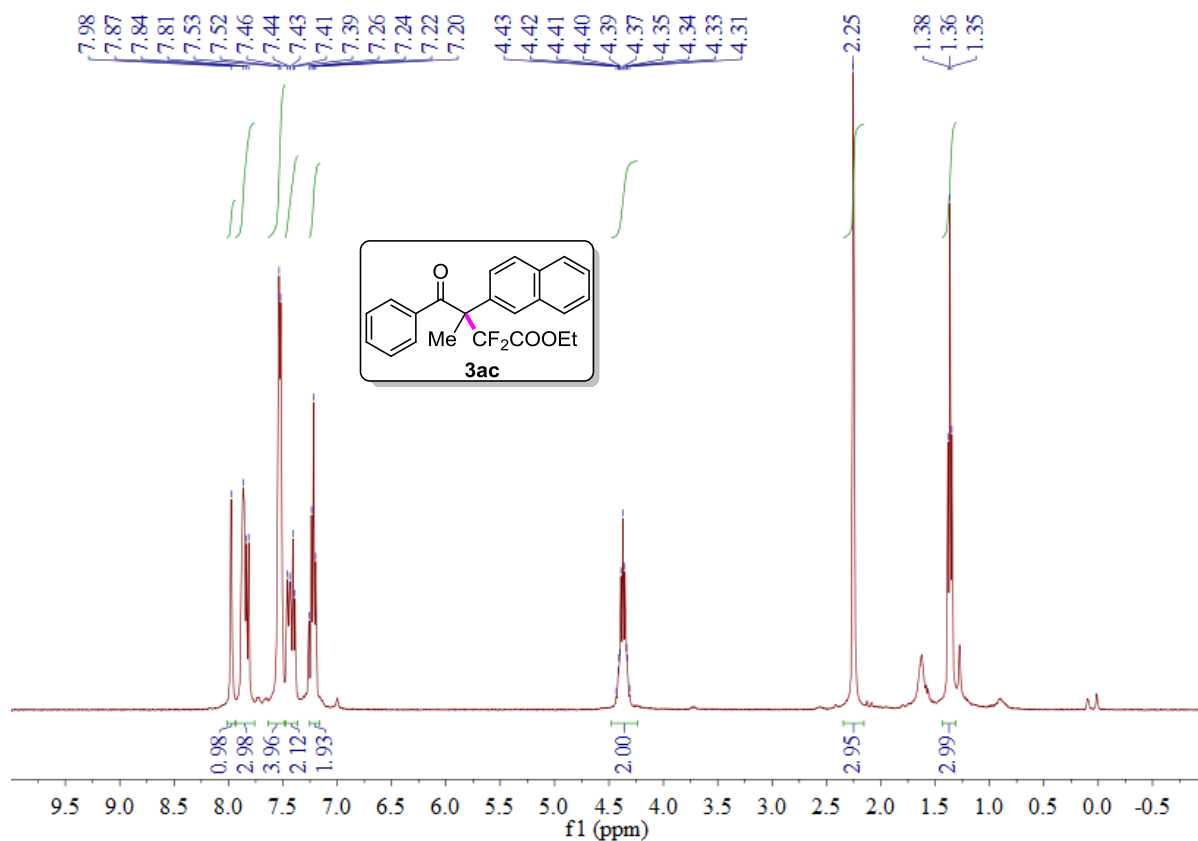

Supplementary Figure 85.  $^1\text{H}$  NMR of **3ac**

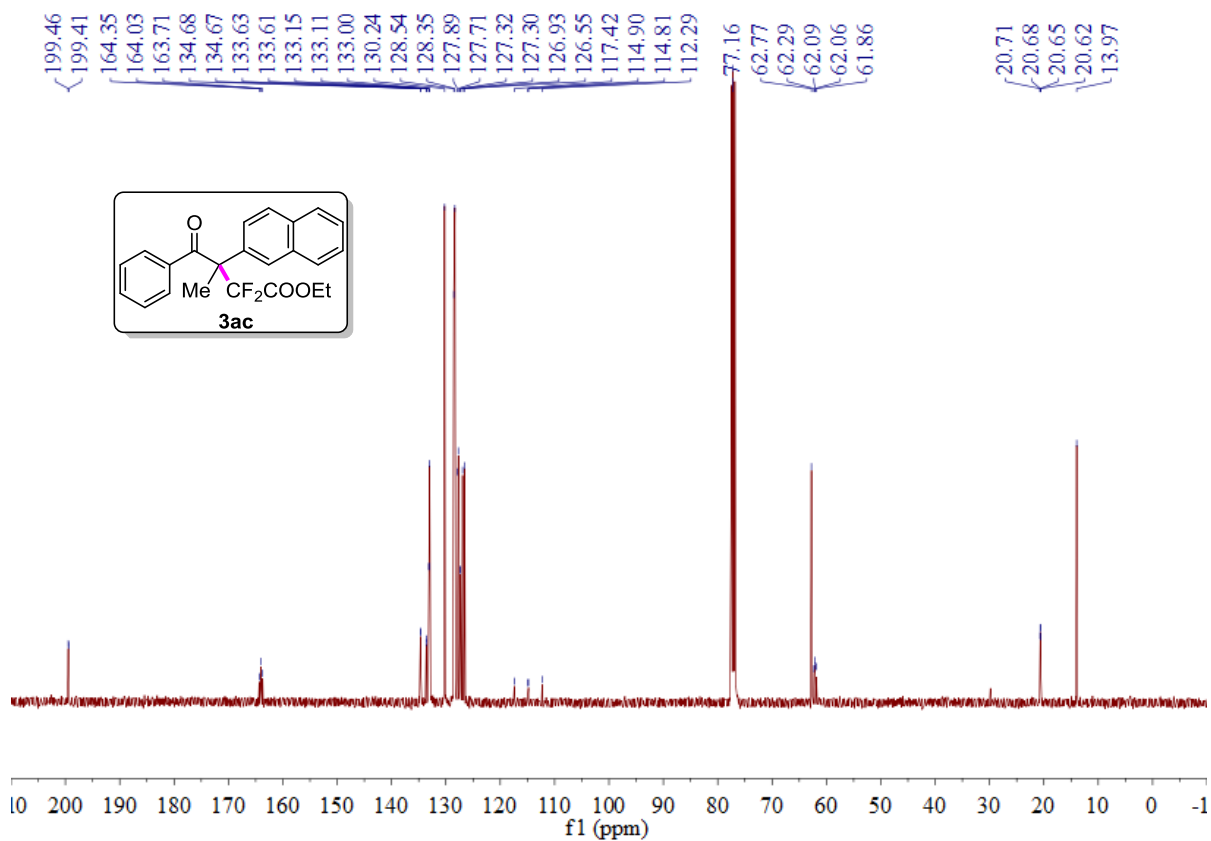

Supplementary Figure 86.  $^{13}\text{C}$  NMR of **3ac**

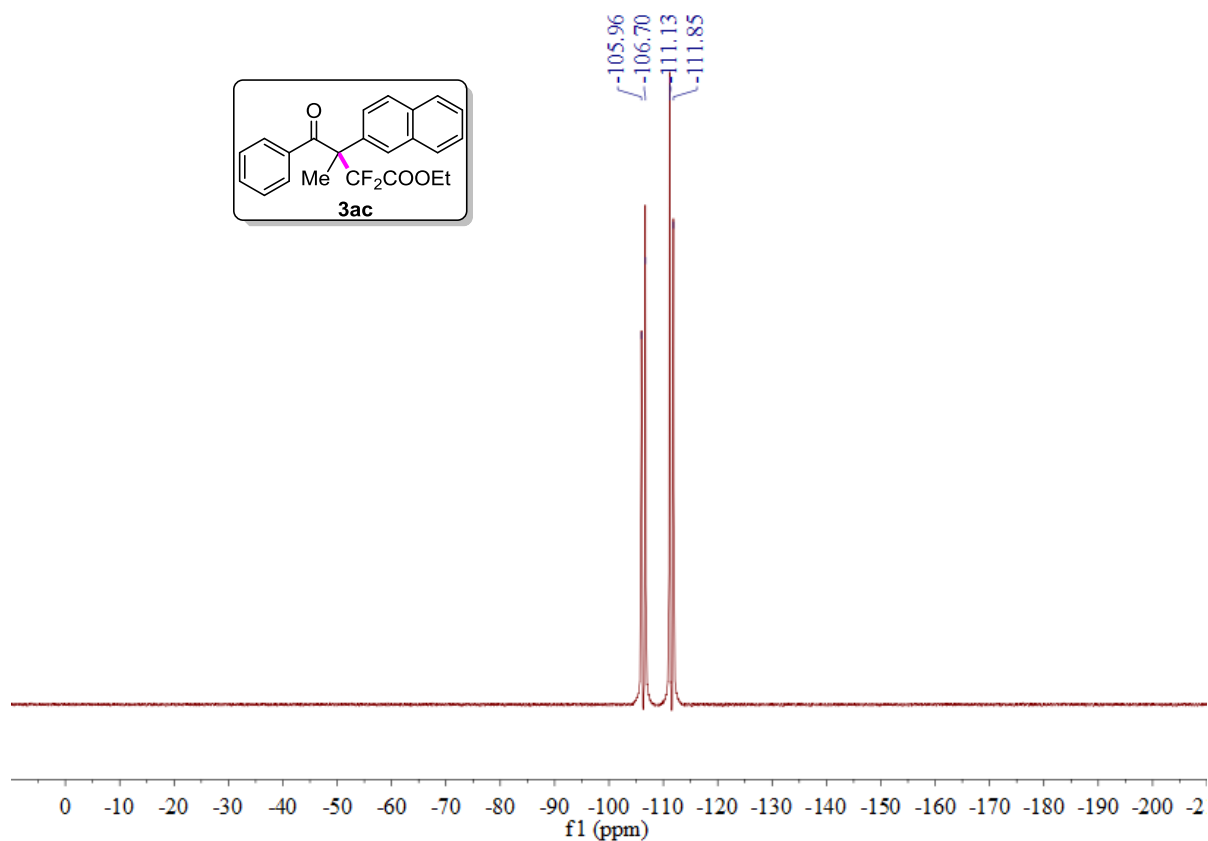

Supplementary Figure 87.  $^{19}\text{F}$  NMR of **3ac**

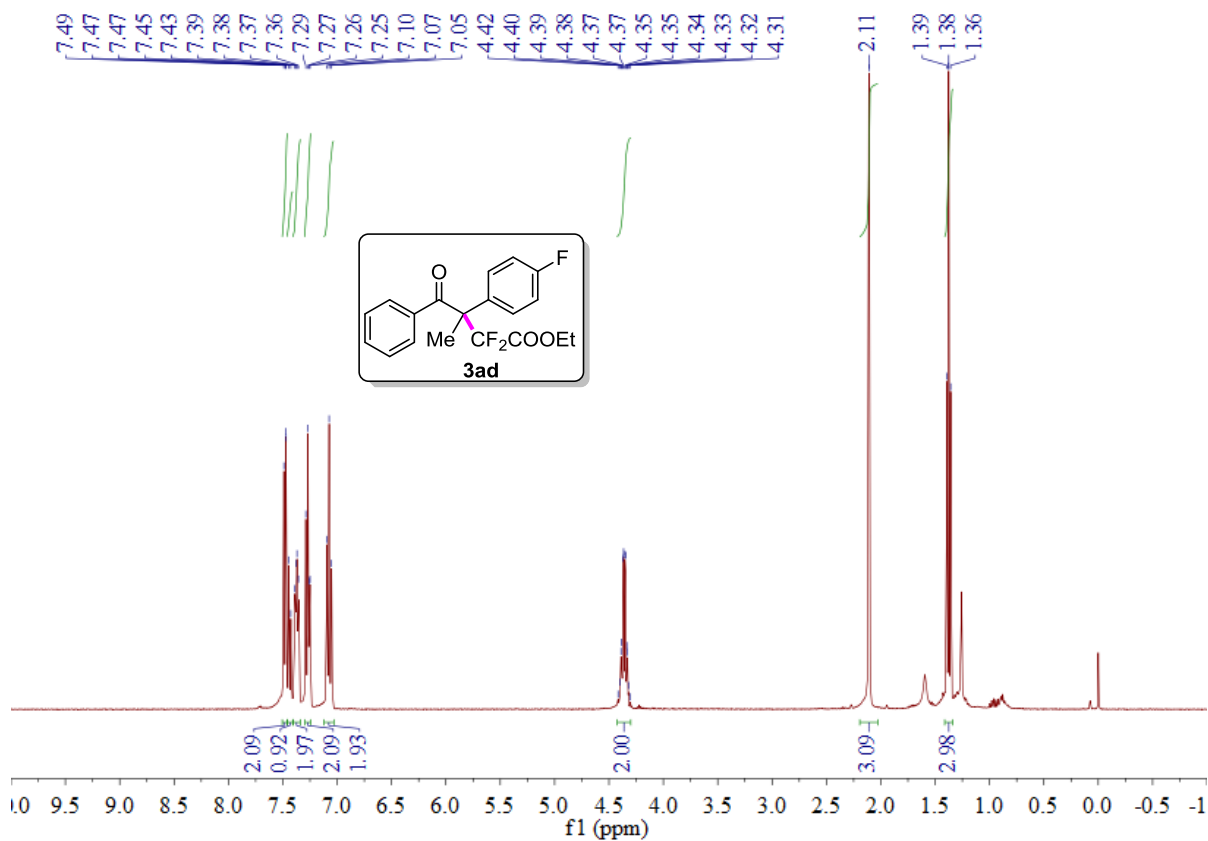

Supplementary Figure 88.  $^1\text{H}$  NMR of **3ad**

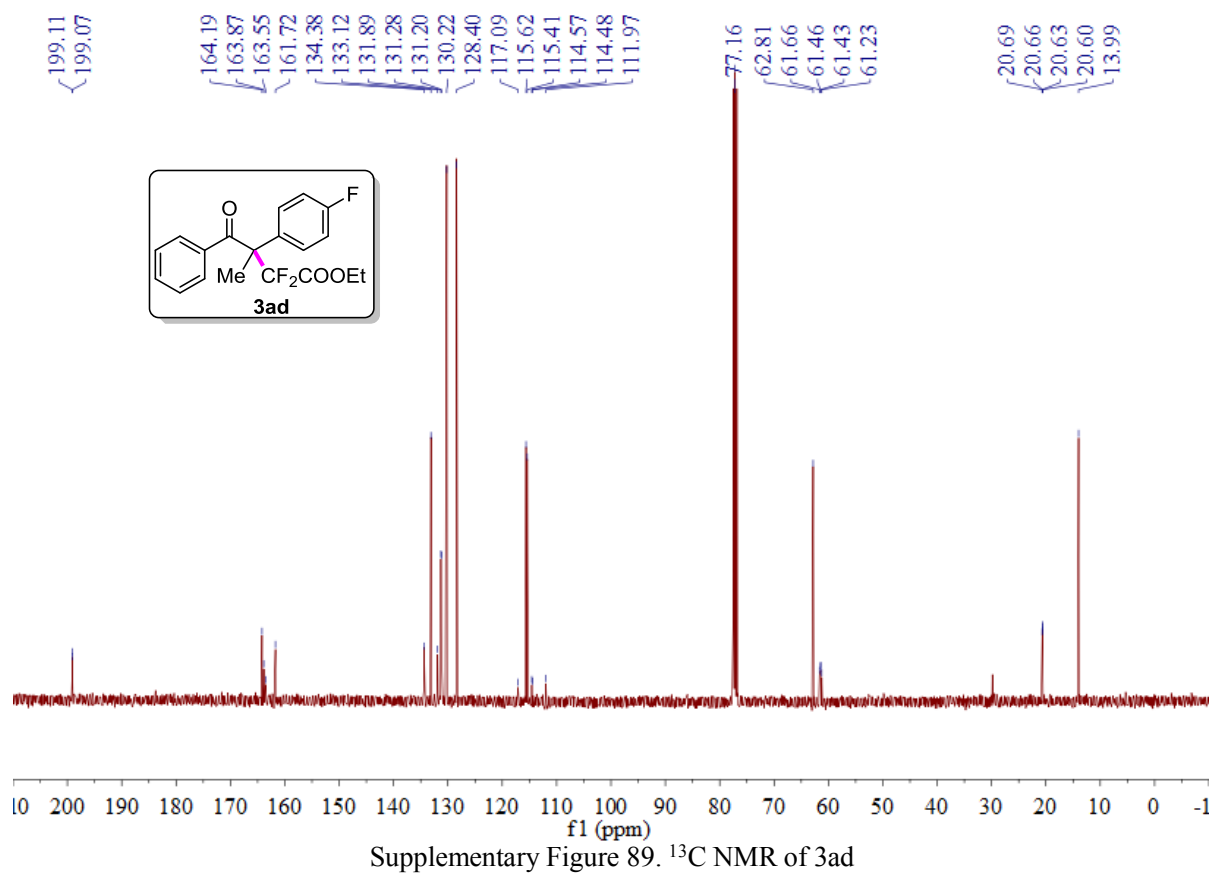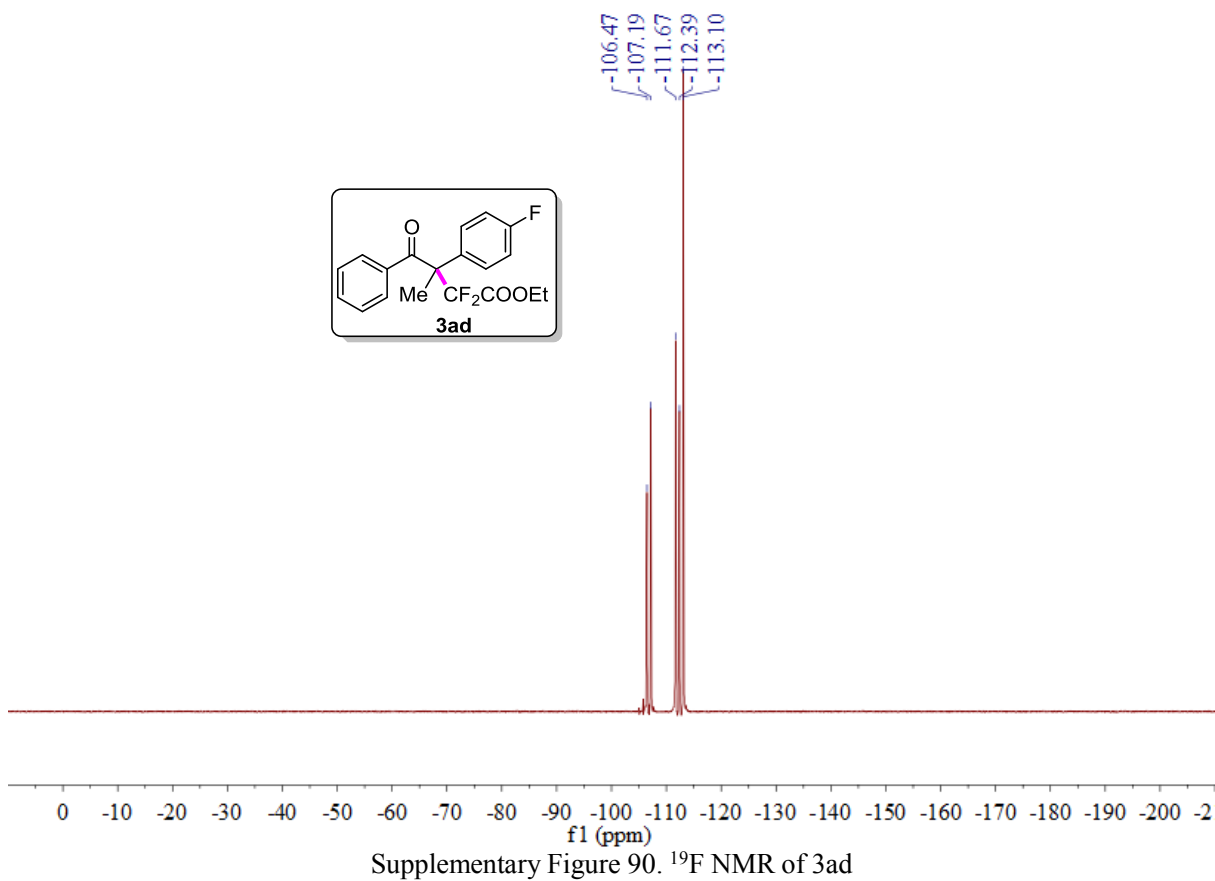

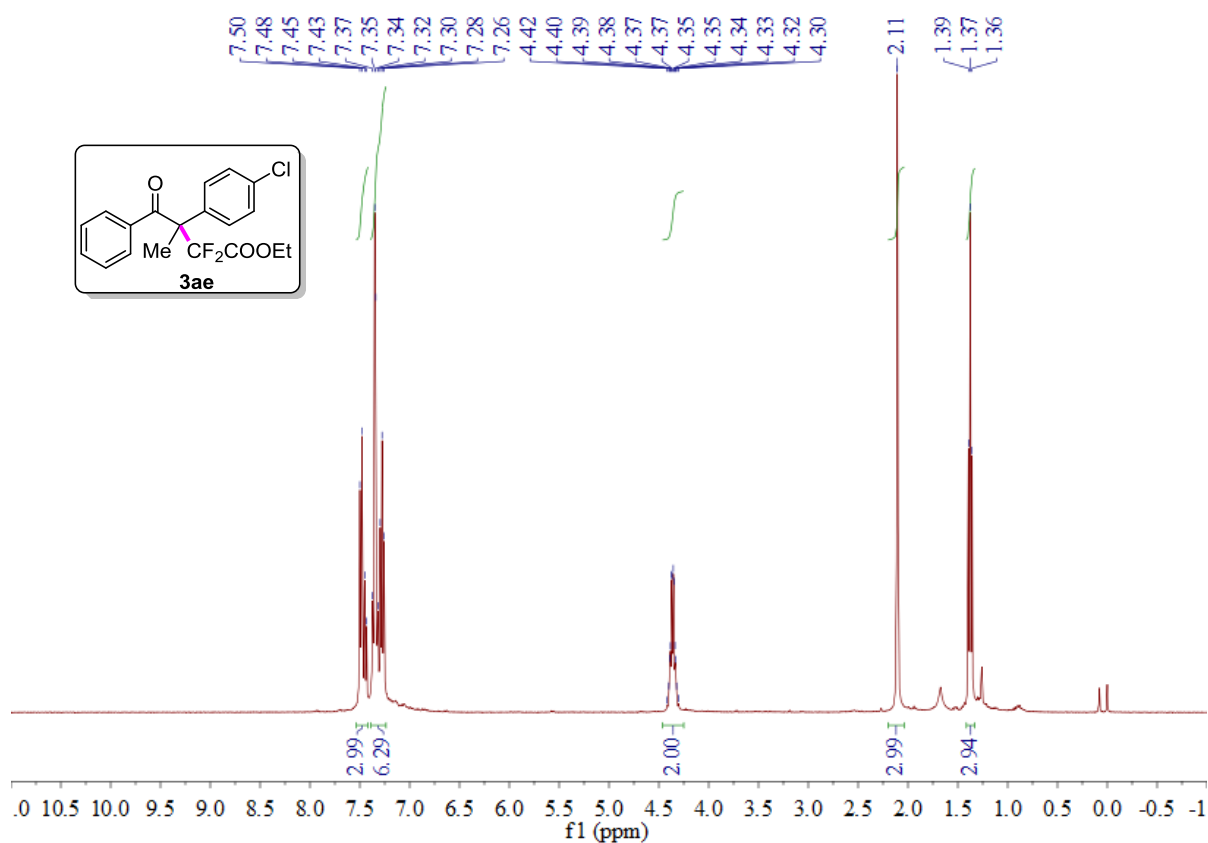

Supplementary Figure 91. <sup>1</sup>H NMR of **3ae**

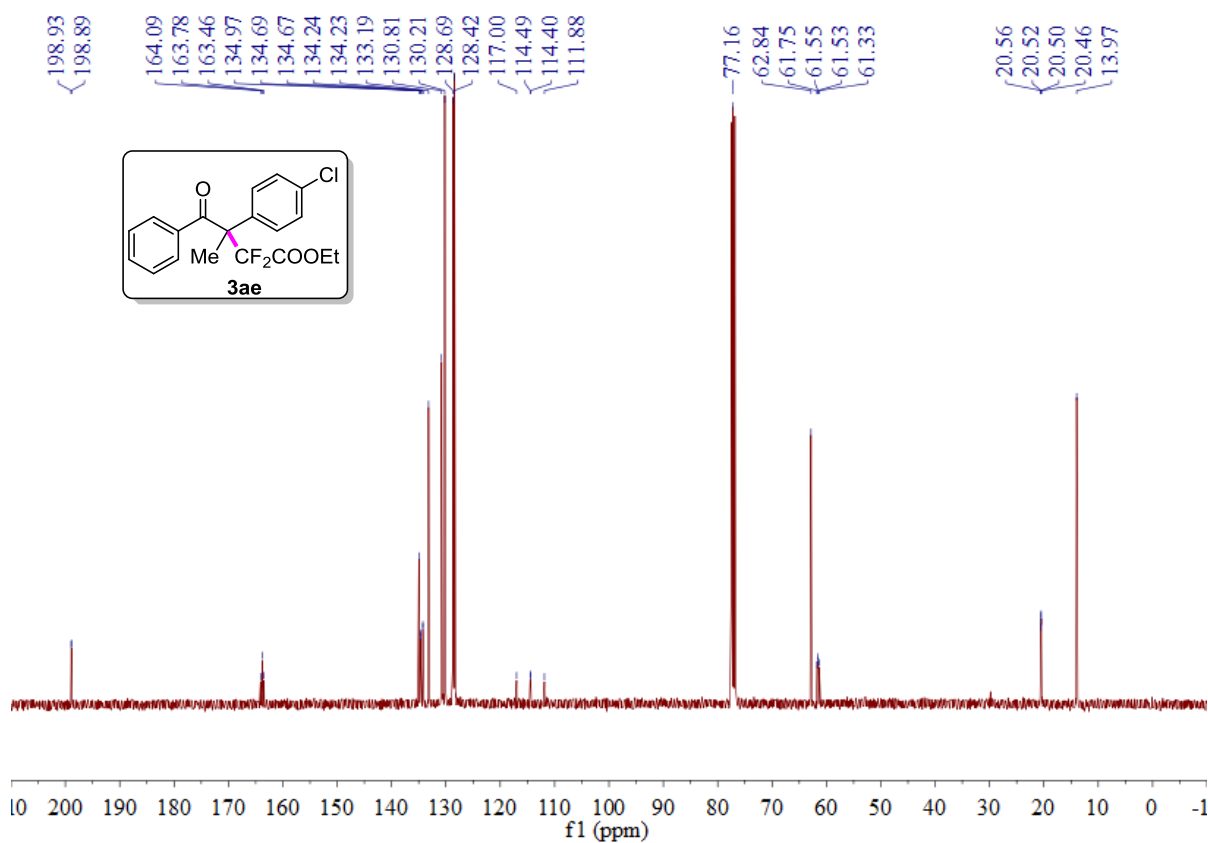

Supplementary Figure 92. <sup>13</sup>C NMR of **3ae**

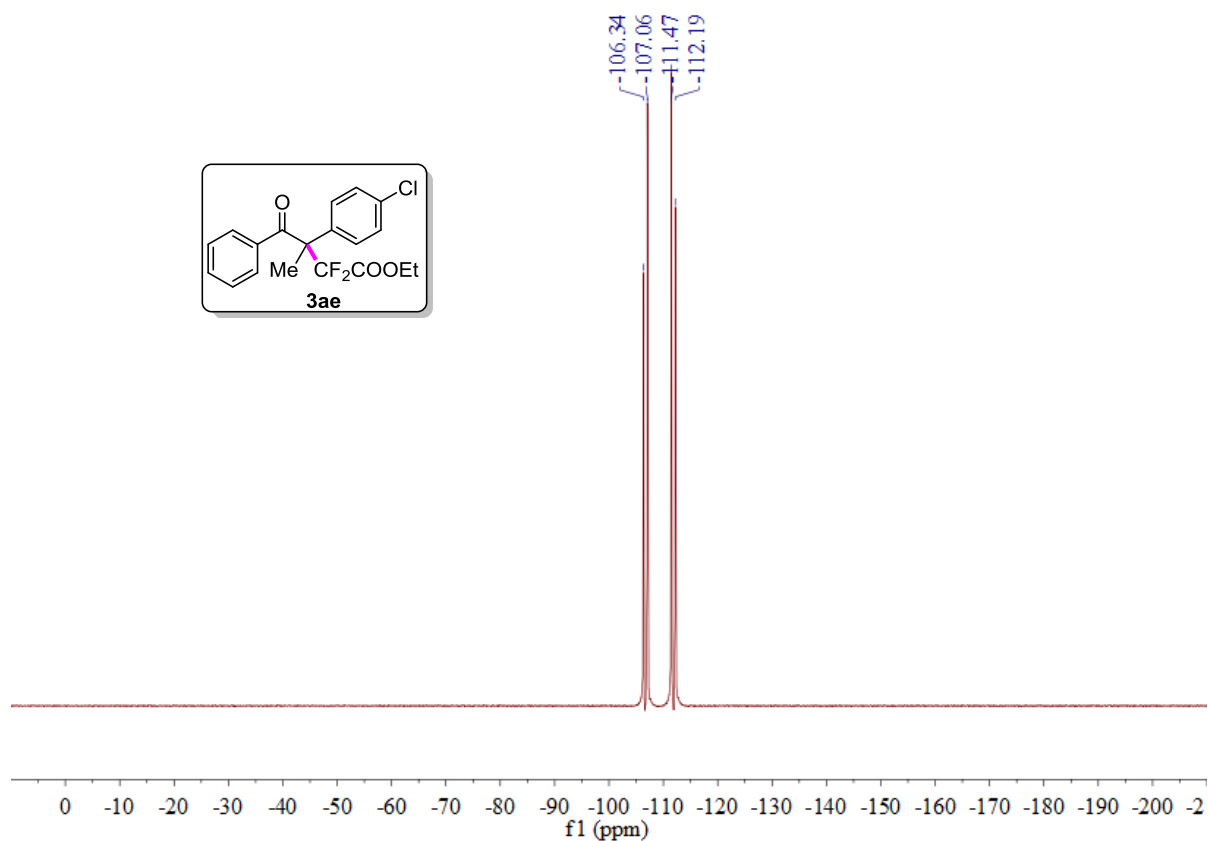

Supplementary Figure 93.  $^{19}\text{F}$  NMR of **3ae**

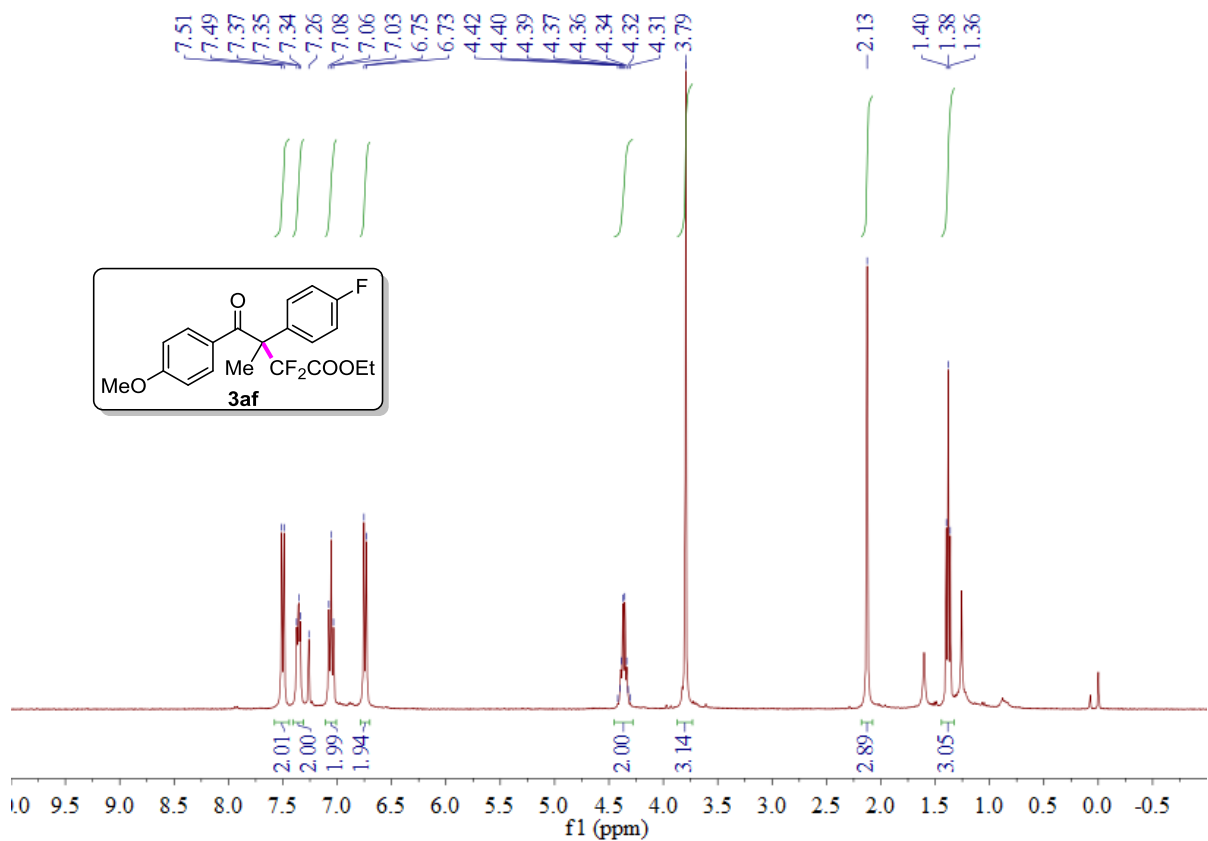

Supplementary Figure 94.  $^1\text{H}$  NMR of **3af**



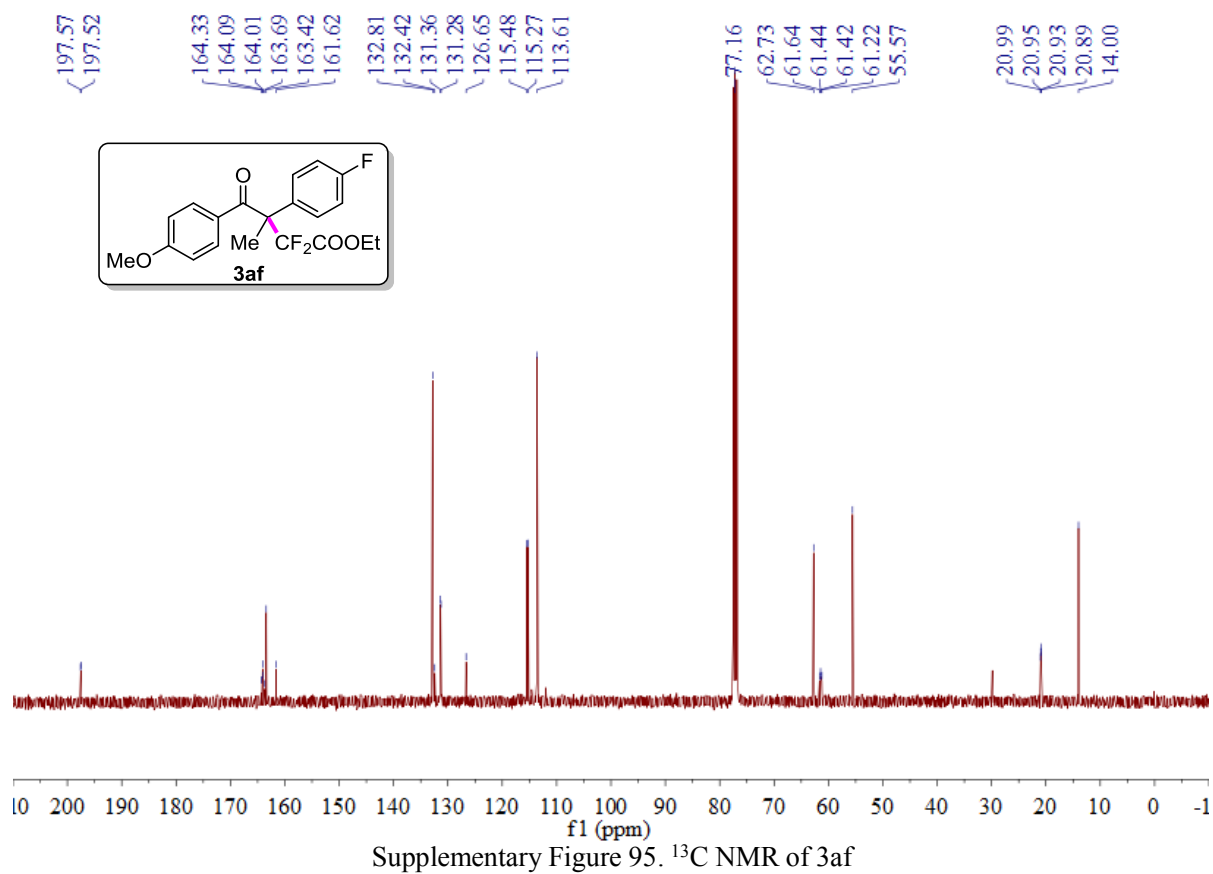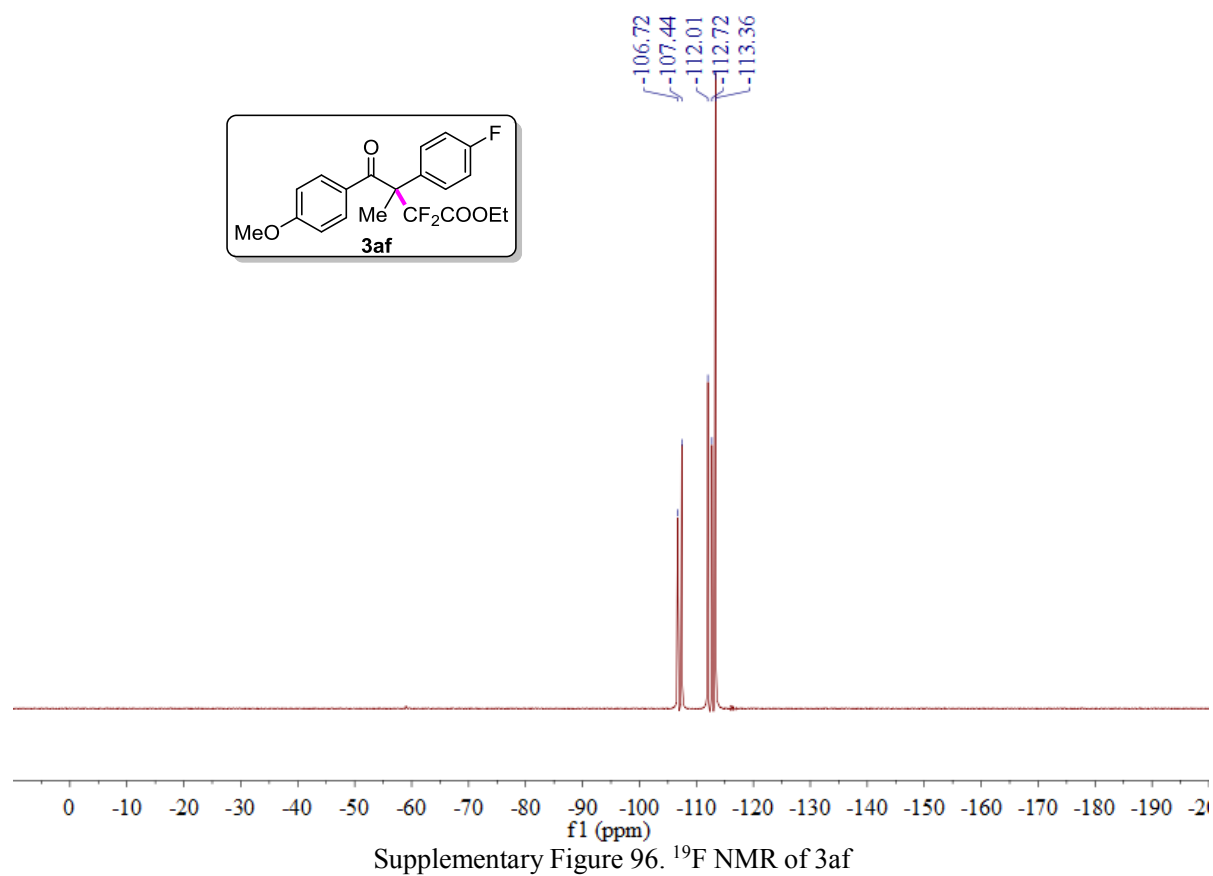

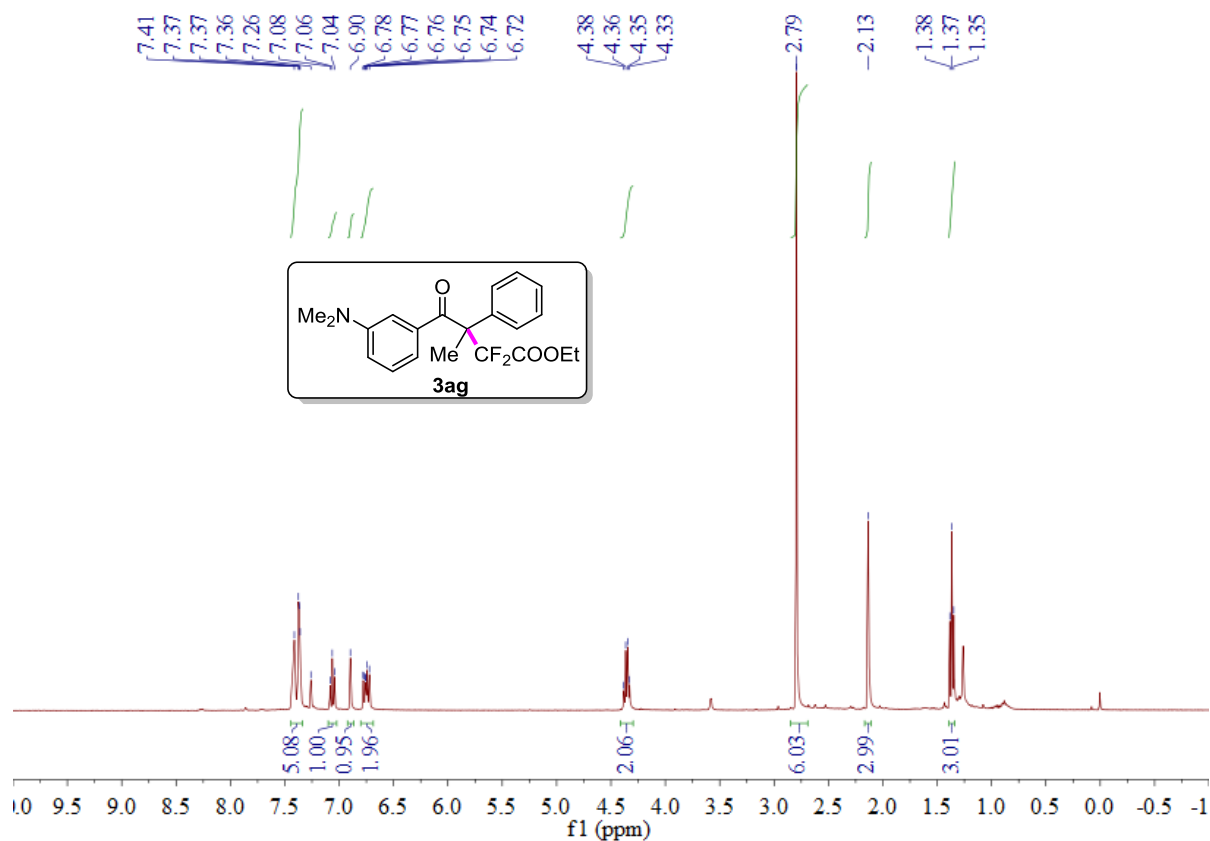

Supplementary Figure 97. <sup>1</sup>H NMR of 3ag

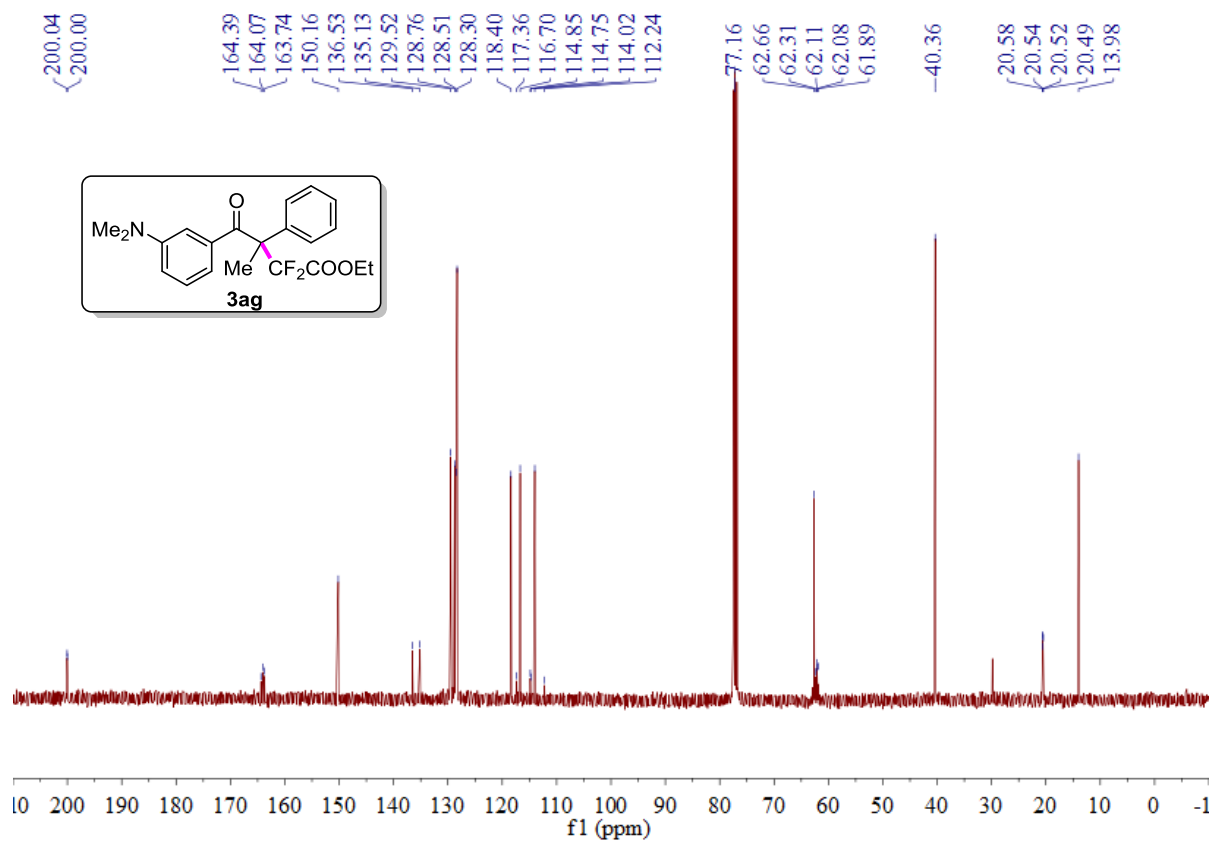

Supplementary Figure 98. <sup>13</sup>C NMR of 3ag

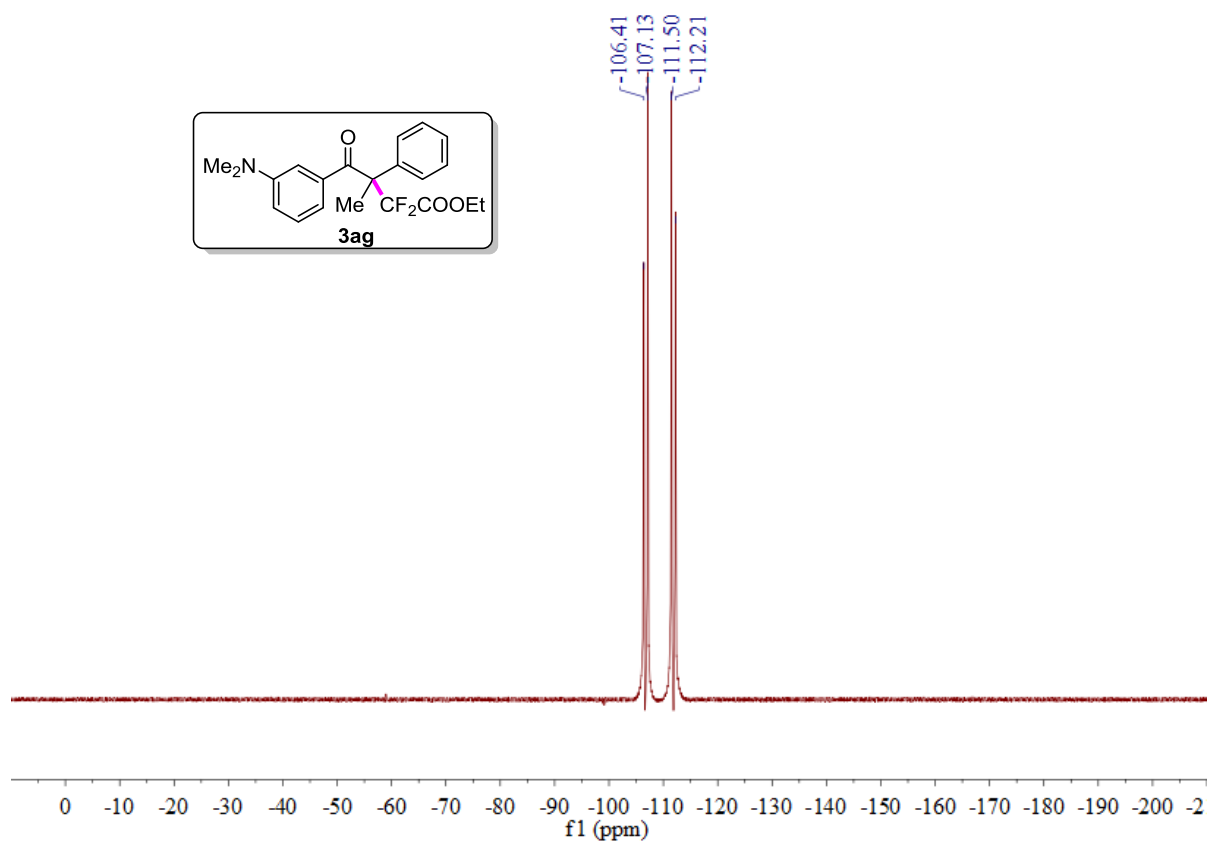

Supplementary Figure 99.  $^{19}\text{F}$  NMR of **3ag**

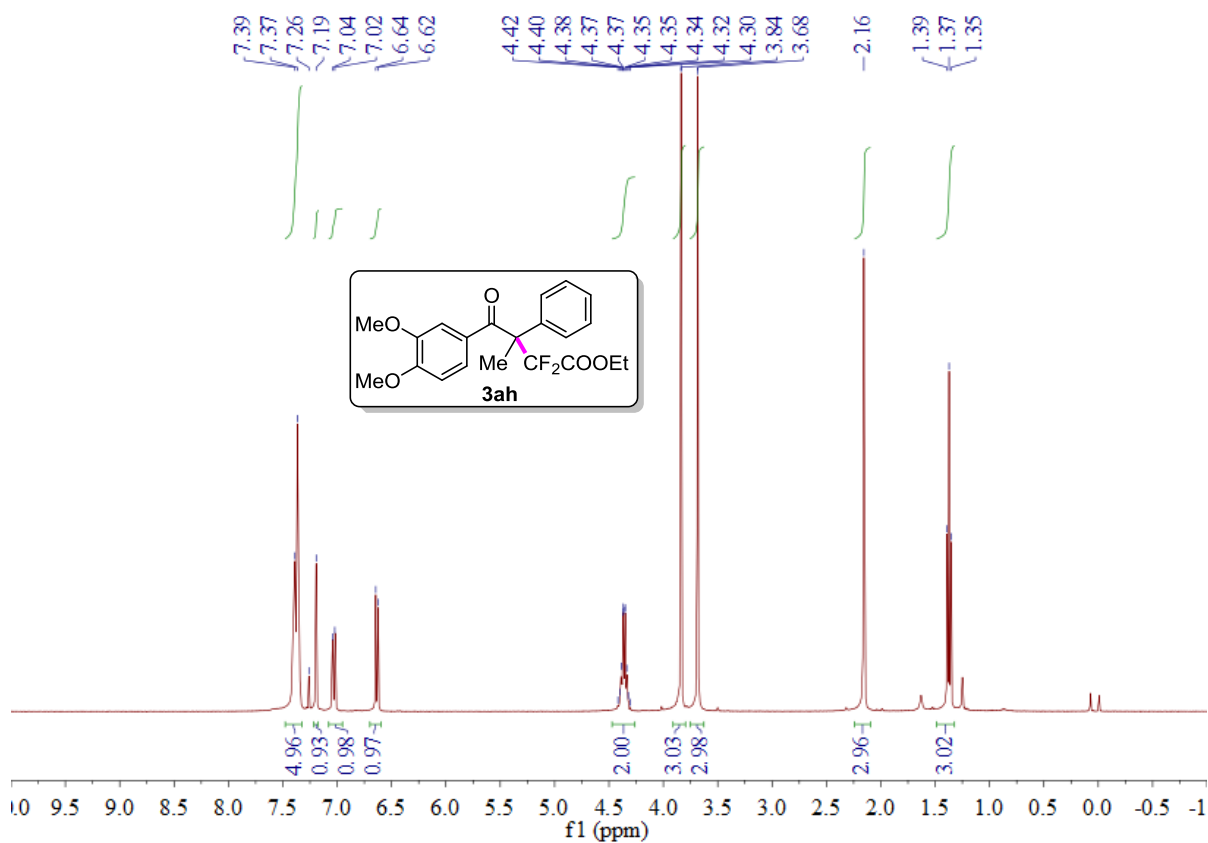

Supplementary Figure 100.  $^1\text{H}$  NMR of **3ah**

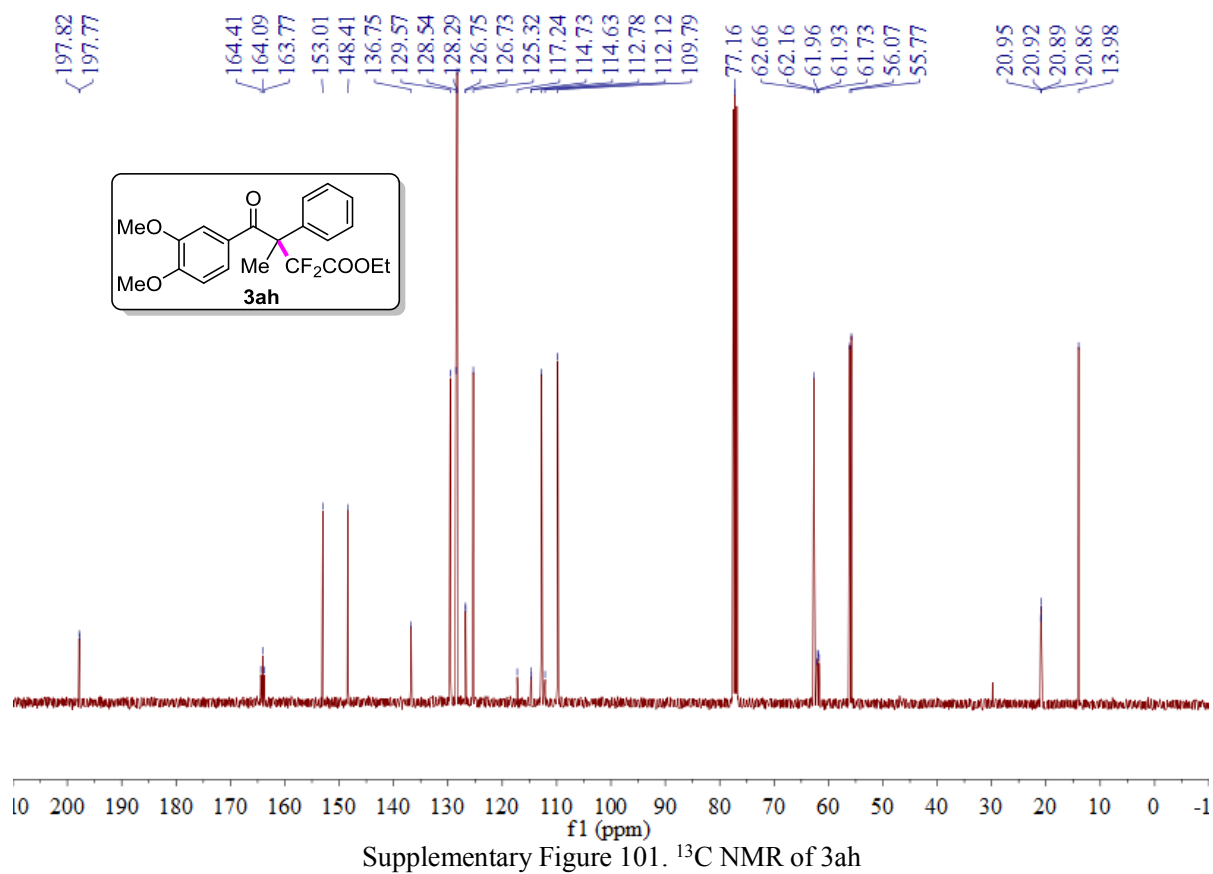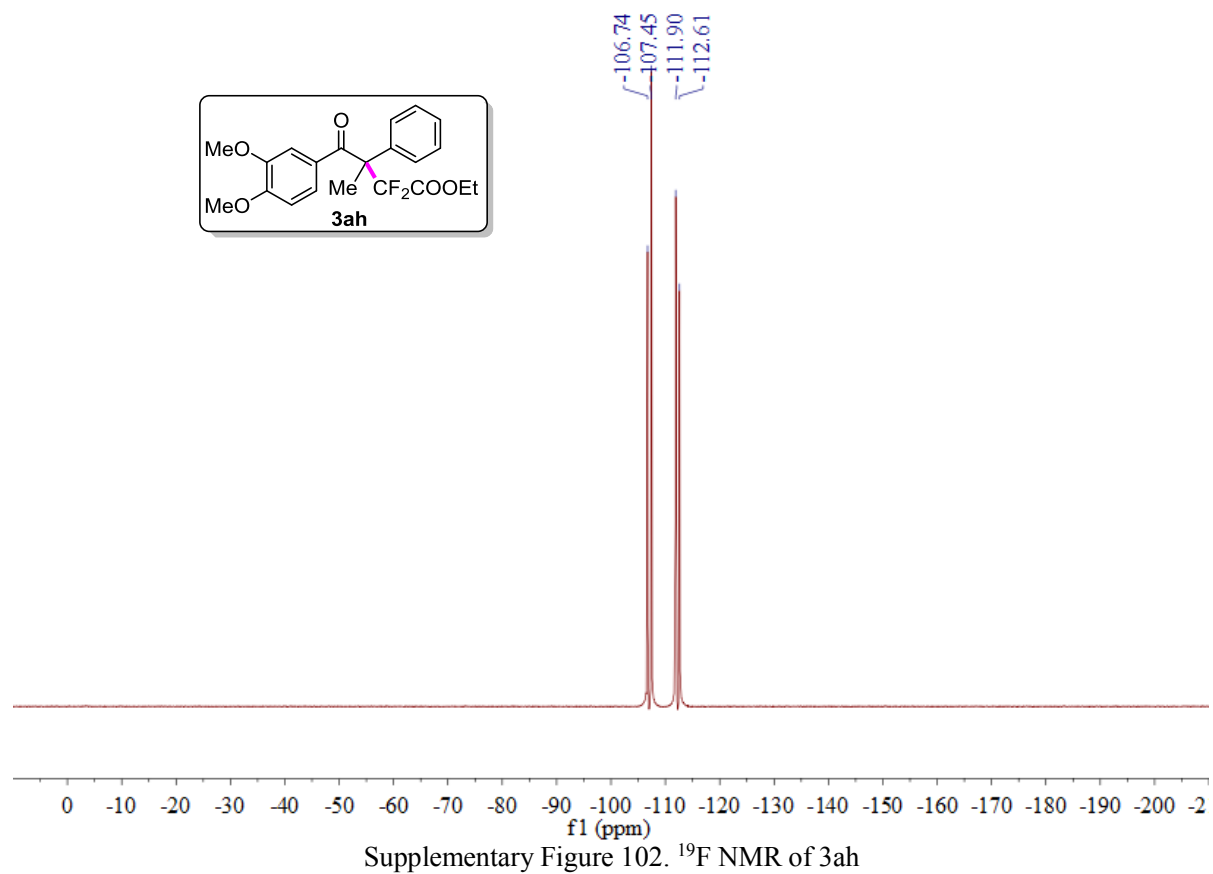

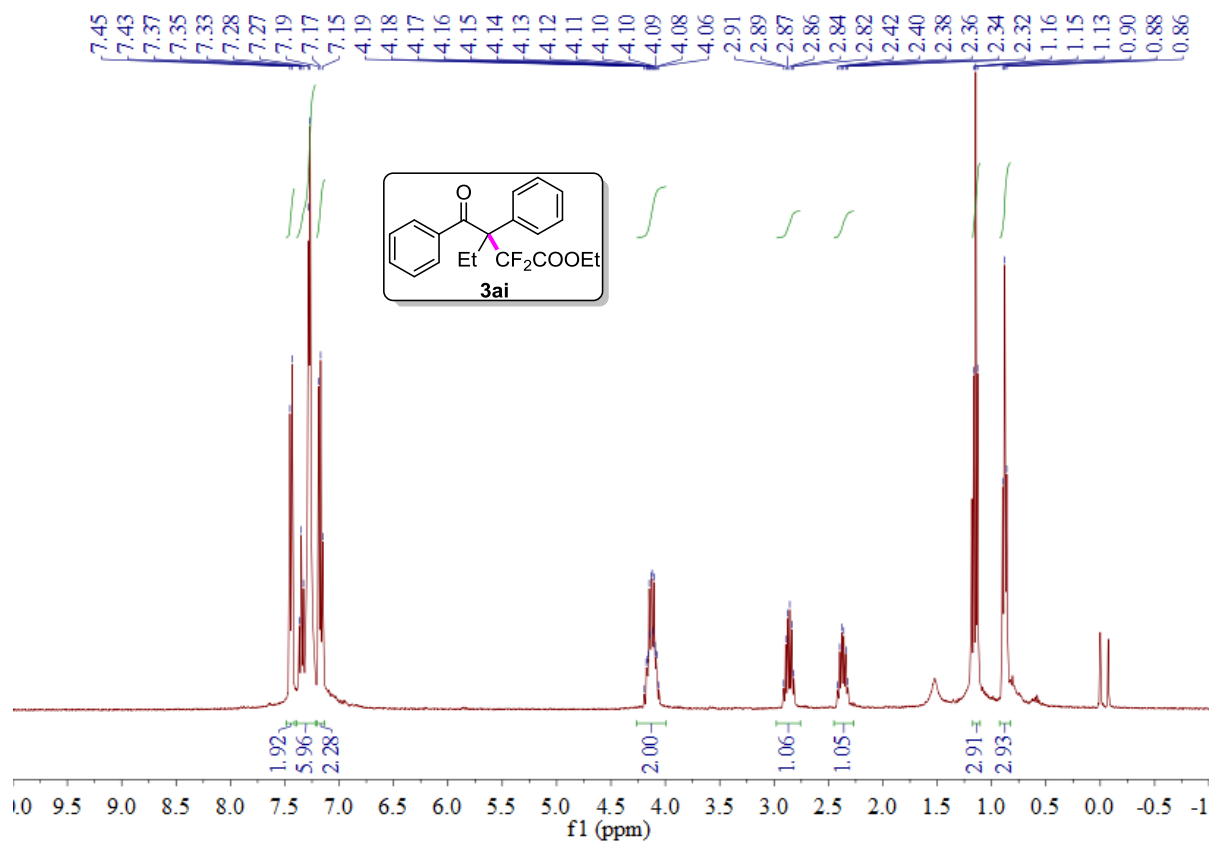

Supplementary Figure 103. <sup>1</sup>H NMR of 3ai

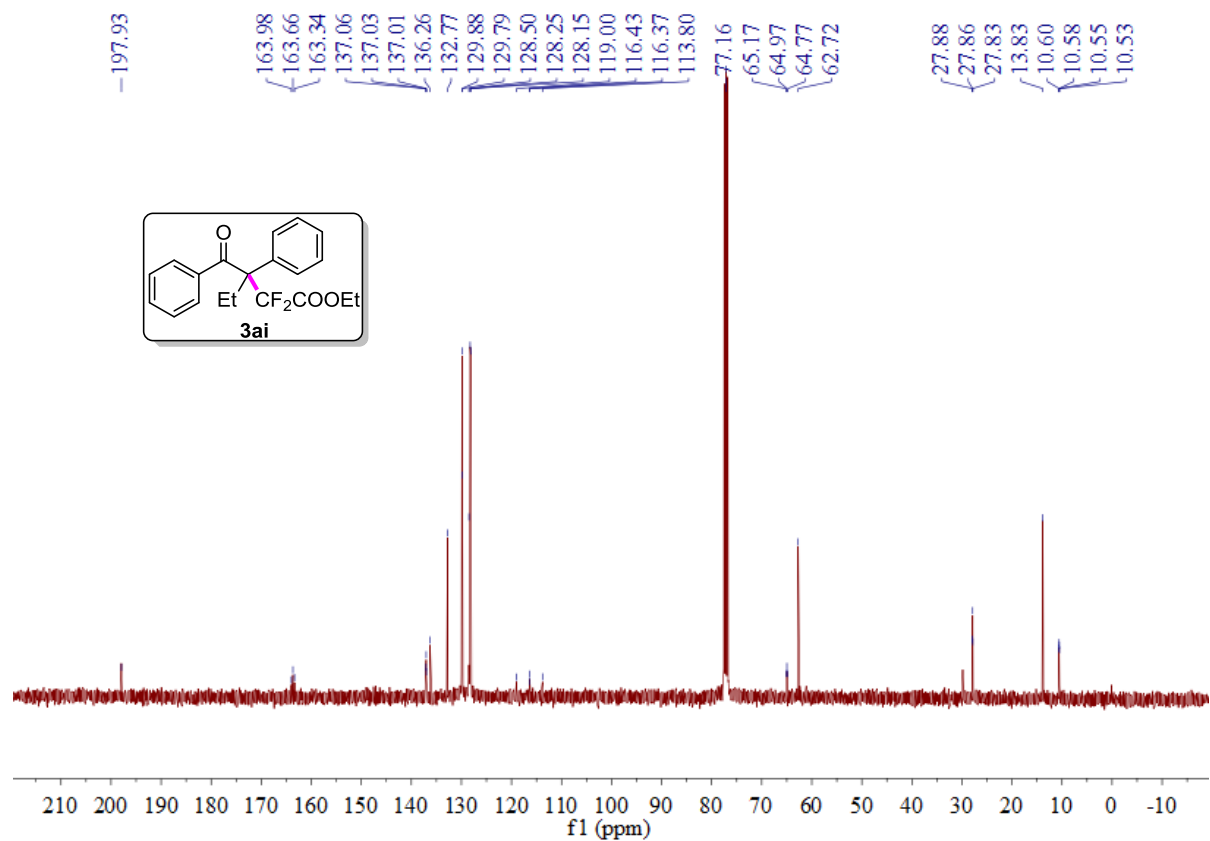

Supplementary Figure 104. <sup>13</sup>C NMR of 3ai

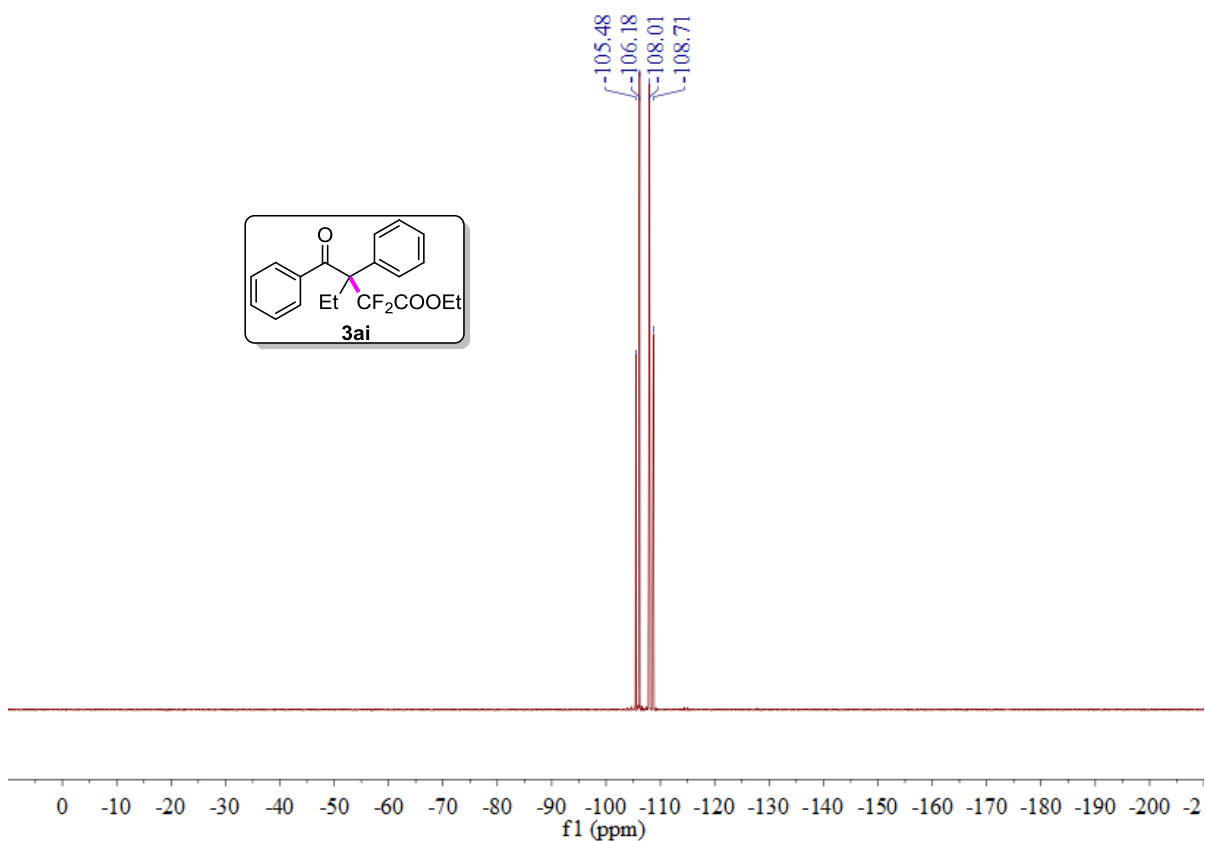

Supplementary Figure 105. <sup>19</sup>F NMR of 3ai

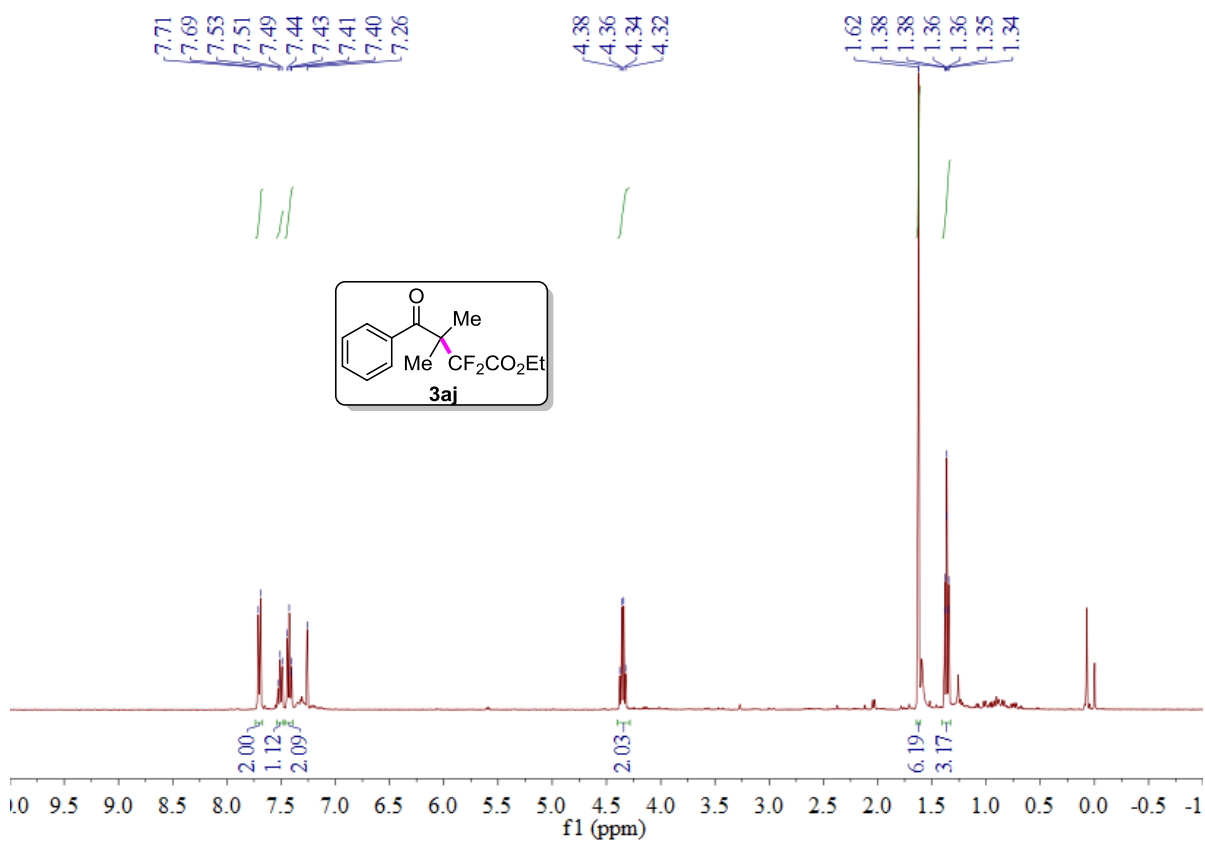

Supplementary Figure 106. <sup>1</sup>H NMR of 3aj

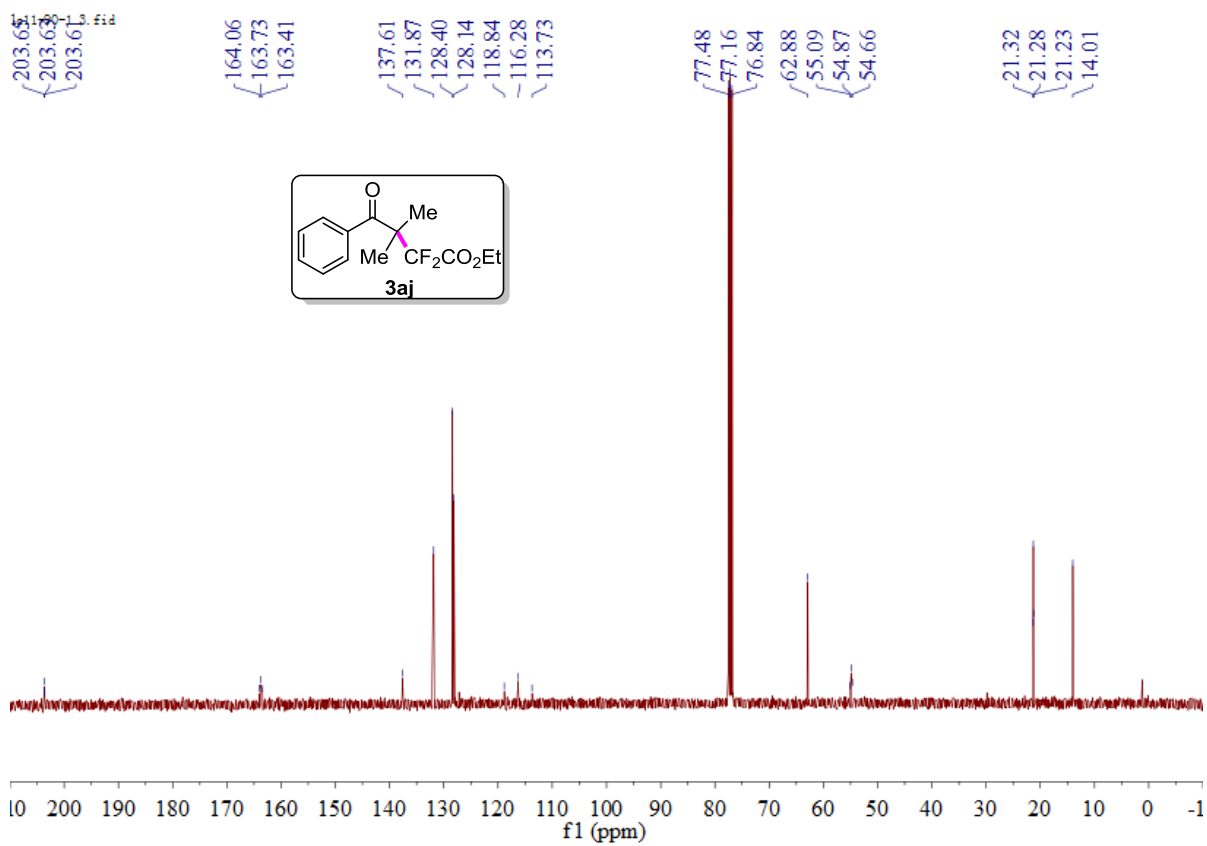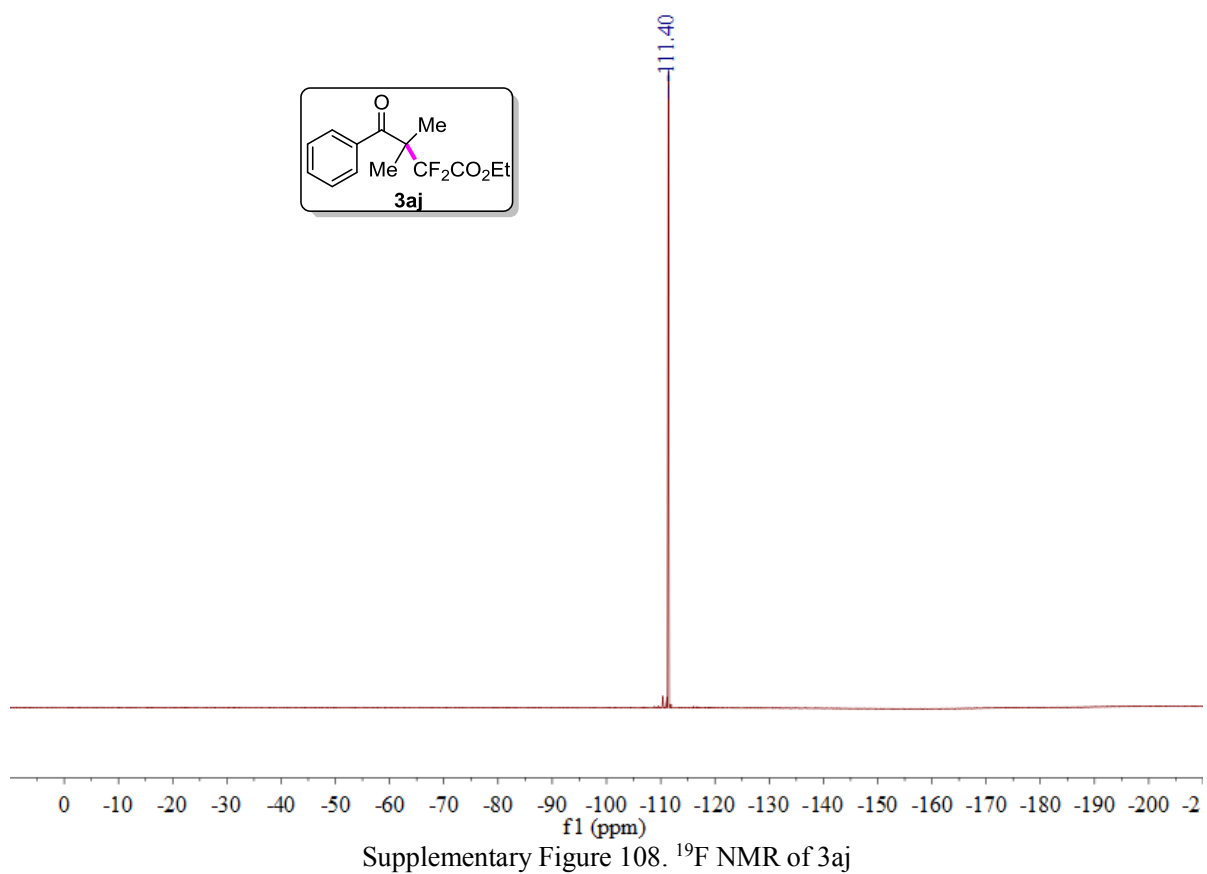

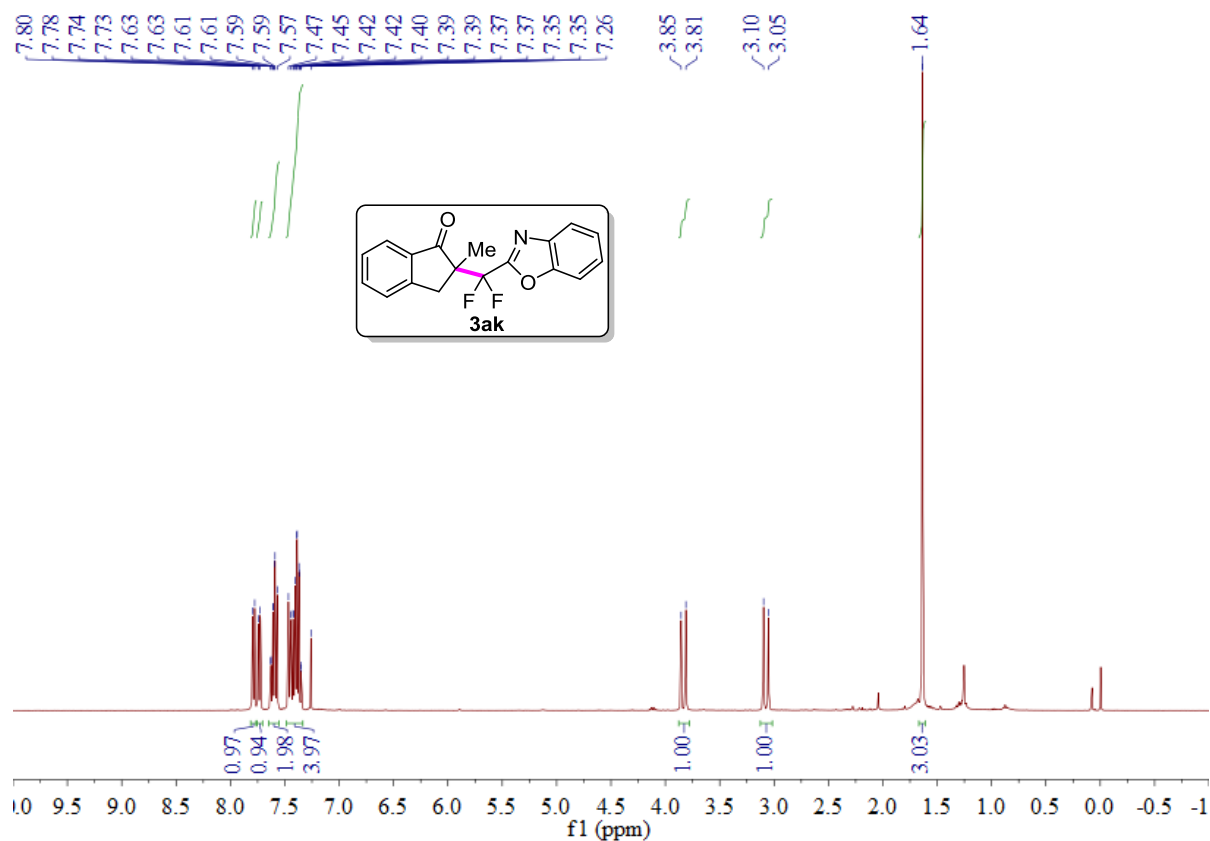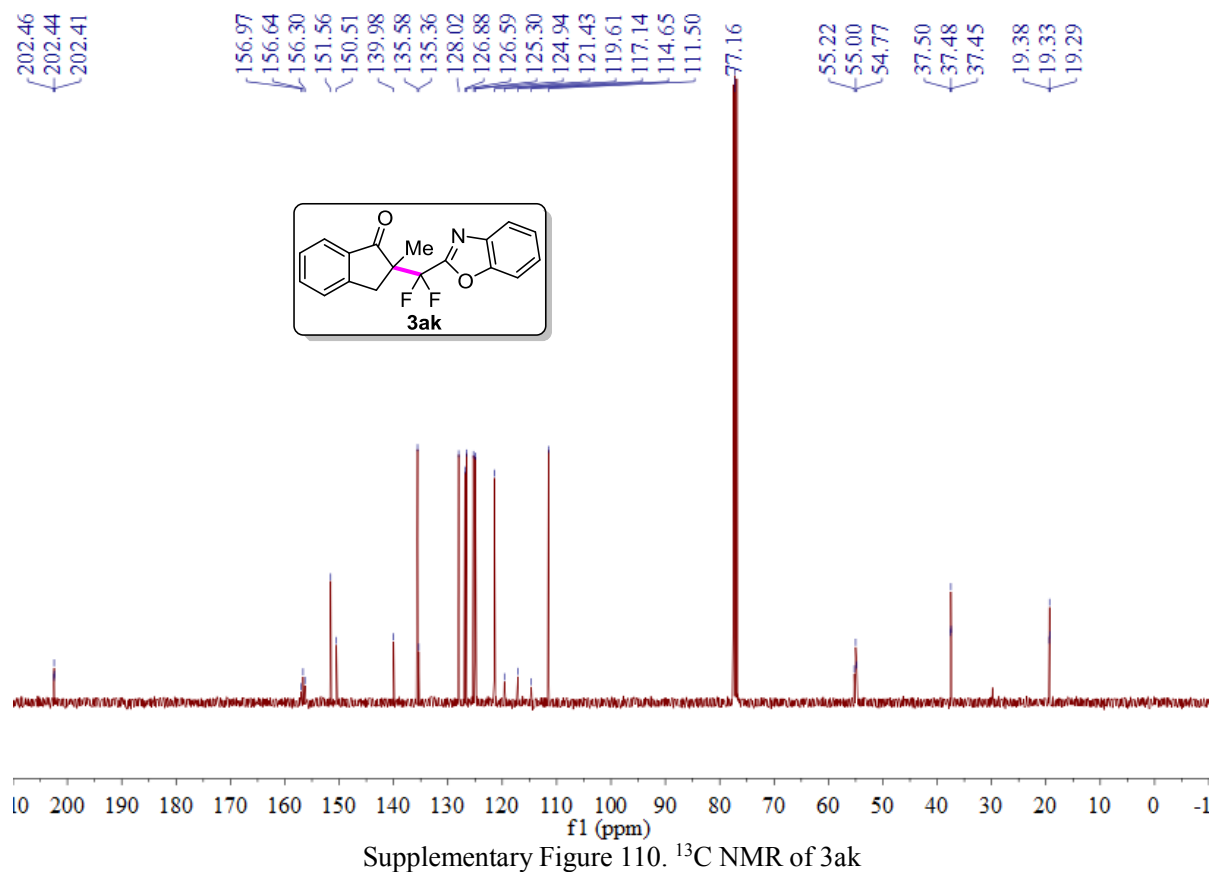



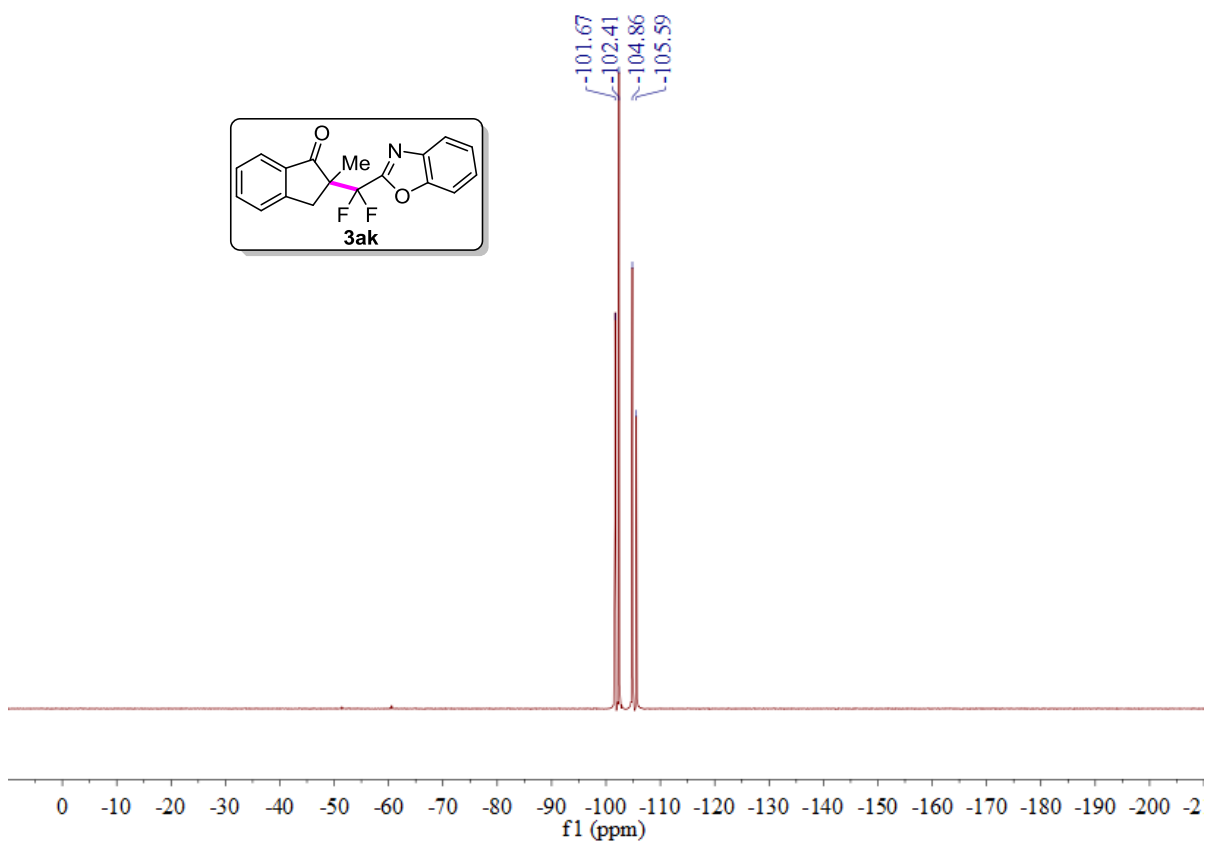

Supplementary Figure 111.  $^{19}\text{F}$  NMR of **3ak**

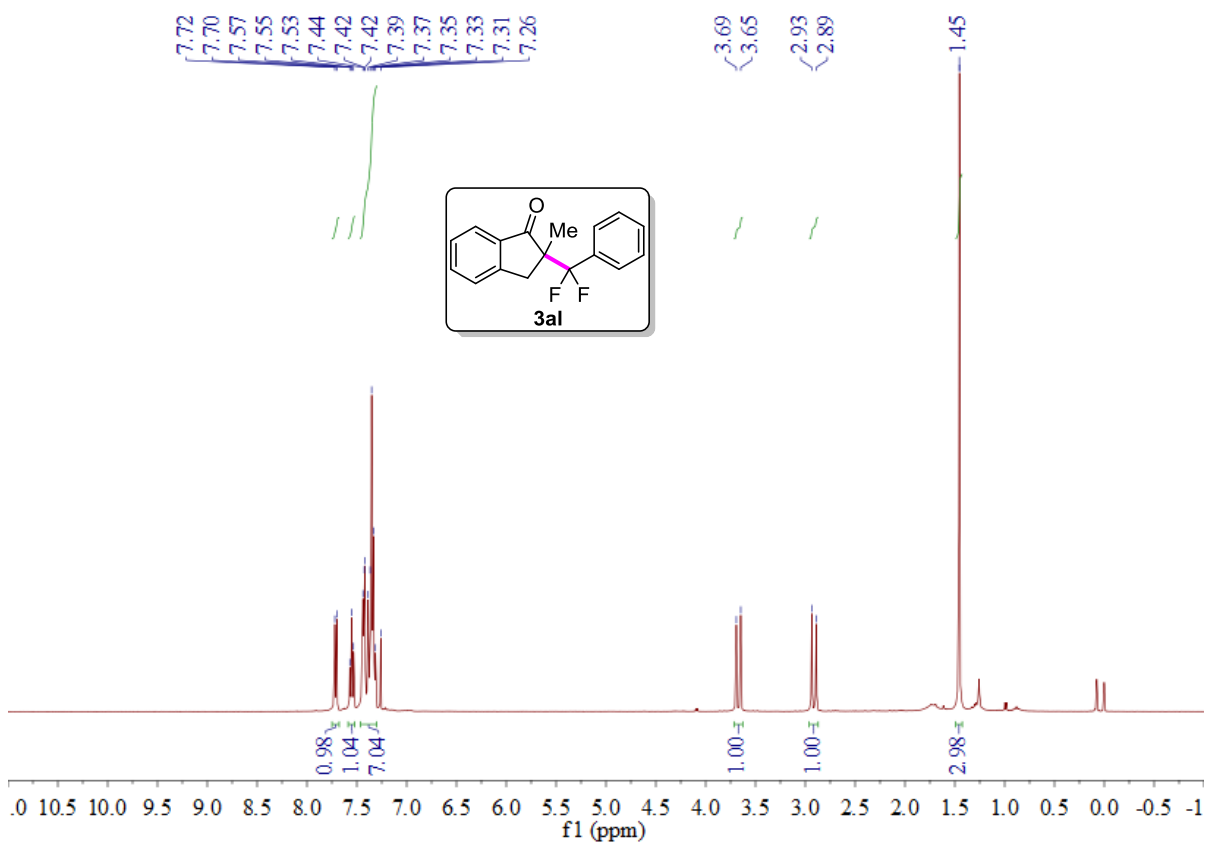

Supplementary Figure 112.  $^1\text{H}$  NMR of **3al**

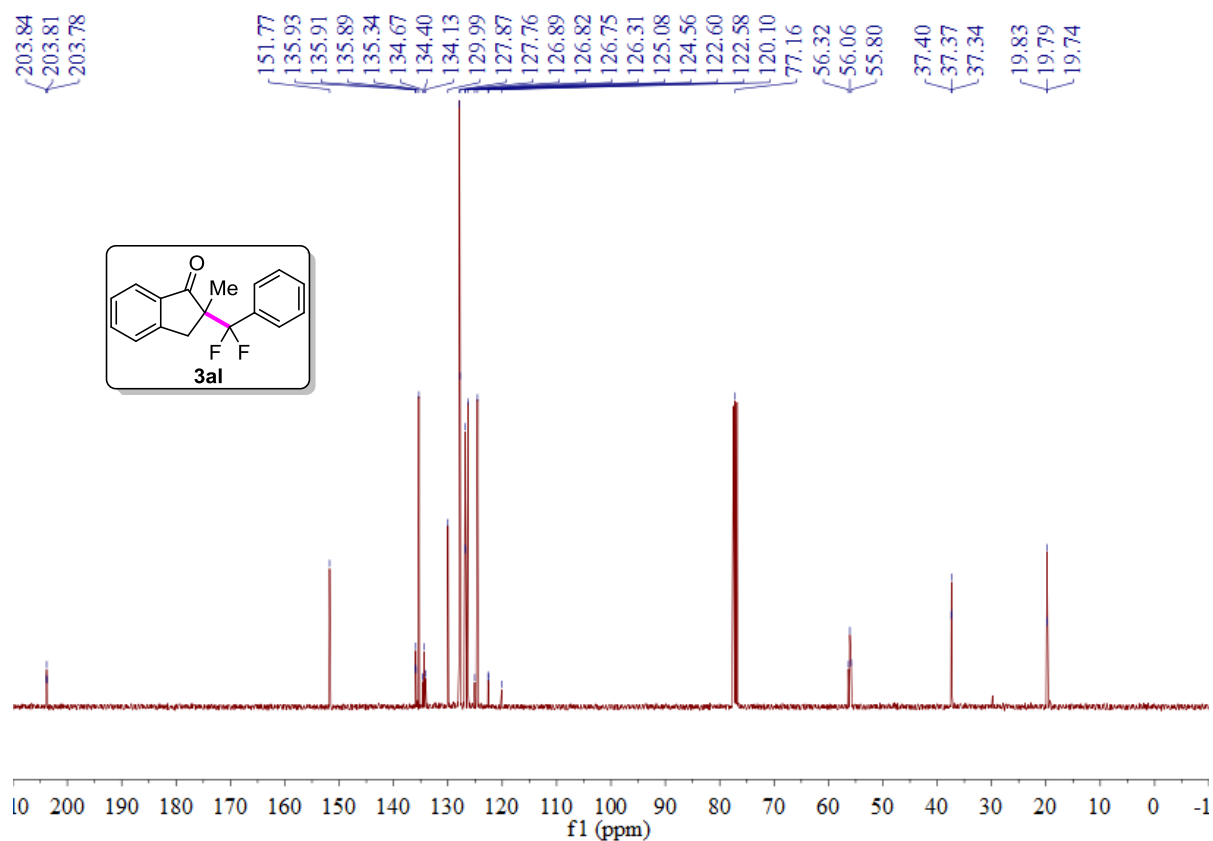

Supplementary Figure 113. <sup>13</sup>C NMR of 3al

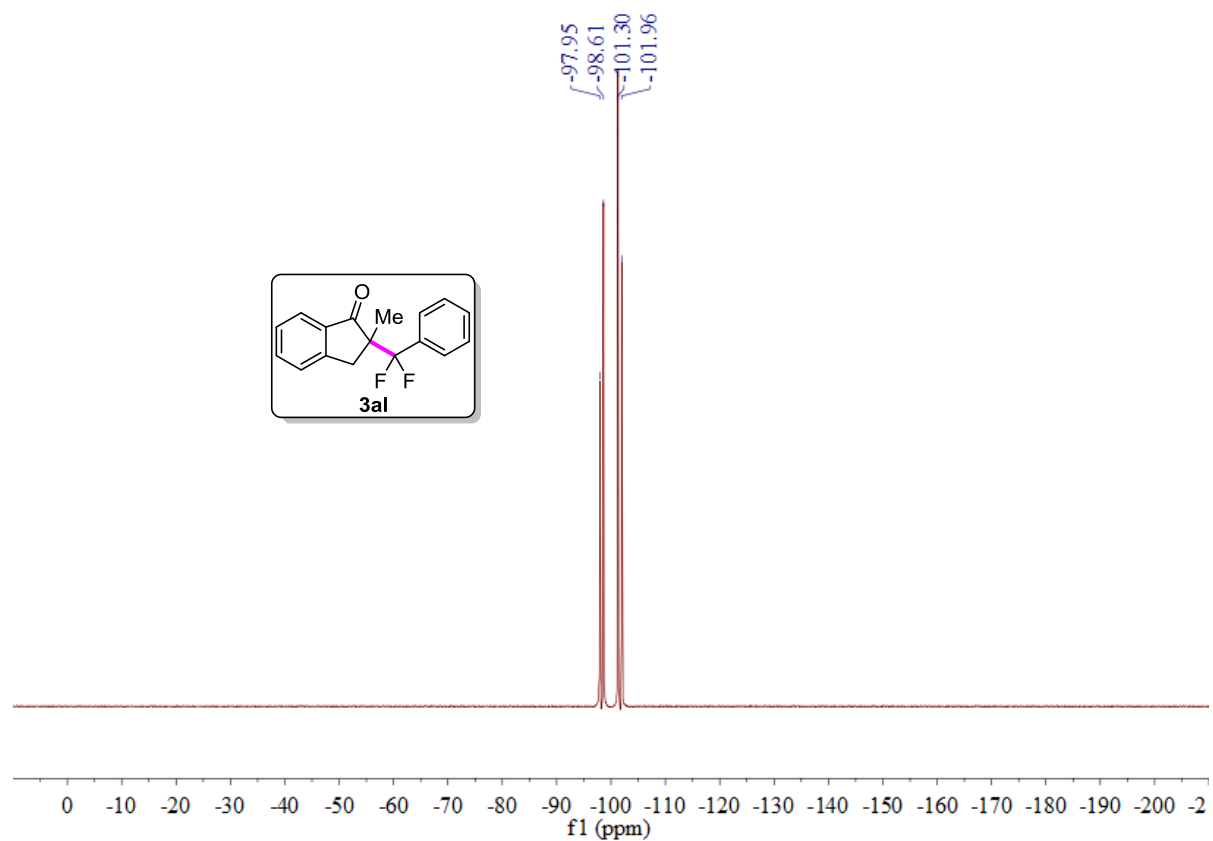

Supplementary Figure 114. <sup>19</sup>F NMR of 3al

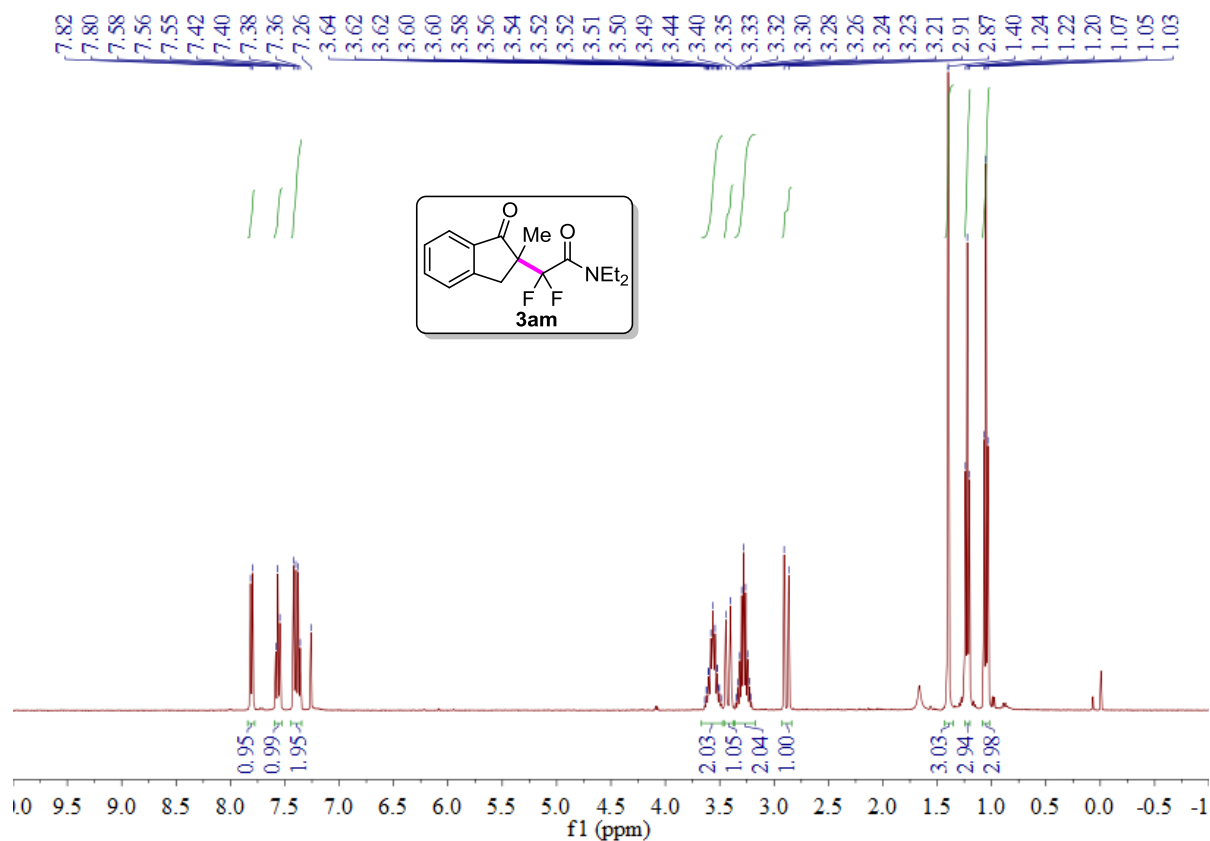

Supplementary Figure 115.  $^1\text{H}$  NMR of 3am

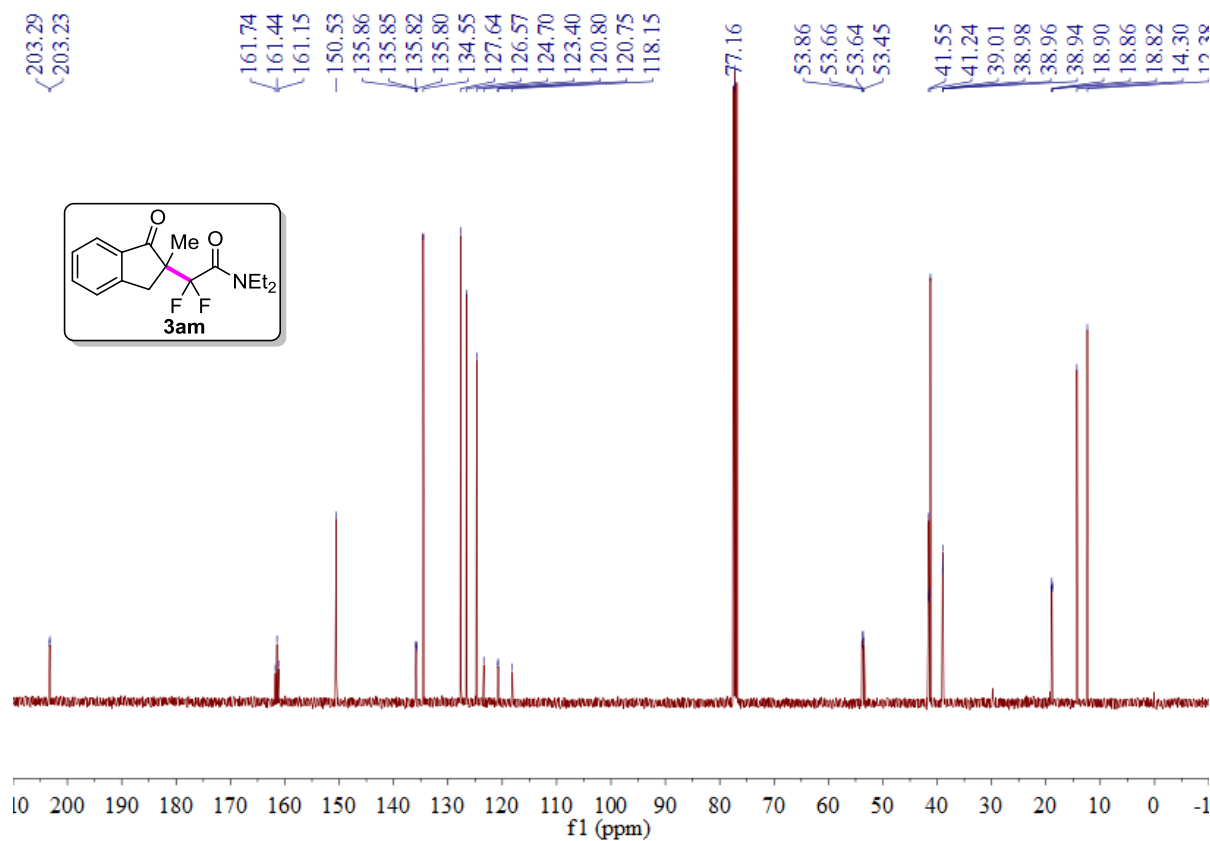

Supplementary Figure 116.  $^{13}\text{C}$  NMR of 3am

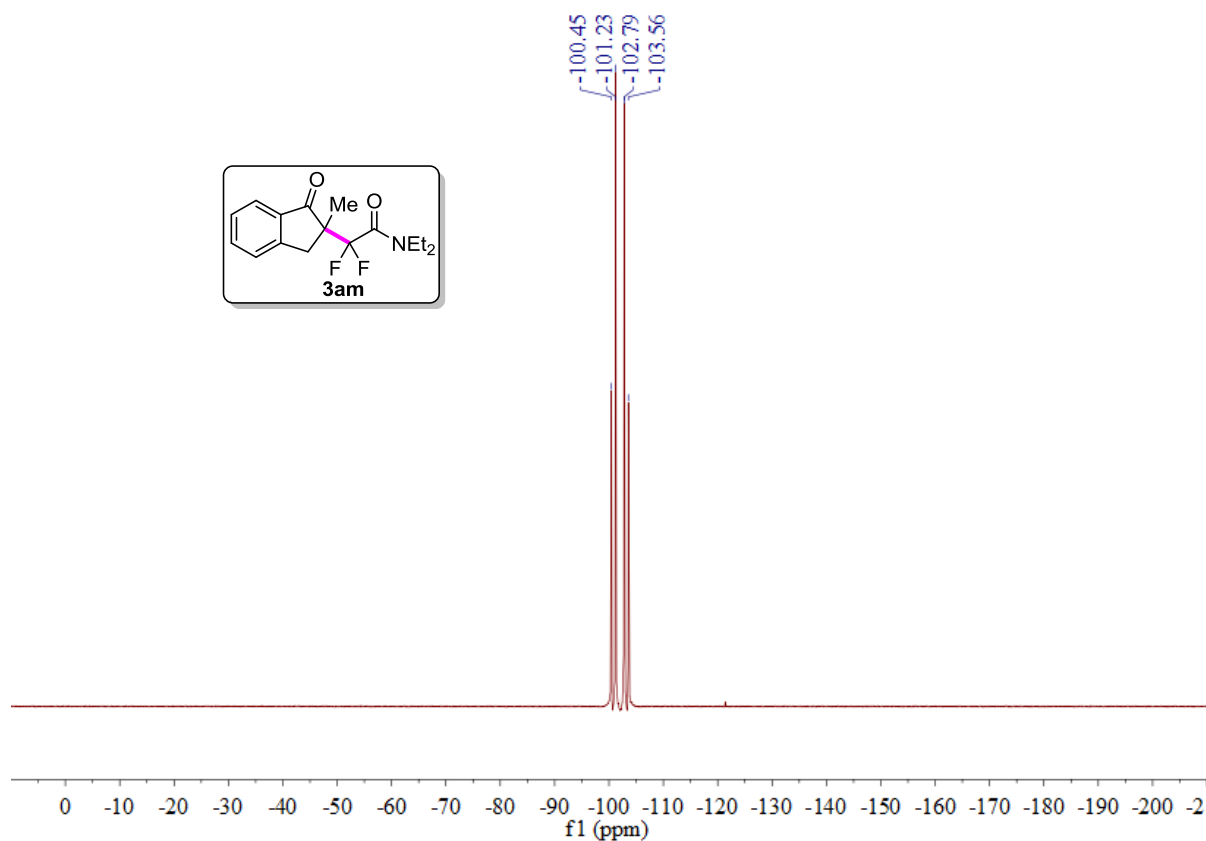

Supplementary Figure 117.  $^{19}\text{F}$  NMR of **3am**

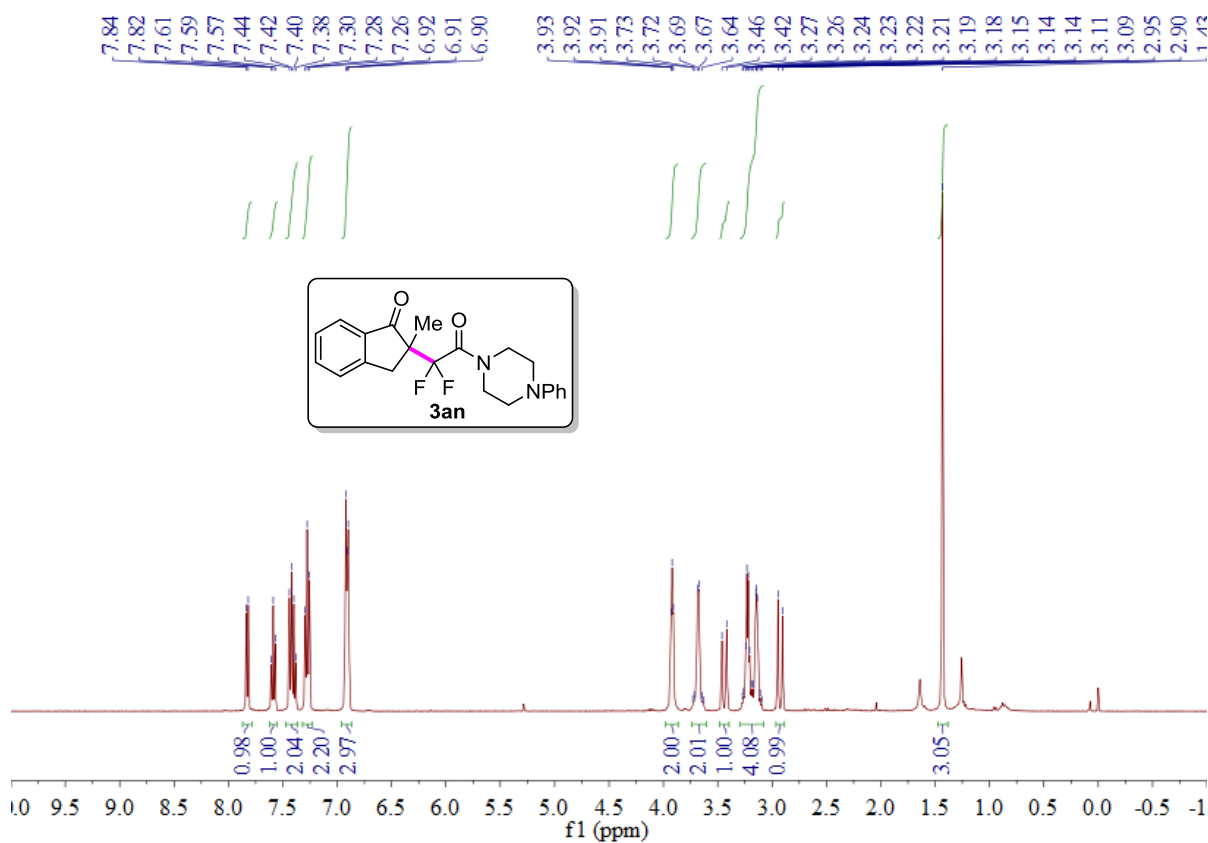

Supplementary Figure 118.  $^1\text{H}$  NMR of **3an**

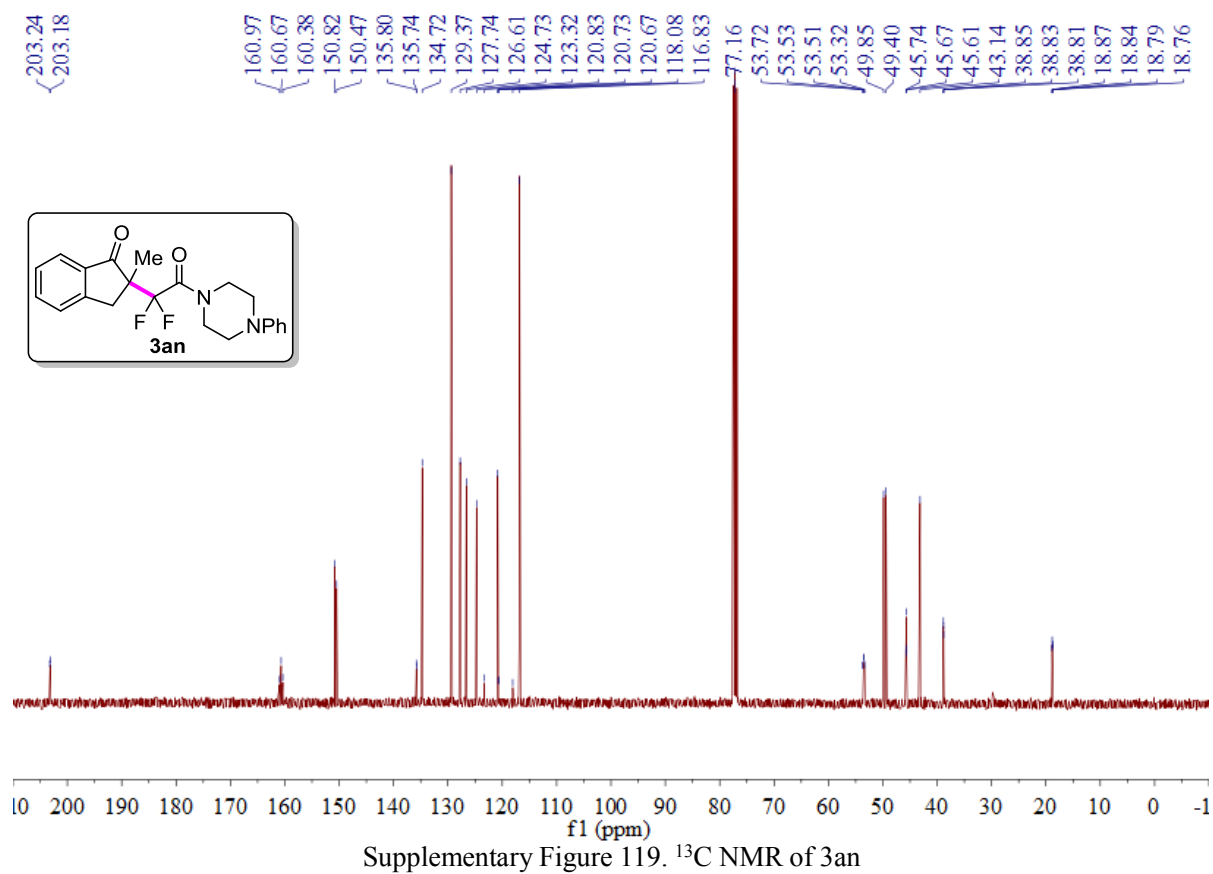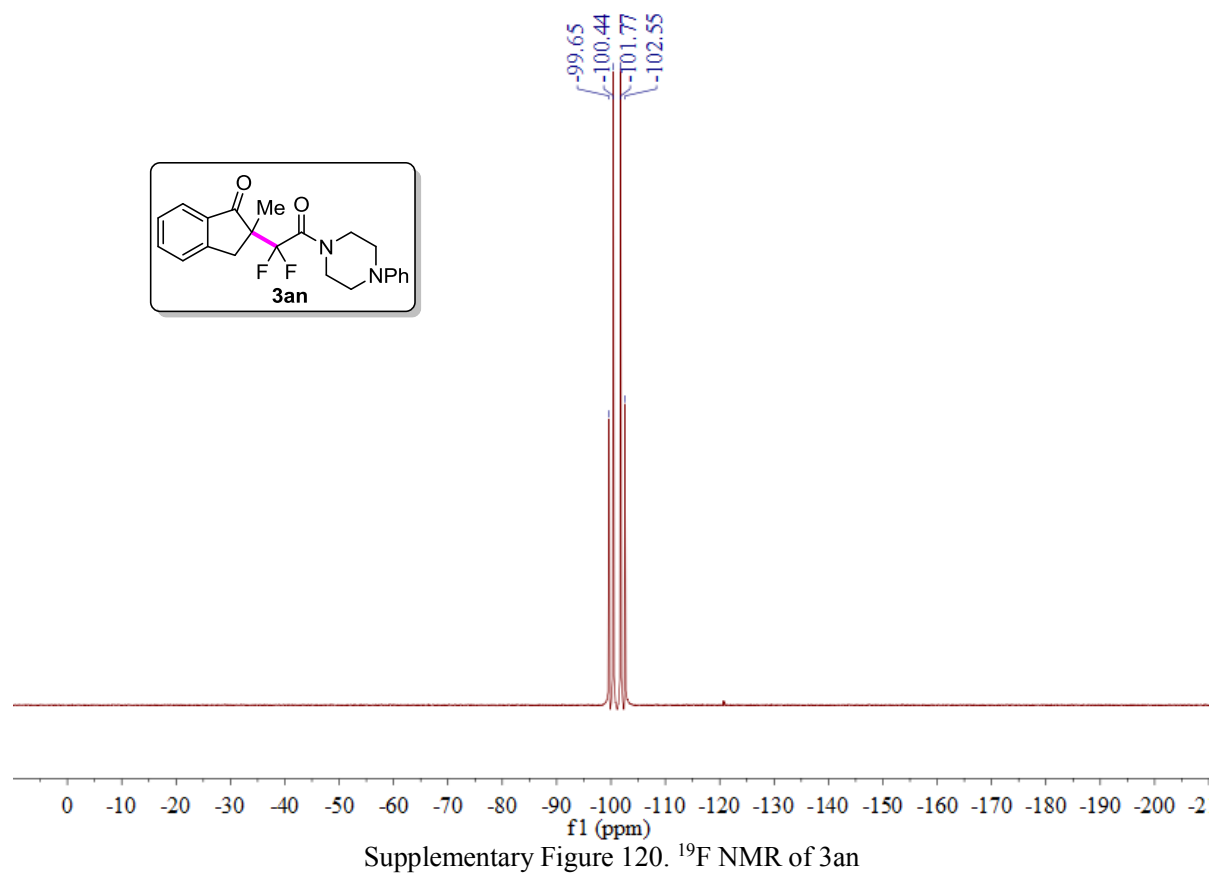

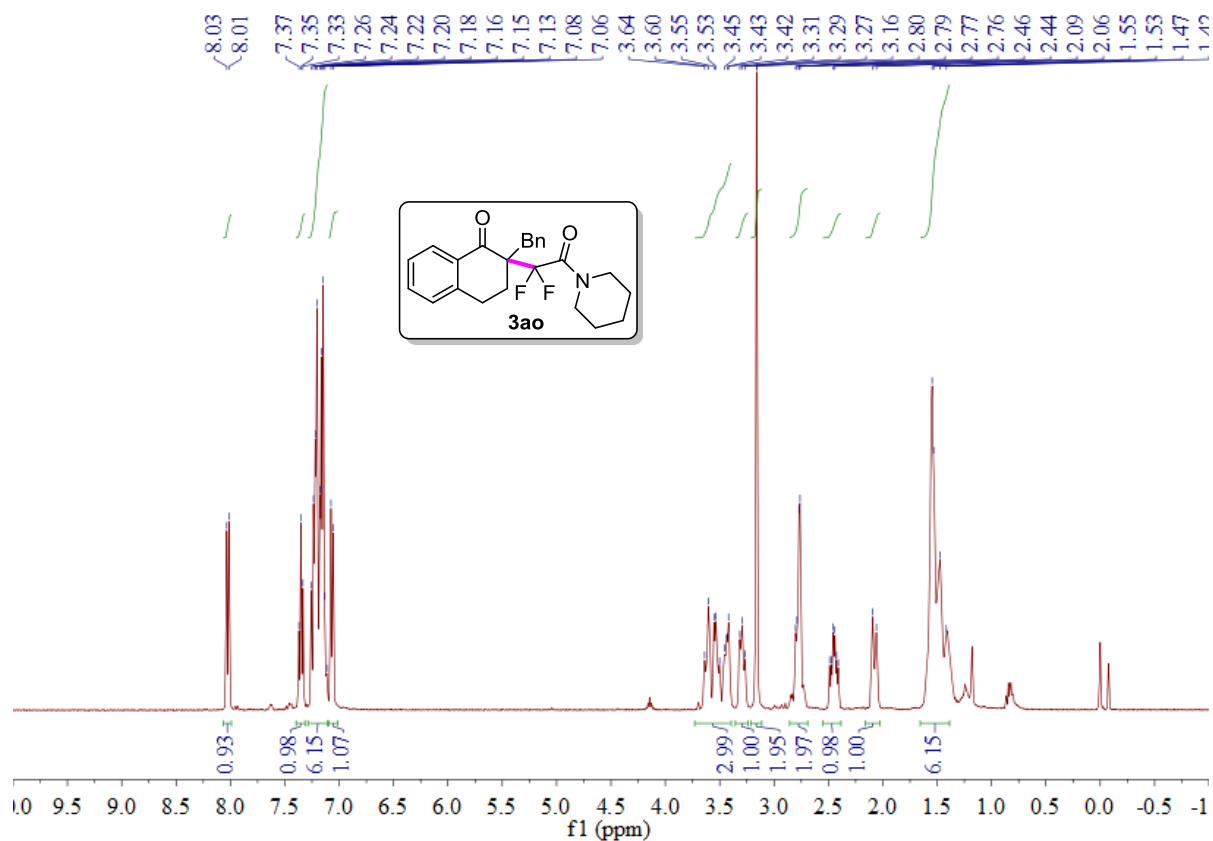

Supplementary Figure 121. <sup>1</sup>H NMR of 3ao

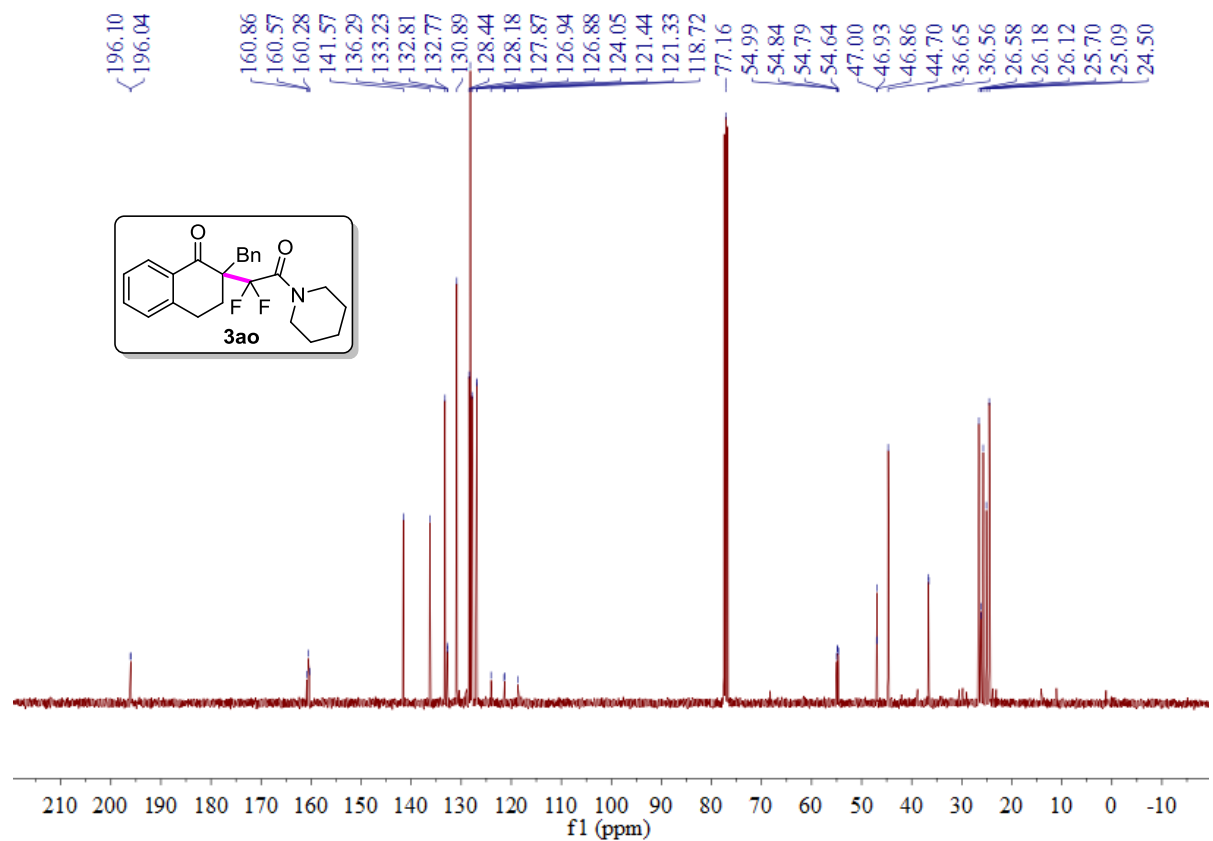

Supplementary Figure 122. <sup>13</sup>C NMR of 3ao

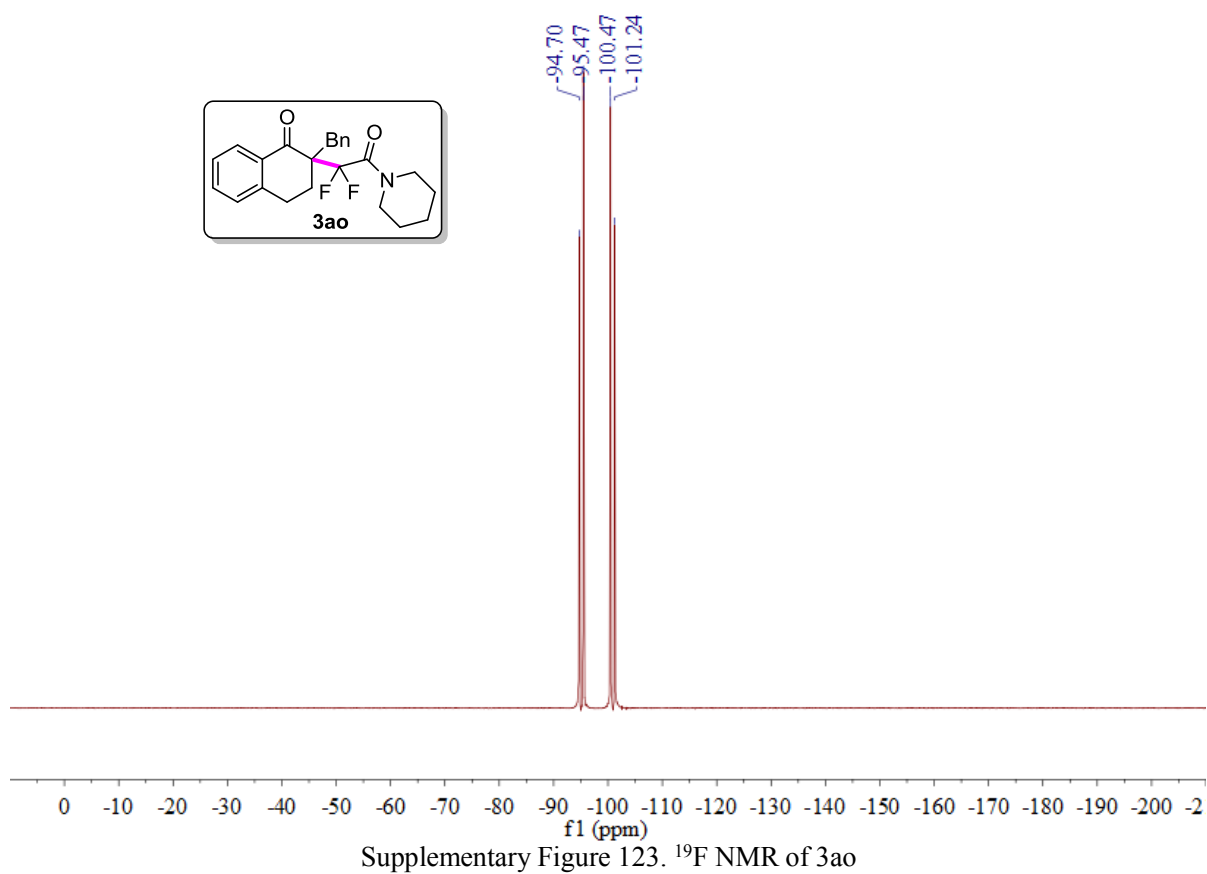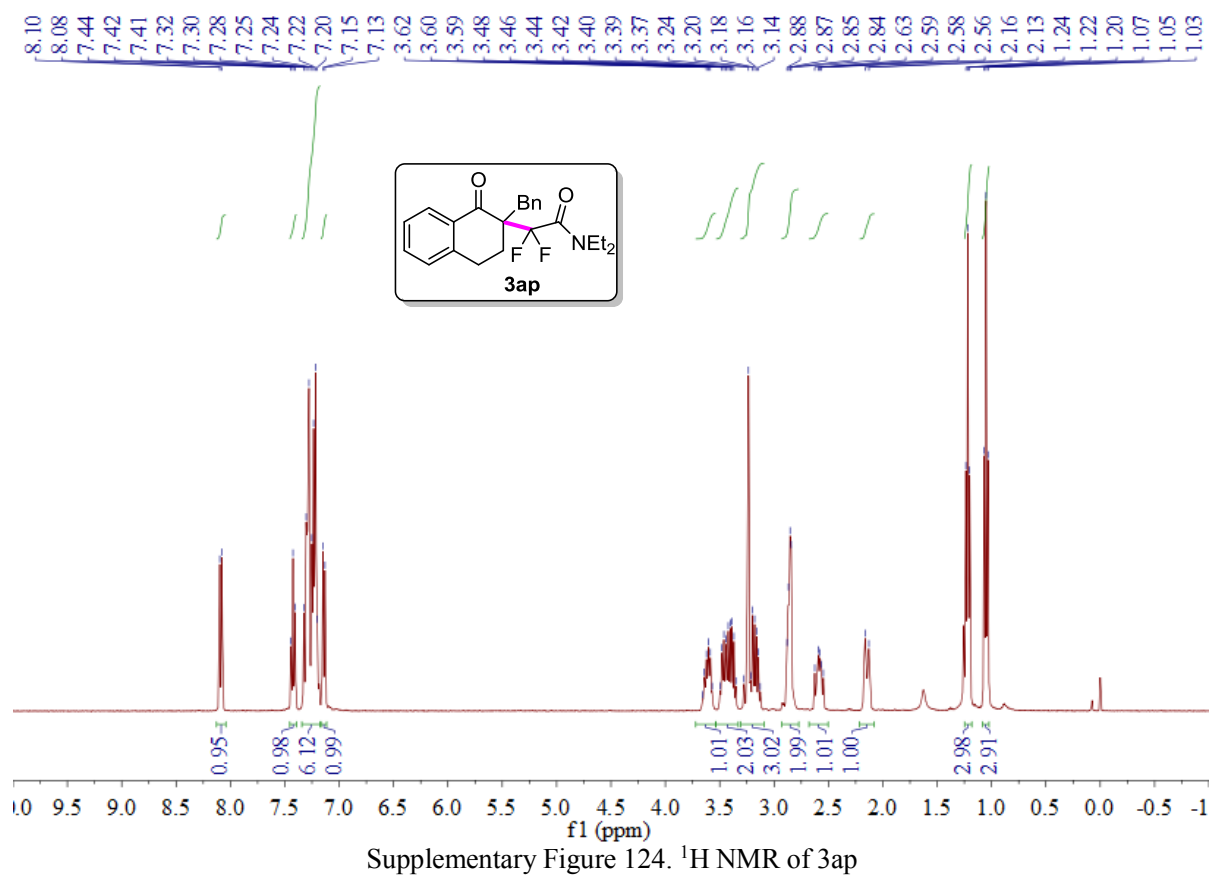

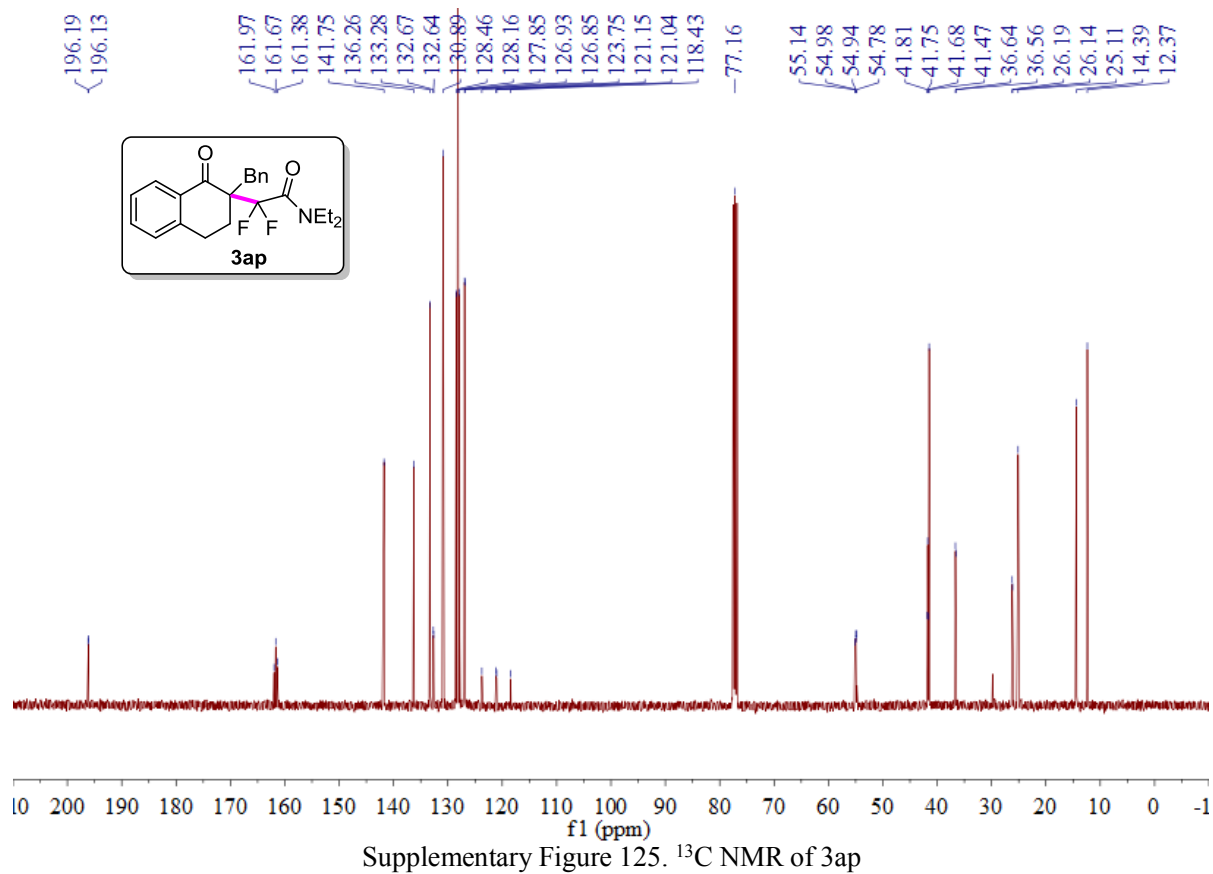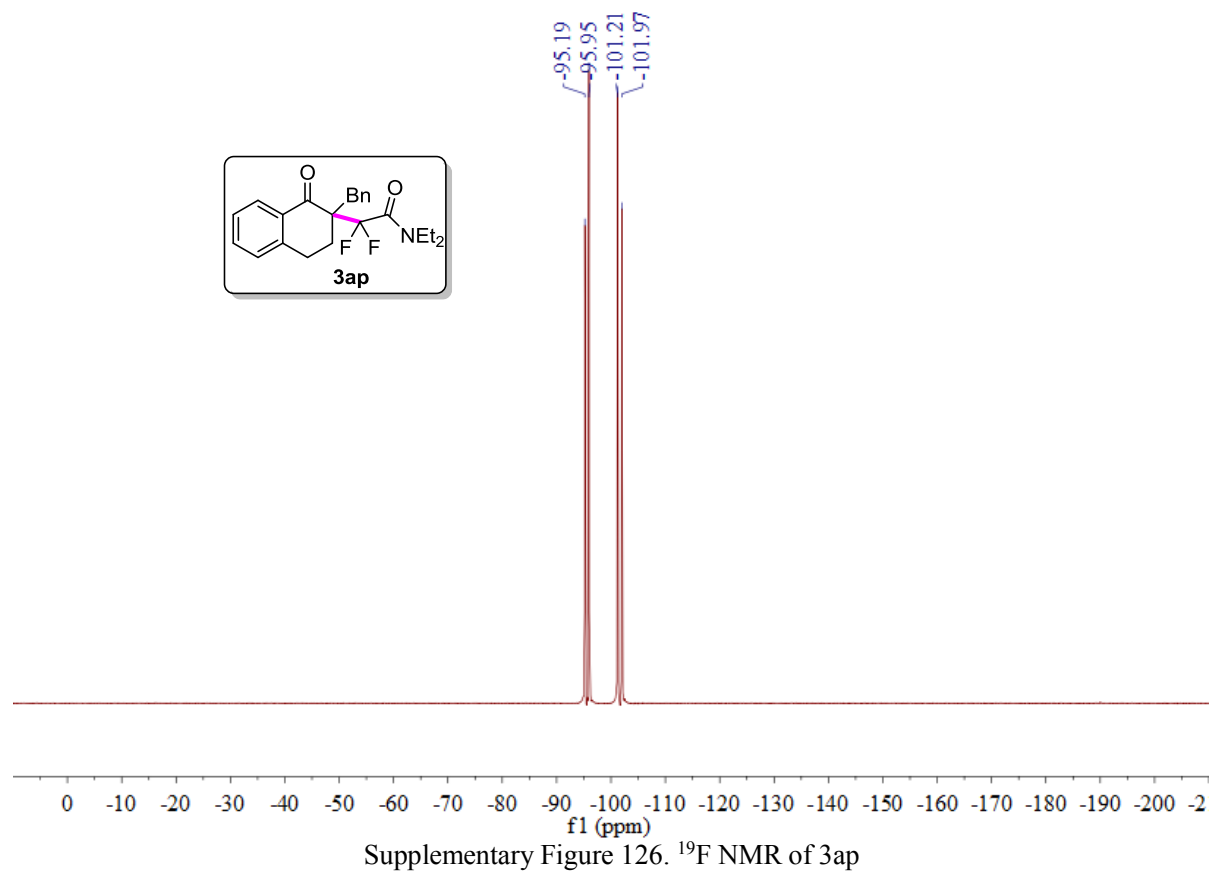



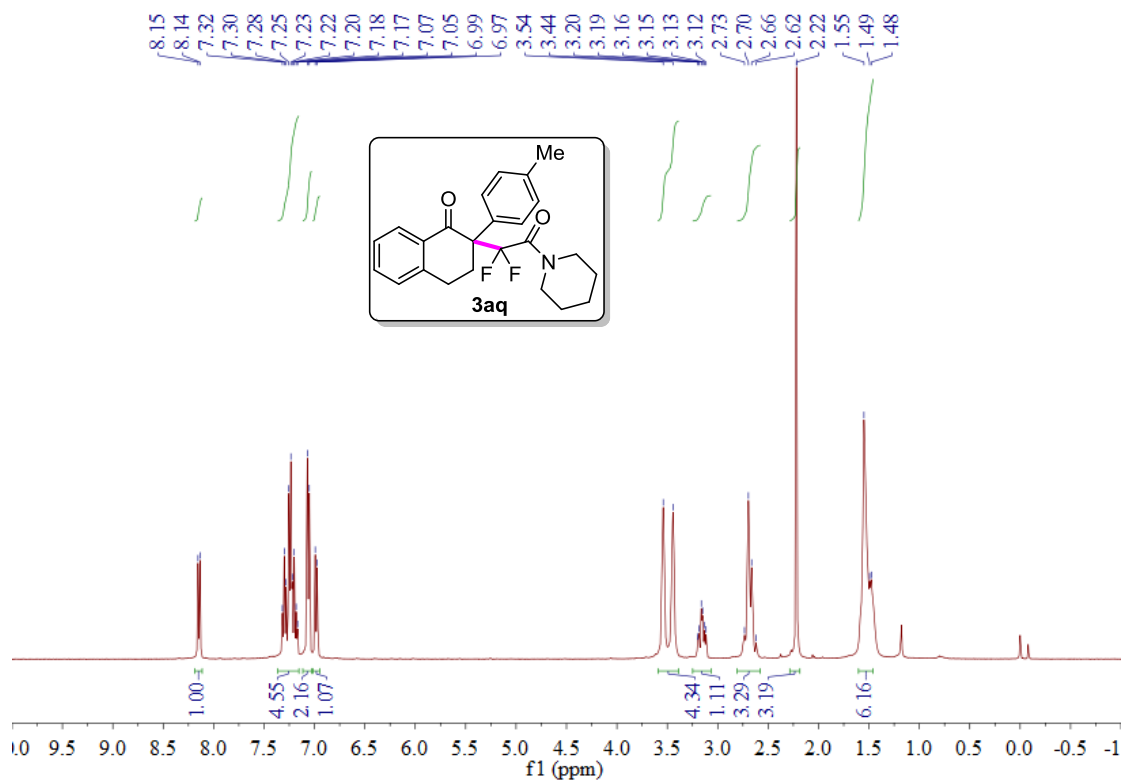

Supplementary Figure 127. <sup>1</sup>H NMR of 3aq

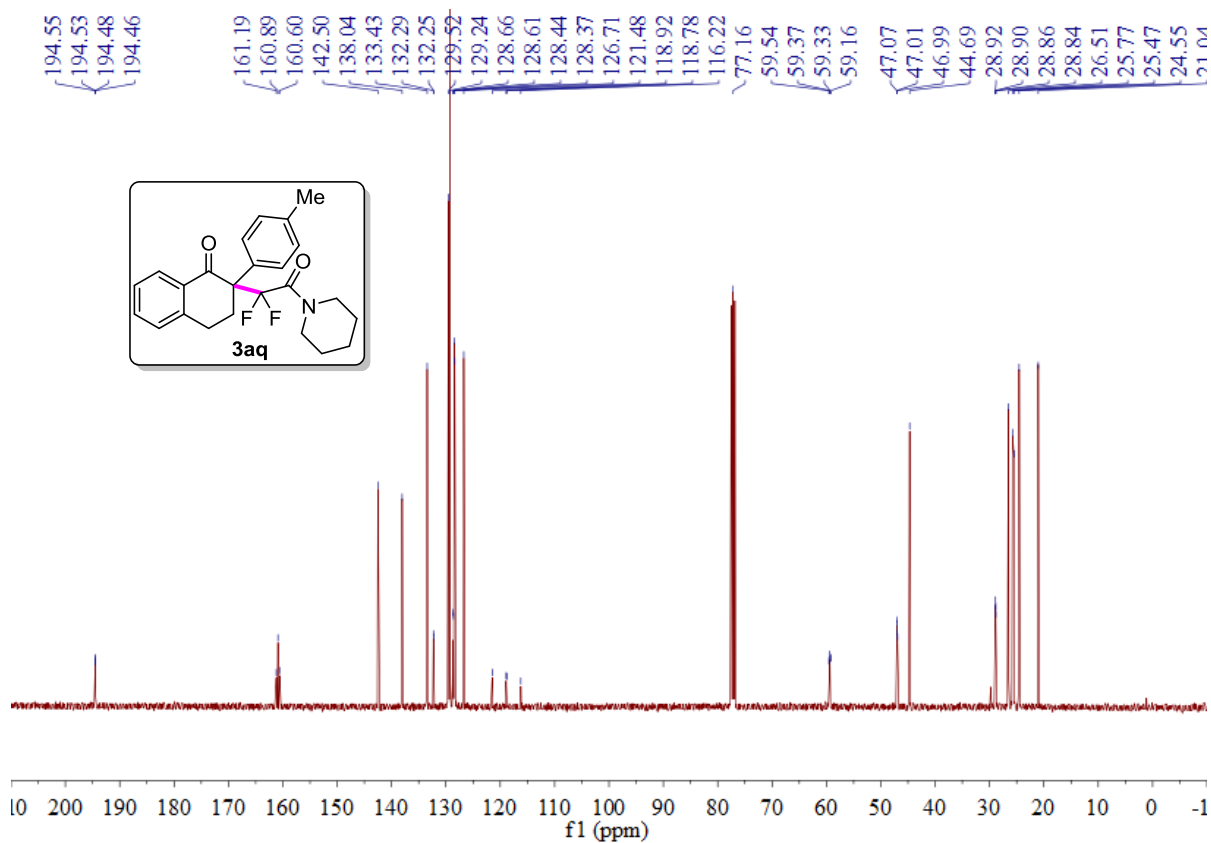

Supplementary Figure 128. <sup>13</sup>C NMR of 3aq

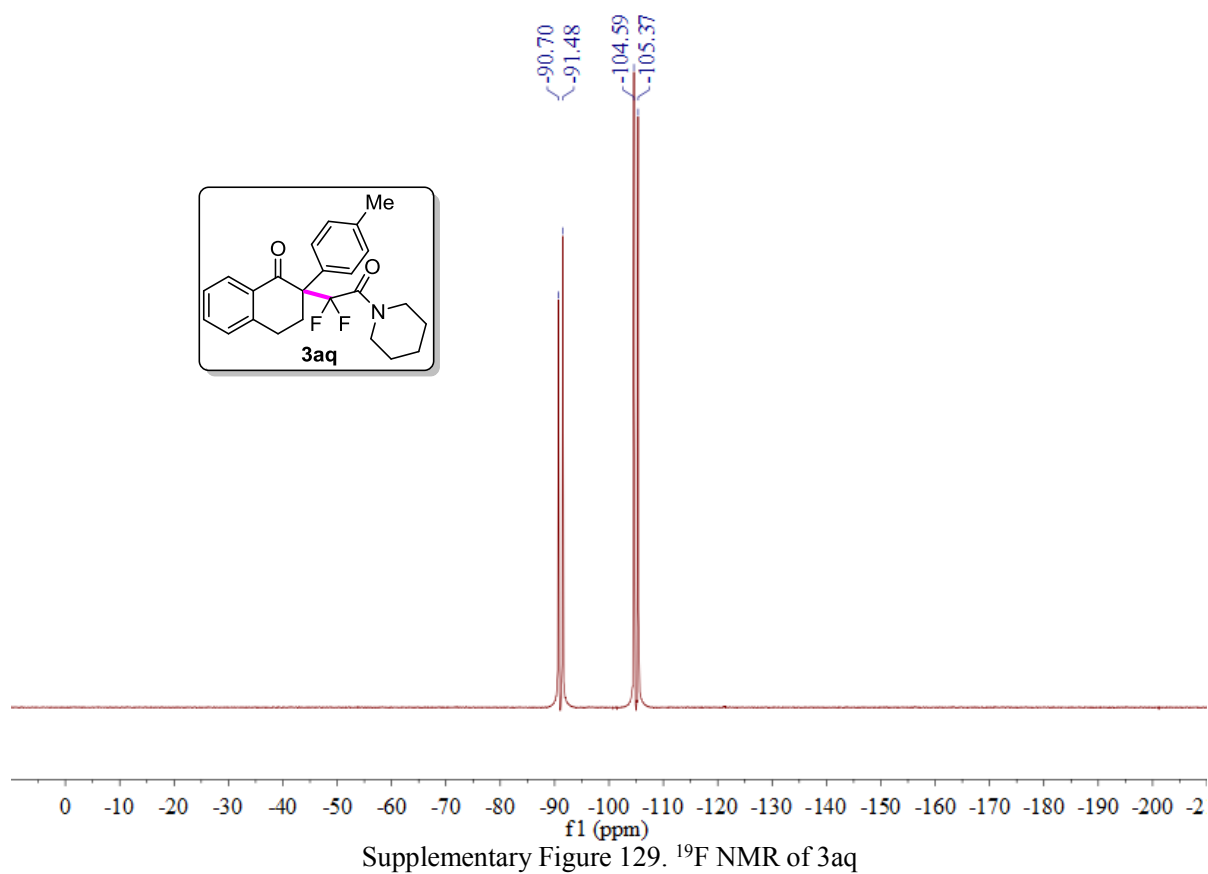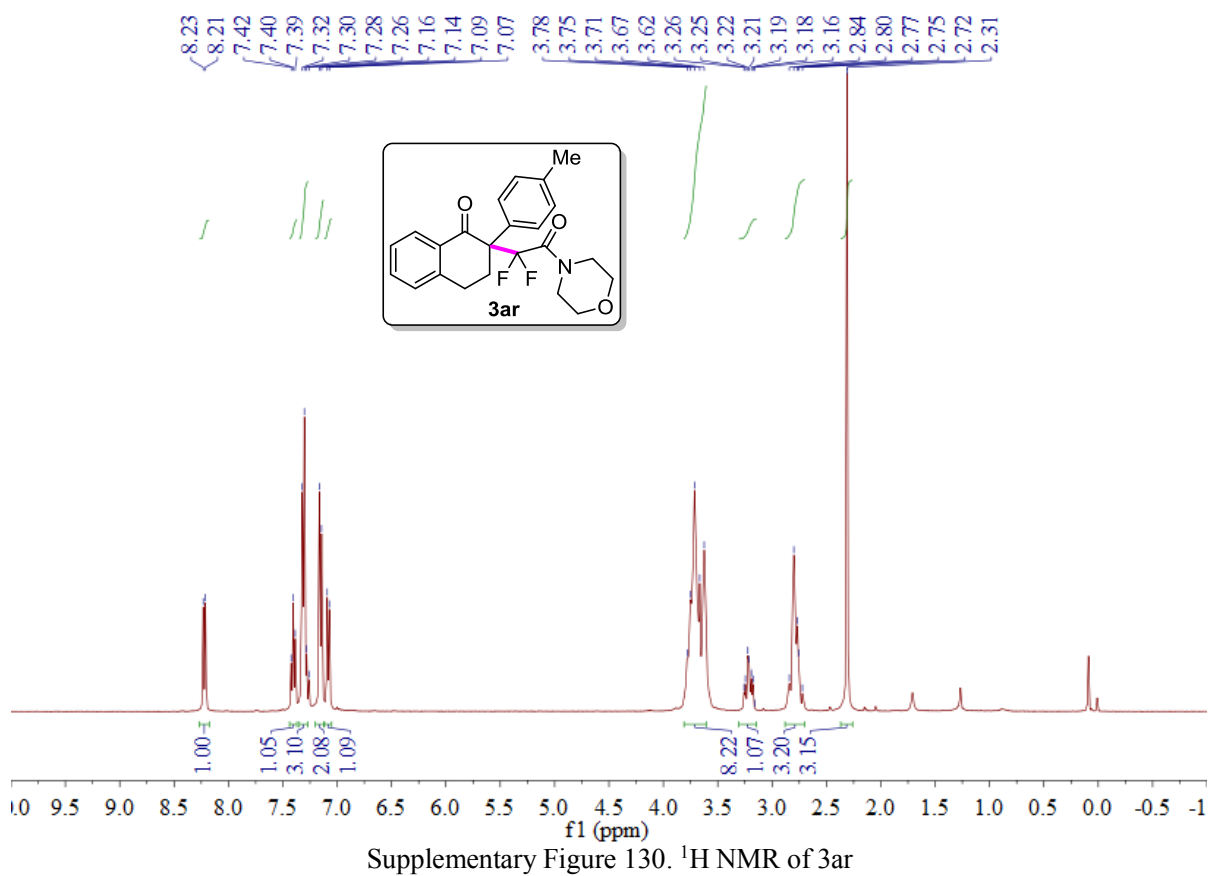

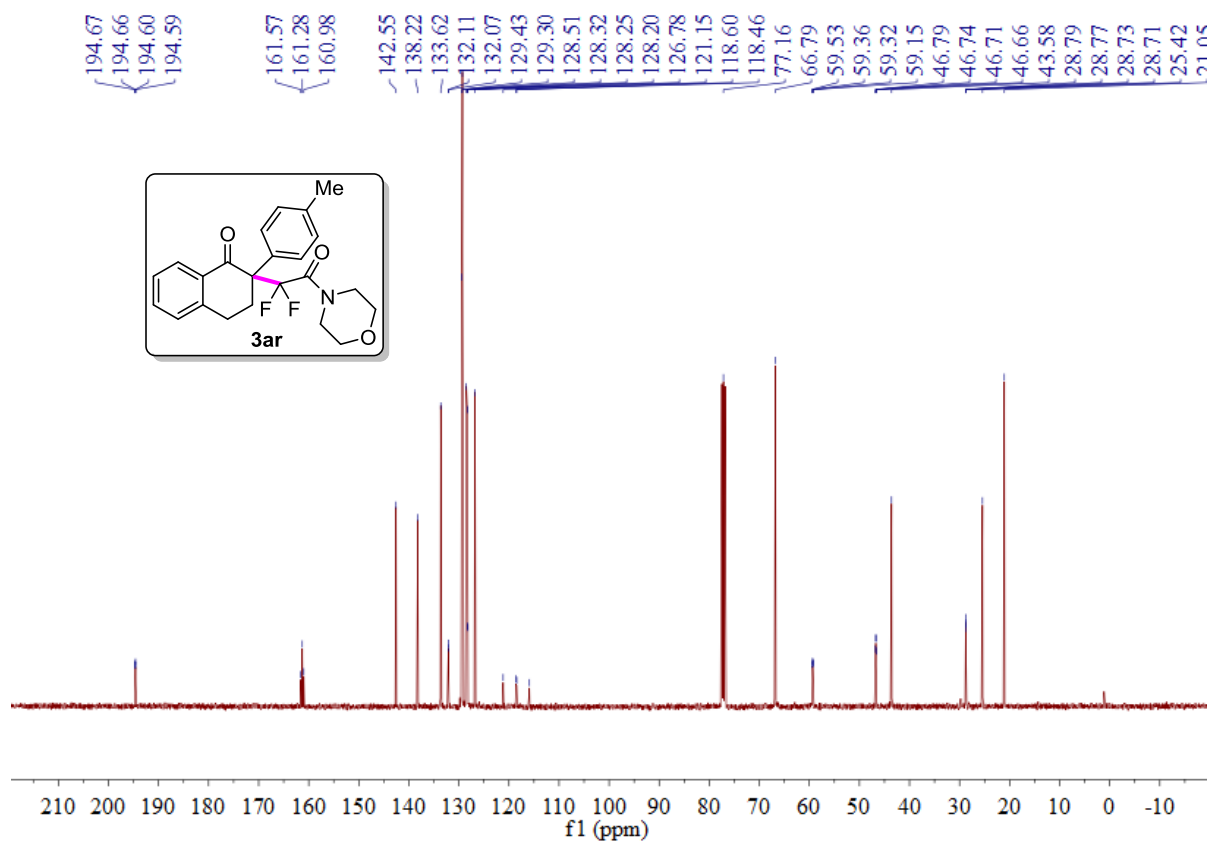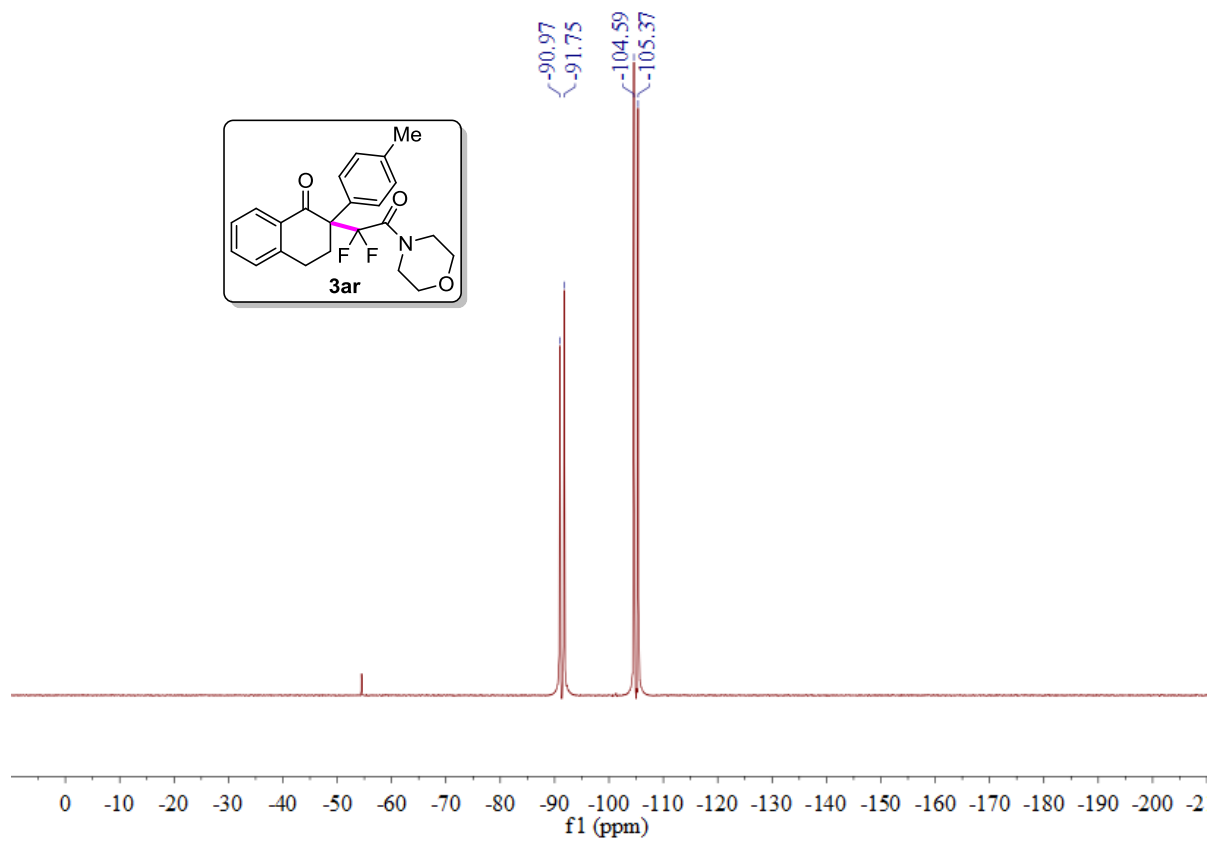

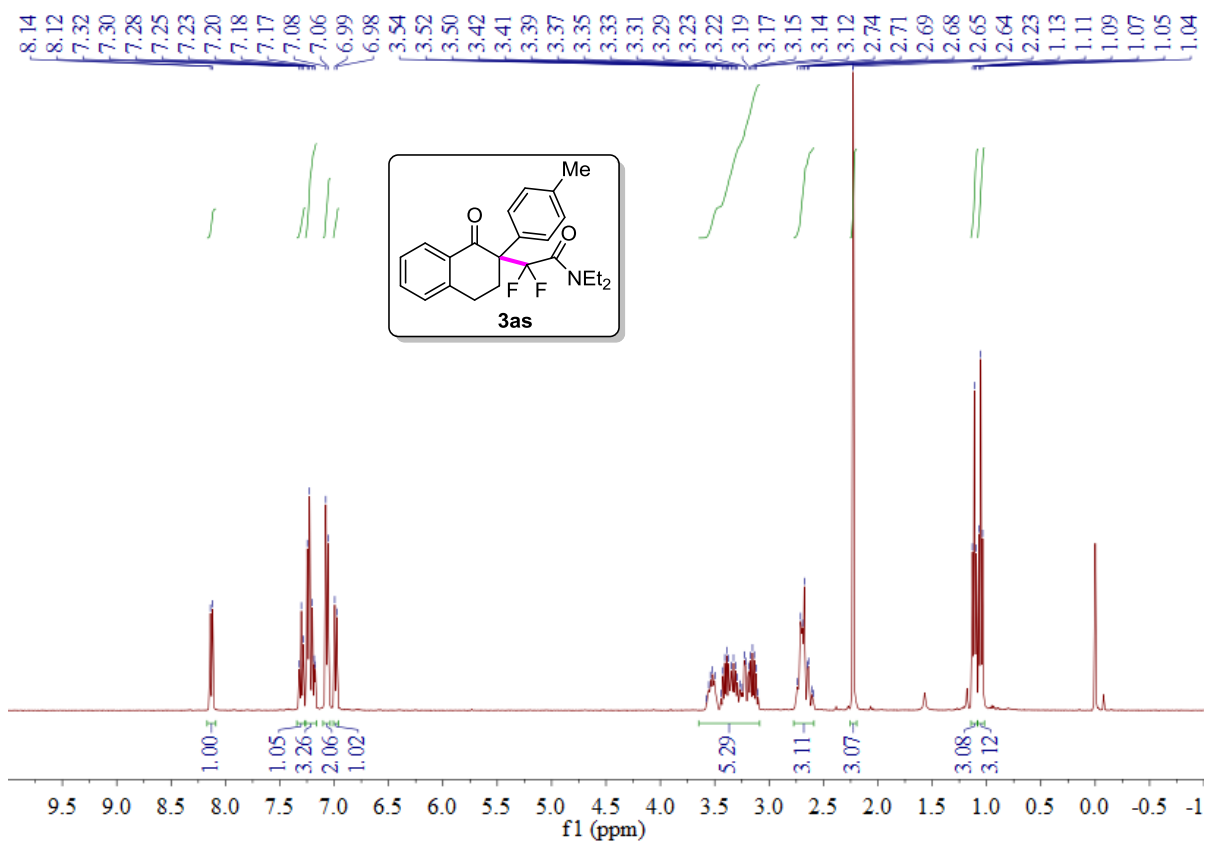

Supplementary Figure 133. <sup>1</sup>H NMR of **3as**

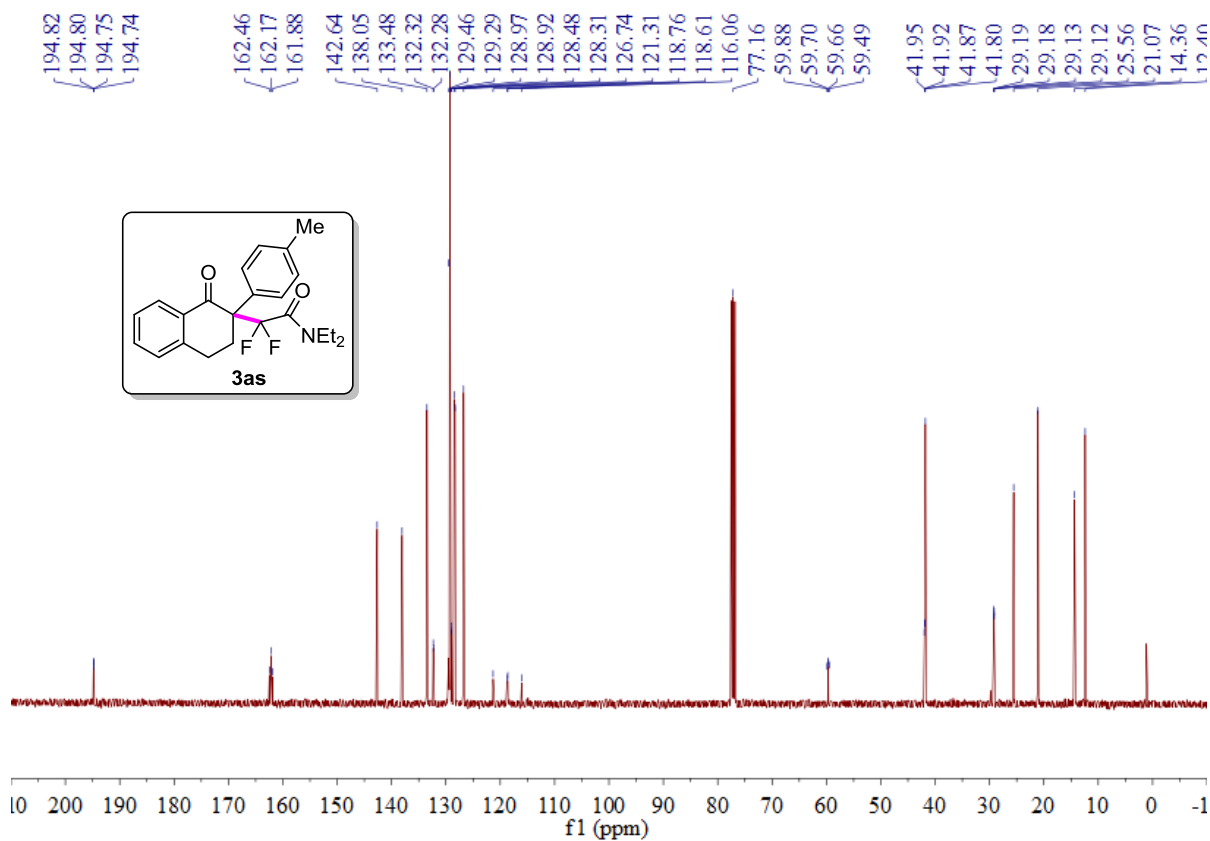

Supplementary Figure 134. <sup>13</sup>C NMR of **3as**

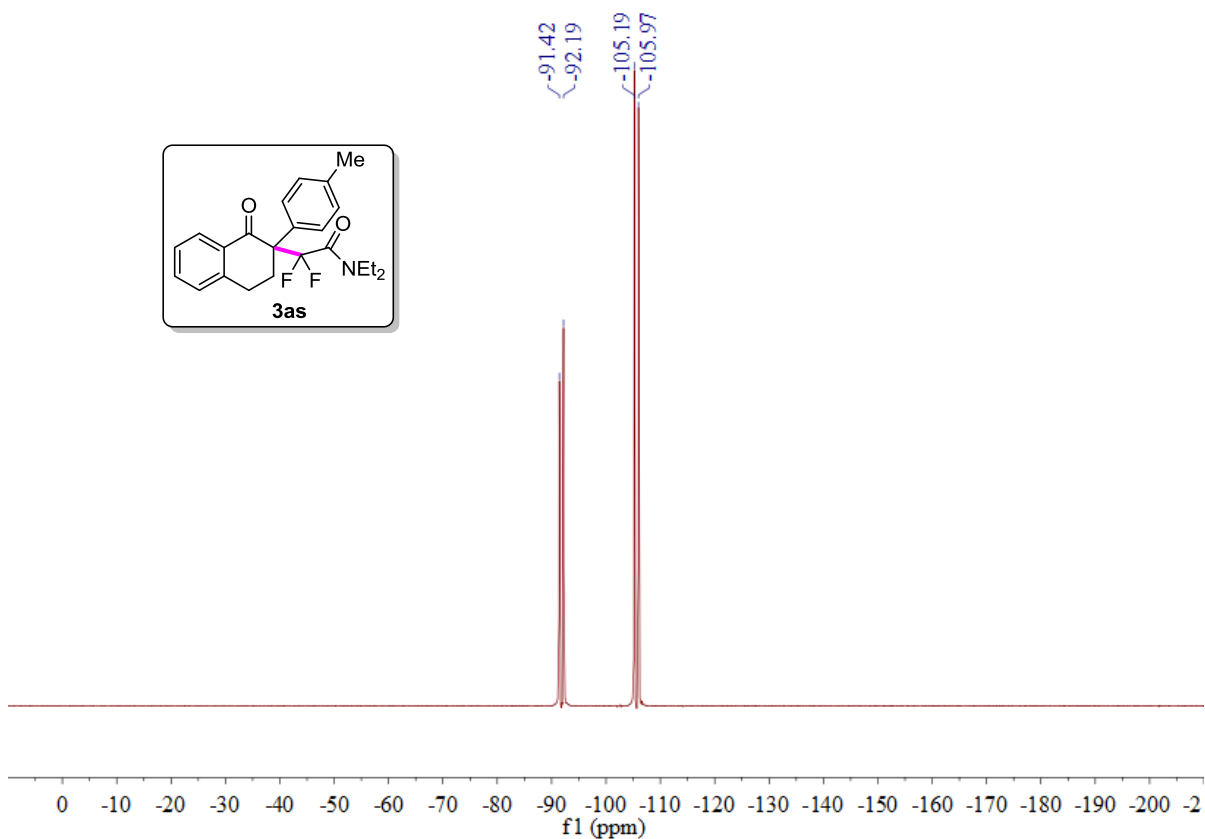

Supplementary Figure 135.  $^{19}\text{F}$  NMR of **3as**

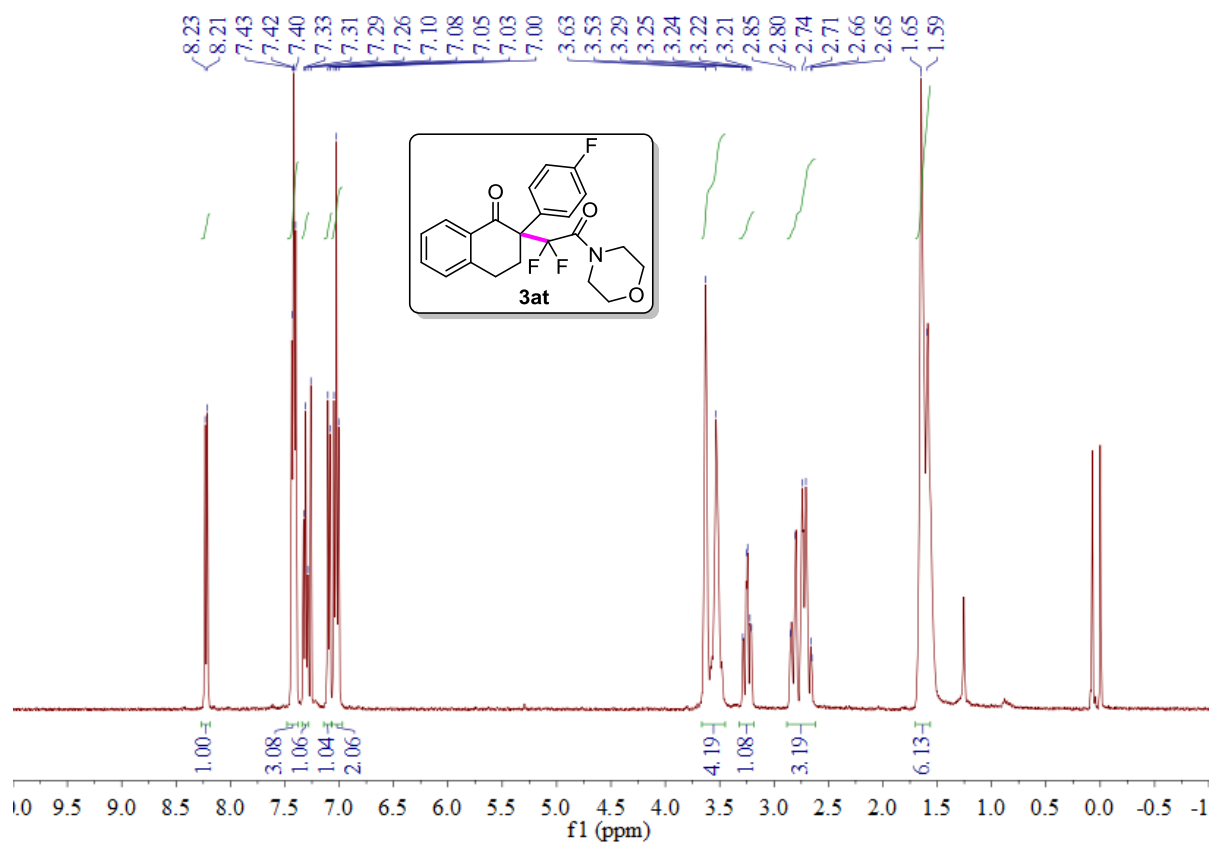

Supplementary Figure 136.  $^1\text{H}$  NMR of **3at**

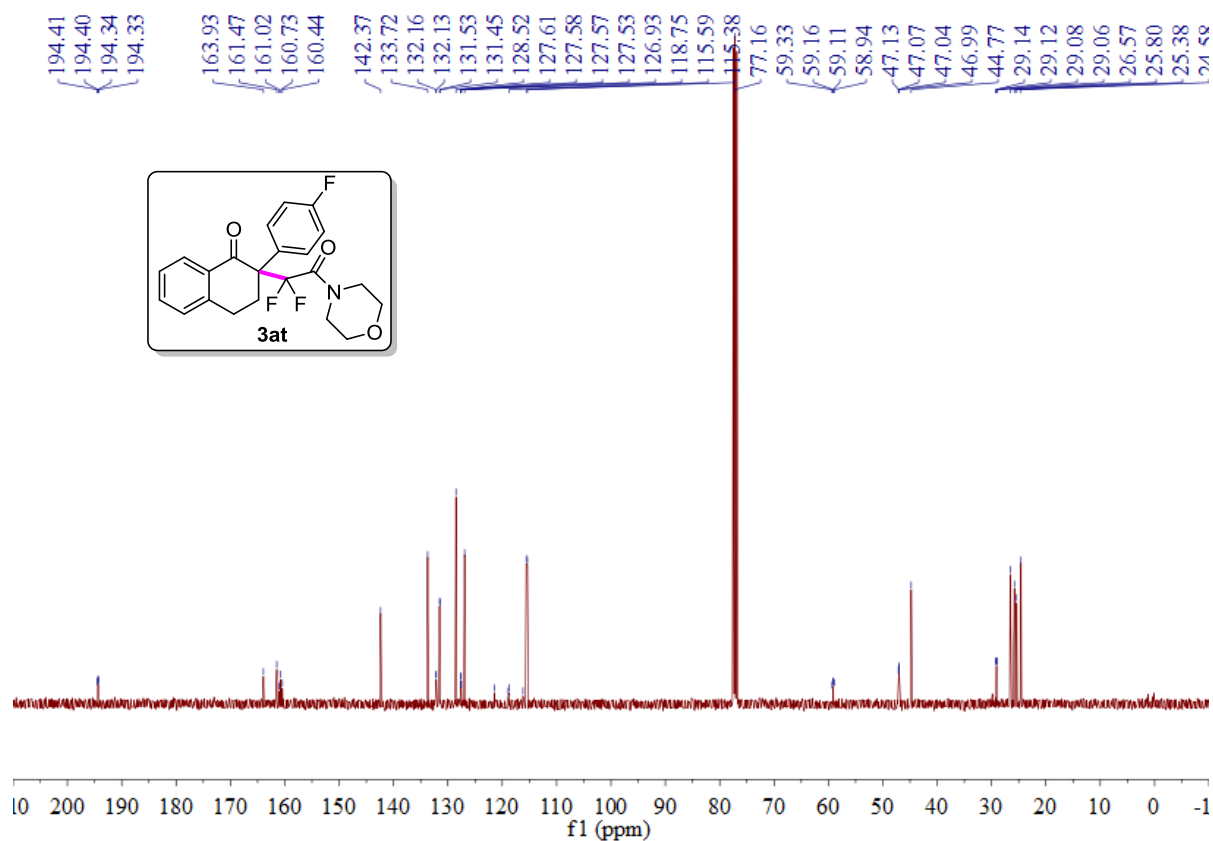

Supplementary Figure 137. <sup>13</sup>C NMR of 3at

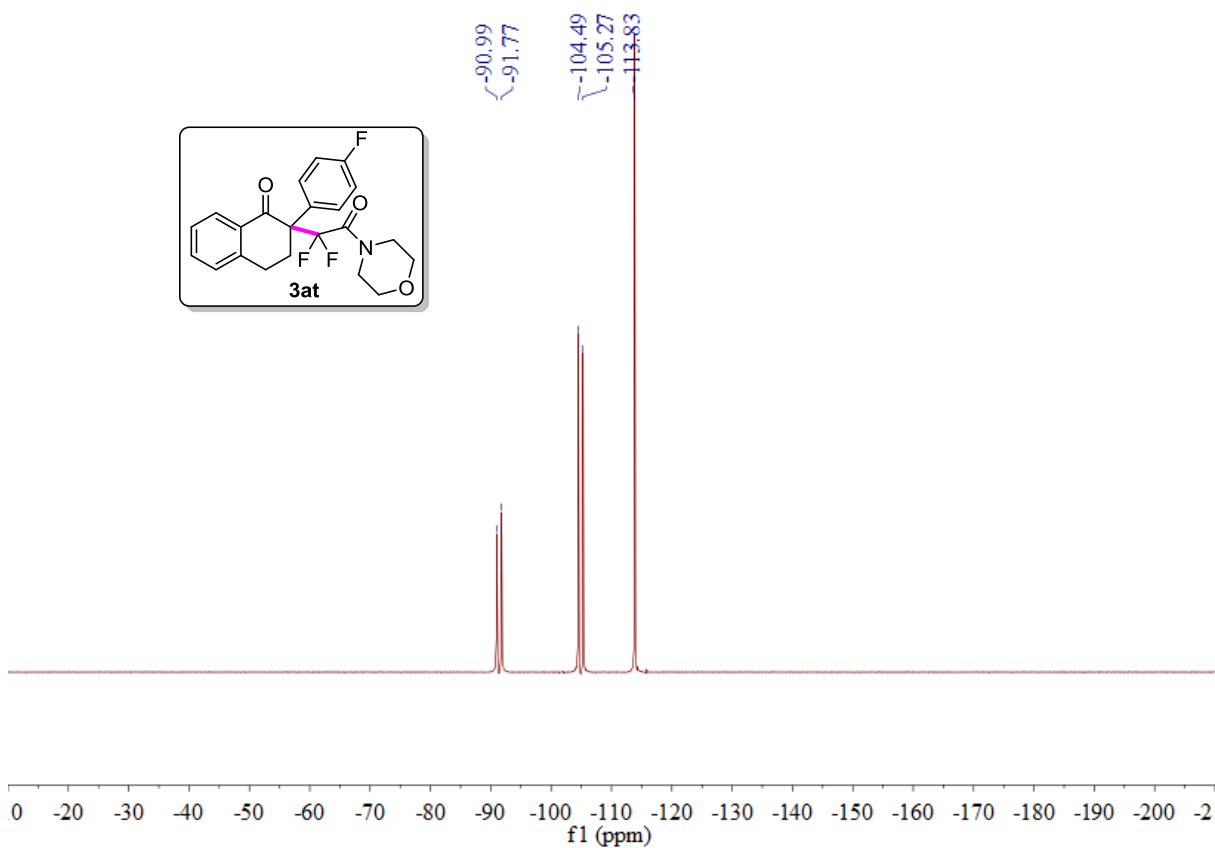

Supplementary Figure 138. <sup>19</sup>F NMR of 3at

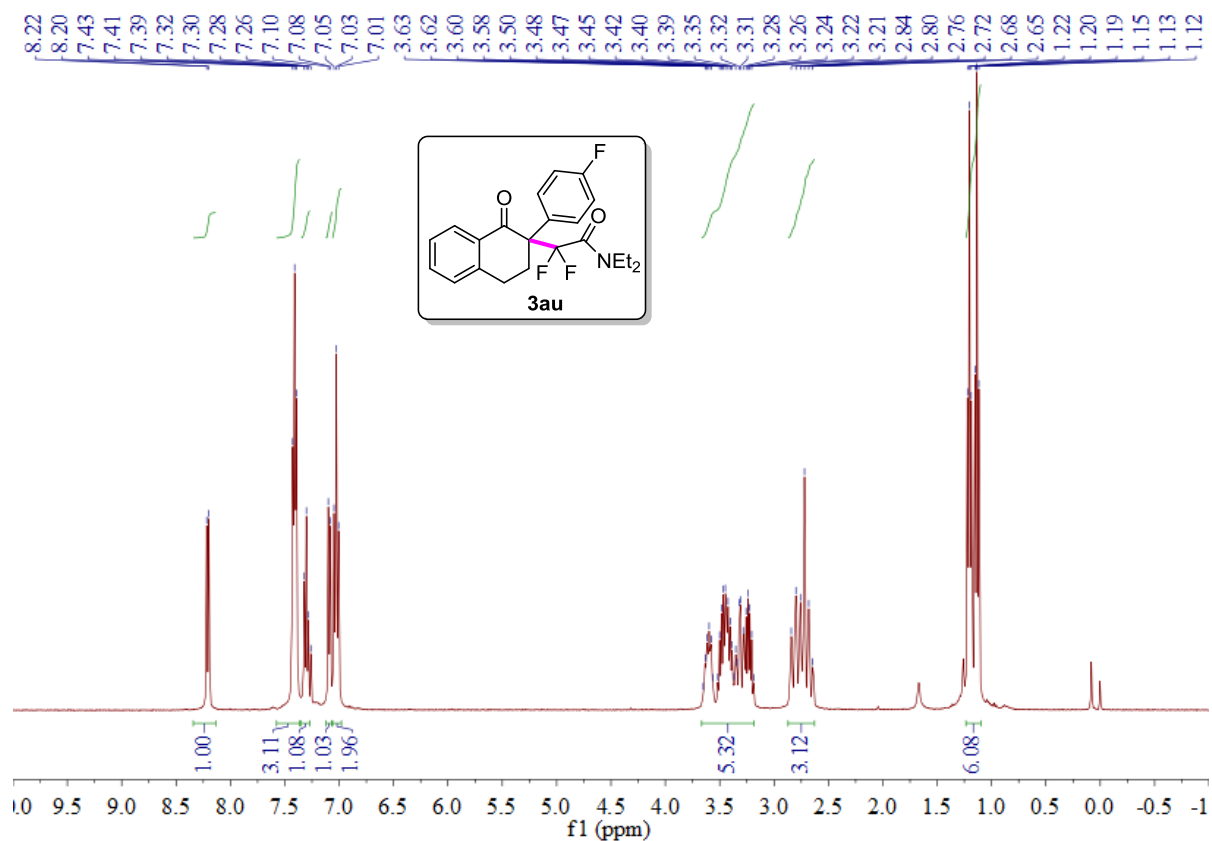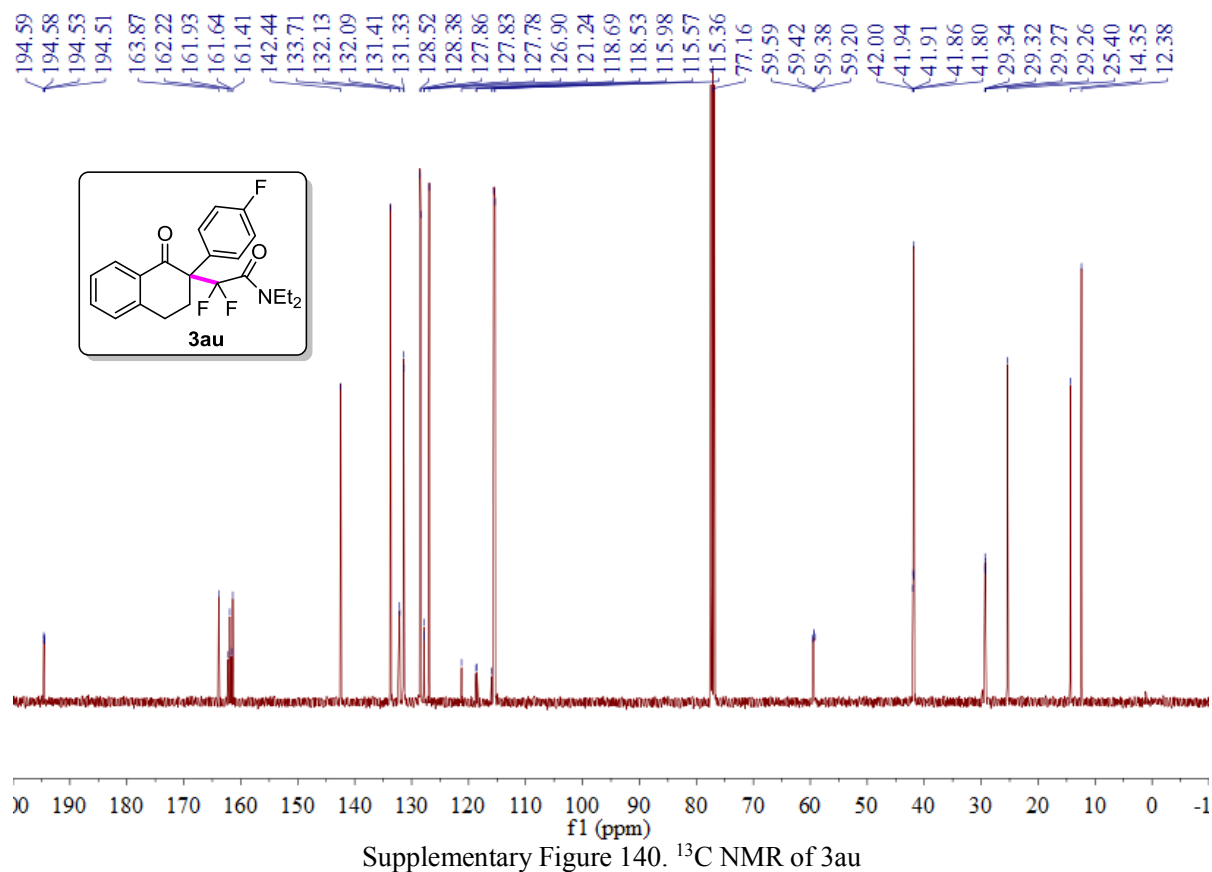

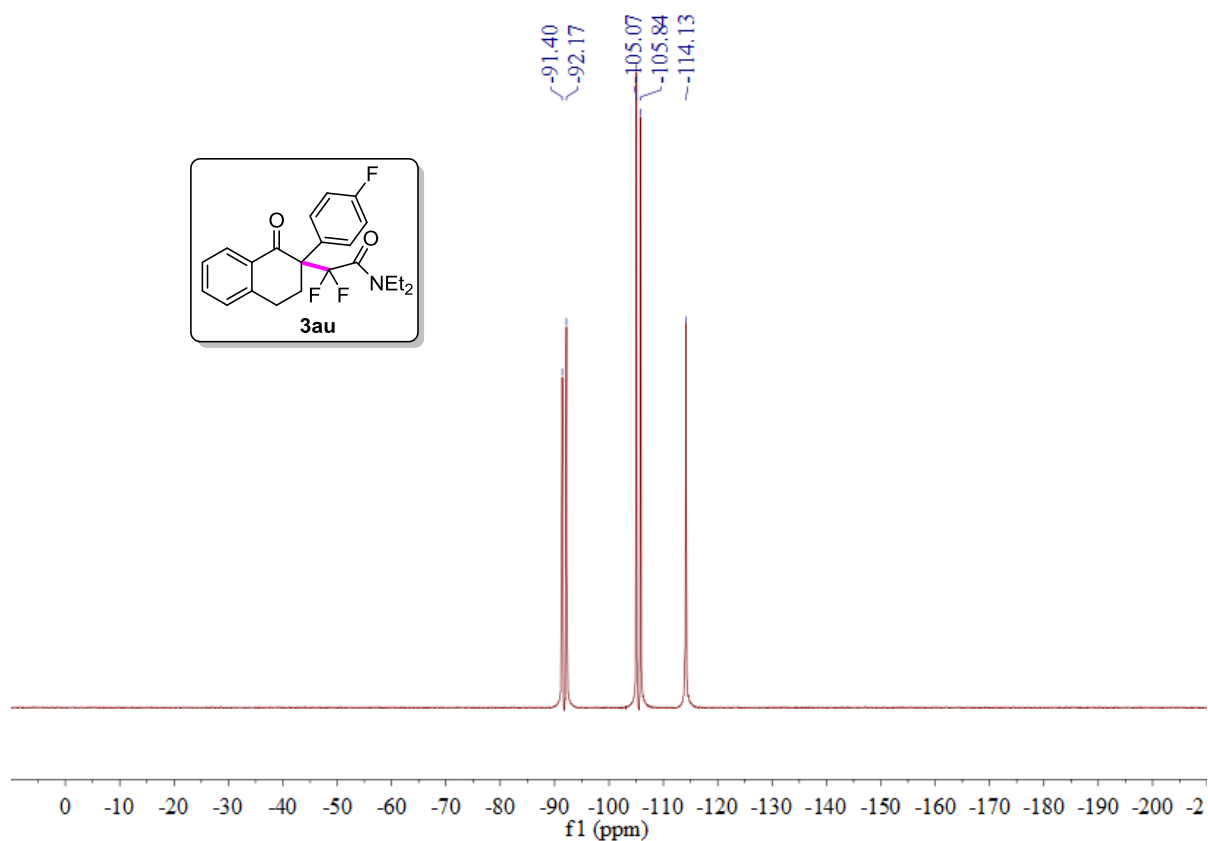

Supplementary Figure 141.  $^{19}\text{F}$  NMR of **3au**

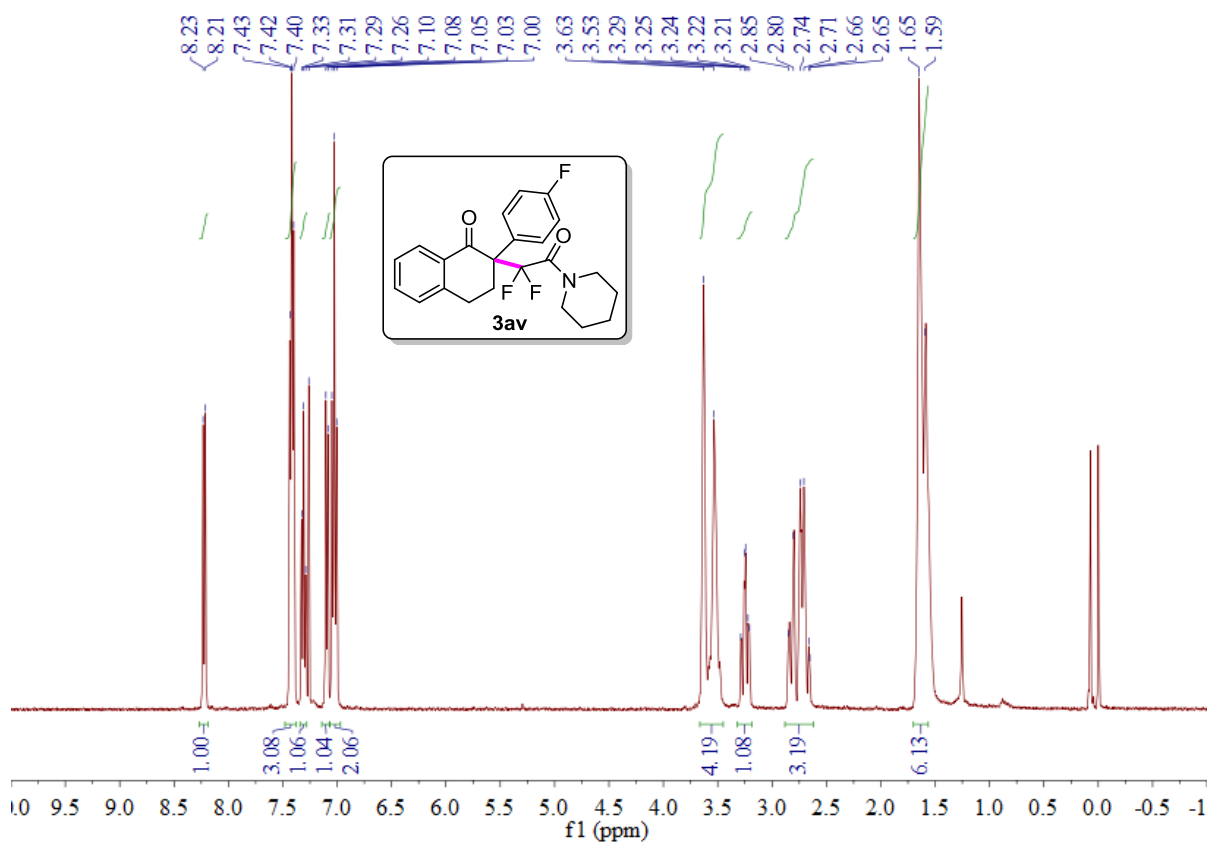

Supplementary Figure 142.  $^1\text{H}$  NMR of **3av**



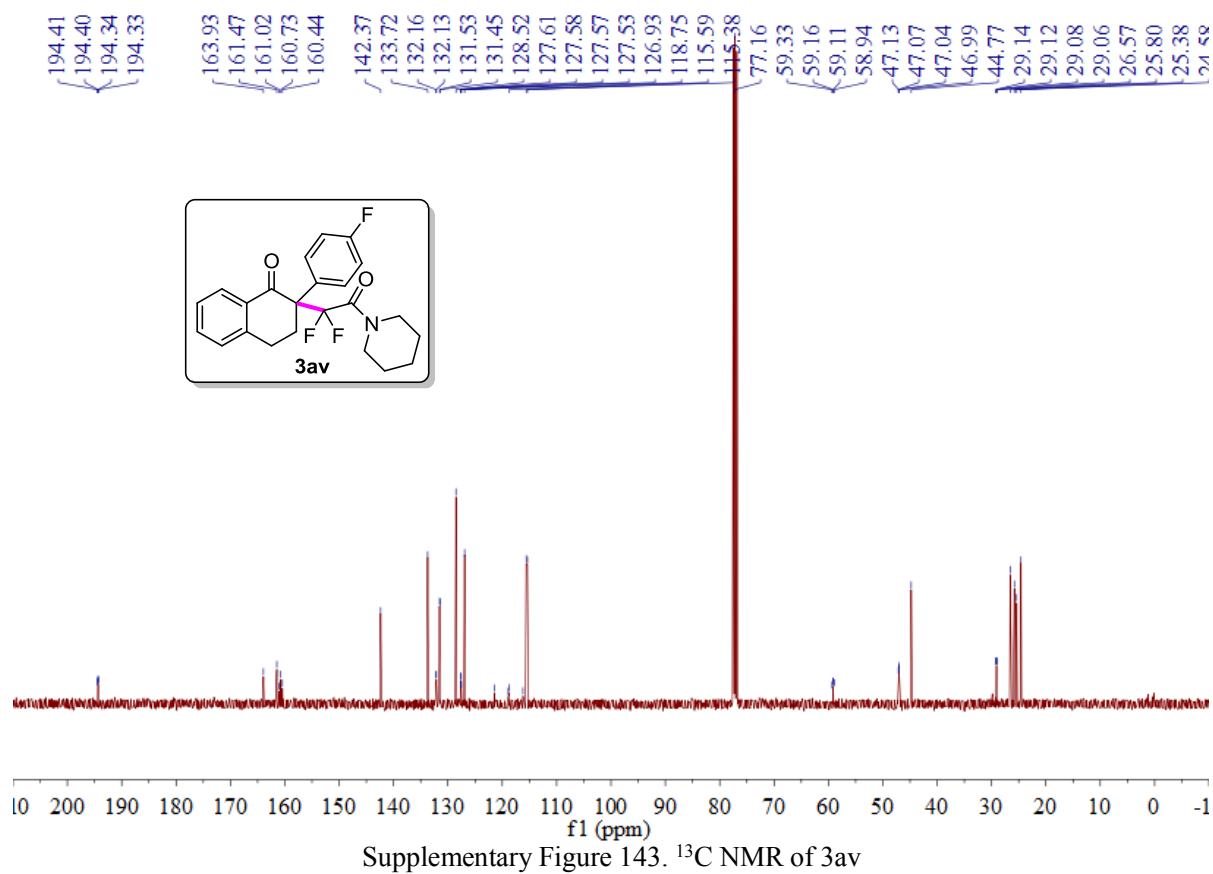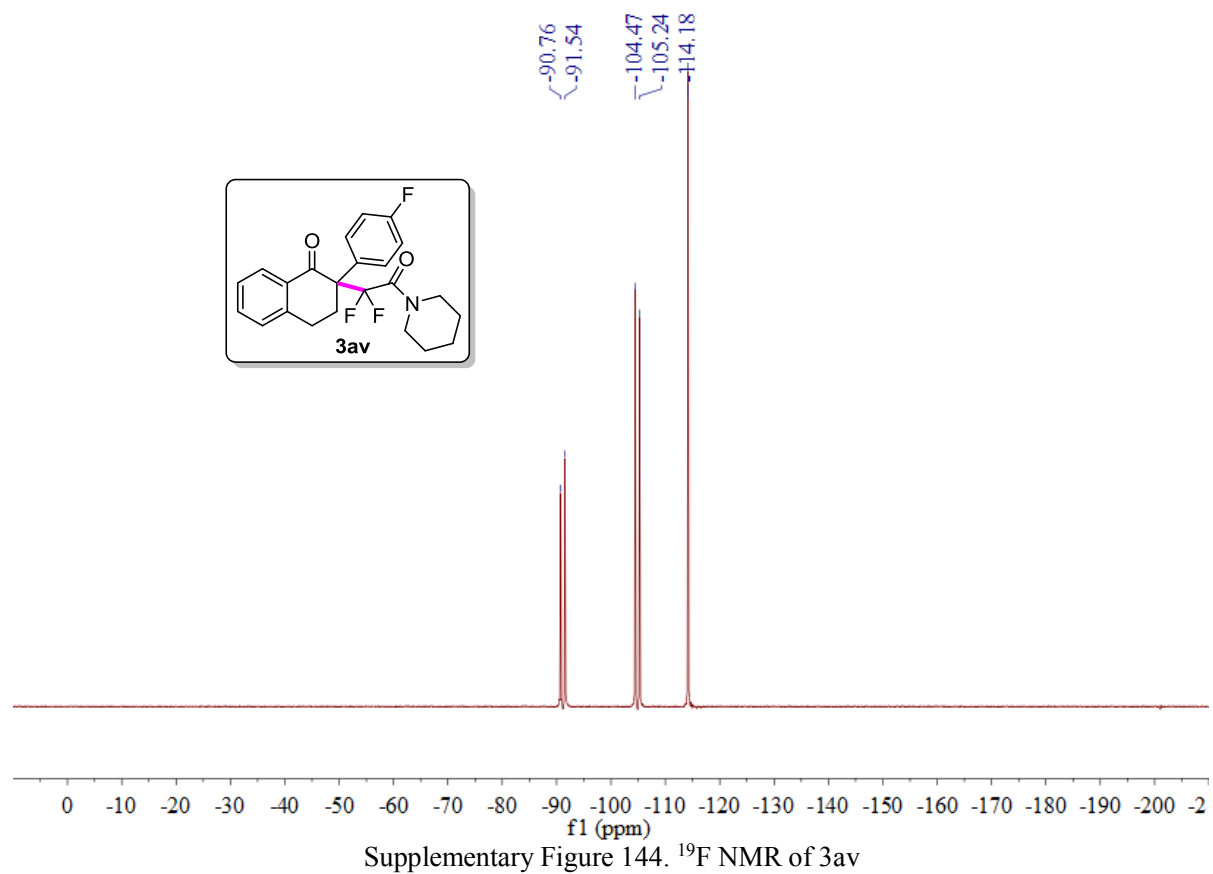

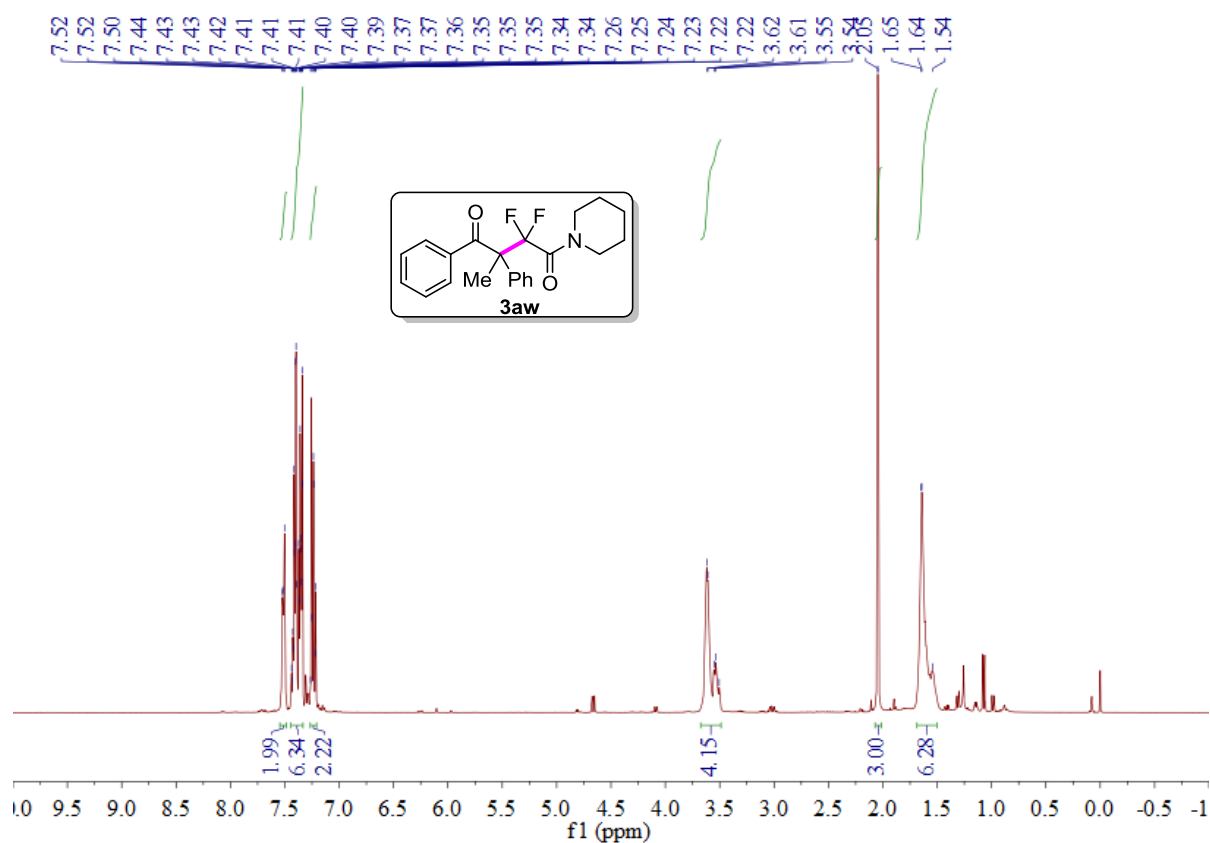

Supplementary Figure 145. <sup>1</sup>H NMR of **3aw**

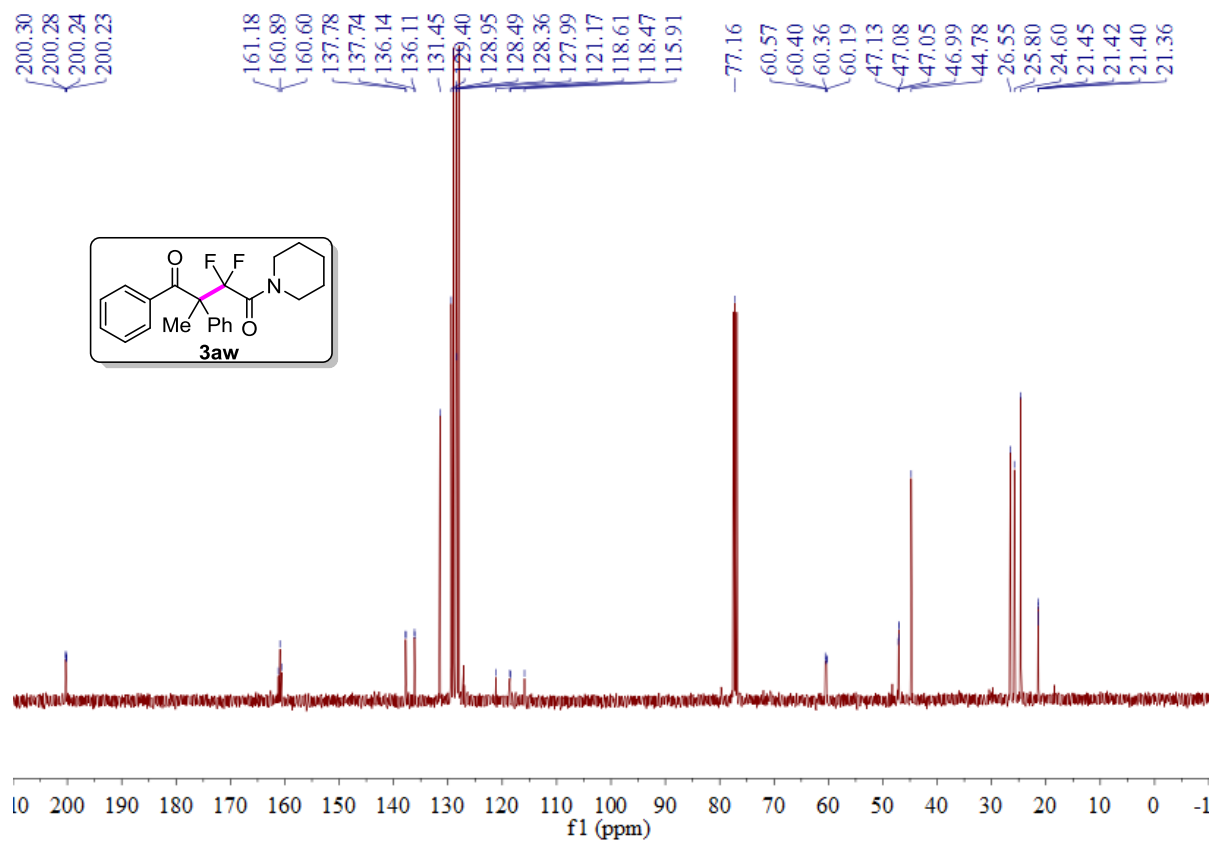

Supplementary Figure 146. <sup>13</sup>C NMR of **3aw**

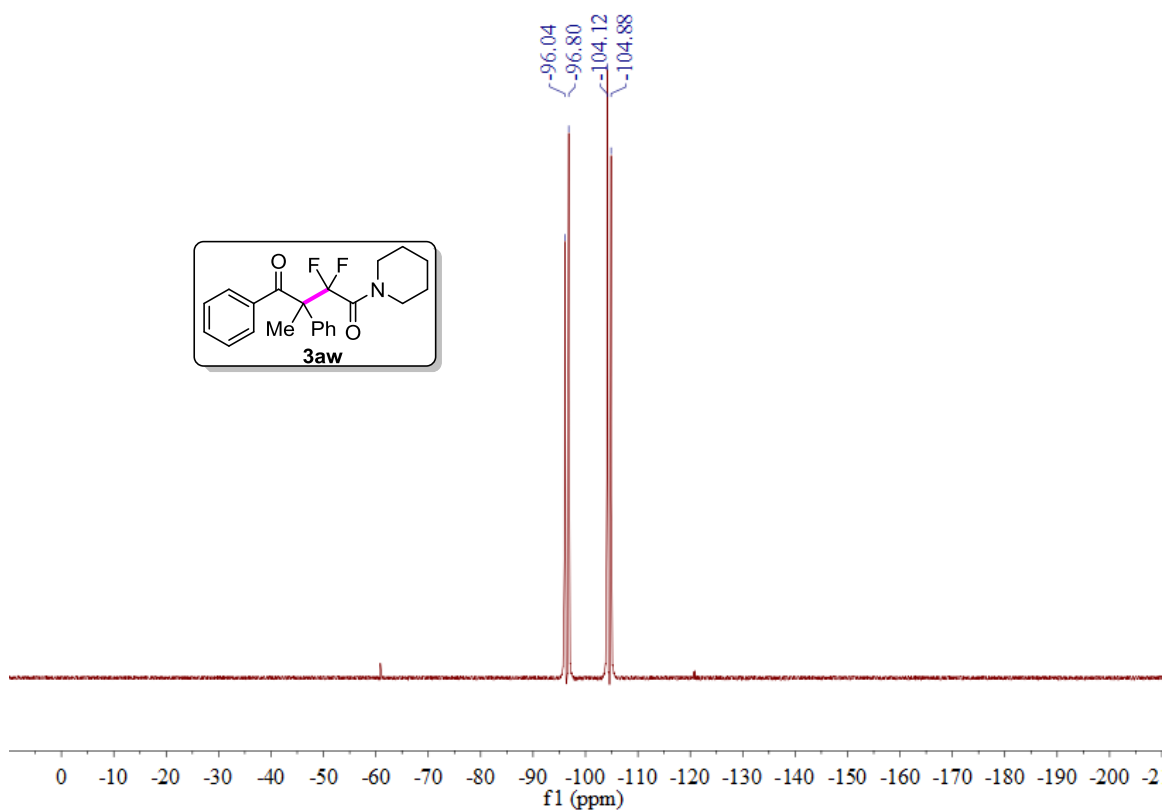

Supplementary Figure 147.  $^{19}\text{F}$  NMR of **3aw**

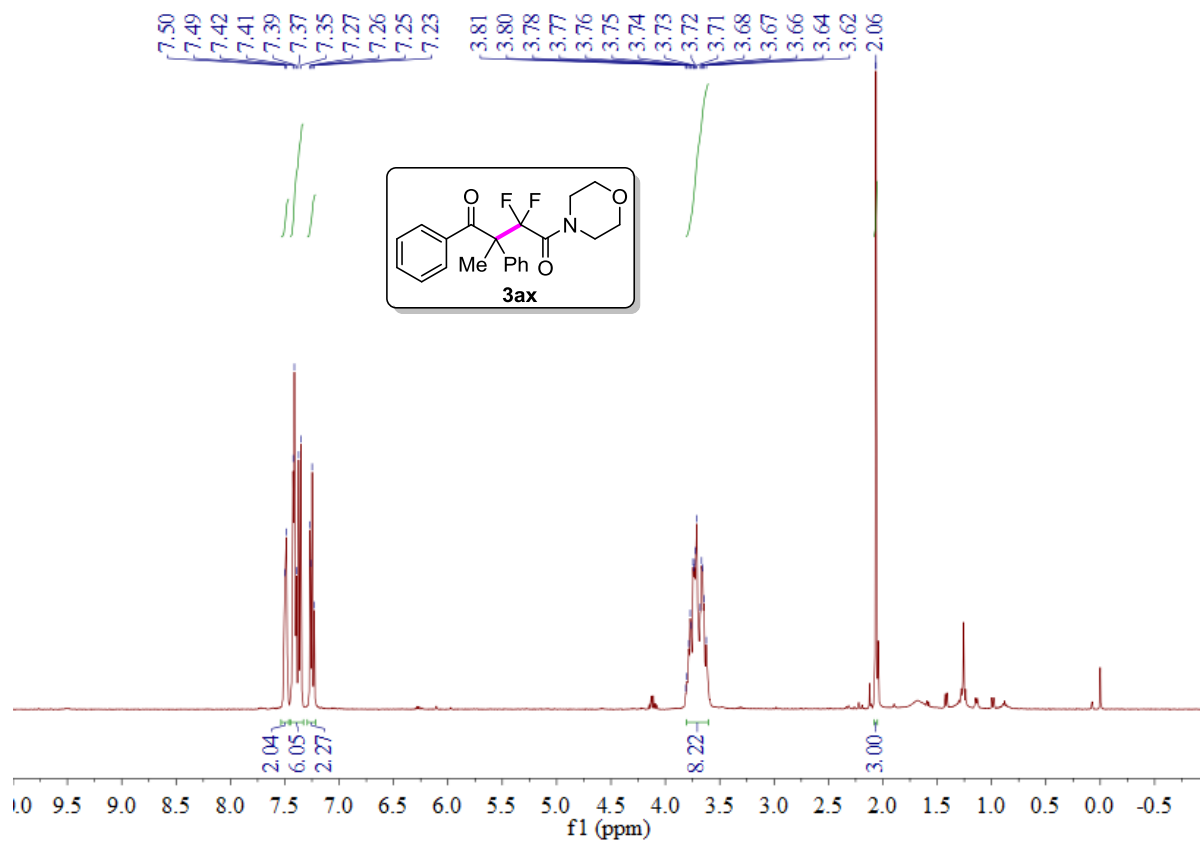

Supplementary Figure 148.  $^1\text{H}$  NMR of **3ax**

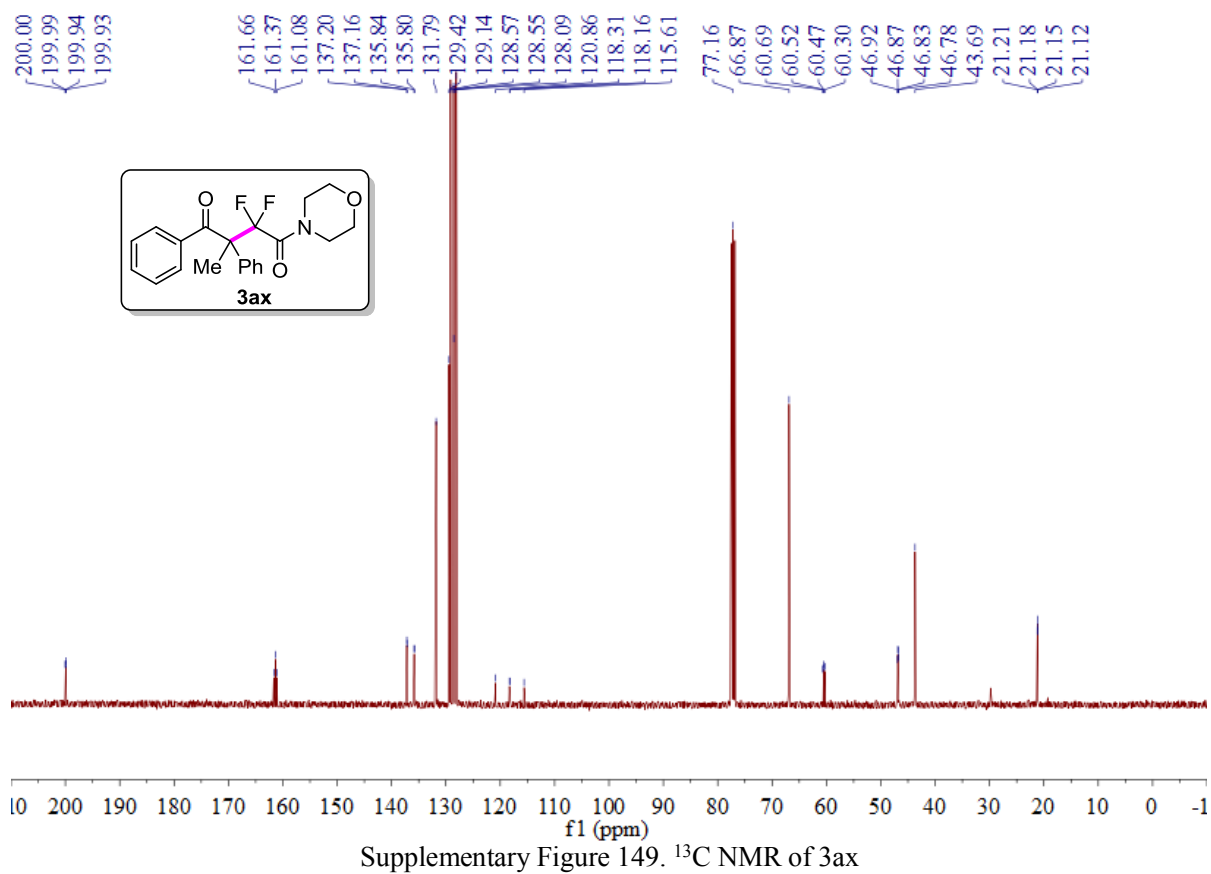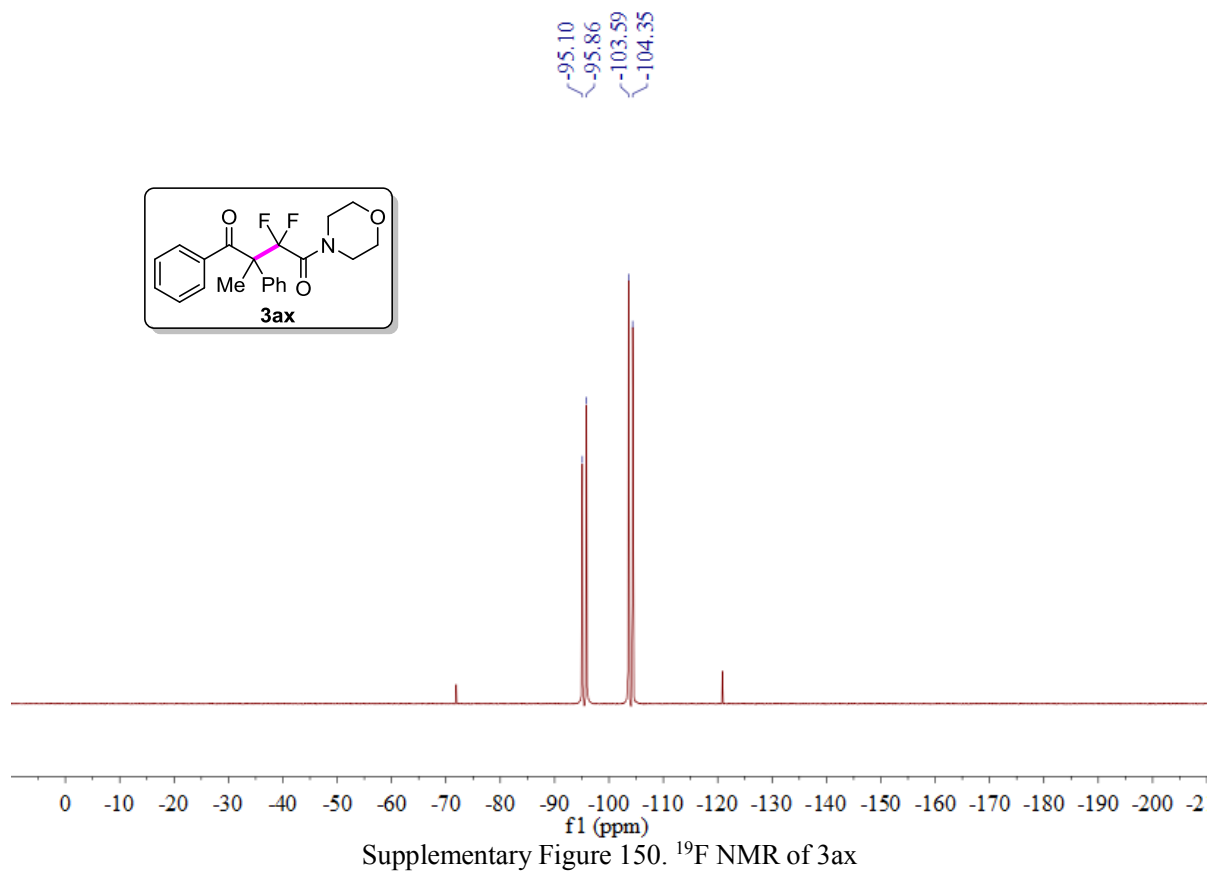

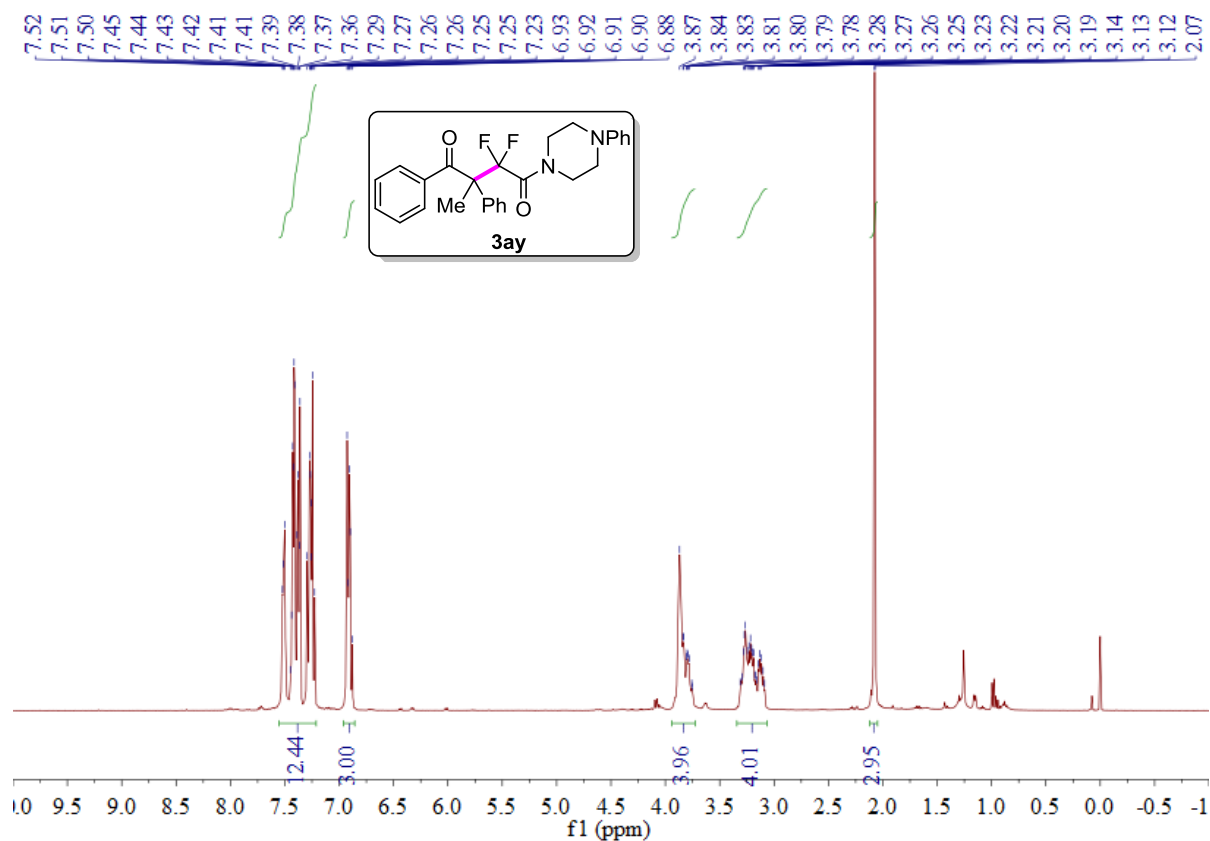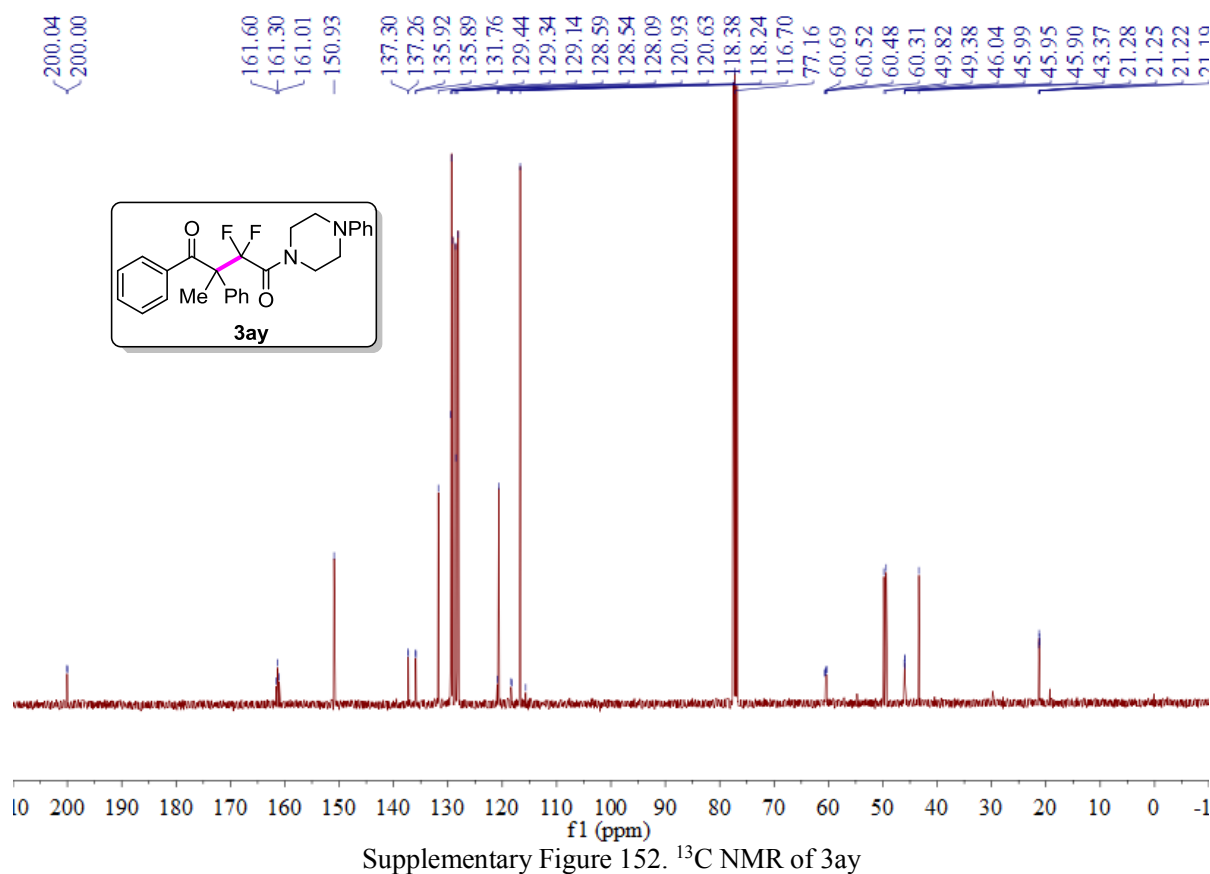

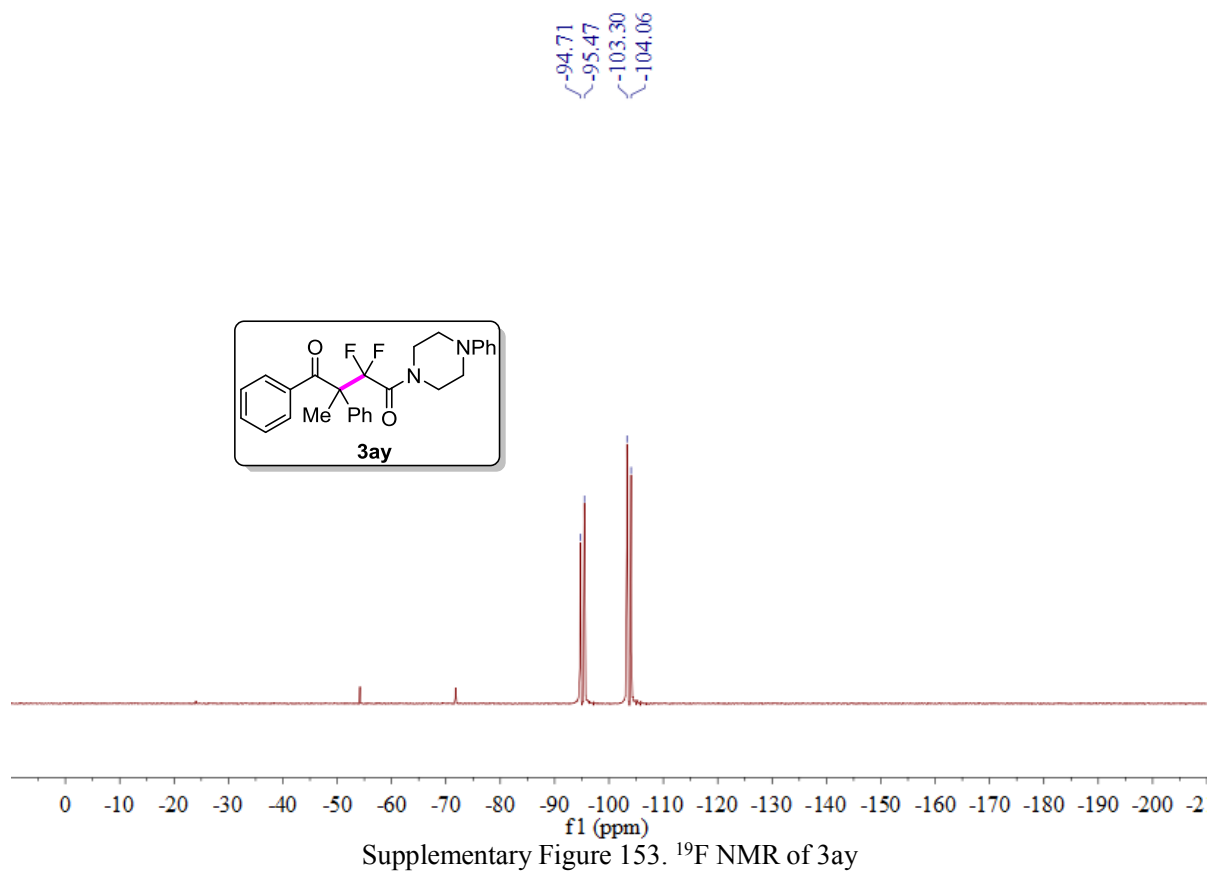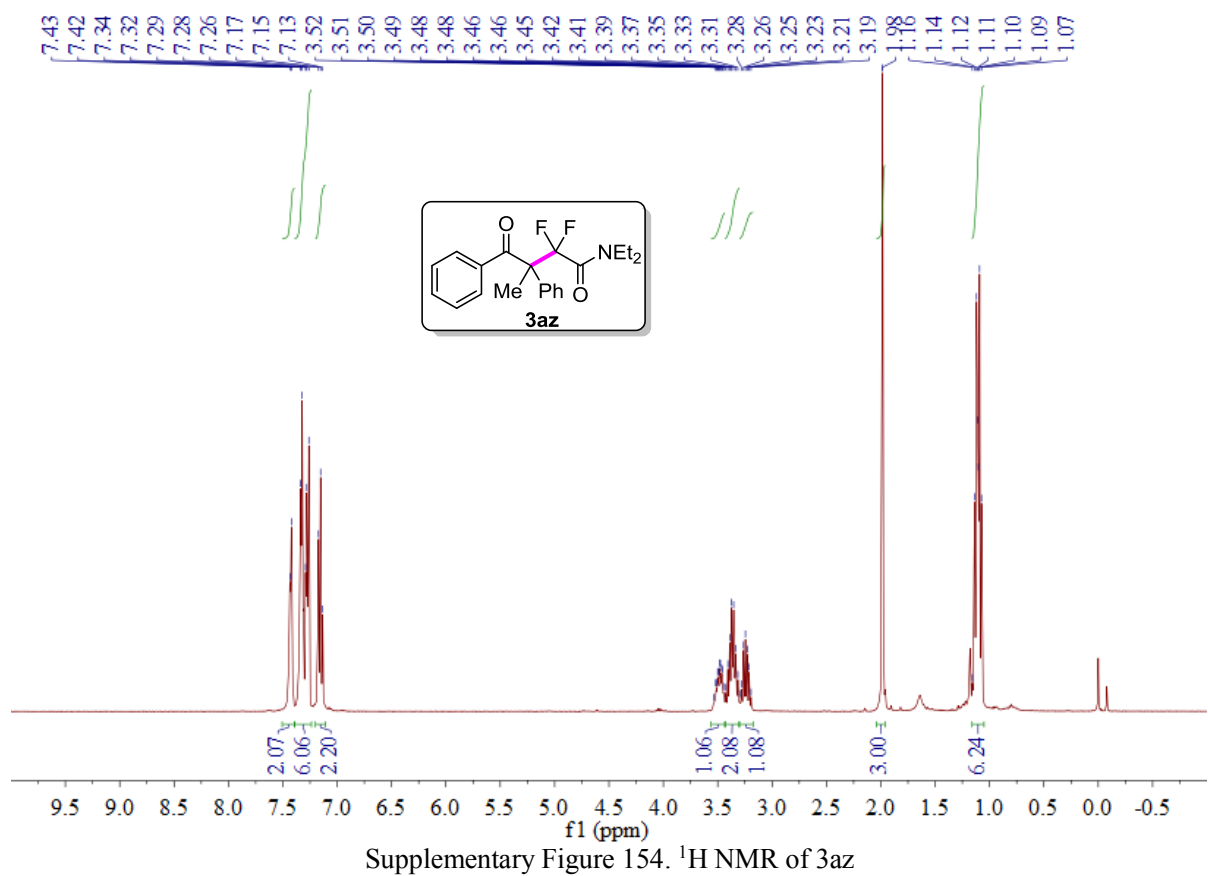

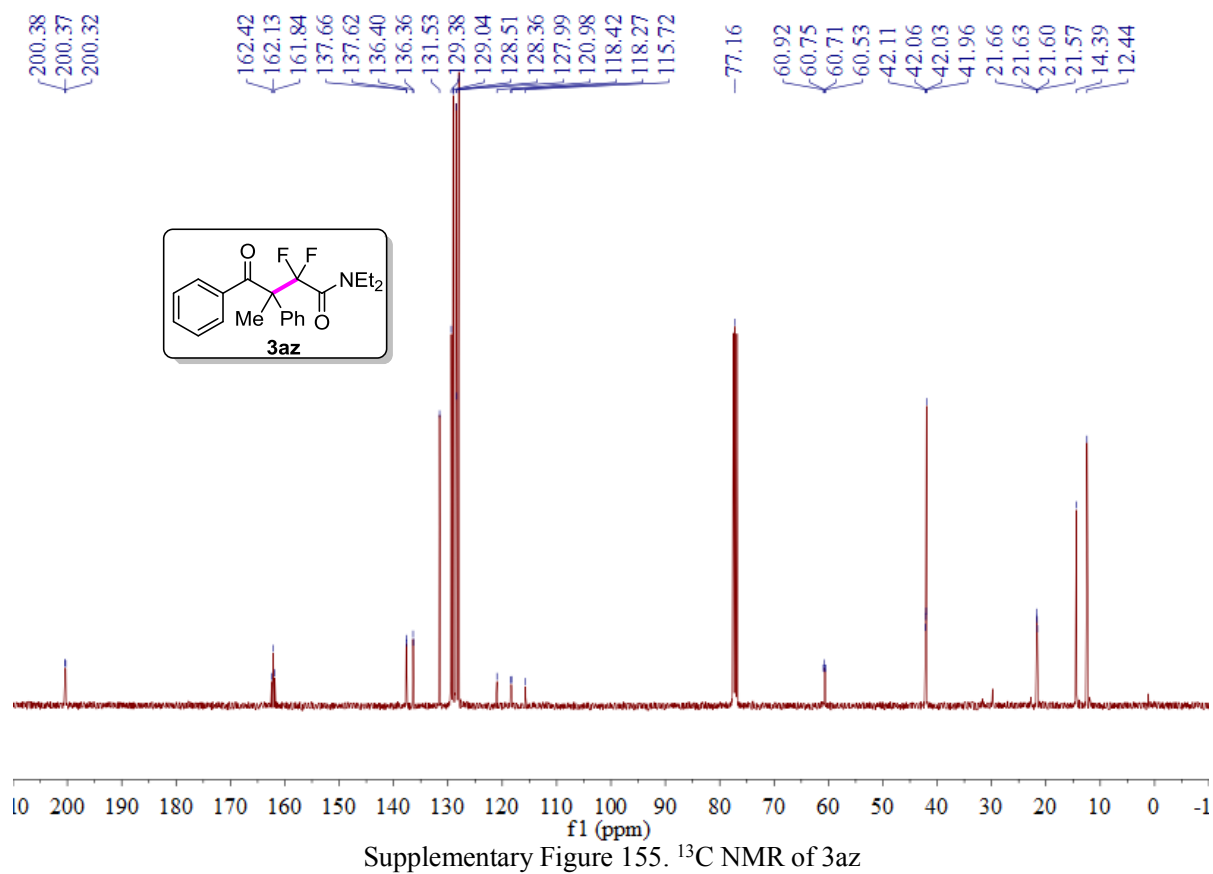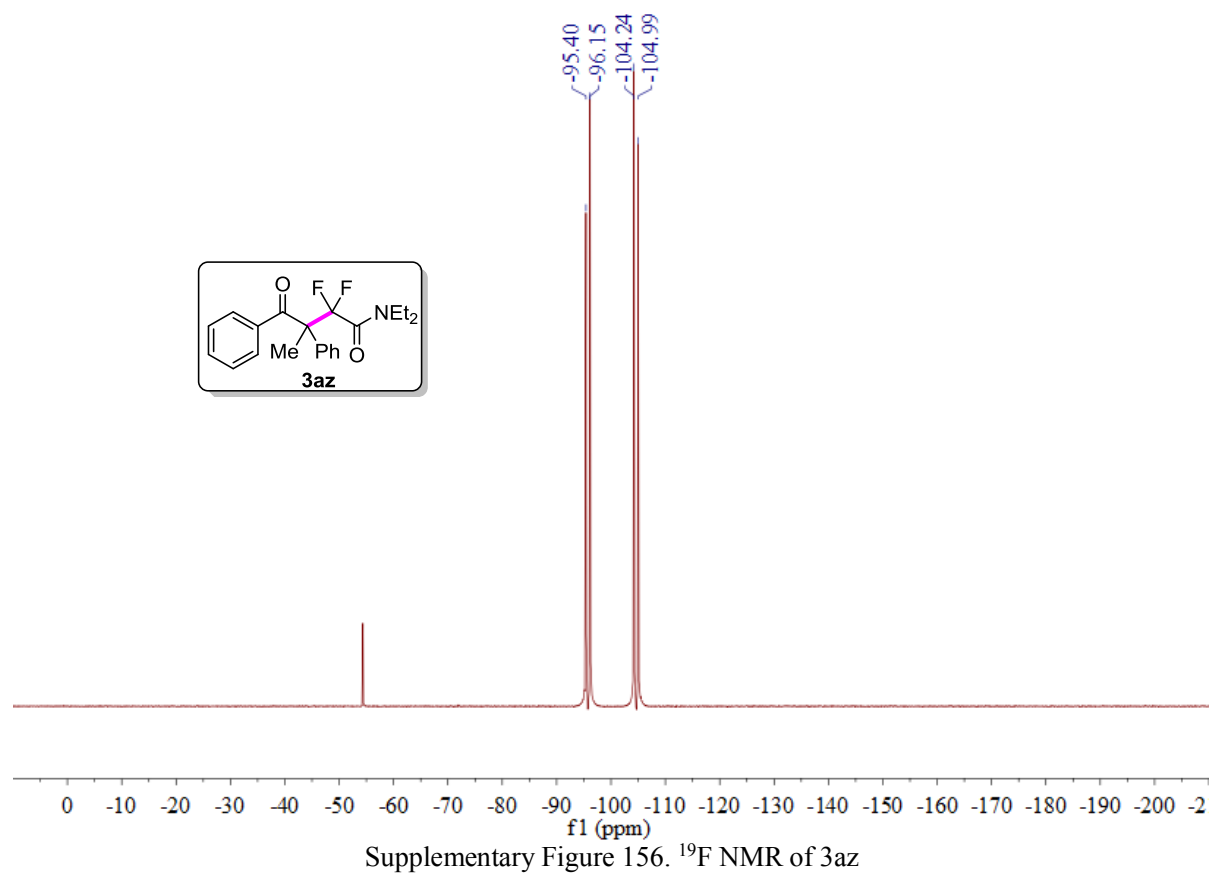

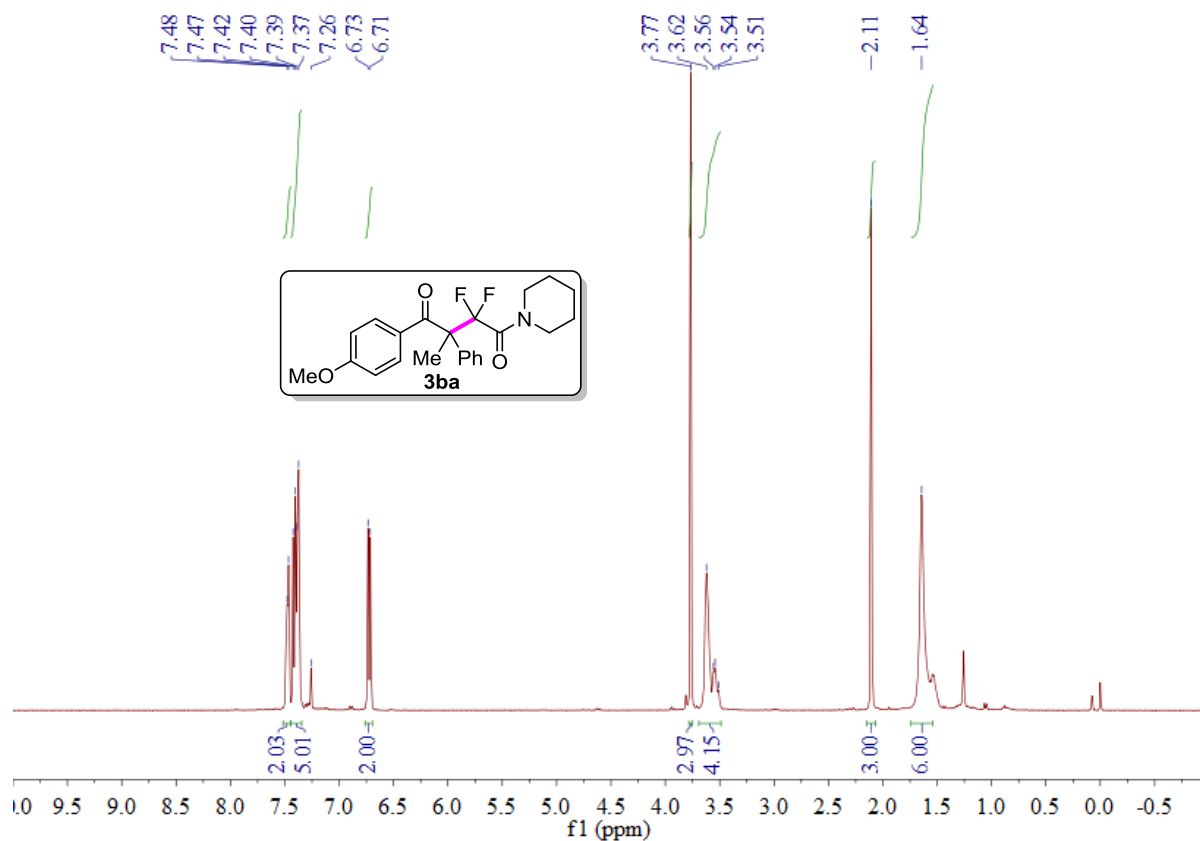

Supplementary Figure 157. <sup>1</sup>H NMR of 3ba

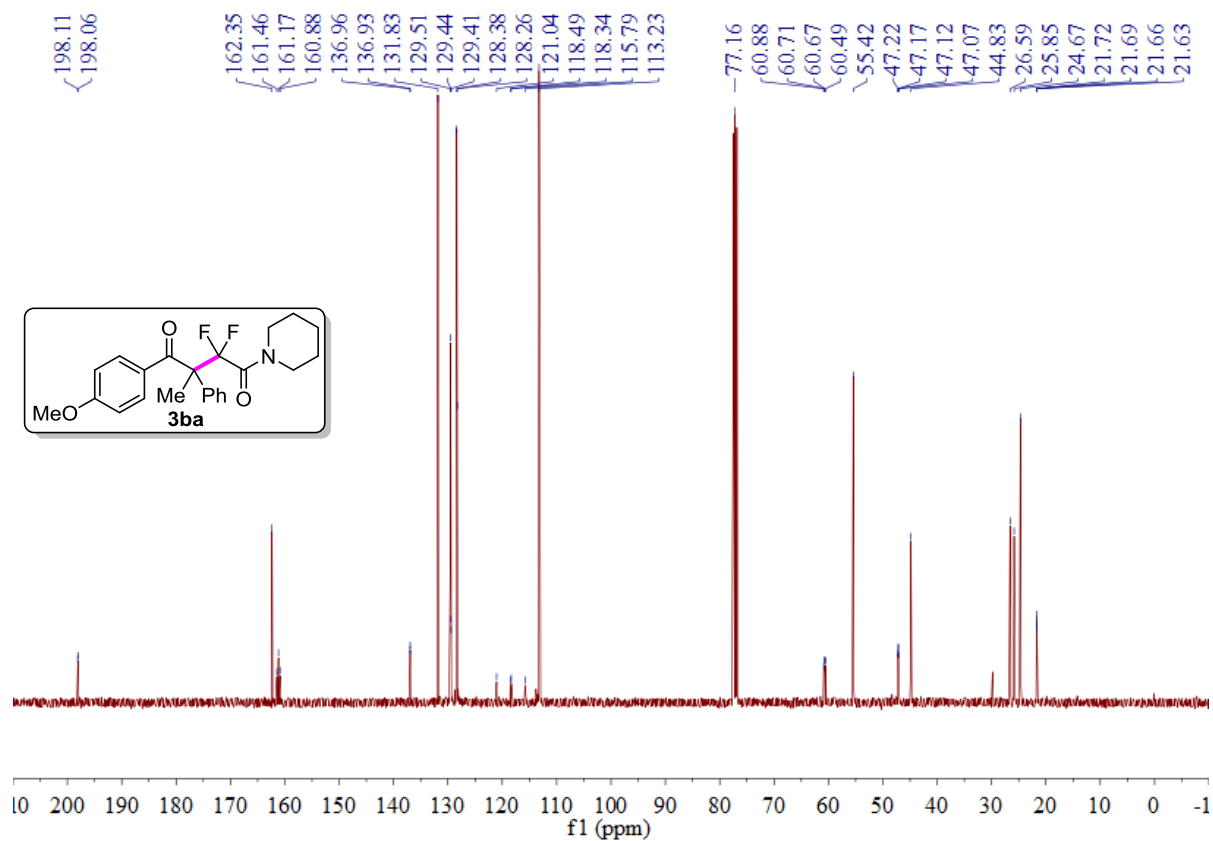

Supplementary Figure 158. <sup>13</sup>C NMR of 3ba



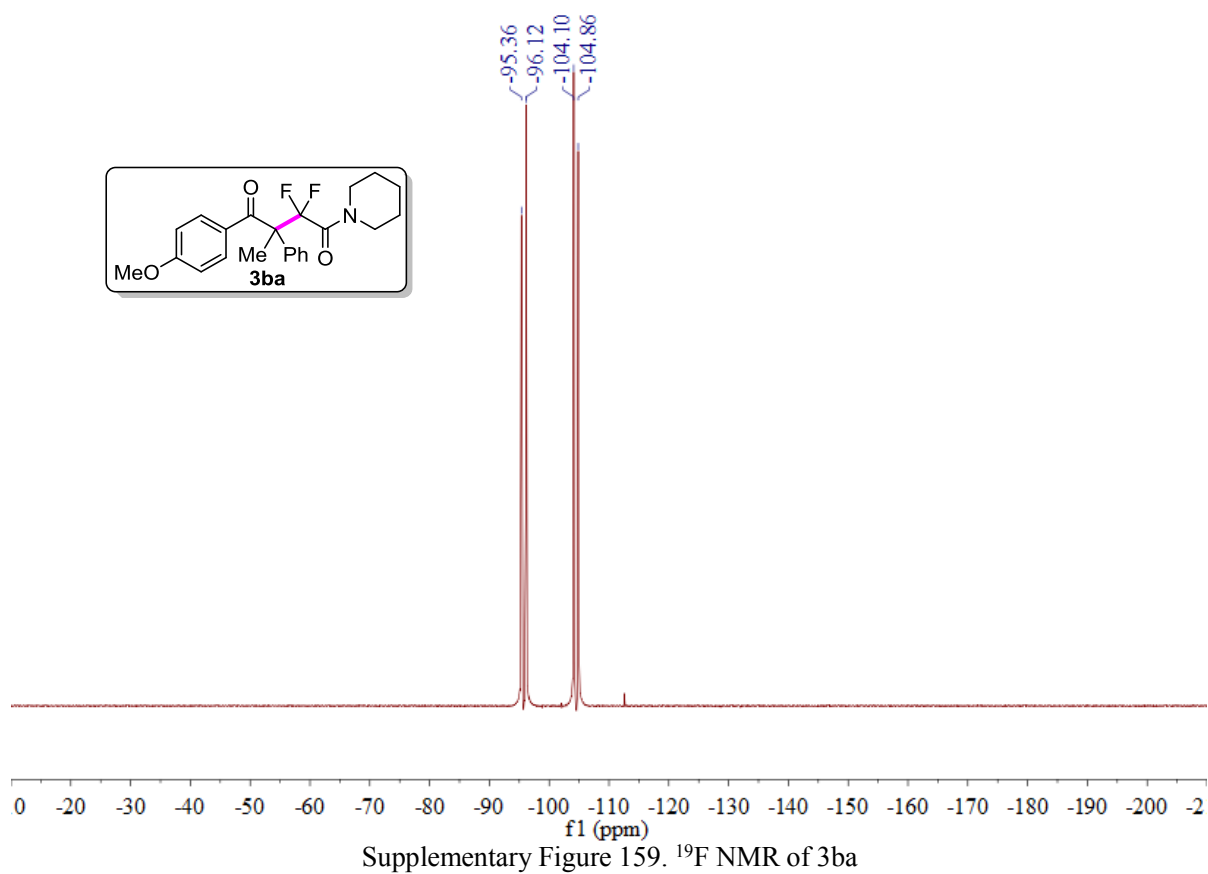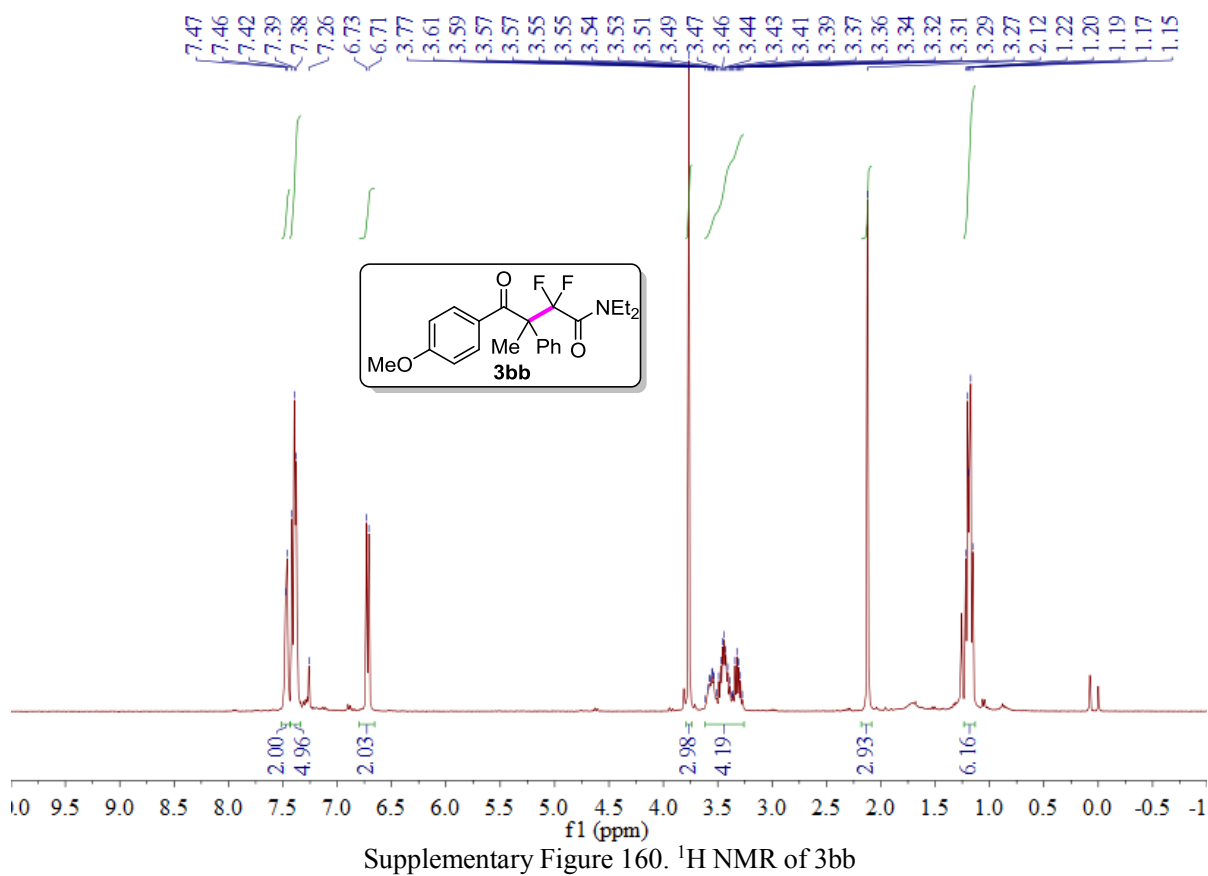

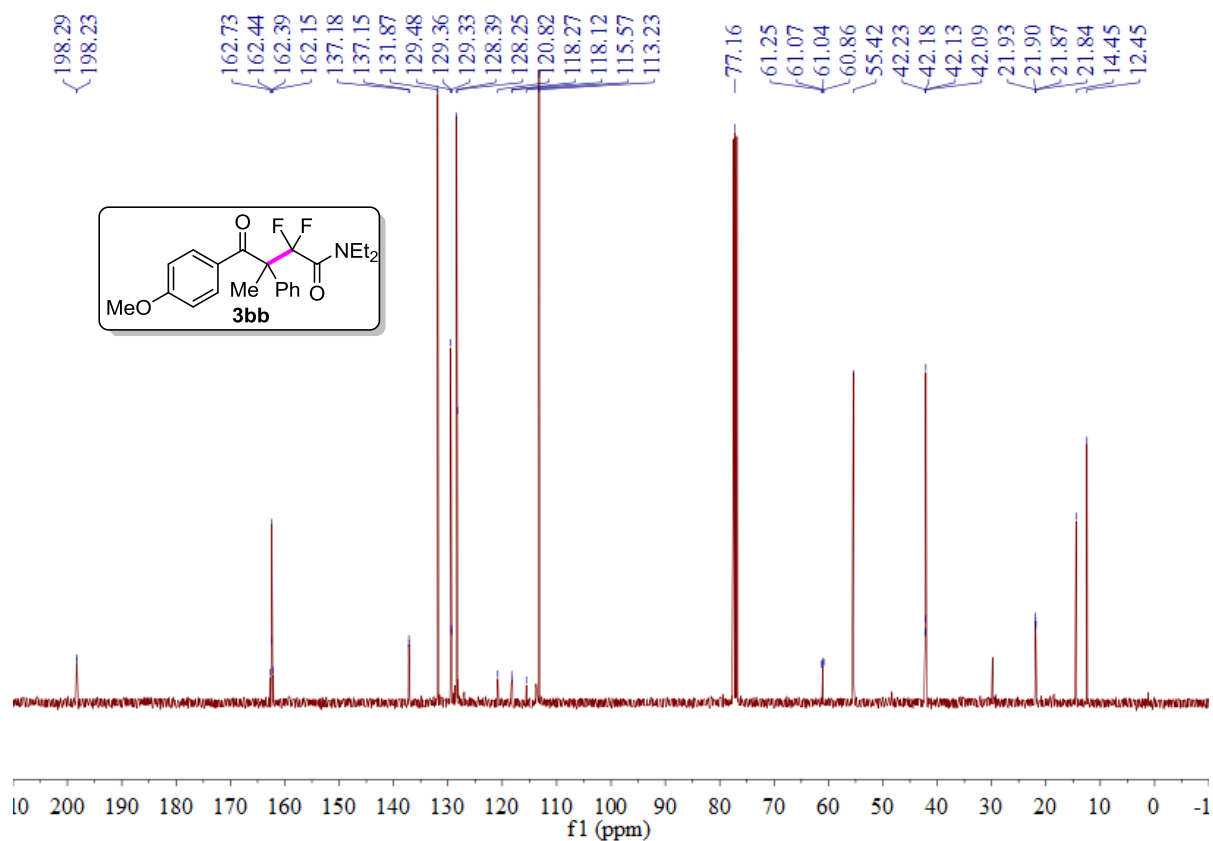

Supplementary Figure 161. <sup>13</sup>C NMR of 3bb

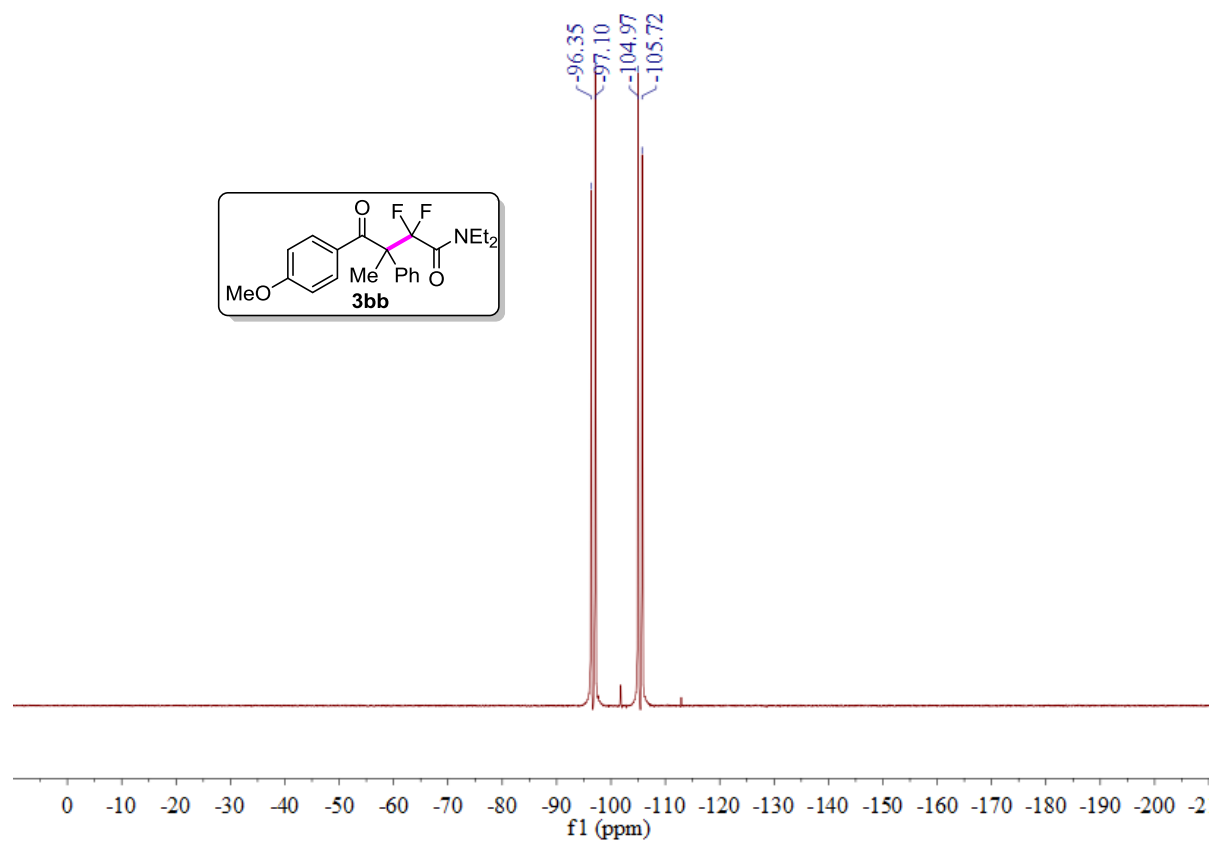

Supplementary Figure 162. <sup>19</sup>F NMR of 3bb

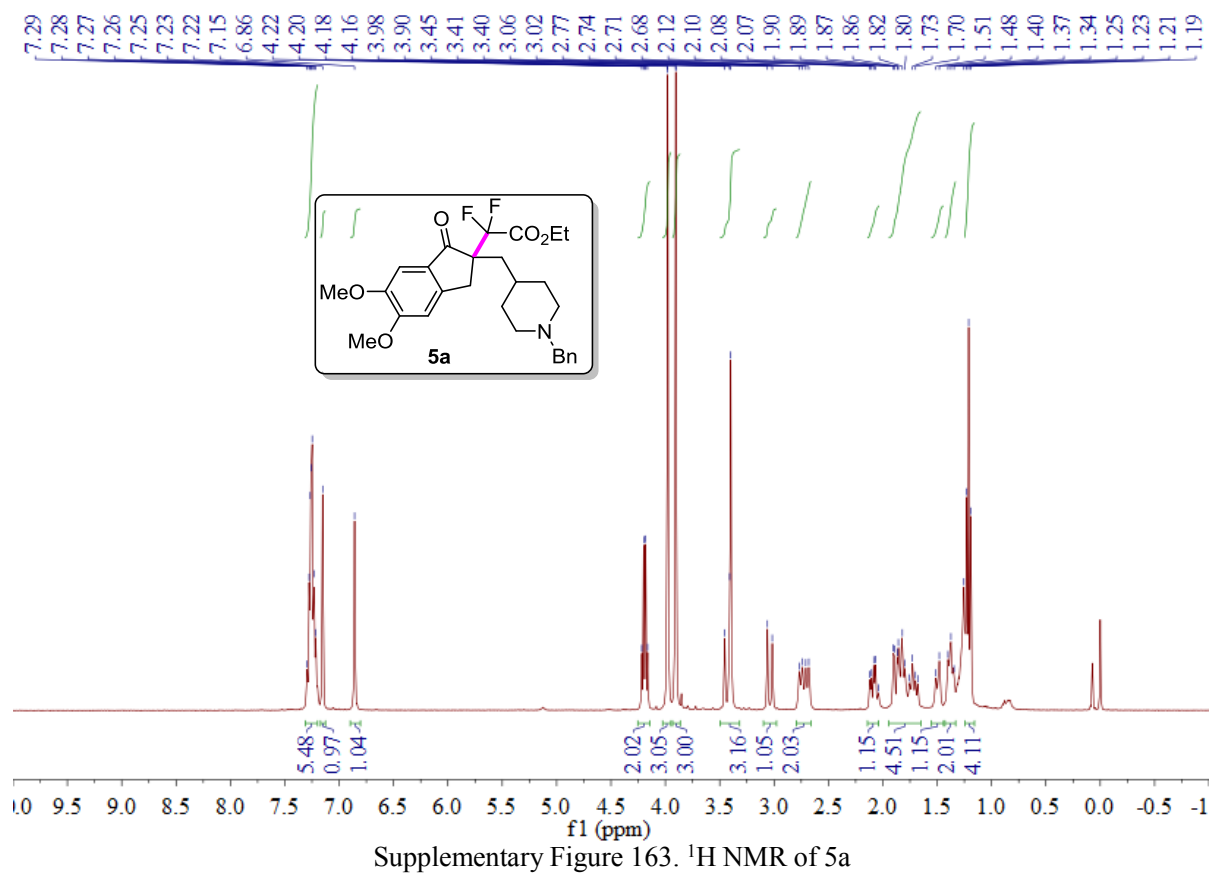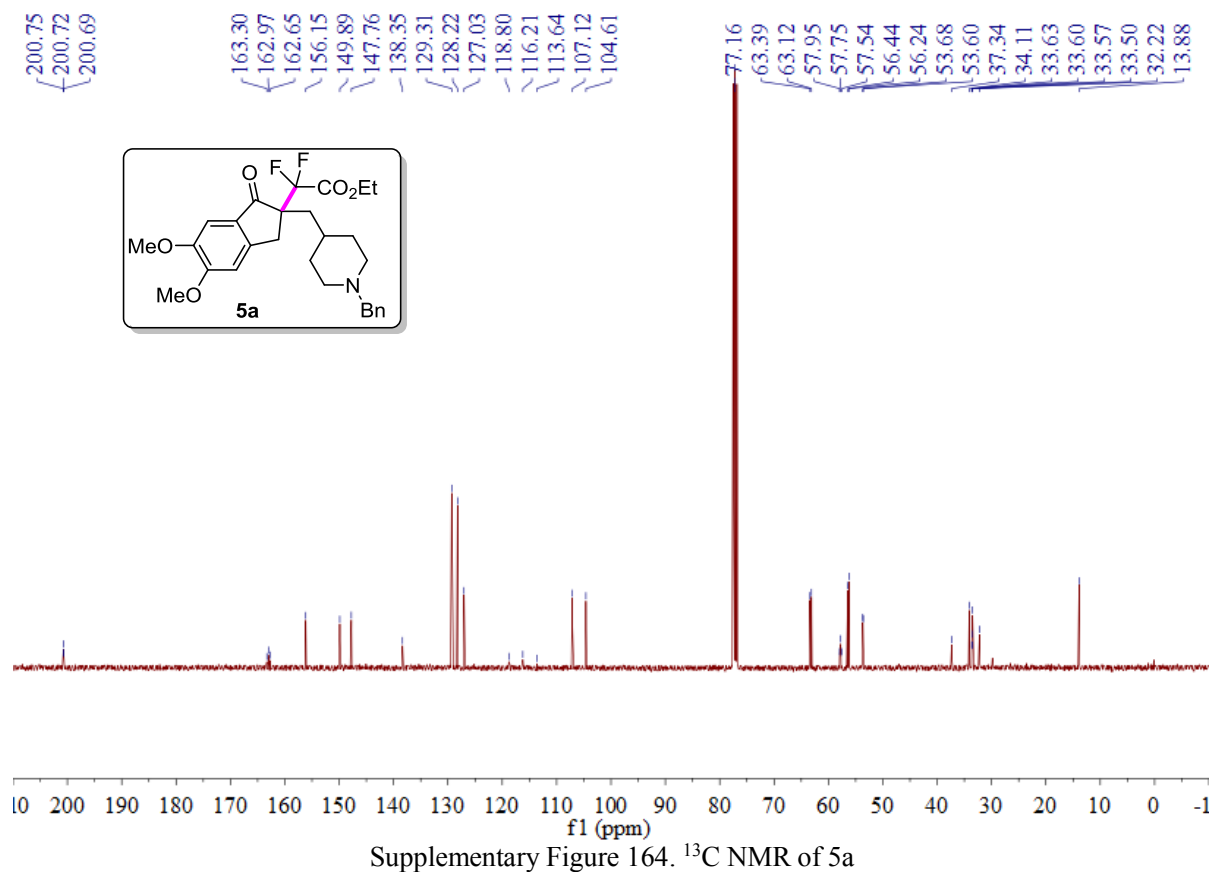

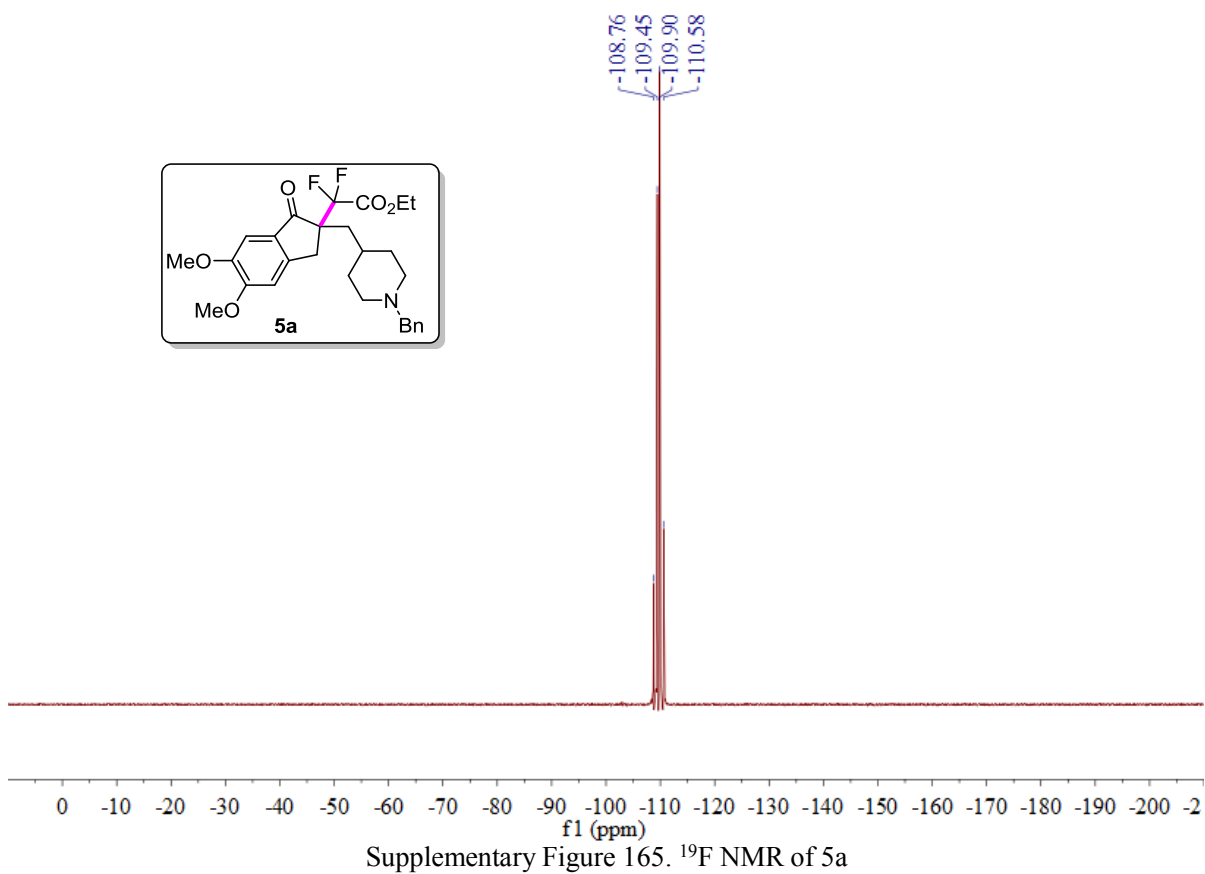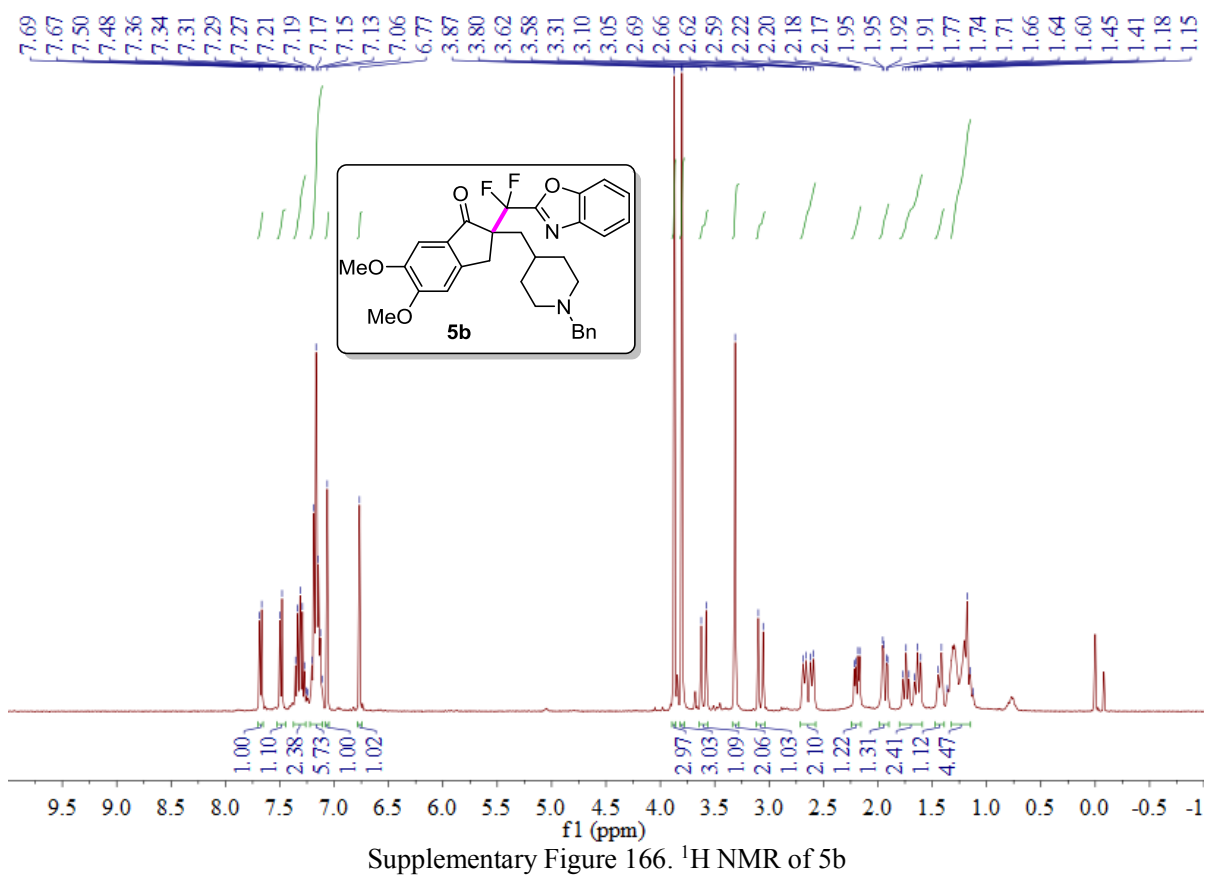

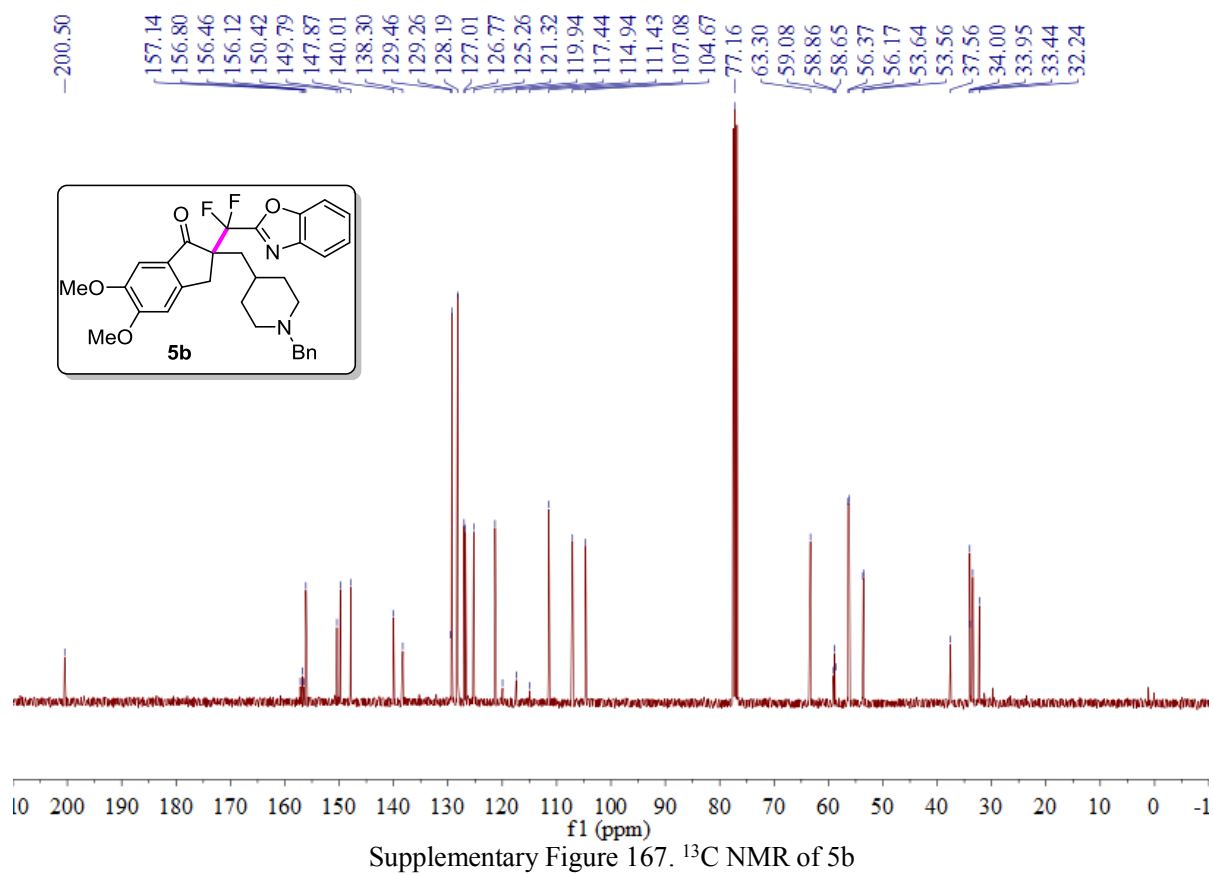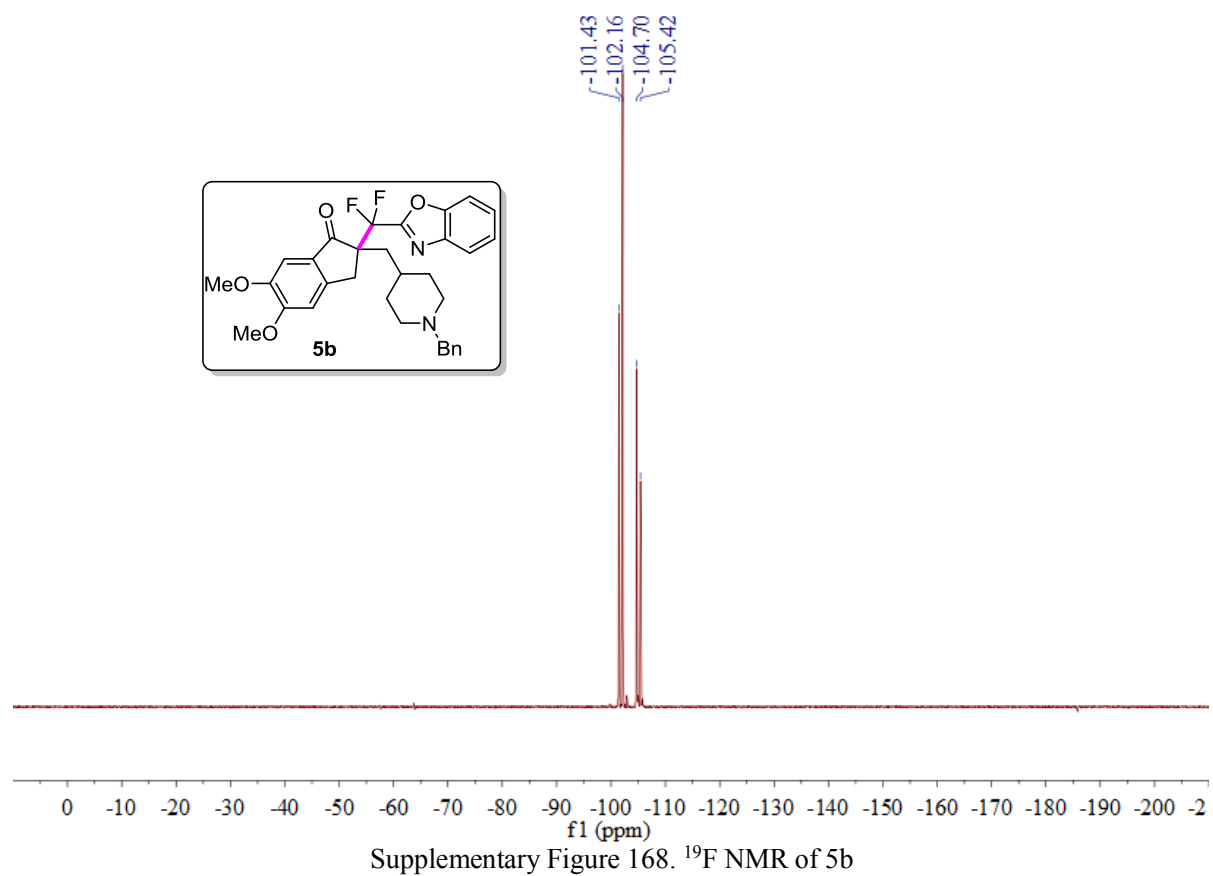

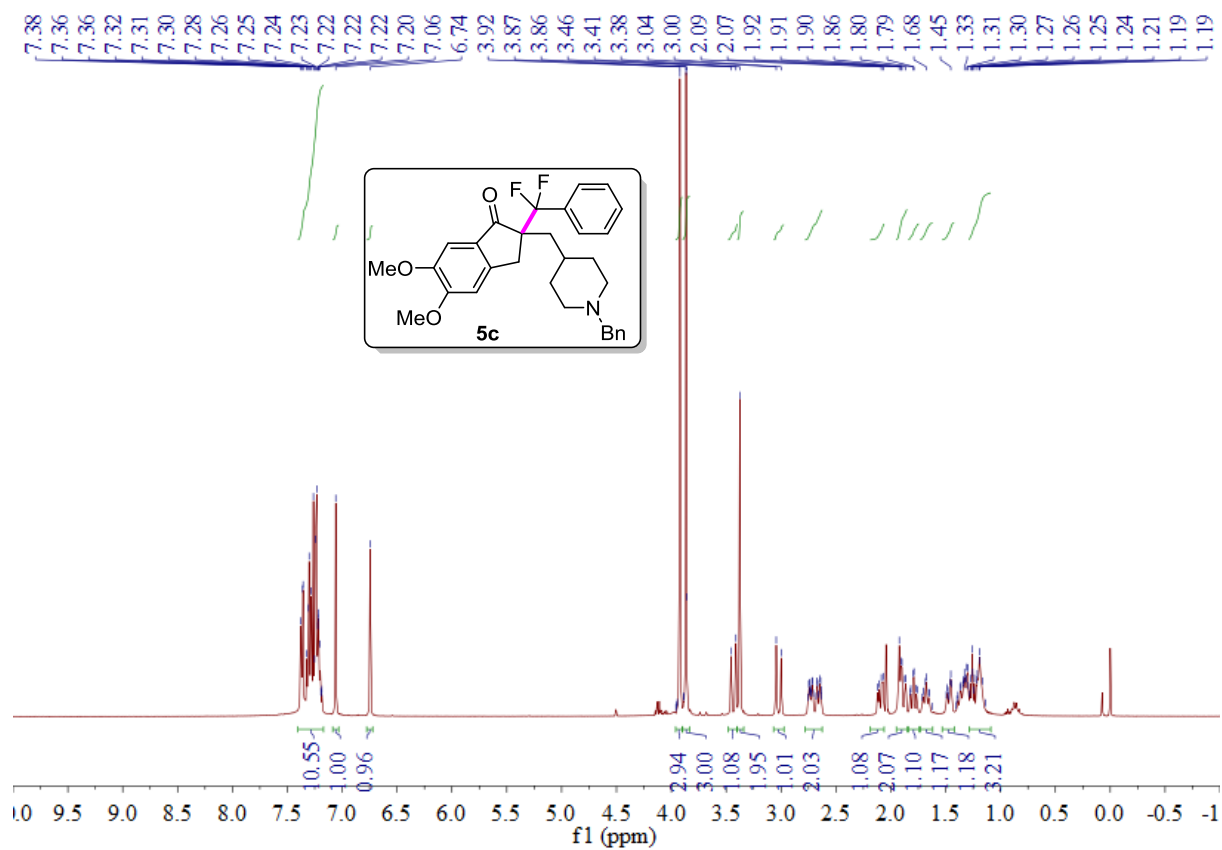

Supplementary Figure 169. <sup>1</sup>H NMR of 5c

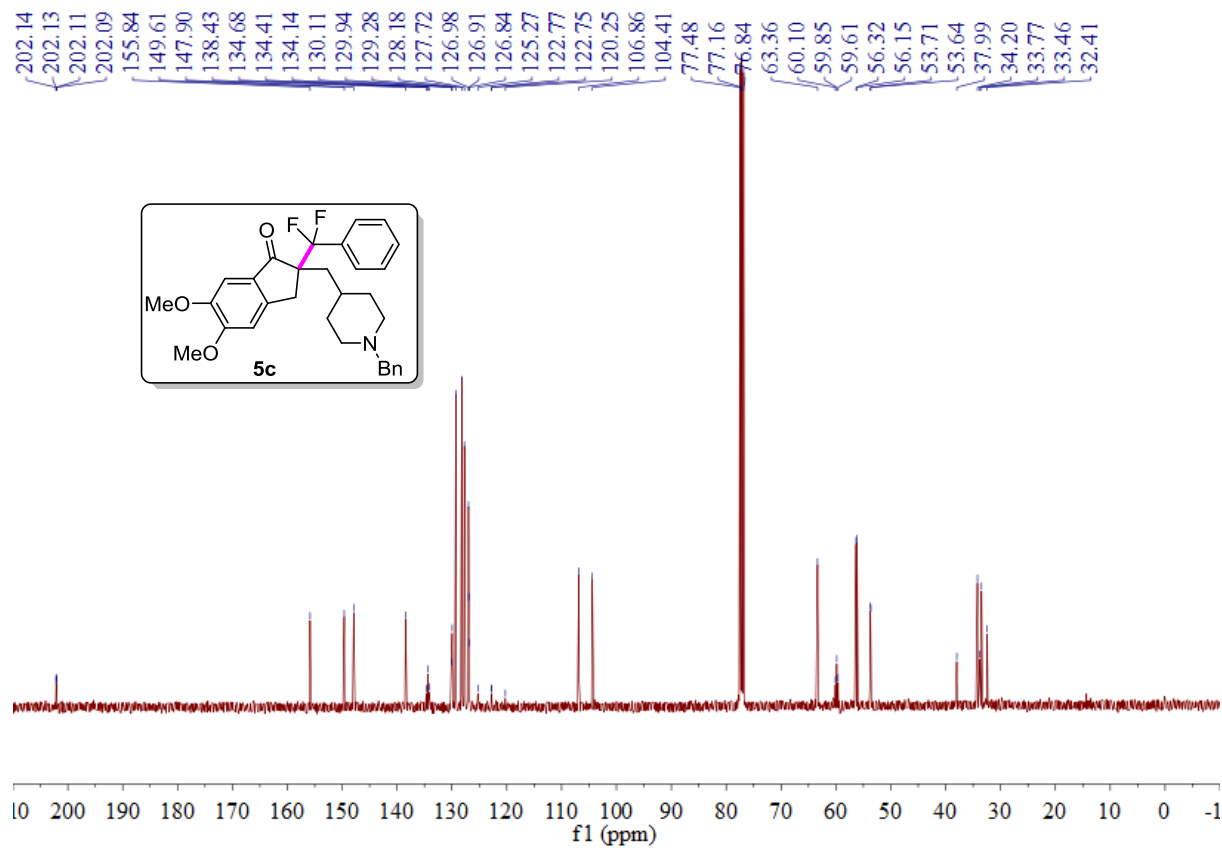

Supplementary Figure 170. <sup>13</sup>C NMR of 5c

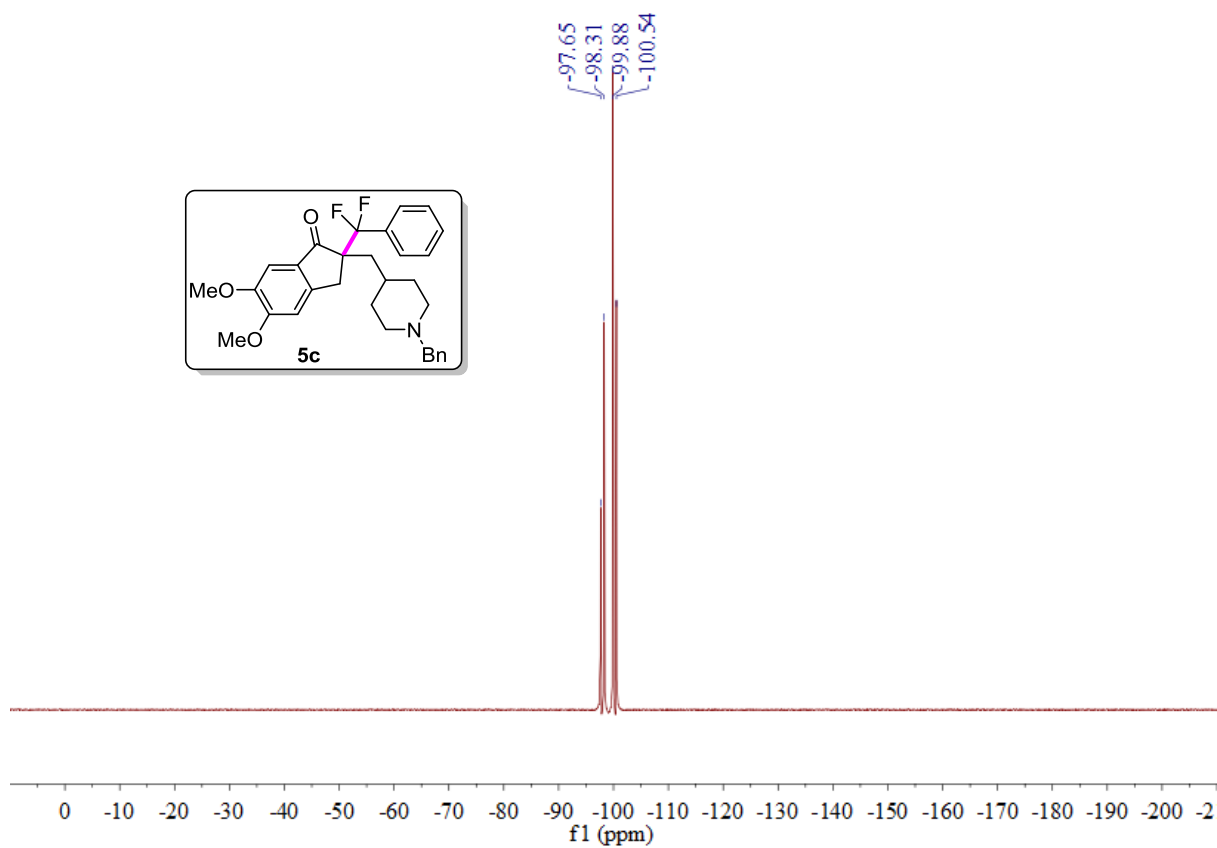

Supplementary Figure 171. <sup>19</sup>F NMR of 5c

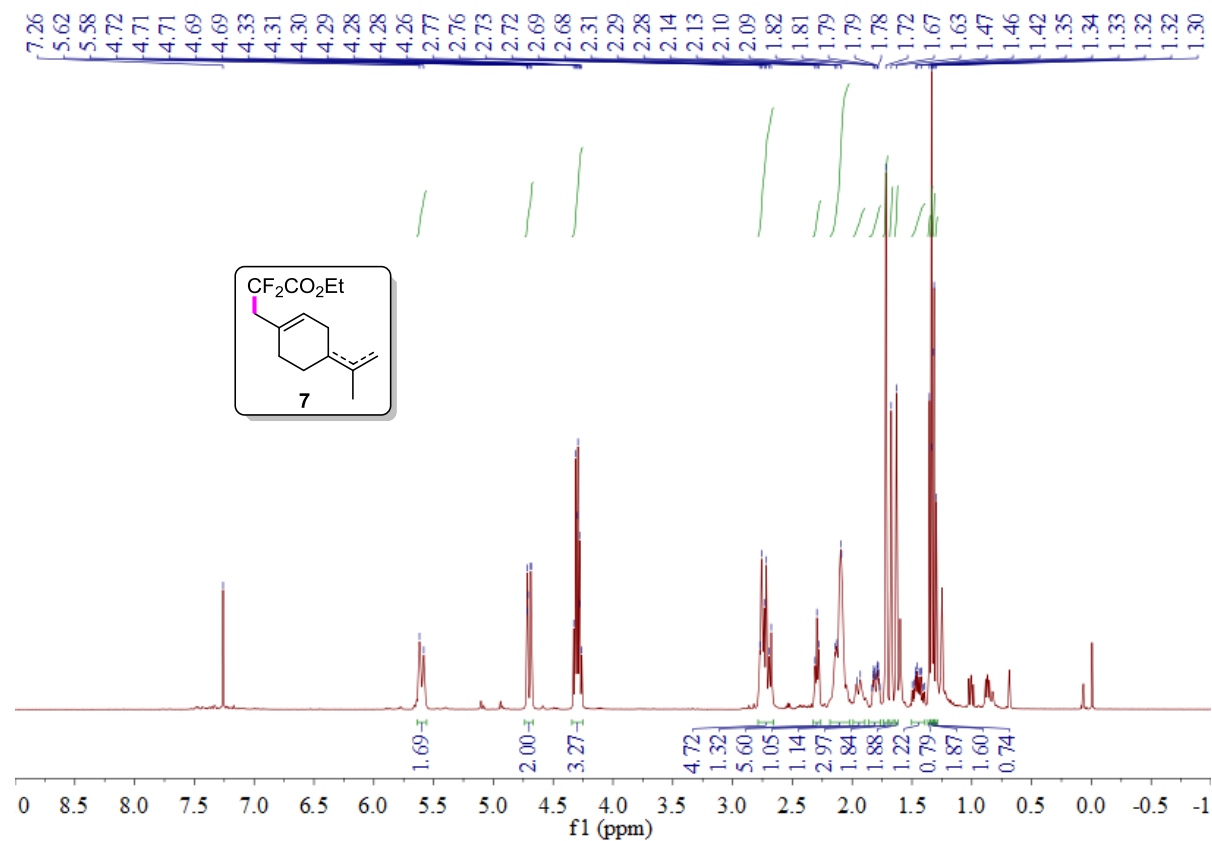

Supplementary Figure 172. <sup>1</sup>H NMR of 7





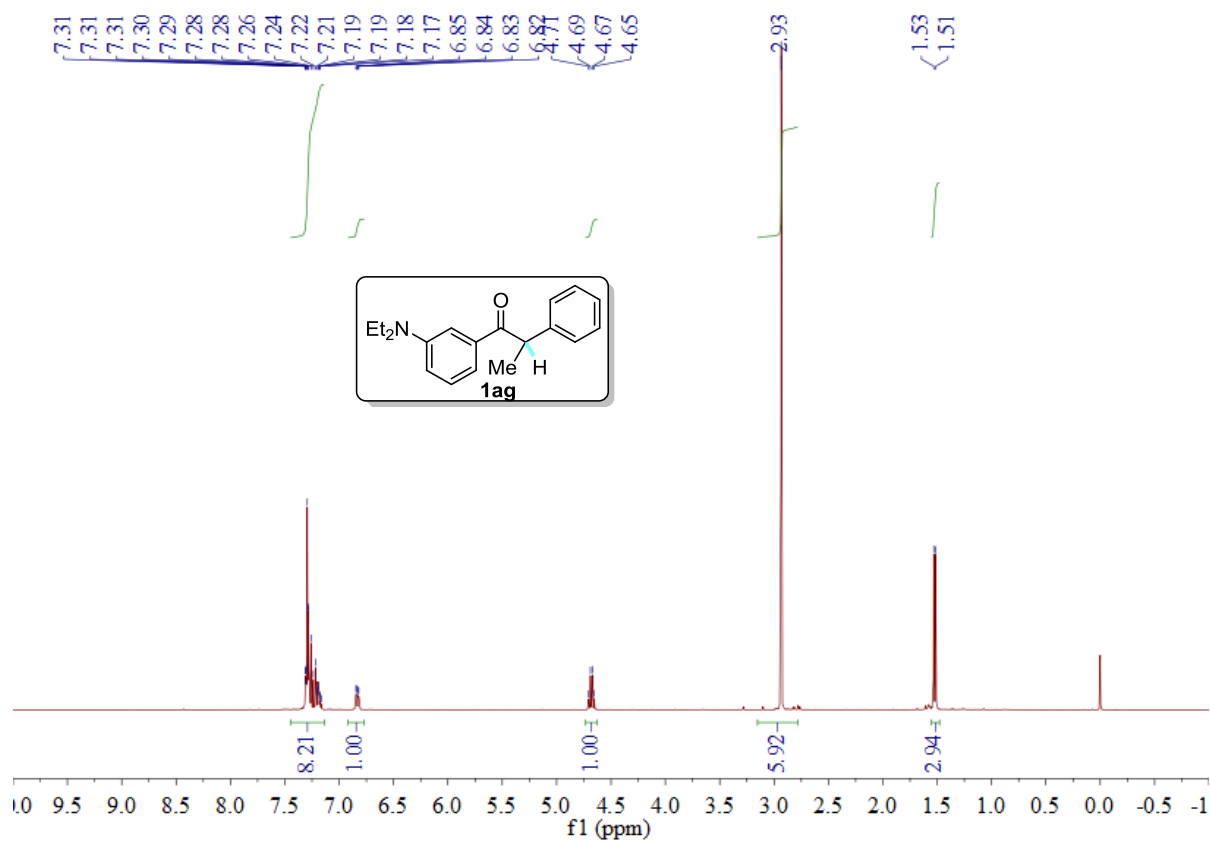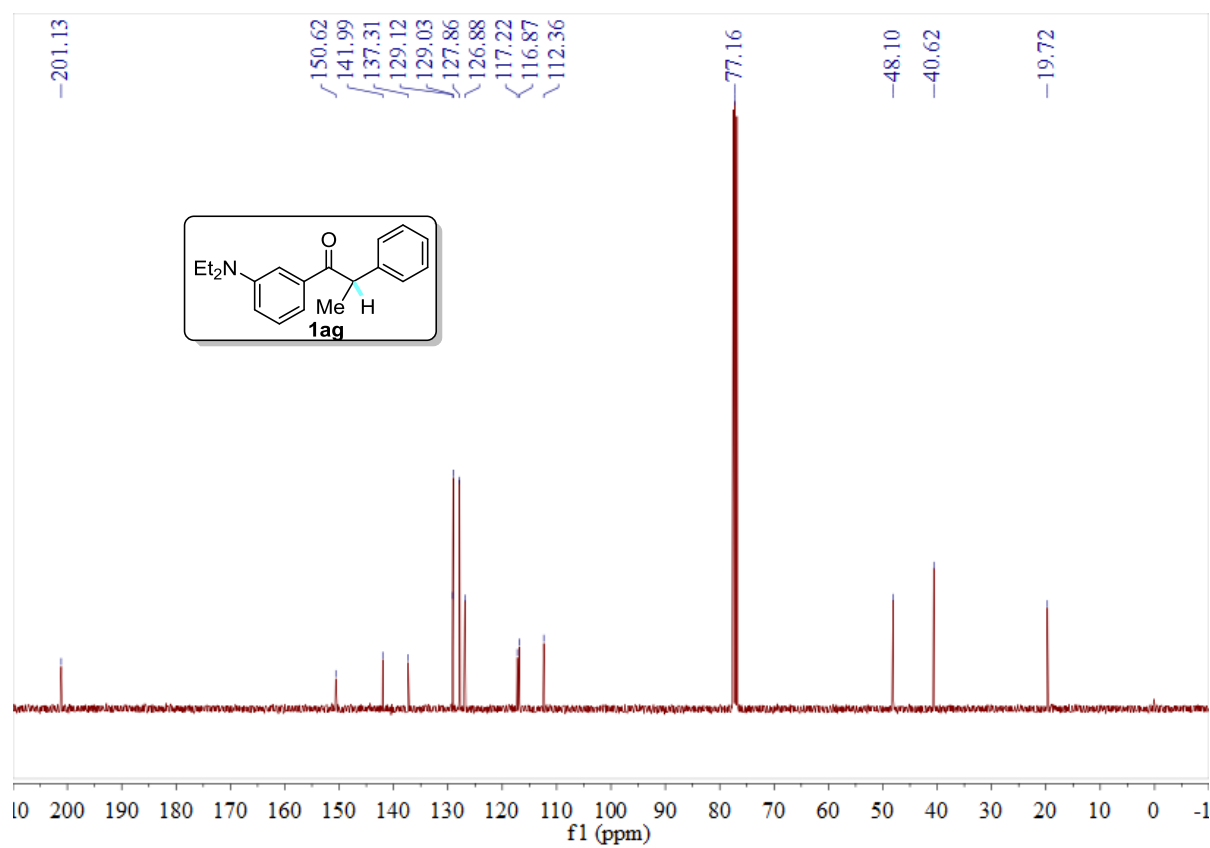

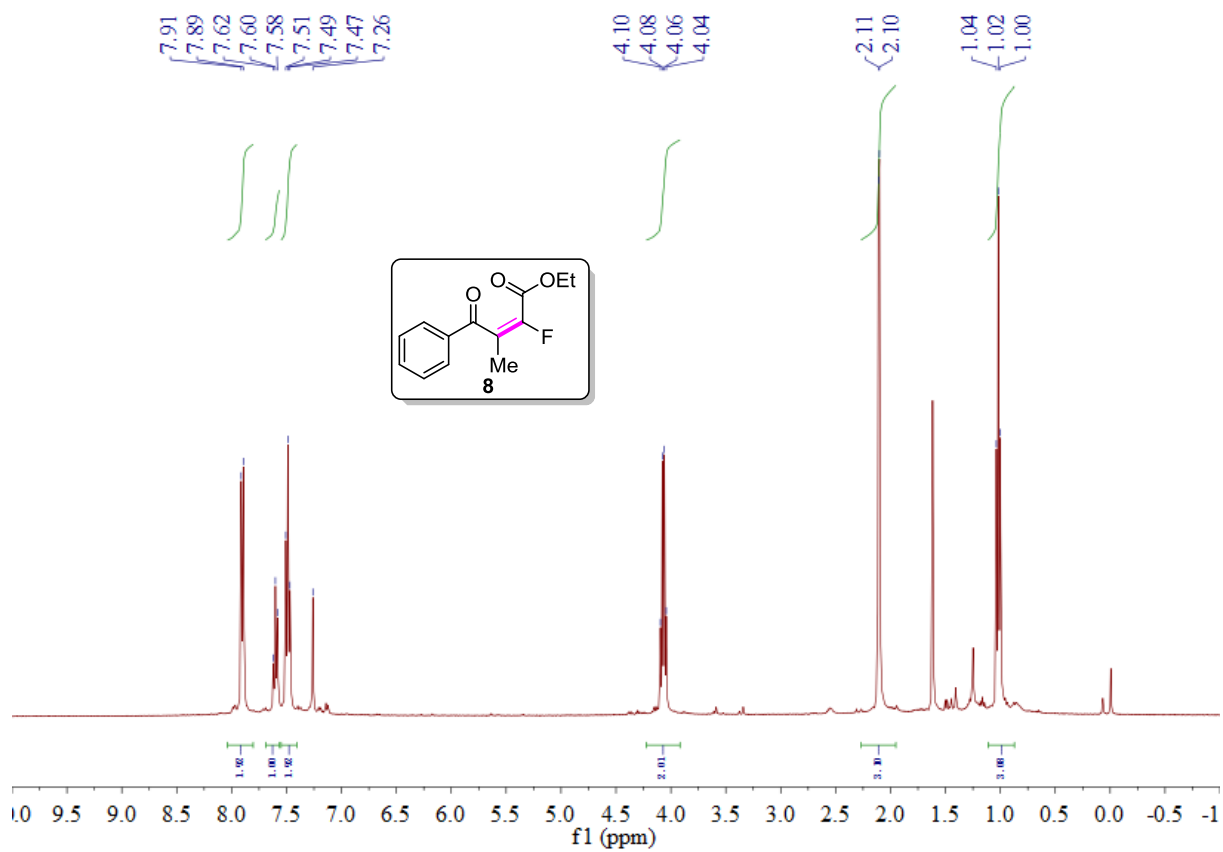

Supplementary Figure 177.  $^1\text{H}$  NMR of 8

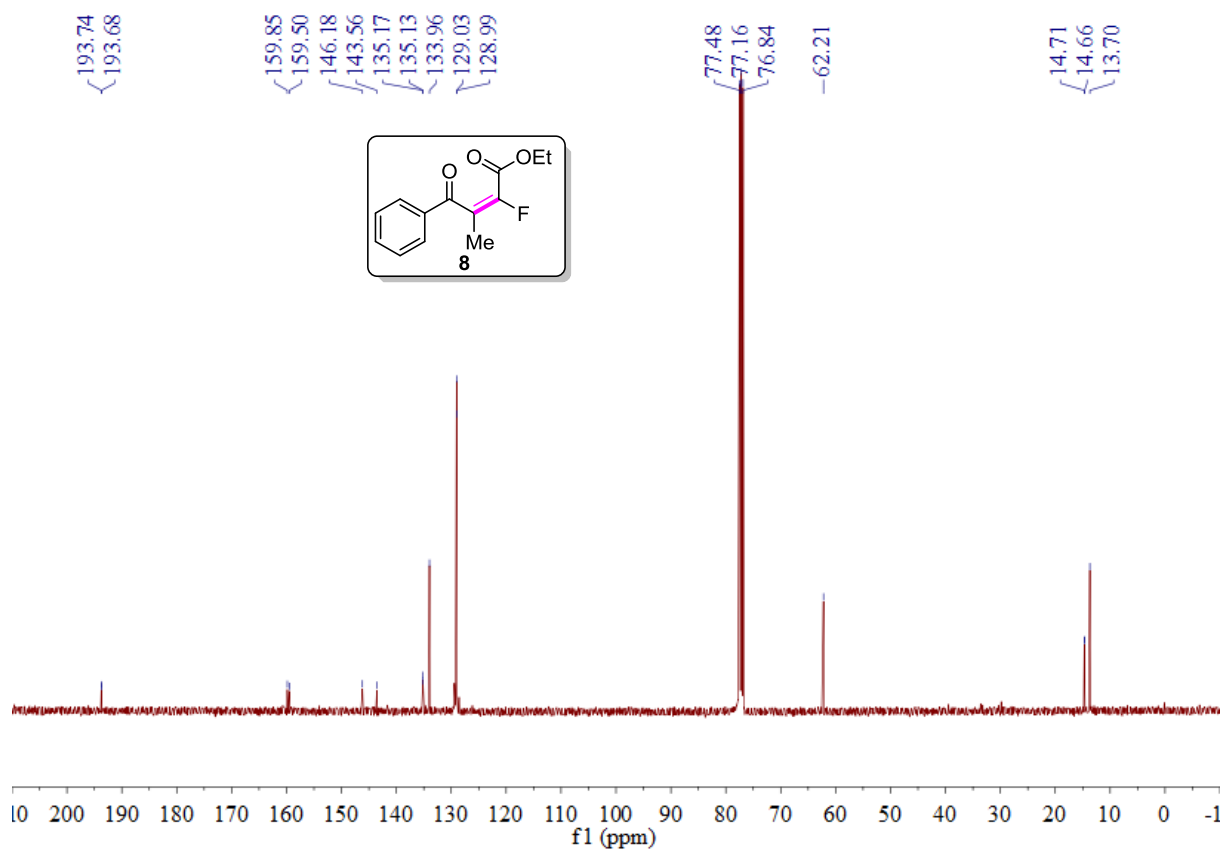

Supplementary Figure 178.  $^{13}\text{C}$  NMR of 8

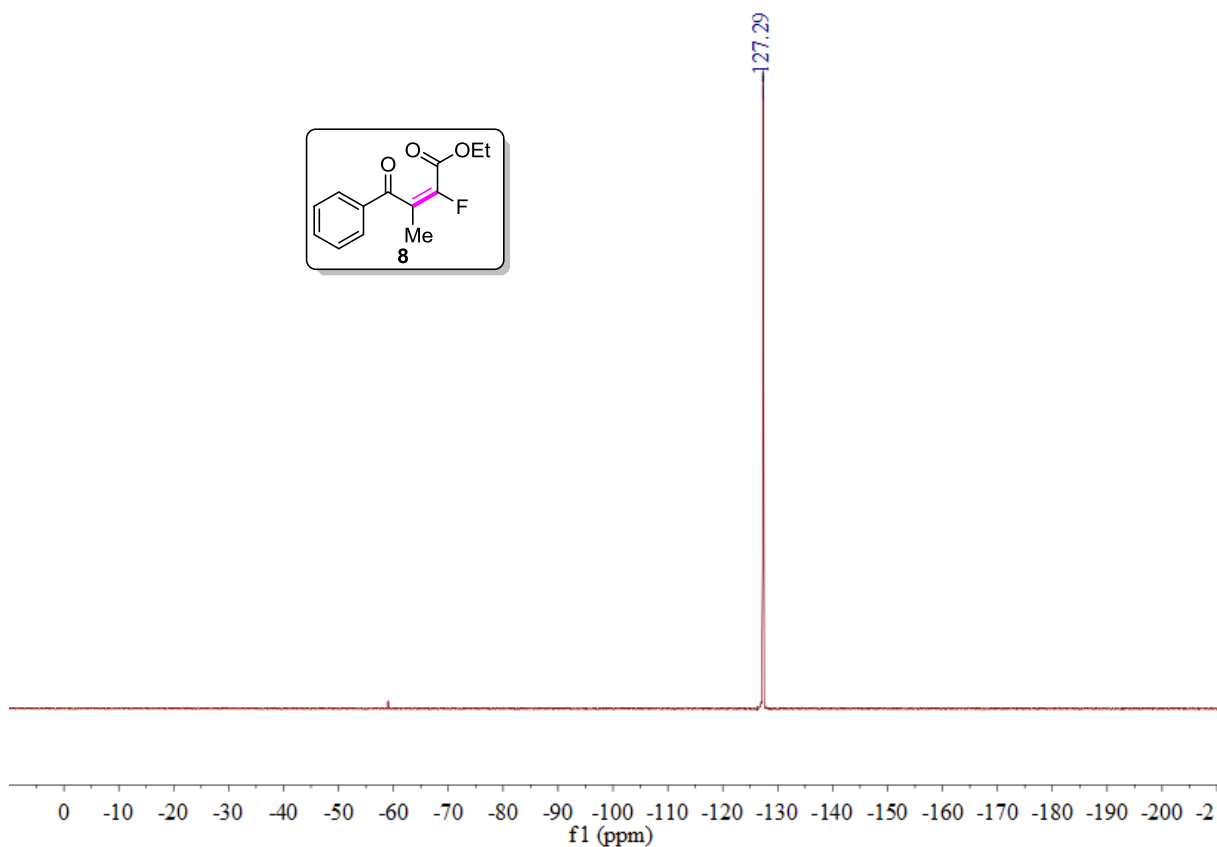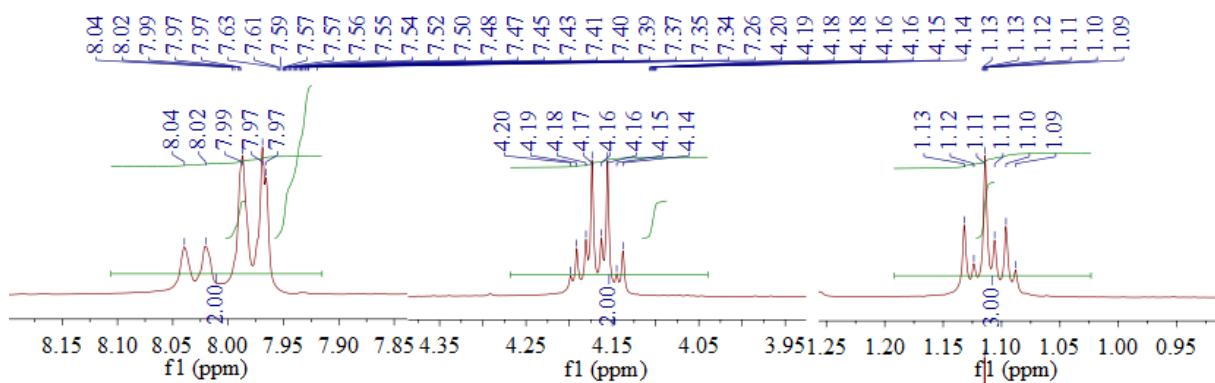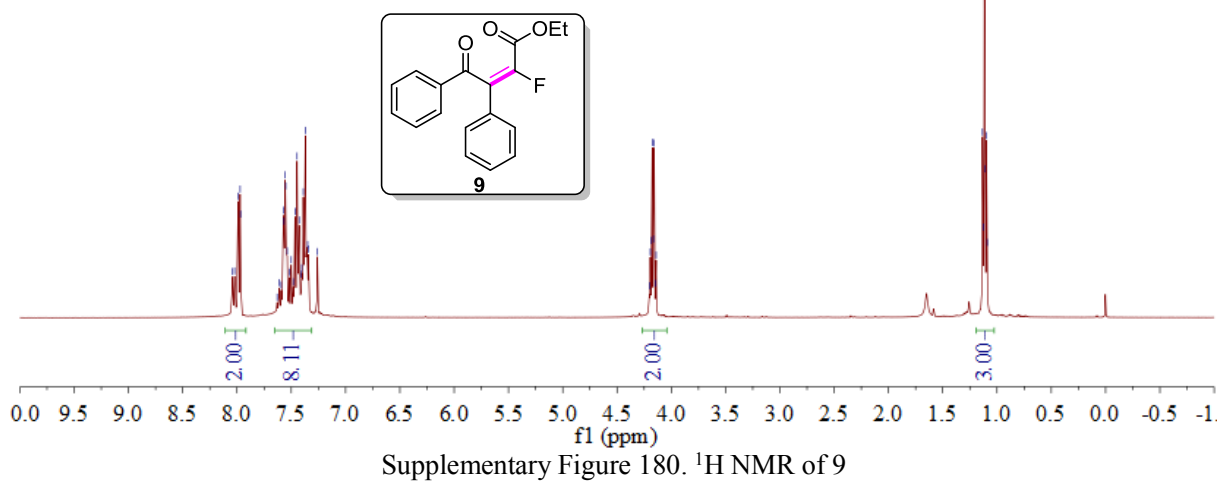

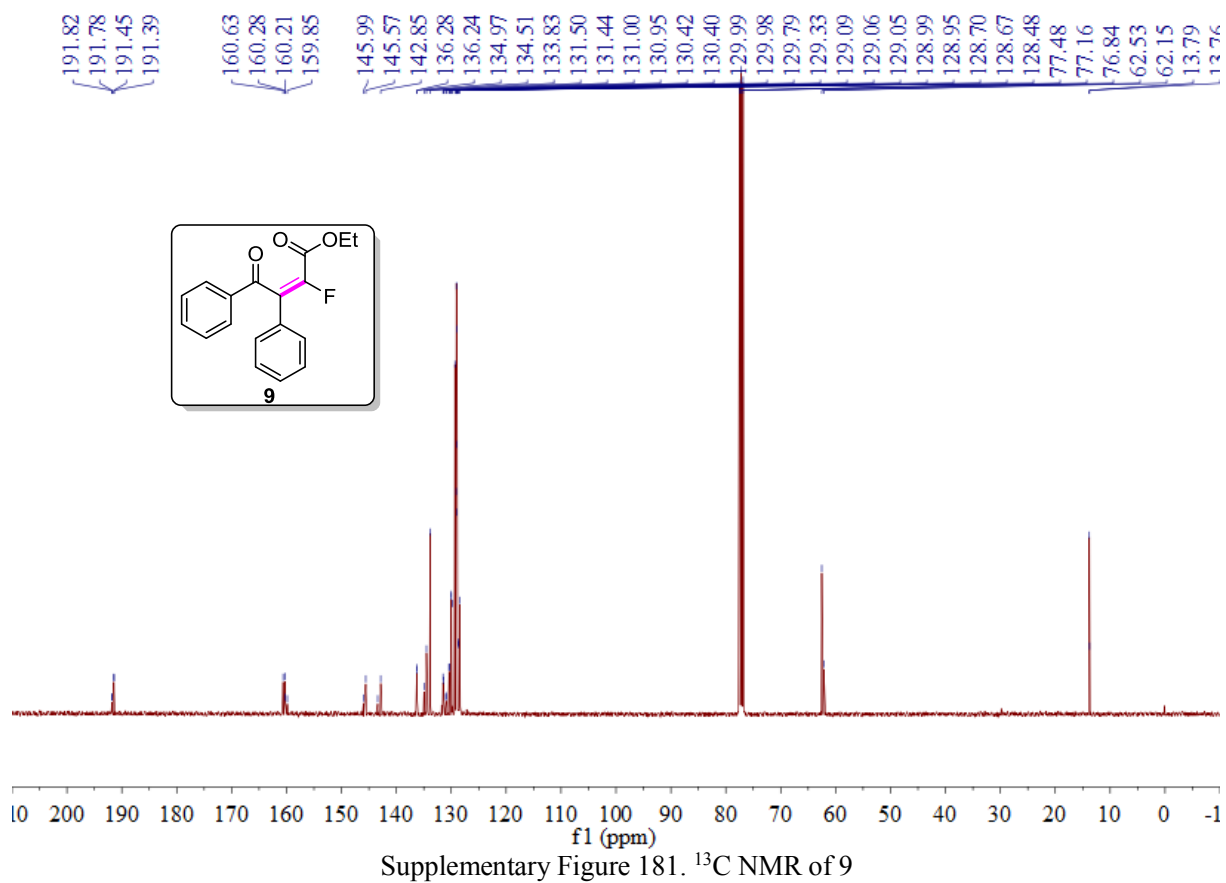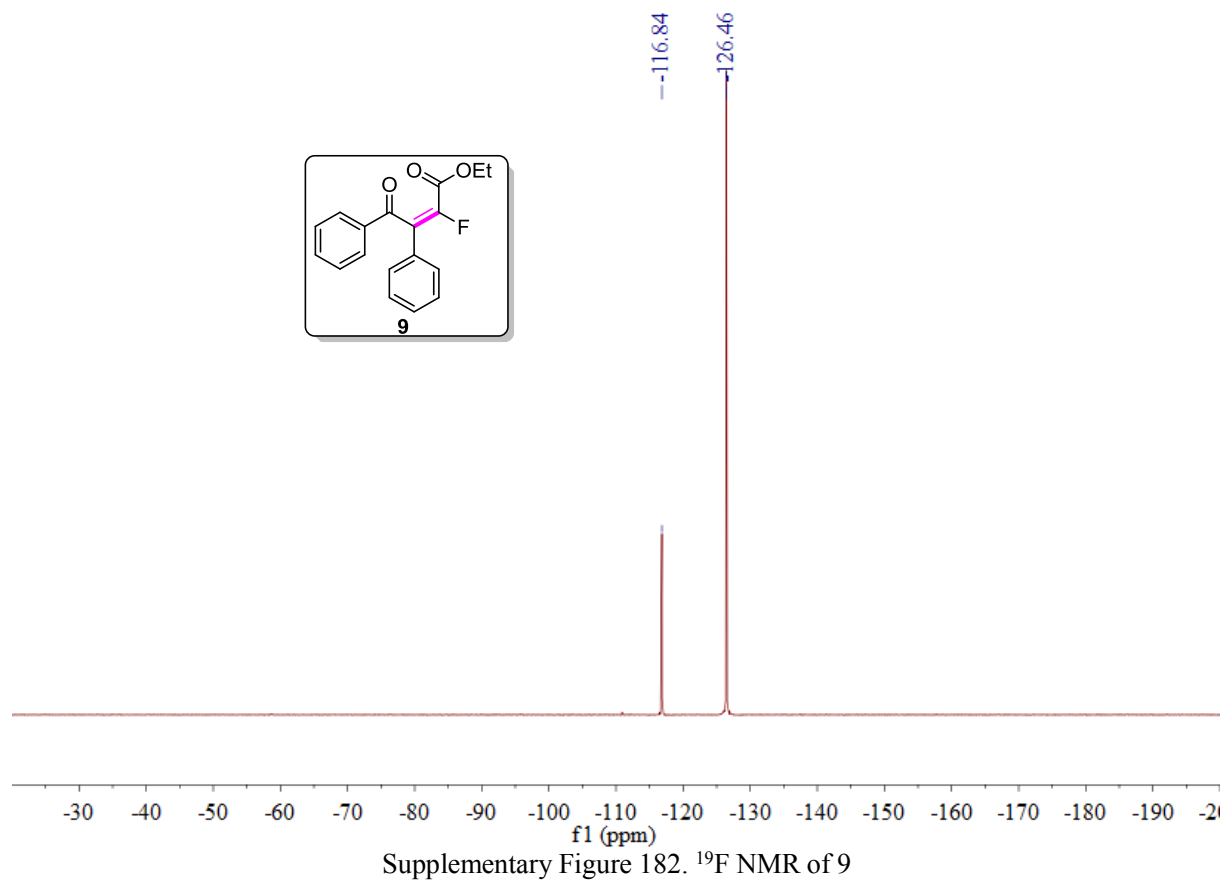

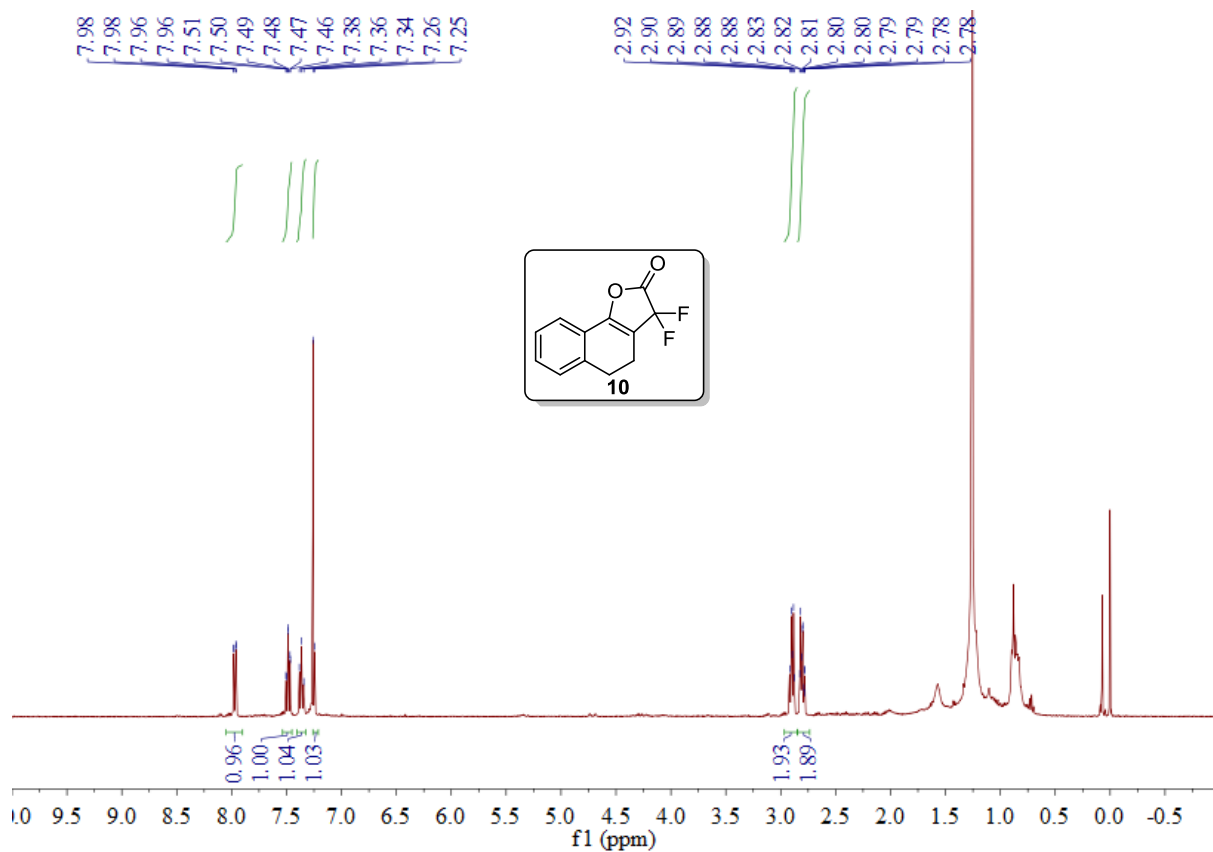

Supplementary Figure 183. <sup>1</sup>H NMR of 10

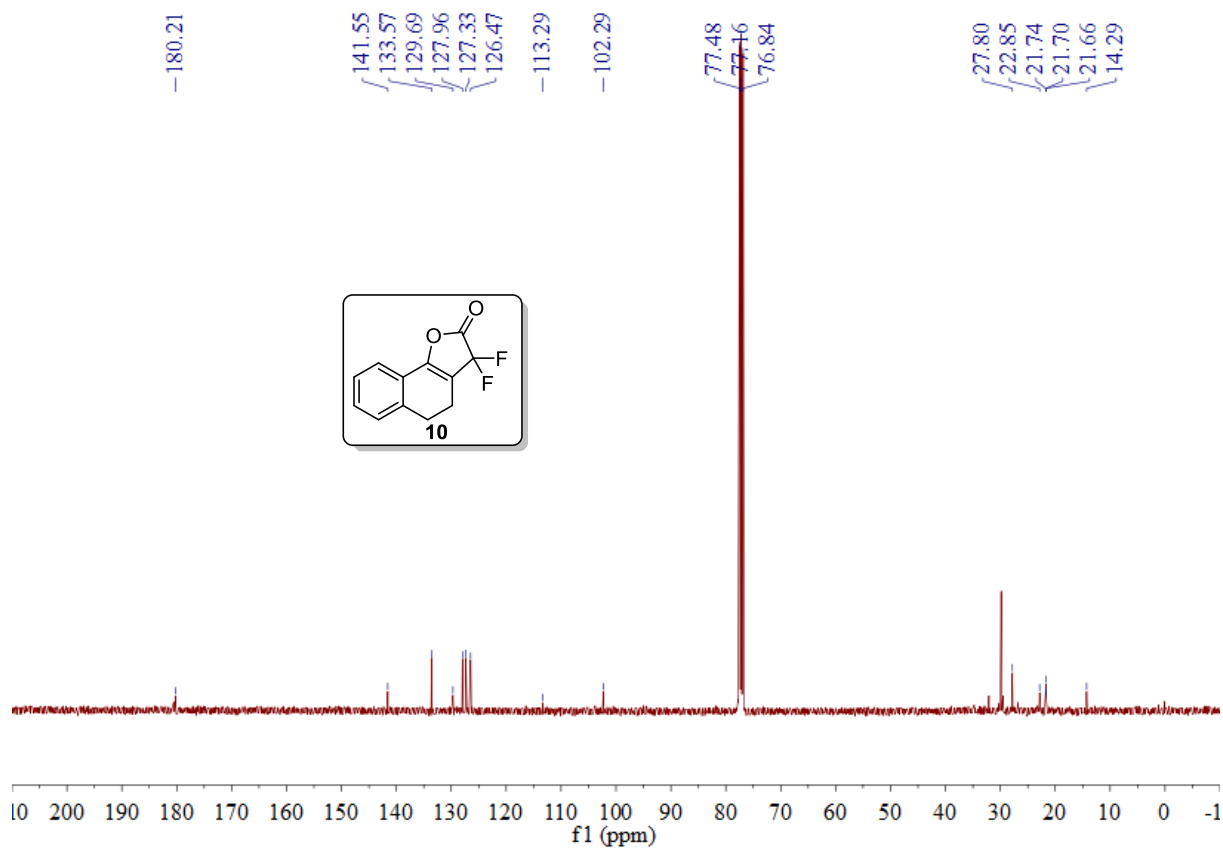

Supplementary Figure 184. <sup>13</sup>C NMR of 10

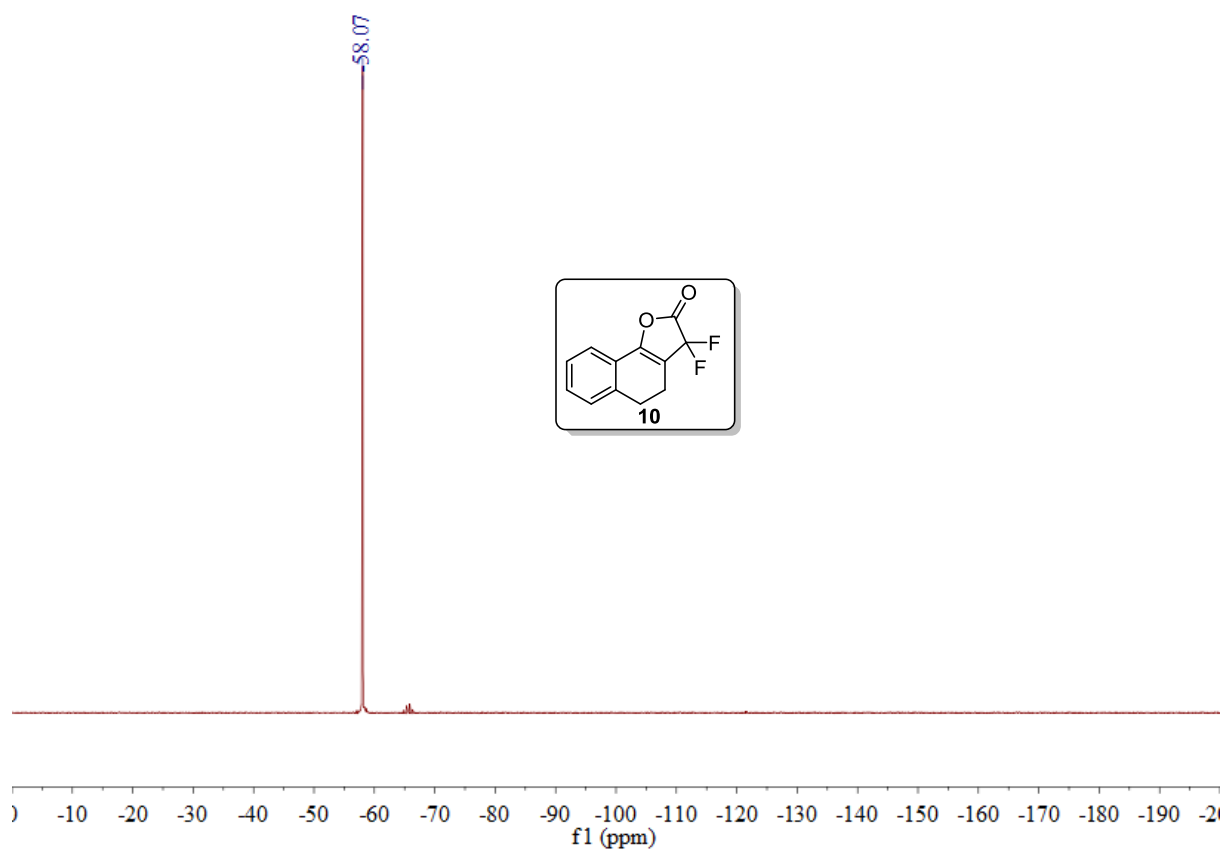

Supplementary Figure 185.  $^{19}\text{F}$  NMR of 10

### Supplementary Table 1 Base Screening<sup>[a]</sup>

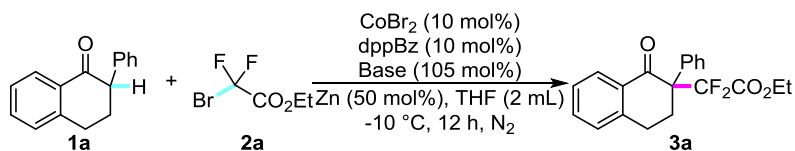

| Entry            | Base                           | Yield (%) <sup>[b]</sup> |
|------------------|--------------------------------|--------------------------|
| 1                | K <sub>2</sub> CO <sub>3</sub> | trace                    |
| 2                | KOH                            | trace                    |
| 3                | K <sub>3</sub> PO <sub>4</sub> | trace                    |
| 4 <sup>[c]</sup> | <sup>t</sup> BuOK              | trace                    |
| 5 <sup>[d]</sup> | <sup>t</sup> BuOK              | 17                       |
| 6 <sup>[e]</sup> | <sup>t</sup> BuOK              | 30                       |
| 7 <sup>[f]</sup> | <sup>t</sup> BuOK              | trace                    |
| 8                | KHMDS                          | 73                       |
| 9                | LiHMDS                         | 77                       |
| 10               | LDA                            | 90                       |

[a] General conditions: **1a** (0.2 mmol), **2a** (3 eq.), CoBr<sub>2</sub> (10 mol%), dppBz (10 mol%), Base (105 mol%), Zn (50 mol%), THF (2 mL), -10 °C, 12 h, N<sub>2</sub>.

[b] Isolated Yield. [c] No Zn. [d] Zn (30 mol%). [e] Zn (50 mol%). [f] Mn (50 mol%).

### Supplementary Table 2 Catalyst Screening<sup>[a]</sup>

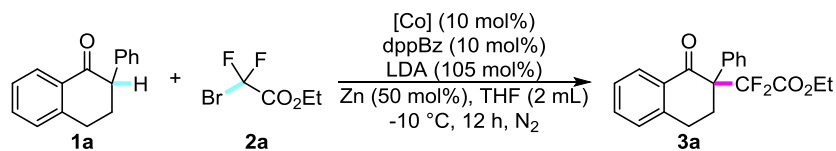

| Entry | [Co]                                    | Yield (%) <sup>[b]</sup> |
|-------|-----------------------------------------|--------------------------|
| 1     | Co(acac) <sub>2</sub>                   | 42                       |
| 2     | CoCl <sub>2</sub>                       | 61                       |
| 3     | Co(OAc) <sub>2</sub> ·4H <sub>2</sub> O | 30                       |
| 4     | CoI <sub>2</sub>                        | 83                       |
| 5     | CoC <sub>2</sub> O <sub>4</sub>         | 10                       |
| 6     | CoCl <sub>2</sub> ·dppe                 | 56                       |
| 7     | /                                       | trace                    |

[a] General conditions: **1a** (0.2 mmol), **2a** (3 eq.), [Co] (10 mol%), dppBz (10 mol%), LDA (105 mol%), Zn (50 mol%), THF (2 mL), -10 °C, 12 h, N<sub>2</sub>. [b] Isolated Yields.

### Supplementary Table 3 Ligand Screening<sup>[a]</sup>

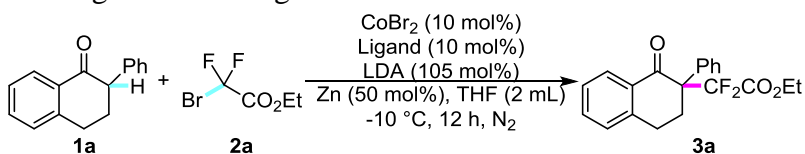

| Entry | Ligand | Yield (%) <sup>[b]</sup> | Entry | Ligand   | Yield (%) <sup>[b]</sup> |
|-------|--------|--------------------------|-------|----------|--------------------------|
| 1     | L1     | trace                    | 14    | L13      | trace                    |
| 2     | L2     | trace                    | 15    | L14      | 50                       |
| 3     | L3     | trace                    | 16    | XantPhos | 20                       |
| 4     | dppe   | 30                       | 17    | L15      | 10                       |
| 5     | L4     | 48                       | 18    | dppp     | 20                       |
| 6     | L5     | trace                    | 19    | dppBz    | 90                       |
| 7     | L6     | trace                    | 20    | L16      | 15                       |
| 8     | L7     | trace                    | 21    | L17      | 14                       |
| 9     | L8     | trace                    | 22    | Phen     | 20                       |
| 10    | L9     | trace                    | 23    | L18      | trace                    |
| 11    | L10    | 5                        | 24    | bpy      | 23                       |
| 12    | L11    | trace                    | 25    | L19      | trace                    |
| 13    | L12    | trace                    |       |          |                          |

[a] General conditions: **1a** (0.2 mmol), **2a** (3 eq.), CoBr<sub>2</sub> (10 mol%), Ligand (10 mol%), LDA (105 mol%), Zn (50 mol%), THF (2 mL), -10 °C, 12 h, N<sub>2</sub>. [b] Isolated Yield.

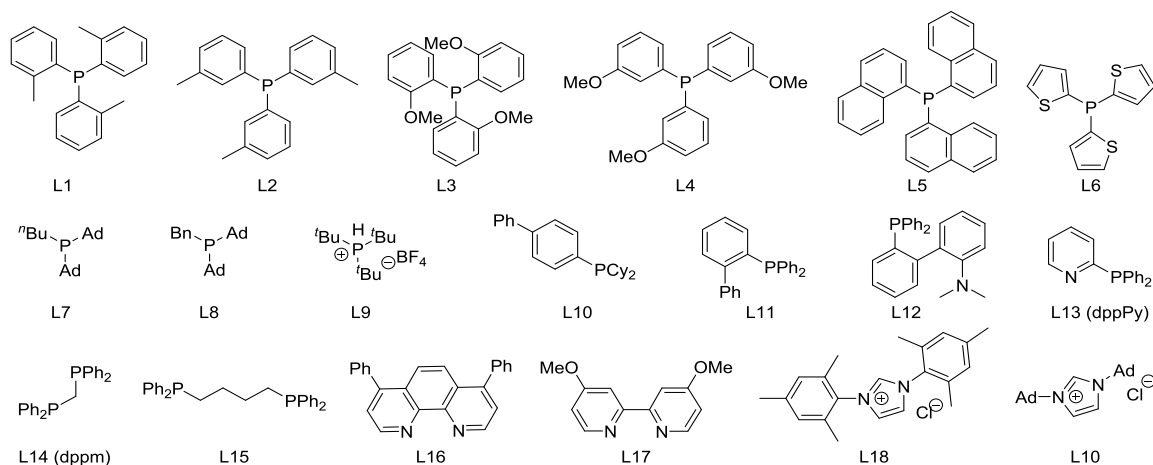

### Supplementary Table 4 Loading of Fluoroalkylating Reagents Screening<sup>[a]</sup>

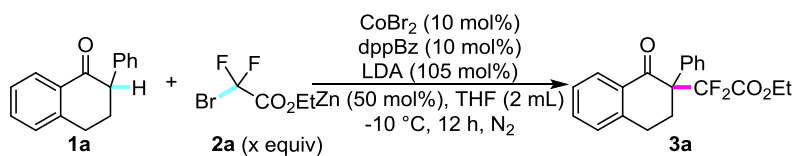

| Entry | x   | Yield (%) <sup>[b]</sup> |
|-------|-----|--------------------------|
| 1     | 1.2 | 51                       |
| 2     | 1.5 | 58                       |
| 3     | 2.0 | 83                       |
| 4     | 2.5 | 84                       |
| 5     | 4   | 73                       |
| 6     | 5   | 70                       |

[a] General conditions: **1a** (0.2 mmol), **2a** (x eq.), CoBr<sub>2</sub> (10 mol%), dppBz (10 mol%), LDA (105 mol%), Zn (50 mol%), THF (2 mL), -10 °C, 12 h, N<sub>2</sub>. [b] Isolated Yields.



### Supplementary Table 5 Temperature Screening<sup>[a]</sup>

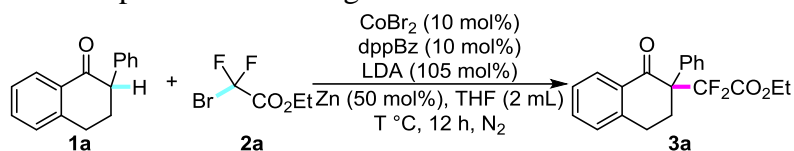

| Entry            | T/°C | yield (%) <sup>[b]</sup> |
|------------------|------|--------------------------|
| 1                | -30  | 90                       |
| 2 <sup>[c]</sup> | -10  | 90                       |
| 3                | 0    | 53                       |
| 4                | 50   | 30                       |

[a] General conditions: **1a** (0.2 mmol), **2a** (3 eq.), CoBr<sub>2</sub> (10 mol%), dppBz (10 mol%), LDA (105 mol%), Zn (50 mol%), THF (2 mL), T °C, 12 h, N<sub>2</sub>. [b] Isolated Yields. [c] t = 24 h.

### Supplementary Table 6 Solvent Screening<sup>[a]</sup>

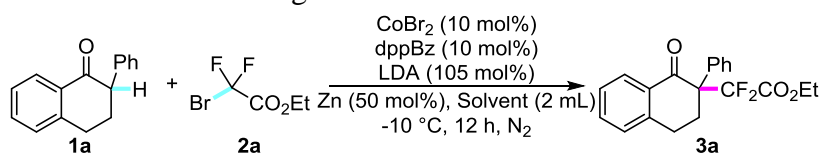

| Entry | Solvent | Yield (%) <sup>[b]</sup> |
|-------|---------|--------------------------|
| 1     | Toluene | trace                    |
| 2     | MeCN    | 0                        |
| 3     | DMF     | 0                        |
| 4     | NMP     | 0                        |
| 5     | Dioxane | 50                       |

[a] General conditions: **1a** (0.2 mmol), **2a** (3 eq.), CoBr<sub>2</sub> (10 mol%), dppBz (10 mol%), LDA (105 mol%), Zn (50 mol%), Solvent (2 mL), -10 °C, 12 h, N<sub>2</sub>. [b] Isolated Yields.

### Supplementary Figure 186 Aryl Ketones Containing Secondary $\alpha$ -C-H Bonds Used as Substrates

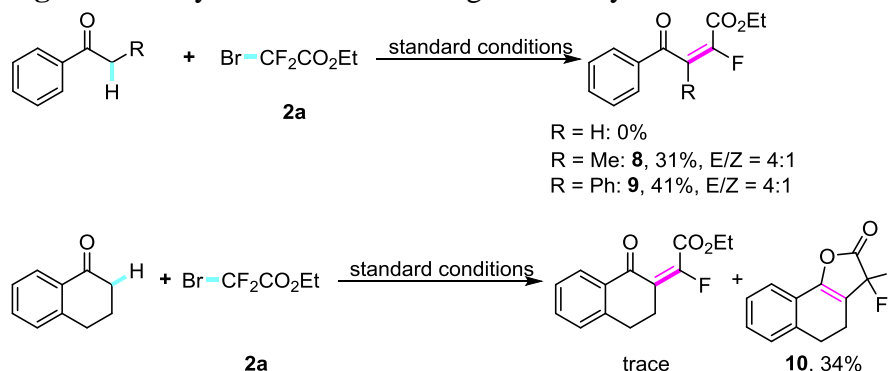

### Supplementary Methods

**General Information** NMR spectra were recorded on Bruker-400 MHz NMR spectrometer (400 MHz for <sup>1</sup>H; 101 MHz for <sup>13</sup>C and 376 MHz for <sup>19</sup>F (<sup>1</sup>H, <sup>13</sup>C decoupled)). <sup>1</sup>H NMR chemical shifts were determined relative to internal (CH<sub>3</sub>)<sub>4</sub>Si (TMS) at  $\delta$  0.00 or at the signal of a residual protonated solvent: CDCl<sub>3</sub>  $\delta$  7.26. <sup>13</sup>C NMR chemical shifts were determined relative to CDCl<sub>3</sub>  $\delta$  77.16. <sup>19</sup>F NMR chemical shifts were determined relative to CFC<sub>3</sub> at  $\delta$  0.00. Data for <sup>1</sup>H, <sup>13</sup>C, <sup>19</sup>F NMR are recorded as follows: chemical shift ( $\delta$ , ppm), multiplicity (s = singlet, d = doublet, t = triplet, m = multiplet, q = quartet, br =

broad). High resolution mass spectra were recorded on P-SIMS-Gly of BrukerDaltonics Inc. using ESI-TOF (electrospray ionization-time of flight) or Micromass GCT using EI (electron impact).

**Materials** THF was distilled from sodium immediately before use. LDA was obtained from Energy-chemical used as received (2 mol/L). CoBr<sub>2</sub> was obtained from Energy-chemical and used as received. dppBz and zinc powder were obtained from aladdin and used as received. BrCF<sub>2</sub>CO<sub>2</sub>Et was obtained from Fluorochem Ltd (UK) and used as received.

### Preparation of Substituted Aryl Ketones

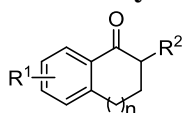

| Entry | Entry                                                       |    |                                                     |
|-------|-------------------------------------------------------------|----|-----------------------------------------------------|
| 1a    | R <sup>1</sup> = H, R <sup>2</sup> = Ph, n = 1              | 1j | R <sup>1</sup> = H, R <sup>2</sup> = Ph-Cl-3, n = 1 |
| 1b    | R <sup>1</sup> = H, R <sup>2</sup> = Me, n = 1              | 1k | R <sup>1</sup> = 5-OMe, R <sup>2</sup> = Me, n = 1  |
| 1c    | R <sup>1</sup> = H, R <sup>2</sup> = <sup>n</sup> Bu, n = 1 | 1l | R <sup>1</sup> = 7-OMe, R <sup>2</sup> = Me, n = 1  |
| 1d    | R <sup>1</sup> = H, R <sup>2</sup> = Bn, n = 1              | 1m | R <sup>1</sup> = 6-OMe, R <sup>2</sup> = Me, n = 1  |
| 1e    | R <sup>1</sup> = H, R <sup>2</sup> = <sup>t</sup> Pr, n = 1 | 1n | R <sup>1</sup> = 7-Br, R <sup>2</sup> = Me, n = 1   |
| 1f    | R <sup>1</sup> = H, R <sup>2</sup> = Ph-Me-4, n = 1         | 1o | R <sup>1</sup> = H, R <sup>2</sup> = Ph, n = 0      |
| 1g    | R <sup>1</sup> = H, R <sup>2</sup> = Ph-Cl-4, n = 1         | 1p | R <sup>1</sup> = H, R <sup>2</sup> = Me, n = 0      |
| 1h    | R <sup>1</sup> = H, R <sup>2</sup> = Ph-Br-4, n = 1         | 1q | R <sup>1</sup> = 5-Me, R <sup>2</sup> = Me, n = 0   |
| 1i    | R <sup>1</sup> = H, R <sup>2</sup> = Ph-F-4, n = 1          | 1r | R <sup>1</sup> = 5-Cl, R <sup>2</sup> = Me, n = 0   |

Substrates **1a**<sup>4</sup>, **1b**<sup>5</sup>, **1c**<sup>6</sup>, **1f-1i**<sup>6</sup>, **1k**<sup>6</sup>, **1d**<sup>7</sup>, **1e**<sup>7</sup>, **1j**<sup>7</sup>, **1l**<sup>7</sup>, **1m-1o**<sup>7</sup> were prepared in accordance with methods described in the references.

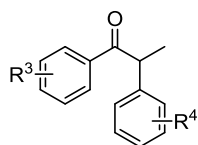

| Entry | Entry                                       |     |                                                  |
|-------|---------------------------------------------|-----|--------------------------------------------------|
| 1s    | R <sup>3</sup> = H, R <sup>4</sup> = H      | 1ab | R <sup>3</sup> = 2-Naph, R <sup>4</sup> = H      |
| 1t    | R <sup>3</sup> = 4-Me, R <sup>4</sup> = H   | 1ac | R <sup>3</sup> = H, R <sup>4</sup> = 2-Naph      |
| 1u    | R <sup>3</sup> = H, R <sup>4</sup> = 4-Me   | 1ad | R <sup>3</sup> = H, R <sup>4</sup> = 4-F         |
| 1v    | R <sup>3</sup> = 3-OMe, R <sup>4</sup> = H  | 1ae | R <sup>3</sup> = H, R <sup>4</sup> = 4-Cl        |
| 1w    | R <sup>3</sup> = 4-OMe, R <sup>4</sup> = H  | 1af | R <sup>3</sup> = 4-OMe, R <sup>4</sup> = 4-F     |
| 1x    | R <sup>3</sup> = H, R <sup>4</sup> = 3-OMe  | 1ag | R <sup>3</sup> = 3-N,N-di-Me, R <sup>4</sup> = H |
| 1y    | R <sup>3</sup> = H, R <sup>4</sup> = 4-Ph   | 1ah | R <sup>3</sup> = 3,4-di-OMe, R <sup>4</sup> = H  |
| 1z    | R <sup>3</sup> = 4-Ph, R <sup>4</sup> = H   |     |                                                  |
| 1aa   | R <sup>3</sup> = 1-Naph, R <sup>4</sup> = H |     |                                                  |

Substrates **1s-1z**<sup>1,3</sup>, **1aa-1ah**<sup>2,3</sup> were prepared in accordance with methods described in the references.

BrR<sub>f</sub>

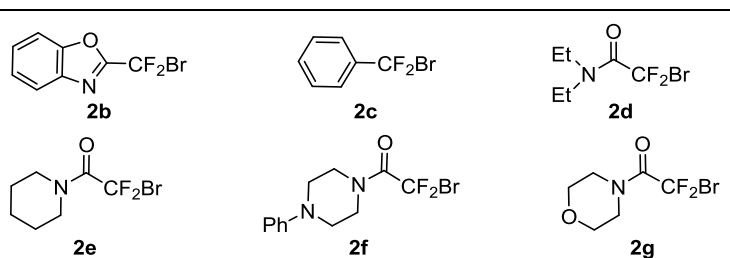

Substrates **2b**<sup>8</sup>, **2c**<sup>10</sup>, **2d**<sup>9</sup>, **2e**<sup>9</sup>, **2f**<sup>9</sup>, **2g**<sup>11</sup> were prepared in accordance with methods described in the references.

### General Procedure for Cobalt-Catalyzed Difluoroalkylation of Tertiary Aryl Ketones.

To a 50 mL of Schlenk tube was added aryl ketone **1** (1.0 equiv, 0.2 mmol), CoBr<sub>2</sub> (10 mol %, 0.02 mmol) and dppBz (10 mol %, 0.02 mmol) under air, followed by Zn (0.5 equiv, 0.1 mmol). The mixture was evacuated and backfilled with N<sub>2</sub> (3 times). THF (2 mL) was added then followed by LDA (105 mol%, 0.21 mmol) subsequently. The Schlenk tube was then sealed with a Teflon lined cap and put into a cooled bath (-10°C). After stirring for 5 minutes, bormdifluoroacetate **2a** (3.0 equiv, 0.6 mmol) was added to the reaction mixture, and the Schlenk tube was then resealed with a Teflon lined cap and put back into the cooled bath (-10°C). After stirring for another 12 hours, the reaction mixture was diluted with ethyl acetate (5 mL). The solvent was removed under reduced pressure, and the residue was purified by flash column chromatography on silica gel to give the desired product.

### Characterization Data for Alkyl Difluorides

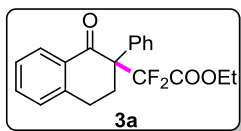

Ethyl (R)-2,2-difluoro-2-(1-oxo-2-phenyl-1,2,3,4-tetrahydronaphthalen-2-yl)acetate (**3a**). The product **3a** is purified with silica gel chromatography (petroleum ether/ethyl acetate = 10/1 as the eluent) as yellow oil (90% yield). <sup>1</sup>H NMR (400 MHz, Chloroform-*d*) δ 8.16 (d, *J* = 7.9, Hz, 1H), 7.49 – 7.41 (m, 1H), 7.26 – 7.34 (m, 6H), 7.10 (d, *J* = 7.6 Hz, 1H), 4.26 (qq, *J* = 10.7, 7.1 Hz, 2H), 3.01 (td, *J* = 13.5, 4.5 Hz, 1H), 2.92 – 2.83 (m, 2H), 2.73 – 2.64 (m, 1H), 1.22 (t, *J* = 7.1 Hz, 3H). <sup>13</sup>C NMR (101 MHz, Chloroform-*d*) δ 196.07 (t, *J* = 2.9 Hz), 163.56 (t, *J* = 32.4 Hz), 143.17, 134.19, 132.29, 131.92, 129.02, 128.74, 128.39, 128.36, 128.16, 127.00, 115.22 (t, *J* = 257.6 Hz), 62.63, 60.87 (dd, *J* = 22.4, 20.9 Hz), 28.51 (dd, *J* = 5.8, 3.2 Hz), 25.27, 13.77. <sup>19</sup>F NMR (376 MHz, Chloroform-*d*) δ -107.22 (d, *J* = 272.2 Hz, 1F), -110.19 (d, *J* = 272.1 Hz, 1F). HRMS (ESI) (*m/z*): [M+H]<sup>+</sup> calcd. for C<sub>20</sub>H<sub>19</sub>O<sub>3</sub>F<sub>2</sub>: 345.1297, found: 345.1301.

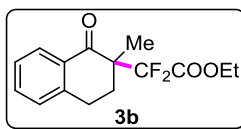

Ethyl (S)-2,2-difluoro-2-(2-methyl-1-oxo-1,2,3,4-tetrahydronaphthalen-2-yl)acetate (**3b**). The product **3b** is purified with silica gel chromatography (petroleum ether/ethyl acetate = 10/1 as the eluent) as yellow oil (64% yield). <sup>1</sup>H NMR (400 MHz, Chloroform-*d*) δ 8.01 (d, *J* = 7.7 Hz, 1H), 7.57 – 7.45 (m, 1H), 7.36 – 7.28 (m, 1H), 7.25 (d, *J* = 8.0 Hz, 1H), 4.37 (q, *J* = 7.1 Hz, 2H), 3.14 – 3.01 (m, 2H), 2.64 – 2.56 (m, 1H), 2.11 (dt, *J* = 13.7, 4.5 Hz, 1H), 1.52 (s, 3H), 1.37 (t, *J* = 7.1 Hz, 3H). <sup>13</sup>C NMR (101 MHz, Chloroform-*d*) δ 196.59 (t, *J* = 3.1 Hz), 163.74 (t, *J* = 32.3 Hz), 142.87, 134.08, 131.18, 128.81, 128.23, 127.06, 116.41 (t, *J* = 257.2 Hz), 62.91, 51.93 (t, *J* = 21.9 Hz), 28.54 (t, *J* = 4.1 Hz), 24.86, 16.75 (t, *J* = 4.2 Hz), 13.98. <sup>19</sup>F NMR (376 MHz, Chloroform-*d*) δ -111.56 (d, *J* = 266.0 Hz, 1F), -112.33 (d, *J* = 266.0 Hz, 1F). HRMS (ESI) (*m/z*): [M+H]<sup>+</sup> calcd. for C<sub>15</sub>H<sub>17</sub>O<sub>3</sub>F<sub>2</sub>: 283.1140, found: 283.1145.

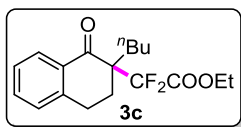

Ethyl (S)-2-(2-butyl-1-oxo-1,2,3,4-tetrahydronaphthalen-2-yl)-2,2-difluoroacetate (**3c**). The product **3c** is purified with silica gel chromatography (petroleum ether/ethyl acetate = 10/1 as the eluent) as yellow oil (40% yield). <sup>1</sup>H NMR (400 MHz, Chloroform-*d*) δ 8.02 (d, *J* = 7.8 Hz, 1H), 7.60 – 7.44 (m, 1H), 7.40 –

7.28 (m, 1H), 7.25 (d,  $J = 7.9$  Hz, 1H), 4.33 (q,  $J = 7.1$  Hz, 2H), 3.08 – 2.97 (m, 2H), 2.63 – 2.55 (m, 1H), 2.35 (dt,  $J = 13.6, 4.7$  Hz, 1H), 1.96 – 1.78 (m, 2H), 1.58 – 1.49 (m, 1H), 1.43 – 1.28 (m, 6H), 0.90 (t,  $J = 7.1$  Hz, 3H).  $^{13}\text{C}$  NMR (101 MHz, Chloroform-*d*)  $\delta$  196.82 (t,  $J = 3.5$  Hz), 163.78 (t,  $J = 32.4$  Hz), 143.09, 134.00, 131.39, 128.82, 128.23, 127.02, 117.02 (dd,  $J = 260.0, 256.6$  Hz), 62.87, 55.10 (t,  $J = 20.5$  Hz), 30.19 (t,  $J = 3.1$  Hz), 26.64, 25.21 (dd,  $J = 5.3, 3.3$  Hz), 25.04, 23.40, 13.97, 13.95.  $^{19}\text{F}$  NMR (376 MHz, Chloroform-*d*)  $\delta$  -106.55 (d,  $J = 269.9$  Hz, 1F), -107.72 (d,  $J = 269.9$  Hz, 1F). HRMS (ESI) ( $m/z$ ):  $[\text{M}+\text{Na}]^+$  calcd. for  $\text{C}_{18}\text{H}_{22}\text{O}_3\text{F}_2\text{Na}$ : 347.1429, found: 347.1434.

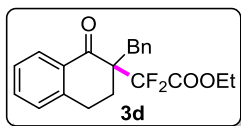

Ethyl (R)-2-(2-benzyl-1-oxo-1,2,3,4-tetrahydronaphthalen-2-yl)-2,2-difluoroacetate (**3d**). The product **3d** is purified with silica gel chromatography (petroleum ether/ethyl acetate = 10/1 as the eluent) as yellow oil (88% yield).  $^1\text{H}$  NMR (400 MHz, Chloroform-*d*)  $\delta$  8.04 (d,  $J = 7.8$  Hz, 1H), 7.48 – 7.42 (m, 1H), 7.33 – 7.27 (m, 1H), 7.20 – 7.14 (m, 5H), 7.16 (d,  $J = 5.9$  Hz, 1H), 4.40 – 4.28 (m, 2H), 3.65 (d,  $J = 13.8$  Hz, 1H), 3.12 – 3.04 (m, 1H), 3.04 (d,  $J = 13.8$  Hz, 1H), 2.74 (dt,  $J = 17.1, 6.3$  Hz, 1H), 2.47 – 2.41 (m, 1H), 2.20 – 2.13 (m, 1H), 1.33 (t,  $J = 7.1$  Hz, 3H).  $^{13}\text{C}$  NMR (101 MHz, Chloroform-*d*)  $\delta$  195.35 (t,  $J = 2.7$  Hz), 163.34 (t,  $J = 32.5$  Hz), 143.41, 135.84, 133.98, 132.49, 131.00, 128.71, 128.35, 128.15, 127.01, 126.89, 117.11 (t,  $J = 260.8$  Hz), 63.20, 55.49 (t,  $J = 19.7$  Hz), 37.28 (t,  $J = 4.0$  Hz), 26.20 (t,  $J = 3.2$  Hz), 25.42, 13.97.  $^{19}\text{F}$  NMR (376 MHz, Chloroform-*d*)  $\delta$  -106.66 (d,  $J = 262.6$  Hz, 1F), -107.38 (d,  $J = 262.5$  Hz, 1F). HRMS (ESI) ( $m/z$ ):  $[\text{M}+\text{H}]^+$  calcd. for  $\text{C}_{21}\text{H}_{21}\text{O}_3\text{F}_2$ : 359.1453, found: 359.1451.

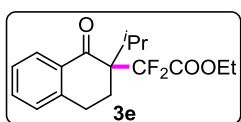

Ethyl (R)-2,2-difluoro-2-(2-isopropyl-1-oxo-1,2,3,4-tetrahydronaphthalen-2-yl)acetate (**3e**). The product **3e** is purified with silica gel chromatography (petroleum ether/ethyl acetate = 10/1 as the eluent) as yellow oil (40% yield).  $^1\text{H}$  NMR (400 MHz, Chloroform-*d*)  $\delta$  8.05 – 7.94 (m, 1H), 7.54 – 7.43 (m, 1H), 7.34 – 7.28 (m, 1H), 7.23 (d,  $J = 7.7$  Hz, 1H), 4.34 – 4.27 (m, 2H), 3.20 – 3.12 (m, 1H), 3.03 – 2.95 (m, 1H), 2.71 – 2.61 (m, 2H), 2.27 (ddd,  $J = 14.3, 8.5, 5.5$  Hz, 1H), 1.32 (t,  $J = 7.1$  Hz, 3H), 1.05 (dd,  $J = 6.9, 2.4$  Hz, 3H), 0.93 (dd,  $J = 6.9, 1.0$  Hz, 3H).  $^{13}\text{C}$  NMR (101 MHz, Chloroform-*d*)  $\delta$  197.32 (t,  $J = 4.1$  Hz), 163.71 (t,  $J = 32.3$  Hz), 143.16, 133.94, 132.74, 128.79, 127.92, 126.97, 118.36 (dd,  $J = 264.8, 255.9$  Hz), 62.97, 57.68 (t,  $J = 19.5$  Hz), 30.90, 25.70 (d,  $J = 3.0$  Hz), 22.57 (t,  $J = 4.2$  Hz), 18.88, 18.15 (d,  $J = 6.1$  Hz), 13.91.  $^{19}\text{F}$  NMR (376 MHz, Chloroform-*d*)  $\delta$  -102.26 (d,  $J = 267.8$  Hz, 1F), -104.49 (d,  $J = 267.9$  Hz, 1F). HRMS (ESI) ( $m/z$ ):  $[\text{M}+\text{H}]^+$  calcd. for  $\text{C}_{17}\text{H}_{20}\text{O}_3\text{F}_2$ : 333.1273, found: 333.1279.

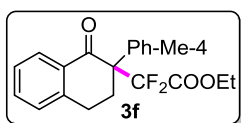

Ethyl (R)-2,2-difluoro-2-(1-oxo-2-(p-tolyl)-1,2,3,4-tetrahydronaphthalen-2-yl)acetate (**3f**). The product **3f** is purified with silica gel chromatography (petroleum ether/ethyl acetate = 10/1 as the eluent) as yellow oil (96% yield).  $^1\text{H}$  NMR (400 MHz, Chloroform-*d*)  $\delta$  8.15 (d,  $J = 7.8$  Hz, 1H), 7.48 – 7.39 (m, 1H), 7.35 – 7.28 (m, 1H), 7.23 – 7.16 (m, 2H), 7.12 – 7.08 (m, 3H), 4.34 – 4.21 (m, 2H), 2.99 (td,  $J = 13.4, 4.3$  Hz, 1H), 2.88 – 2.84 (m, 2H), 2.76 – 2.68 (m, 1H), 2.30 (s, 3H), 1.26 (t,  $J = 7.3$  Hz, 3H).  $^{13}\text{C}$  NMR (101 MHz, Chloroform-*d*)  $\delta$  196.13 (t,  $J = 3.1$  Hz), 163.64 (t,  $J = 32.3$  Hz), 143.14, 138.18, 134.08, 131.90, 129.12,

128.89, 128.71, 128.09, 126.92, 115.19 (t,  $J = 258.6$  Hz), 62.62, 60.55 (t,  $J = 22.2$  Hz), 28.33 (dd,  $J = 5.8, 3.1$  Hz), 25.27, 21.09, 13.79.  $^{19}\text{F}$  NMR (376 MHz, Chloroform-*d*)  $\delta$  -107.13 (d,  $J = 271.8$  Hz, 1F), -110.44 (d,  $J = 271.7$  Hz, 1F). HRMS (ESI) ( $m/z$ ):  $[\text{M}+\text{H}]^+$  calcd. for  $\text{C}_{21}\text{H}_{21}\text{O}_3\text{F}_2$ : 359.1453, found: 359.1459.

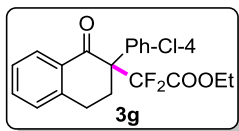

Ethyl (R)-2-(2-(4-chlorophenyl)-1-oxo-1,2,3,4-tetrahydronaphthalen-2-yl)-2,2-difluoroacetate (**3g**). The product **3g** is purified with silica gel chromatography (petroleum ether/ethyl acetate = 10/1 as the eluent) as yellow oil (88% yield).  $^1\text{H}$  NMR (400 MHz, Chloroform-*d*)  $\delta$  8.19 – 8.07 (m, 1H), 7.51 – 7.42 (m, 1H), 7.37 – 7.30 (m, 1H), 7.30 – 7.26 (m, 2H), 7.26 – 7.21 (m, 2H), 7.11 (d,  $J = 7.7$  Hz, 1H), 4.33 – 4.21 (m, 2H), 3.04 – 2.95 (m, 1H), 2.90 – 2.80 (m, 2H), 2.70 – 2.61 (m, 1H), 1.25 (t,  $J = 7.1$  Hz, 3H).  $^{13}\text{C}$  NMR (101 MHz, Chloroform-*d*)  $\delta$  195.71 (t,  $J = 2.9$  Hz), 163.43 (t,  $J = 32.3$  Hz), 142.99, 134.62, 134.47, 131.66, 130.87, 130.43, 128.83, 128.67, 128.25, 127.18, 114.98 (t,  $J = 257.9$  Hz), 62.84, 60.38 (dd,  $J = 22.7, 21.0$  Hz), 28.37 (dd,  $J = 5.8, 3.2$  Hz), 25.14, 13.84.  $^{19}\text{F}$  NMR (376 MHz, Chloroform-*d*)  $\delta$  -107.37 (d,  $J = 272.6$  Hz, 1F), -110.35 (d,  $J = 272.6$  Hz, 1F). HRMS (ESI) ( $m/z$ ):  $[\text{M}+\text{H}]^+$  calcd. for  $\text{C}_{20}\text{H}_{18}\text{O}_3\text{ClF}_2$ : 379.0907, found: 379.0909.

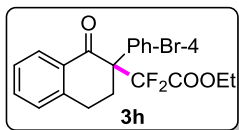

Ethyl (R)-2-(2-(4-bromophenyl)-1-oxo-1,2,3,4-tetrahydronaphthalen-2-yl)-2,2-difluoroacetate (**3h**). The product **3h** is purified with silica gel chromatography (petroleum ether/ethyl acetate = 10/1 as the eluent) as yellow oil (95% yield).  $^1\text{H}$  NMR (400 MHz, Chloroform-*d*)  $\delta$  8.18 – 8.09 (m, 1H), 7.52 – 7.38 (m, 3H), 7.36 – 7.29 (m, 1H), 7.17 (d,  $J = 8.5$  Hz, 2H), 7.11 (d,  $J = 7.7$  Hz, 1H), 4.33 – 4.21 (m, 2H), 3.03 – 2.95 (m, 1H), 2.90 – 2.80 (m, 2H), 2.70 – 2.61 (m, 1H), 1.25 (t,  $J = 7.1$  Hz, 3H).  $^{13}\text{C}$  NMR (101 MHz, Chloroform-*d*)  $\delta$  195.66 (t,  $J = 2.9$  Hz), 163.39 (t,  $J = 32.2$  Hz), 142.97, 134.48, 131.60, 131.40, 130.72, 128.83, 128.22, 127.16, 122.84, 114.89 (t,  $J = 257.9$  Hz), 62.84, 60.41 (dd,  $J = 22.7, 21.0$  Hz), 28.28 (dd,  $J = 5.7, 3.3$  Hz), 25.11, 13.83.  $^{19}\text{F}$  NMR (376 MHz, Chloroform-*d*)  $\delta$  -107.44 (d,  $J = 272.7$  Hz, 1F), -110.39 (d,  $J = 272.6$  Hz, 1F). HRMS (ESI) ( $m/z$ ):  $[\text{M}+\text{H}]^+$  calcd. for  $\text{C}_{20}\text{H}_{18}\text{O}_3\text{BrF}_2$ : 423.0402, found: 423.0400.

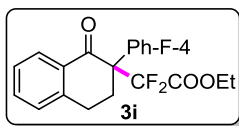

Ethyl (R)-2-(2-(4-fluorophenyl)-1-oxo-1,2,3,4-tetrahydronaphthalen-2-yl)-2,2-difluoroacetate (**3i**). The product **3i** is purified with silica gel chromatography (petroleum ether/ethyl acetate = 10/1 as the eluent) as yellow oil (88% yield).  $^1\text{H}$  NMR (400 MHz, Chloroform-*d*)  $\delta$  8.14 (d,  $J = 7.9$  Hz, 1H), 7.54 – 7.41 (m, 1H), 7.34 – 7.26 (m, 3H), 7.11 (d,  $J = 7.7$  Hz, 1H), 7.05 – 6.92 (m, 2H), 4.33 – 4.20 (m, 2H), 2.99 (td,  $J = 14.2, 13.6, 4.6$  Hz, 1H), 2.90 – 2.81 (m, 2H), 2.71 – 2.62 (m, 1H), 1.24 (t,  $J = 7.1$  Hz, 3H).  $^{13}\text{C}$  NMR (101 MHz, Chloroform-*d*)  $\delta$  195.83 (t,  $J = 2.9$  Hz), 163.47 (t,  $J = 32.3$  Hz), 162.71 (d,  $J = 248.2$  Hz), 143.01, 134.39, 131.71, 130.84 (d,  $J = 8.2$  Hz), 128.79, 128.24, 127.95, 127.13, 115.05 (t,  $J = 258.6$  Hz), 115.44 (d,  $J = 21.5$  Hz), 62.75, 60.29 (dd,  $J = 22.7, 21.1$  Hz), 28.49 (dd,  $J = 5.7, 3.2$  Hz), 25.15, 13.8.  $^{19}\text{F}$  NMR (376 MHz, Chloroform-*d*)  $\delta$  -107.44 (d,  $J = 272.4$  Hz, 1F), -110.43 (d,  $J = 272.4$  Hz, 1F), -113.53

(s, 1F). HRMS (ESI) ( $m/z$ ):  $[M+H]^+$  calcd. for  $C_{20}H_{18}O_3F_3$ : 363.1203, found: 363.1208.

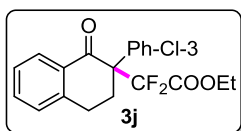

Ethyl (R)-2-(2-(3-chlorophenyl)-1-oxo-1,2,3,4-tetrahydronaphthalen-2-yl)-2,2-difluoroacetate (**3j**). The product **3j** is purified with silica gel chromatography (petroleum ether/ethyl acetate = 10/1 as the eluent) as yellow oil (88% yield).  $^1H$  NMR (400 MHz, Chloroform-*d*)  $\delta$  8.15 (d,  $J = 7.9$  Hz, 1H), 7.52 – 7.41 (m, 1H), 7.35 – 7.11 (m, 6H), 4.33 – 4.18 (m, 2H), 3.00 (td,  $J = 14.2, 13.5, 4.6$  Hz, 1H), 2.90 – 2.82 (m, 2H), 2.72 – 2.63 (m, 1H), 1.22 (t,  $J = 7.1$  Hz, 3H).  $^{13}C$  NMR (101 MHz, Chloroform-*d*)  $\delta$  195.40 (t,  $J = 2.9$  Hz), 163.28 (t,  $J = 32.3$  Hz), 143.05, 134.50, 131.61, 129.55, 129.16, 128.82, 128.70, 128.31, 127.36, 127.20, 114.96 (t,  $J = 259.6$  Hz), 62.78, 60.62 (dd,  $J = 22.7, 21.0$  Hz), 28.45 (dd,  $J = 5.7, 3.3$  Hz), 25.16, 13.76.  $^{19}F$  NMR (376 MHz, Chloroform-*d*)  $\delta$  -107.37 (d,  $J = 272.8$  Hz, 1F), -110.00 (d,  $J = 272.7$  Hz, 1F). HRMS (ESI) ( $m/z$ ):  $[M+H]^+$  calcd. for  $C_{20}H_{18}O_3ClF_2$ : 379.0907, found: 379.0914.

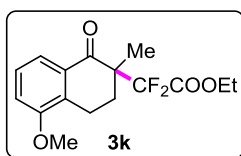

Ethyl (S)-2,2-difluoro-2-(5-methoxy-2-methyl-1-oxo-1,2,3,4-tetrahydronaphthalen-2-yl)acetate (**3k**). The product **3k** is purified with silica gel chromatography (petroleum ether/ethyl acetate = 10/1 as the eluent) as yellow oil (69% yield).  $^1H$  NMR (400 MHz, Chloroform-*d*)  $\delta$  7.57 (dd,  $J = 7.9, 0.9$  Hz, 1H), 7.23 (d,  $J = 8.0$  Hz, 1H), 7.00 (dd,  $J = 8.1, 0.8$  Hz, 1H), 4.32 (q,  $J = 7.1$  Hz, 2H), 3.83 (s, 3H), 3.11 (dt,  $J = 18.3, 4.7$  Hz, 1H), 2.80 – 2.72 (m, 1H), 2.51 (ddd,  $J = 13.8, 11.2, 5.5$  Hz, 1H), 2.11 – 2.05 (m, 1H), 1.46 (s, 3H), 1.33 (t,  $J = 7.2$  Hz, 3H).  $^{13}C$  NMR (101 MHz, Chloroform-*d*)  $\delta$  196.99 (t,  $J = 2.8$  Hz), 163.85 (t,  $J = 32.3$  Hz), 156.70, 131.96, 127.30, 119.67, 116.35 (t,  $J = 256.9$  Hz), 114.73, 62.87, 55.81, 51.66 (t,  $J = 21.9$  Hz), 27.67 (t,  $J = 4.3$  Hz), 18.71, 16.52 (t,  $J = 4.2$  Hz), 14.00.  $^{19}F$  NMR (376 MHz, Chloroform-*d*)  $\delta$  -111.92 (d,  $J = 266.6$  Hz, 1F), -112.67 (d,  $J = 266.6$  Hz, 1F). HRMS (ESI) ( $m/z$ ):  $[M+Na]^+$  calcd. for  $C_{16}H_{18}F_2NaO_4$ : 335.1071, found: 335.1075.

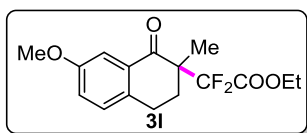

Ethyl (S)-2,2-difluoro-2-(7-methoxy-2-methyl-1-oxo-1,2,3,4-tetrahydronaphthalen-2-yl)acetate (**3l**). The product **3l** is purified with silica gel chromatography (petroleum ether/ethyl acetate = 10/1 as the eluent) as yellow oil (85% yield).  $^1H$  NMR (400 MHz, Chloroform-*d*)  $\delta$  7.47 (d,  $J = 2.8$  Hz, 1H), 7.15 (d,  $J = 8.4$  Hz, 1H), 7.08 (dd,  $J = 8.4, 2.8$  Hz, 1H), 4.37 (q,  $J = 7.1$  Hz, 2H), 3.81 (s, 3H), 3.06 – 2.93 (m, 2H), 2.60 – 2.53 (m, 1H), 2.08 (dt,  $J = 13.6, 4.6$  Hz, 1H), 1.50 (s, 3H), 1.37 (t,  $J = 7.1$  Hz, 3H).  $^{13}C$  NMR (101 MHz, Chloroform-*d*)  $\delta$  196.66 (t,  $J = 3.1$  Hz), 163.77 (t,  $J = 32.3$  Hz), 158.60, 135.47, 131.79, 130.05, 122.76, 116.39 (t,  $J = 257.1$  Hz), 109.77, 62.89, 55.56, 51.86 (t,  $J = 22.0$  Hz), 28.60 (dd,  $J = 5.1, 4.0$  Hz), 24.02, 16.64 (t,  $J = 4.1$  Hz), 13.99.  $^{19}F$  NMR (376 MHz, Chloroform-*d*)  $\delta$  -111.59 (d,  $J = 266.2$  Hz, 1F), -112.41 (d,  $J = 266.2$  Hz, 1F). HRMS (ESI) ( $m/z$ ):  $[M+H]^+$  calcd. for  $C_{16}H_{19}O_4F_2$ : 313.1246, found: 313.1244.

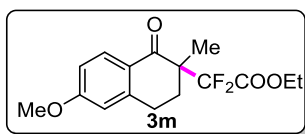

Ethyl (S)-2,2-difluoro-2-(6-methoxy-2-methyl-1-oxo-1,2,3,4-tetrahydronaphthalen-2-yl)acetate (**3m**). The product **3m** is purified with silica gel chromatography (petroleum ether/ethyl acetate = 10/1 as the eluent) as yellow oil (75% yield). <sup>1</sup>H NMR (400 MHz, Chloroform-*d*) δ 7.98 (d, *J* = 8.8 Hz, 1H), 6.83 (dd, *J* = 8.8, 2.4 Hz, 1H), 6.68 (d, *J* = 2.1 Hz, 1H), 4.37 (q, *J* = 7.1 Hz, 2H), 3.85 (s, 3H), 3.11 - 2.96 (m, 2H), 2.58 (ddd, *J* = 13.7, 11.1, 5.6 Hz, 1H), 2.11 - 2.04 (m, 1H), 1.50 (s, 3H), 1.37 (t, *J* = 7.1 Hz, 3H). <sup>13</sup>C NMR (101 MHz, Chloroform-*d*) δ 195.34 (t, *J* = 2.8 Hz), 164.20, 163.86 (t, *J* = 32.3 Hz), 145.44, 130.79, 124.69, 116.57 (t, *J* = 258.0 Hz), 113.81, 112.47, 62.86, 55.62, 51.79 (t, *J* = 21.9 Hz), 28.56 (dd, *J* = 5.3, 3.4 Hz), 25.31, 16.99 (t, *J* = 4.2 Hz), 14.01. <sup>19</sup>F NMR (376 MHz, Chloroform-*d*) δ -111.62 (d, *J* = 264.7 Hz, 1F), -112.54 (d, *J* = 264.8 Hz, 1F). HRMS (ESI) (*m/z*): [M+H]<sup>+</sup> calcd. for C<sub>16</sub>H<sub>19</sub>O<sub>4</sub>F<sub>2</sub>: 313.1246, found: 313.1252.

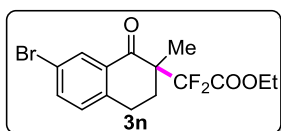

Ethyl (S)-2-(7-bromo-2-methyl-1-oxo-1,2,3,4-tetrahydronaphthalen-2-yl)-2,2-difluoroacetate (**3n**). The product **3n** is purified with silica gel chromatography (petroleum ether/ethyl acetate = 10/1 as the eluent) as yellow oil (65% yield). <sup>1</sup>H NMR (400 MHz, Chloroform-*d*) δ 8.12 (d, *J* = 2.2 Hz, 1H), 7.60 (dd, *J* = 8.2, 2.2 Hz, 1H), 7.14 (d, *J* = 8.2 Hz, 1H), 4.36 (q, *J* = 7.1 Hz, 2H), 3.01 (dd, *J* = 8.0, 4.9 Hz, 2H), 2.57 (dt, *J* = 13.9, 8.1 Hz, 1H), 2.10 (dt, *J* = 13.8, 4.8 Hz, 1H), 1.48 (s, 3H), 1.36 (t, *J* = 7.2 Hz, 3H). <sup>13</sup>C NMR (101 MHz, Chloroform-*d*) δ 195.32 (t, *J* = 2.8 Hz), 163.52 (t, *J* = 32.2 Hz), 141.58, 136.83, 132.69, 130.94, 130.66, 121.07, 116.22 (t, *J* = 257.8 Hz), 63.05, 51.63 (t, *J* = 21.9 Hz), 28.47 (t, *J* = 4.2 Hz), 24.47, 16.72 (t, *J* = 4.2 Hz), 13.98. <sup>19</sup>F NMR (376 MHz, Chloroform-*d*) δ -111.57 (s, 2F). HRMS (ESI) (*m/z*): [M+H]<sup>+</sup> calcd. for C<sub>15</sub>H<sub>16</sub>O<sub>3</sub>BrF<sub>2</sub>: 361.0245, found: 361.0253.

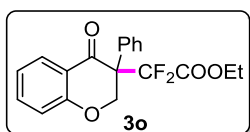

Ethyl (S)-2,2-difluoro-2-(4-oxo-3-phenylchroman-3-yl)acetate (**3o**). The product **3o** is purified with silica gel chromatography (petroleum ether/ethyl acetate = 10/1 as the eluent) as yellow oil (50% yield). <sup>1</sup>H NMR (400 MHz, Chloroform-*d*) δ 7.97 (d, *J* = 7.9 Hz, 1H), 7.44 - 7.33 (m, 6H), 7.07 - 6.98 (m, 1H), 6.83 (d, *J* = 8.4 Hz, 1H), 5.23 (t, *J* = 12.0, 2H), 4.36 - 4.24 (m, 2H), 1.28 (t, *J* = 7.2 Hz, 3H). <sup>13</sup>C NMR (101 MHz, Chloroform-*d*) δ 190.20 (dd, *J* = 4.2, 1.1 Hz), 163.14 (t, *J* = 31.8 Hz), 160.66, 136.64, 129.59 (d, *J* = 2.4 Hz), 129.01, 128.62, 127.93, 122.01, 120.21, 117.80, 113.89 (dd, *J* = 263.8, 254.2 Hz), 69.34 (dd, *J* = 8.8, 3.7 Hz), 63.28, 59.18 (t, *J* = 21.1 Hz), 13.84. <sup>19</sup>F NMR (376 MHz, Chloroform-*d*) δ -103.58 (d, *J* = 278.9 Hz, 1F), -110.21 (d, *J* = 278.9 Hz, 1F). HRMS (ESI) (*m/z*): [M+Na]<sup>+</sup> calcd. for C<sub>19</sub>H<sub>16</sub>O<sub>4</sub>F<sub>2</sub>Na: 369.0909, found: 369.0912.

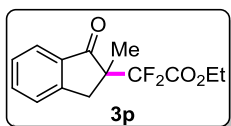

Ethyl (S)-2,2-difluoro-2-(2-methyl-1-oxo-2,3-dihydro-1H-inden-2-yl)acetate (**3p**). The product **3p** is

purified with silica gel chromatography (petroleum ether/ethyl acetate = 10/1 as the eluent) as yellow oil (50% yield).  $^1\text{H}$  NMR (400 MHz, Chloroform-*d*)  $\delta$  7.78 (d,  $J = 7.6$  Hz, 1H), 7.66 – 7.58 (m, 1H), 7.46 (d,  $J = 7.6$  Hz, 1H), 7.43 – 7.37 (m, 1H), 4.21 (q,  $J = 7.1$  Hz, 2H), 3.59 (d,  $J = 17.6$  Hz, 1H), 2.94 (d,  $J = 17.7$  Hz, 1H), 1.49 (s, 3H), 1.20 (t,  $J = 7.1$  Hz, 3H).  $^{13}\text{C}$  NMR (101 MHz, Chloroform-*d*)  $\delta$  202.57 (t,  $J = 2.7$  Hz), 162.91 (t,  $J = 32.8$  Hz), 151.49, 135.60, 135.34 (t,  $J = 2.1$  Hz), 128.09, 126.60, 124.85, 115.93 (t,  $J = 257.8$  Hz), 63.17, 53.77 (t,  $J = 21.7$  Hz), 37.06, 18.96 (t,  $J = 4.6$  Hz), 13.80.  $^{19}\text{F}$  NMR (376 MHz, Chloroform-*d*)  $\delta$  -109.86 (d,  $J = 264.1$  Hz, 1F), -110.58 (d,  $J = 264.2$  Hz, 1F). HRMS (ESI) ( $m/z$ ):  $[\text{M}+\text{H}]^+$  calcd. for  $\text{C}_{14}\text{H}_{15}\text{O}_3\text{F}_2$ : 269.0984, found: 269.0994.

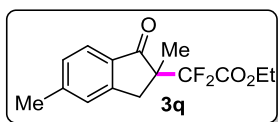

Ethyl (S)-2-(2,5-dimethyl-1-oxo-2,3-dihydro-1H-inden-2-yl)-2,2-difluoroacetate (**3q**). The product **3q** is purified with silica gel chromatography (petroleum ether/ethyl acetate = 10/1 as the eluent) as yellow oil (64% yield).  $^1\text{H}$  NMR (400 MHz, Chloroform-*d*)  $\delta$  7.57 (s, 1H), 7.44 (dd,  $J = 7.8, 1.2$  Hz, 1H), 7.34 (d,  $J = 7.8$  Hz, 1H), 4.22 (q,  $J = 7.1$  Hz, 2H), 3.53 (d,  $J = 17.5$  Hz, 1H), 2.88 (d,  $J = 17.5$  Hz, 1H), 2.40 (s, 3H), 1.48 (s, 3H), 1.21 (t,  $J = 7.2$  Hz, 3H).  $^{13}\text{C}$  NMR (101 MHz, Chloroform-*d*)  $\delta$  202.66 (t,  $J = 2.8$  Hz), 162.96 (t,  $J = 32.7$  Hz), 148.87, 138.12, 136.89, 135.48, 126.26, 124.70, 115.99 (t,  $J = 257.8$  Hz), 63.15, 54.07 (t,  $J = 21.6$  Hz), 36.70 (t,  $J = 3.4$  Hz), 21.20, 19.00 (t,  $J = 4.7$  Hz), 13.82.  $^{19}\text{F}$  NMR (376 MHz, Chloroform-*d*)  $\delta$  -110.25 (s, 2F). HRMS (ESI) ( $m/z$ ):  $[\text{M}+\text{Na}]^+$  calcd. for  $\text{C}_{15}\text{H}_{16}\text{F}_2\text{NaO}_3$ : 305.0965, found: 305.0965.

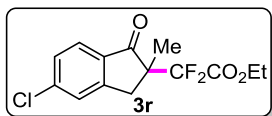

Ethyl (S)-2-(5-chloro-2-methyl-1-oxo-2,3-dihydro-1H-inden-2-yl)-2,2-difluoroacetate (**3r**). The product **3r** is purified with silica gel chromatography (petroleum ether/ethyl acetate = 10/1 as the eluent) as yellow oil (53% yield).  $^1\text{H}$  NMR (400 MHz, Chloroform-*d*)  $\delta$  7.71 (d,  $J = 8.2$  Hz, 1H), 7.46 (s, 1H), 7.39 (d,  $J = 8.2$  Hz, 1H), 4.24 (q,  $J = 7.1$  Hz, 2H), 3.57 (d,  $J = 17.8$  Hz, 1H), 2.92 (d,  $J = 17.8$  Hz, 1H), 1.48 (s, 3H), 1.24 (t,  $J = 7.1$  Hz, 3H).  $^{13}\text{C}$  NMR (101 MHz, Chloroform-*d*)  $\delta$  201.16 (t,  $J = 2.9$  Hz), 162.78 (t,  $J = 32.5$  Hz), 152.91, 142.21, 133.77 (t,  $J = 2.1$  Hz), 128.97, 126.83, 125.95, 115.76 (t,  $J = 258.1$  Hz), 63.32, 53.98 (t,  $J = 21.8$  Hz), 36.79 (t,  $J = 3.5$  Hz), 18.99 (t,  $J = 4.6$  Hz), 13.87.  $^{19}\text{F}$  NMR (376 MHz, Chloroform-*d*)  $\delta$  -110.10 (s, 2F). HRMS (ESI) ( $m/z$ ):  $[\text{M}+\text{Na}]^+$  calcd. for  $\text{C}_{14}\text{H}_{13}\text{ClF}_2\text{NaO}_3$ : 325.0419, found: 325.0419.

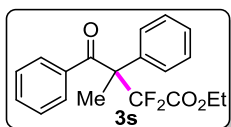

Ethyl (R)-2,2-difluoro-3-methyl-4-oxo-3,4-diphenylbutanoate (**3s**). The product **3s** is purified with silica gel chromatography (petroleum ether/ethyl acetate = 10/1 as the eluent) as yellow oil (80% yield).  $^1\text{H}$  NMR (400 MHz, Chloroform-*d*)  $\delta$  7.48 (d,  $J = 8.0$  Hz, 2H), 7.44 – 7.38 (m, 6H), 7.29 – 7.20 (m, 2H), 4.41 – 4.29 (m, 2H), 2.12 (s, 3H), 1.36 (t,  $J = 7.1$  Hz, 3H).  $^{13}\text{C}$  NMR (101 MHz, Chloroform-*d*)  $\delta$  199.36 (d,  $J = 4.6$  Hz), 163.98 (t,  $J = 32.3$  Hz), 136.00, 134.55, 132.95, 130.24, 129.43, 128.69, 128.44, 128.28, 114.66 (dd,  $J = 262.6, 252.8$  Hz), 62.72, 61.90 (dd,  $J = 22.8, 20.0$  Hz), 20.45 (dd,  $J = 5.9, 3.3$  Hz), 13.96.  $^{19}\text{F}$  NMR (376 MHz, Chloroform-*d*)  $\delta$  -106.64 (d,  $J = 270.4$  Hz, 1F), -111.89 (d,  $J = 270.5$  Hz, 1F). HRMS (ESI) ( $m/z$ ):  $[\text{M}+\text{H}]^+$  calcd. for  $\text{C}_{19}\text{H}_{19}\text{O}_3\text{F}_2$ : 333.1297, found: 333.1294.



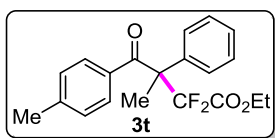

Ethyl (R)-2,2-difluoro-3-methyl-4-oxo-3-phenyl-4-(p-tolyl)butanoate (**3t**). The product **3t** is purified with silica gel chromatography (petroleum ether/ethyl acetate = 10/1 as the eluent) as yellow oil (75% yield).  $^1\text{H}$  NMR (400 MHz, Chloroform-*d*)  $\delta$  7.41 – 7.35 (m, 7H), 7.05 (d,  $J$  = 8.1 Hz, 2H), 4.41 – 4.30 (m, 2H), 2.31 (s, 3H), 2.13 (s, 3H), 1.37 (t,  $J$  = 7.1 Hz, 3H).  $^{13}\text{C}$  NMR (101 MHz, Chloroform-*d*)  $\delta$  198.94 (d,  $J$  = 4.6 Hz), 164.06 (t,  $J$  = 32.3 Hz), 143.89, 136.33, 131.84, 130.48, 129.51, 128.98, 128.59, 128.36, 114.72 (dd,  $J$  = 262.5, 252.5 Hz), 62.67, 61.95 (dd,  $J$  = 22.9, 19.9 Hz), 21.65, 20.58 (dd,  $J$  = 6.0, 3.3 Hz), 13.97.  $^{19}\text{F}$  NMR (376 MHz, Chloroform-*d*)  $\delta$  -106.79 (d,  $J$  = 270.0 Hz, 1F), -112.07 (d,  $J$  = 270.0 Hz, 1F). HRMS (ESI) ( $m/z$ ):  $[\text{M}+\text{H}]^+$  calcd. for  $\text{C}_{20}\text{H}_{21}\text{O}_3\text{F}_2$ : 347.1453, found: 347.1455.

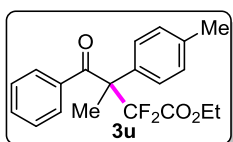

Ethyl (R)-2,2-difluoro-3-methyl-4-oxo-4-phenyl-3-(p-tolyl)butanoate (**3u**). The product **3u** is purified with silica gel chromatography (petroleum ether/ethyl acetate = 10/1 as the eluent) as yellow oil (65% yield).  $^1\text{H}$  NMR (400 MHz, Chloroform-*d*)  $\delta$  7.42 – 7.40 (m, 2H), 7.36 – 7.30 (m, 1H), 7.21 – 7.14 (m, 4H), 7.09 (d,  $J$  = 8.1 Hz, 2H), 4.32 – 4.21 (m, 2H), 2.28 (s, 3H), 2.01 (s, 3H), 1.28 (t,  $J$  = 7.1 Hz, 3H).  $^{13}\text{C}$  NMR (101 MHz, Chloroform-*d*)  $\delta$  199.54 (d,  $J$  = 4.4 Hz), 164.05 (t,  $J$  = 32.4 Hz), 138.56, 134.62, 132.88, 130.23, 129.23, 129.18, 128.25, 114.67 (dd,  $J$  = 262.1, 252.5 Hz), 62.68, 61.61 (dd,  $J$  = 22.9, 20.1 Hz), 21.25, 20.40 (dd,  $J$  = 6.0, 3.3 Hz), 13.96.  $^{19}\text{F}$  NMR (376 MHz, Chloroform-*d*)  $\delta$  -106.68 (d,  $J$  = 270.2 Hz, 1F), -111.90 (d,  $J$  = 270.2 Hz, 1F). HRMS (ESI) ( $m/z$ ):  $[\text{M}+\text{H}]^+$  calcd. for  $\text{C}_{20}\text{H}_{21}\text{O}_3\text{F}_2$ : 347.1453, found: 347.1458.

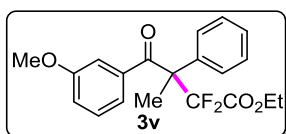

Ethyl (R)-2,2-difluoro-4-(3-methoxyphenyl)-3-methyl-4-oxo-3-phenylbutanoate (**3v**). The product **3v** is purified with silica gel chromatography (petroleum ether/ethyl acetate = 10/1 as the eluent) as yellow oil (77% yield).  $^1\text{H}$  NMR (400 MHz, Chloroform-*d*)  $\delta$  7.48 – 7.33 (m, 5H), 7.14 – 7.10 (m, 2H), 6.97 (d,  $J$  = 7.9 Hz, 2H), 4.41 – 4.30 (m, 2H), 3.66 (s, 3H), 2.13 (s, 3H), 1.37 (t,  $J$  = 7.1 Hz, 3H).  $^{13}\text{C}$  NMR (101 MHz, Chloroform-*d*)  $\delta$  199.13 (d,  $J$  = 4.7 Hz), 163.97 (t,  $J$  = 32.3 Hz), 159.38, 135.96 (dd,  $J$  = 31.0, 1.6 Hz), 129.47, 129.18, 128.70, 128.44, 122.85, 119.63, 114.69 (dd,  $J$  = 264.6, 253.5 Hz), 114.50, 62.73, 62.00 (dd,  $J$  = 22.9, 20.0 Hz), 55.32, 20.45 (dd,  $J$  = 5.8, 3.4 Hz), 13.97.  $^{19}\text{F}$  NMR (376 MHz, Chloroform-*d*)  $\delta$  -106.70 (d,  $J$  = 270.4 Hz, 1F), -111.81 (d,  $J$  = 270.4 Hz, 1F). HRMS (ESI) ( $m/z$ ):  $[\text{M}+\text{H}]^+$  calcd. for  $\text{C}_{20}\text{H}_{21}\text{O}_4\text{F}_2$ : 363.1402, found: 363.1406.

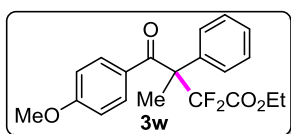

Ethyl (R)-2,2-difluoro-4-(4-methoxyphenyl)-3-methyl-4-oxo-3-phenylbutanoate (**3w**). The product **3w** is purified with silica gel chromatography (petroleum ether/ethyl acetate = 10/1 as the eluent) as yellow oil

(85% yield).  $^1\text{H}$  NMR (400 MHz, Chloroform-*d*)  $\delta$  7.50 (d,  $J = 8.9$  Hz, 2H), 7.45 – 7.29 (m, 5H), 6.72 (d,  $J = 8.9$  Hz, 2H), 4.41 – 4.30 (m, 2H), 3.78 (s, 3H), 2.13 (s, 3H), 1.37 (t,  $J = 7.1$  Hz, 3H).  $^{13}\text{C}$  NMR (101 MHz, Chloroform-*d*)  $\delta$  197.86 (d,  $J = 4.8$  Hz), 164.12 (t,  $J = 32.3$  Hz), 163.25, 136.53 (d,  $J = 2.1$  Hz), 132.82, 129.53, 128.55, 128.31, 126.82, 114.68 (dd,  $J = 262.5, 251.9$  Hz), 113.48, 62.66, 61.89 (dd,  $J = 22.9, 20.0$  Hz), 55.52, 20.75 (dd,  $J = 6.0, 3.3$  Hz), 13.98.  $^{19}\text{F}$  NMR (376 MHz, Chloroform-*d*)  $\delta$  -106.96 (d,  $J = 269.5$  Hz, 1F), -112.27 (d,  $J = 269.5$  Hz, 1F). HRMS (ESI) ( $m/z$ ):  $[\text{M}+\text{H}]^+$  calcd. for  $\text{C}_{20}\text{H}_{21}\text{O}_4\text{F}_2$ : 363.1402, found: 363.1398.

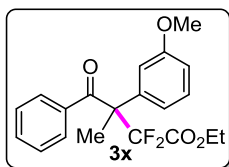

Ethyl (R)-2,2-difluoro-3-(3-methoxyphenyl)-3-methyl-4-oxo-4-phenylbutanoate (**3x**). The product **3x** is purified with silica gel chromatography (petroleum ether/ethyl acetate = 10/1 as the eluent) as yellow oil (76% yield).  $^1\text{H}$  NMR (400 MHz, Chloroform-*d*)  $\delta$  7.51 – 7.49 (m, 2H), 7.45 – 7.39 (m, 1H), 7.30 – 7.23 (m, 3H), 6.98 – 6.91 (m, 3H), 4.41 – 4.29 (m, 2H), 3.77 (s, 3H), 2.10 (s, 3H), 1.36 (t,  $J = 7.1$  Hz, 3H).  $^{13}\text{C}$  NMR (101 MHz, Chloroform-*d*)  $\delta$  199.20 (d,  $J = 4.7$  Hz), 163.94 (t,  $J = 32.3$  Hz), 159.56, 137.39, 134.68, 132.91, 130.17, 129.29, 128.27, 122.10, 115.69, 114.65 (dd,  $J = 263.3, 252.6$  Hz), 113.71, 62.71, 61.83 (dd,  $J = 22.9, 19.8$  Hz), 55.39, 20.47 (dd,  $J = 6.0, 3.3$  Hz), 13.95.  $^{19}\text{F}$  NMR (376 MHz, Chloroform-*d*)  $\delta$  -106.45 (d,  $J = 270.2$  Hz, 1F), -111.73 (d,  $J = 270.2$  Hz, 1F). HRMS (ESI) ( $m/z$ ):  $[\text{M}+\text{H}]^+$  calcd. for  $\text{C}_{20}\text{H}_{21}\text{O}_4\text{F}_2$ : 363.1402, found: 363.1402.

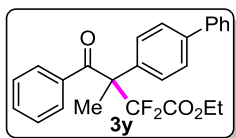

Ethyl (R)-3-([1,1'-biphenyl]-4-yl)-2,2-difluoro-3-methyl-4-oxo-4-phenylbutanoate (**3y**). The product **3y** is purified with silica gel chromatography (petroleum ether/ethyl acetate = 10/1 as the eluent) as yellow oil (76% yield).  $^1\text{H}$  NMR (400 MHz, Chloroform-*d*)  $\delta$  7.64 – 7.51 (m, 4H), 7.49 – 7.44 (m, 2H), 7.41 – 7.35 (m, 5H), 7.32 – 7.27 (m, 1H), 7.21 – 7.17 (m, 2H), 4.35 – 4.23 (m, 2H), 2.08 (s, 3H), 1.30 (t,  $J = 7.1$  Hz, 3H).  $^{13}\text{C}$  NMR (101 MHz, Chloroform-*d*)  $\delta$  199.37 (d,  $J = 4.4$  Hz), 163.99 (t,  $J = 32.3$  Hz), 141.33, 140.17, 134.97, 134.55, 133.02, 130.28, 129.83, 128.96, 128.34, 127.78, 127.18, 127.02, 114.70 (dd,  $J = 262.4, 252.9$  Hz), 62.78, 61.73 (dd,  $J = 22.8, 20.1$  Hz), 20.49 (dd,  $J = 6.0, 3.2$  Hz), 13.99.  $^{19}\text{F}$  NMR (376 MHz, Chloroform-*d*)  $\delta$  -106.57 (d,  $J = 270.4$  Hz, 1F), -111.70 (d,  $J = 270.4$  Hz, 1F). HRMS (ESI) ( $m/z$ ):  $[\text{M}+\text{H}]^+$  calcd. for  $\text{C}_{25}\text{H}_{23}\text{O}_3\text{F}_2$ : 409.1610, found: 409.1606.

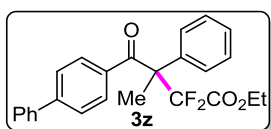

Ethyl (R)-4-([1,1'-biphenyl]-4-yl)-2,2-difluoro-3-methyl-4-oxo-3-phenylbutanoate (**3z**). The product **3z** is purified with silica gel chromatography (petroleum ether/ethyl acetate = 10/1 as the eluent) as yellow oil (65% yield).  $^1\text{H}$  NMR (400 MHz, Chloroform-*d*)  $\delta$  7.61 – 7.57 (m, 2H), 7.55 – 7.53 (m, 2H), 7.51 – 7.47 (m, 2H), 7.45 – 7.35 (m, 8H), 4.44 – 4.32 (m, 2H), 2.19 (s, 3H), 1.39 (t,  $J = 7.1$  Hz, 3H).  $^{13}\text{C}$  NMR (101 MHz, Chloroform-*d*)  $\delta$  198.85 (d,  $J = 4.7$  Hz), 164.02 (t,  $J = 32.3$  Hz), 145.59, 139.67, 136.19, 133.14, 130.93, 129.52, 129.04, 128.70, 128.48, 128.42, 127.28, 126.86, 114.71 (dd,  $J = 262.6,$

252.8 Hz), 62.72, 61.99 (dd,  $J = 22.9, 20.0$  Hz), 20.54 (dd,  $J = 6.0, 3.3$  Hz), 13.98.  $^{19}\text{F}$  NMR (376 MHz, Chloroform-*d*)  $\delta$  -106.64 (d,  $J = 270.3$  Hz, 1F), -111.93 (d,  $J = 270.3$  Hz, 1F). HRMS (ESI) ( $m/z$ ):  $[\text{M}+\text{H}]^+$  calcd. for  $\text{C}_{25}\text{H}_{23}\text{O}_3\text{F}_2$ : 409.1610, found: 409.1607.

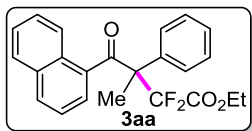

Ethyl (R)-2,2-difluoro-3-methyl-4-(naphthalen-1-yl)-4-oxo-3-phenylbutanoate (**3aa**). The product **3aa** is purified with silica gel chromatography (petroleum ether/ethyl acetate = 10/1 as the eluent) as yellow oil (71% yield).  $^1\text{H}$  NMR (400 MHz, Chloroform-*d*)  $\delta$  8.18 (d,  $J = 8.4$  Hz, 1H), 7.90 – 7.78 (m, 1H), 7.61 – 7.45 (m, 7H), 7.17 – 7.09 (m, 1H), 6.86 (d,  $J = 7.2$  Hz, 1H), 4.46 – 4.32 (m, 2H), 1.94 (s, 3H), 1.37 (t,  $J = 7.0$  Hz, 3H).  $^{13}\text{C}$  NMR (101 MHz, Chloroform-*d*)  $\delta$  203.35 (d,  $J = 3.5$  Hz), 163.89 (t,  $J = 32.4$  Hz), 135.26, 135.12, 134.01, 131.57, 130.93, 129.29, 128.89, 128.60, 128.53, 127.83, 126.58, 125.67, 125.48, 123.85, 115.22 (dd,  $J = 263.3, 255.6$  Hz), 62.97, 62.52 (dd,  $J = 22.1, 19.2$  Hz), 19.21 (dd,  $J = 5.7, 3.5$  Hz), 13.97.  $^{19}\text{F}$  NMR (376 MHz, Chloroform-*d*)  $\delta$  -104.68 (d,  $J = 272.9$  Hz, 1F), -108.53 (d,  $J = 272.9$  Hz, 1F). HRMS (ESI) ( $m/z$ ):  $[\text{M}+\text{H}]^+$  calcd. for  $\text{C}_{23}\text{H}_{21}\text{O}_3\text{F}_2$ : 383.1453, found: 383.1457.

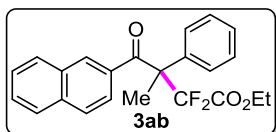

Ethyl (R)-2,2-difluoro-3-methyl-4-(naphthalen-2-yl)-4-oxo-3-phenylbutanoate (**3ab**). The product **3ab** is purified with silica gel chromatography (petroleum ether/ethyl acetate = 10/1 as the eluent) as yellow oil (60% yield).  $^1\text{H}$  NMR (400 MHz, Chloroform-*d*)  $\delta$  8.05 (s, 1H), 7.78 (d,  $J = 8.1$  Hz, 1H), 7.73 – 7.66 (m, 2H), 7.57 – 7.52 (m, 2H), 7.49 – 7.44 (m, 3H), 7.41 – 7.37 (m, 3H), 4.45 – 4.33 (m, 2H), 2.21 (s, 3H), 1.40 (t,  $J = 7.1$  Hz, 3H).  $^{13}\text{C}$  NMR (101 MHz, Chloroform-*d*)  $\delta$  199.28 (d,  $J = 4.7$  Hz), 164.05 (t,  $J = 32.2$  Hz), 136.26 (d,  $J = 2.0$  Hz), 135.25, 132.43, 132.21, 131.82, 129.82, 129.55, 128.85, 128.73, 128.50, 127.92, 127.67, 126.82, 125.59, 114.76 (dd,  $J = 262.7, 252.7$  Hz), 62.74, 62.12 (dd,  $J = 22.9, 20.0$  Hz), 20.59 (dd,  $J = 5.9, 3.4$  Hz), 14.00.  $^{19}\text{F}$  NMR (376 MHz, Chloroform-*d*)  $\delta$  -106.64 (d,  $J = 270.3$  Hz, 1F), -111.93 (d,  $J = 270.3$  Hz, 1F). HRMS (ESI) ( $m/z$ ):  $[\text{M}+\text{H}]^+$  calcd. for  $\text{C}_{23}\text{H}_{21}\text{O}_3\text{F}_2$ : 383.1453, found: 383.1451.

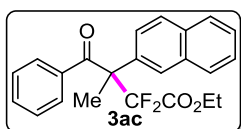

Ethyl (R)-2,2-difluoro-3-methyl-3-(naphthalen-2-yl)-4-oxo-4-phenylbutanoate (**3ac**). The product **3ac** is purified with silica gel chromatography (petroleum ether/ethyl acetate = 10/1 as the eluent) as yellow oil (65% yield).  $^1\text{H}$  NMR (400 MHz, Chloroform-*d*)  $\delta$  7.98 (s, 1H), 7.87 – 7.81 (m, 3H), 7.64 – 7.48 (m, 4H), 7.46 – 7.39 (m, 2H), 7.25 – 7.15 (m, 2H), 4.43 – 4.31 (m, 2H), 2.25 (s, 3H), 1.36 (t,  $J = 7.1$  Hz, 3H).  $^{13}\text{C}$  NMR (101 MHz, Chloroform-*d*)  $\delta$  199.44 (d,  $J = 4.4$  Hz), 164.03 (t,  $J = 32.2$  Hz), 134.67, 133.62 (d,  $J = 2.1$  Hz), 133.15, 133.11, 133.00, 130.24, 128.54, 128.35, 127.89, 127.71, 127.32, 127.30, 126.93, 126.55, 114.85 (dd,  $J = 262.6, 252.8$  Hz), 62.77, 62.07 (dd,  $J = 22.8, 20.0$  Hz), 20.67 (dd,  $J = 6.0, 3.3$  Hz), 13.97.  $^{19}\text{F}$  NMR (376 MHz, Chloroform-*d*)  $\delta$  -106.33 (d,  $J = 277.2$  Hz, 1F), -111.49 (d,  $J = 270.7$  Hz, 1F). HRMS (ESI) ( $m/z$ ):  $[\text{M}+\text{H}]^+$  calcd. for  $\text{C}_{23}\text{H}_{21}\text{O}_3\text{F}_2$ : 383.1453, found: 383.1453.

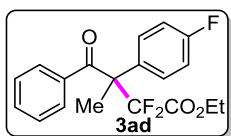

Ethyl (R)-2,2-difluoro-3-(4-fluorophenyl)-3-methyl-4-oxo-4-phenylbutanoate (**3ad**). The product **3ad** is purified with silica gel chromatography (petroleum ether/ethyl acetate = 10/1 as the eluent) as yellow oil (63% yield). <sup>1</sup>H NMR (400 MHz, Chloroform-*d*) δ 7.49 – 7.47 (m, 2H), 7.44 (d, *J* = 7.4 Hz, 1H), 7.39 – 7.36 (m, 2H), 7.29 – 7.25 (m, 2H), 7.12 – 7.03 (m, 2H), 4.42 – 4.31 (m, 2H), 2.11 (s, 3H), 1.38 (t, *J* = 7.1 Hz, 3H). <sup>13</sup>C NMR (101 MHz, Chloroform-*d*) δ 199.09 (d, *J* = 4.4 Hz), 163.87 (t, *J* = 32.3), 162.96 (d, *J* = 249.5), 134.38, 133.12, 131.89, 131.24 (dd, *J* = 8.2, 1.3 Hz), 130.22, 128.40, 115.52 (d, *J* = 21.5 Hz), 114.52 (dd, *J* = 262.3, 253.1 Hz), 62.81, 61.44 (dd, *J* = 22.9, 20.1 Hz), 20.64 (dd, *J* = 6.1, 3.2 Hz), 13.99. <sup>19</sup>F NMR (376 MHz, Chloroform-*d*) δ -106.83 (d, *J* = 271.0 Hz, 1F), -112.03 (d, *J* = 271.0 Hz, 1F), -113.10 (s, 1F). HRMS (ESI) (*m/z*): [M+H]<sup>+</sup> calcd. for C<sub>19</sub>H<sub>18</sub>O<sub>3</sub>F<sub>3</sub>: 351.1203, found: 351.1205.

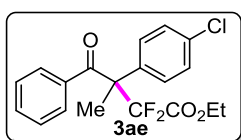

Ethyl (R)-3-(4-chlorophenyl)-2,2-difluoro-3-methyl-4-oxo-4-phenylbutanoate (**3ae**). The product **3ae** is purified with silica gel chromatography (petroleum ether/ethyl acetate = 10/1 as the eluent) as yellow oil (70% yield). <sup>1</sup>H NMR (400 MHz, Chloroform-*d*) δ 7.50 – 7.43 (m, 3H), 7.37 – 7.23 (m, 6H), 4.42 – 4.30 (m, 2H), 2.11 (s, 3H), 1.37 (t, *J* = 7.1 Hz, 3H). <sup>13</sup>C NMR (101 MHz, Chloroform-*d*) δ 198.91 (d, *J* = 4.4 Hz), 163.78 (t, *J* = 32.1 Hz), 134.97, 134.68 (d, *J* = 2.1 Hz), 134.23 (d, *J* = 2.1 Hz), 133.19, 130.81, 130.21, 128.69, 128.42, 114.44 (dd, *J* = 262.4, 253.4 Hz), 62.84, 61.54 (dd, *J* = 22.9, 20.0 Hz), 20.51 (dd, *J* = 6.0, 3.2 Hz), 13.97. <sup>19</sup>F NMR (376 MHz, Chloroform-*d*) δ -106.70 (d, *J* = 271.3 Hz, 1F), -111.83 (d, *J* = 271.2 Hz, 1F). HRMS (ESI) (*m/z*): [M+H]<sup>+</sup> calcd. for C<sub>19</sub>H<sub>18</sub>O<sub>3</sub>ClF<sub>2</sub>: 367.0907, found: 367.0907.

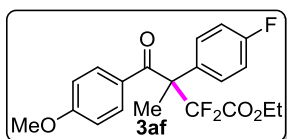

Ethyl (R)-2,2-difluoro-3-(4-fluorophenyl)-4-(4-methoxyphenyl)-3-methyl-4-oxobutanoate (**3af**). The product **3af** is purified with silica gel chromatography (petroleum ether/ethyl acetate = 10/1 as the eluent) as yellow oil (74% yield). <sup>1</sup>H NMR (400 MHz, Chloroform-*d*) δ 7.50 (d, *J* = 8.8 Hz, 2H), 7.37 – 7.34 (m, 2H), 7.11 – 7.00 (m, 2H), 6.74 (d, *J* = 8.9 Hz, 2H), 4.42 – 4.31 (m, 2H), 3.79 (s, 3H), 2.13 (s, 3H), 1.38 (t, *J* = 7.1 Hz, 3H). <sup>13</sup>C NMR (101 MHz, Chloroform-*d*) δ 197.55 (d, *J* = 4.8 Hz), 164.01 (t, *J* = 32.3 Hz), 163.42, 162.86 (d, *J* = 249.5 Hz), 132.81, 132.42, 131.32 (d, *J* = 8.0 Hz), 126.65, 115.48, 115.27, 114.50 (dd, *J* = 212.1, 254.5 Hz), 113.61, 62.73, 61.43 (dd, *J* = 22.9, 20.0 Hz), 55.57, 20.94 (dd, *J* = 6.0, 3.2 Hz), 14.00. <sup>19</sup>F NMR (376 MHz, Chloroform-*d*) δ -107.08 (d, *J* = 270.1 Hz, 1F), -112.37 (d, *J* = 270.0 Hz, 1F), -113.36 (s, 1F). HRMS (ESI) (*m/z*): [M+H]<sup>+</sup> calcd. for C<sub>20</sub>H<sub>20</sub>O<sub>4</sub>F<sub>3</sub>: 381.1308, found: 381.1306.

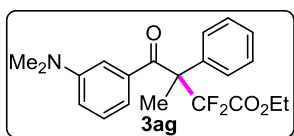

Ethyl (R)-4-(3-(dimethylamino)phenyl)-2,2-difluoro-3-methyl-4-oxo-3-phenylbutanoate (**3ag**). The product **3ag** is purified with silica gel chromatography (petroleum ether/ethyl acetate = 10/1 as the eluent)

as yellow oil (71% yield).  $^1\text{H}$  NMR (400 MHz, Chloroform-*d*)  $\delta$  7.41 – 7.36 (m, 5H), 7.10 – 7.02 (m, 1H), 6.90 (s, 1H), 6.78 – 6.72 (m, 2H), 4.36 (q,  $J$  = 7.0 Hz, 2H), 2.79 (s, 6H), 2.13 (s, 3H), 1.37 (t,  $J$  = 7.1 Hz, 3H).  $^{13}\text{C}$  NMR (101 MHz, Chloroform-*d*)  $\delta$  200.02 (d,  $J$  = 4.4 Hz), 164.07 (t,  $J$  = 32.3 Hz), 150.16, 136.53, 135.13, 129.52, 128.76, 128.51, 128.30, 118.40, 116.70, 114.80 (dd,  $J$  = 262.1, 252.5 Hz), 114.02, 62.66, 62.10 (dd,  $J$  = 22.8, 19.9 Hz), 40.36, 20.53 (dd,  $J$  = 6.0, 3.4 Hz), 13.98.  $^{19}\text{F}$  NMR (376 MHz, Chloroform-*d*)  $\delta$  -106.77 (d,  $J$  = 269.9 Hz, 1F), -111.85 (d,  $J$  = 269.9 Hz, 1F). HRMS (ESI) ( $m/z$ ):  $[\text{M}+\text{H}]^+$  calcd. for  $\text{C}_{21}\text{H}_{24}\text{O}_3\text{NF}_2$ : 376.1719, found: 376.1720.

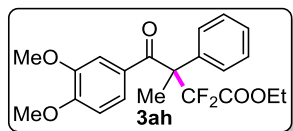

Ethyl (R)-4-(3,4-dimethoxyphenyl)-2,2-difluoro-3-methyl-4-oxo-3-phenylbutanoate (**3ah**). The product **3ah** is purified with silica gel chromatography (petroleum ether/ethyl acetate = 10/1 as the eluent) as yellow oil (65% yield).  $^1\text{H}$  NMR (400 MHz, Chloroform-*d*)  $\delta$  7.39 – 7.37 (m, 5H), 7.19 (s, 1H), 7.03 (d,  $J$  = 8.5 Hz, 1H), 6.63 (d,  $J$  = 8.6 Hz, 1H), 4.42 – 4.30 (m, 2H), 3.84 (s, 3H), 3.68 (s, 3H), 2.16 (s, 3H), 1.37 (t,  $J$  = 7.1 Hz, 3H).  $^{13}\text{C}$  NMR (101 MHz, Chloroform-*d*)  $\delta$  197.80 (d,  $J$  = 4.8 Hz), 164.09 (t,  $J$  = 32.2 Hz), 153.01, 148.41, 136.75, 129.57, 128.54, 128.29, 126.74 (d,  $J$  = 1.7 Hz), 125.32, 114.68 (dd,  $J$  = 262.6, 252.0 Hz), 112.78, 109.79, 62.66, 61.94 (dd,  $J$  = 23.0, 20.1 Hz), 56.07, 55.77, 20.90 (dd,  $J$  = 5.8, 3.4 Hz), 13.98.  $^{19}\text{F}$  NMR (376 MHz, Chloroform-*d*)  $\delta$  -107.09 (d,  $J$  = 269.4 Hz, 1F), -112.26 (d,  $J$  = 269.4 Hz, 1F). HRMS (ESI) ( $m/z$ ):  $[\text{M}+\text{H}]^+$  calcd. for  $\text{C}_{21}\text{H}_{22}\text{O}_5\text{F}_2\text{Na}$ : 415.1328, found: 415.1324.

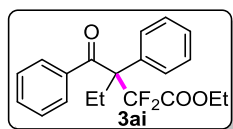

Ethyl (R)-3-benzoyl-2,2-difluoro-3-phenylpentanoate (**3ai**). The product **3ai** is purified with silica gel chromatography (petroleum ether/ethyl acetate = 10/1 as the eluent) as yellow oil (40% yield).  $^1\text{H}$  NMR (400 MHz, Chloroform-*d*)  $\delta$  7.44 (d,  $J$  = 7.9 Hz, 2H), 7.37 – 7.27 (m, 6H), 7.19 – 7.15 (m, 2H), 4.19 – 4.06 (m, 2H), 2.87 (dq,  $J$  = 14.8, 7.5 Hz, 1H), 2.37 (dq,  $J$  = 14.5, 6.9, 6.4 Hz, 1H), 1.15 (t,  $J$  = 7.1 Hz, 3H), 0.88 (t,  $J$  = 7.4 Hz, 3H).  $^{13}\text{C}$  NMR (101 MHz, Chloroform-*d*)  $\delta$  197.93, 163.66 (t,  $J$  = 32.1 Hz), 137.03 (t,  $J$  = 2.6 Hz), 136.26, 132.77, 129.88, 129.79, 128.50, 128.25, 128.15, 116.40 (dd,  $J$  = 264.8, 258.7 Hz), 64.97 (t,  $J$  = 20.2 Hz), 62.72, 27.86 (t,  $J$  = 2.6 Hz), 13.83, 10.56 (dd,  $J$  = 5.4, 2.1 Hz).  $^{19}\text{F}$  NMR (376 MHz, Chloroform-*d*)  $\delta$  -105.83 (d,  $J$  = 262.3 Hz, 1F), -108.36 (d,  $J$  = 262.3 Hz, 1F). HRMS (ESI) ( $m/z$ ):  $[\text{M}+\text{H}]^+$  calcd. for  $\text{C}_{20}\text{H}_{20}\text{O}_3\text{F}_2\text{Na}$ : 369.1273, found: 369.1282.

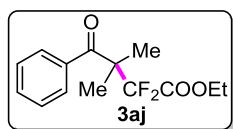

Ethyl 2,2-difluoro-3,3-dimethyl-4-oxo-4-phenylbutanoate (**3aj**). The product **3aj** is purified with silica gel chromatography (petroleum ether/ethyl acetate = 10/1 as the eluent) as yellow oil (41% yield).  $^1\text{H}$  NMR (400 MHz, Chloroform-*d*)  $\delta$  7.70 (d,  $J$  = 8.3 Hz, 2H), 7.54 – 7.48 (m, 1H), 7.47 – 7.39 (m, 2H), 4.35 (q,  $J$  = 7.1 Hz, 2H), 1.62 (s, 6H), 1.36 (td,  $J$  = 7.1, 1.1 Hz, 3H).  $^{13}\text{C}$  NMR (101 MHz, Chloroform-*d*)  $\delta$  203.63, 163.73 (t,  $J$  = 32.3 Hz), 137.61, 131.87, 128.40, 128.14, 116.28 (t,  $J$  = 257.2 Hz), 62.88, 54.87 (t,  $J$  = 21.8 Hz), 21.28 (t,  $J$  = 4.5 Hz), 14.01.  $^{19}\text{F}$  NMR (376 MHz, Chloroform-*d*)  $\delta$  -111.40.  $[\text{M}+\text{H}]^+$  calcd. for  $\text{C}_{14}\text{H}_{16}\text{F}_2\text{NaO}_3$ : 293.0965, found: 293.0956.

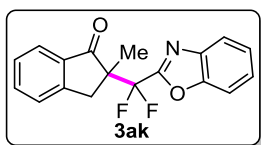

(S)-2-(benzo[d]oxazol-2-yl)difluoromethyl-2-methyl-2,3-dihydro-1H-inden-1-one (**3ak**). The product **3ak** is purified with silica gel chromatography (petroleum ether/ethyl acetate = 10/1 as the eluent) as yellow oil (57% yield).  $^1\text{H}$  NMR (400 MHz, Chloroform-*d*)  $\delta$  7.79 (d,  $J = 7.7$  Hz, 1H), 7.74 (d,  $J = 7.4$  Hz, 1H), 7.63 – 7.57 (m, 2H), 7.49 – 7.33 (m, 4H), 3.83 (d,  $J = 17.6$  Hz, 1H), 3.07 (d,  $J = 17.6$  Hz, 1H), 1.64 (s, 3H).  $^{13}\text{C}$  NMR (101 MHz, Chloroform-*d*)  $\delta$  202.43 (t,  $J = 2.2$  Hz), 156.64 (t,  $J = 33.9$  Hz), 151.56, 150.51, 139.98, 135.58, 135.36, 128.02, 126.88, 126.59, 125.30, 124.94, 121.43, 117.14 (t,  $J = 249.5$  Hz), 111.50, 55.00 (t,  $J = 22.6$  Hz), 37.47 (t,  $J = 2.8$  Hz), 19.33 (t,  $J = 4.5$  Hz).  $^{19}\text{F}$  NMR (376 MHz, Chloroform-*d*)  $\delta$  -102.04 (d,  $J = 277.0$  Hz, 1F), -105.22 (d,  $J = 277.1$  Hz, 1F). HRMS (ESI) ( $m/z$ ):  $[\text{M}+\text{H}]^+$  calcd. for  $\text{C}_{18}\text{H}_{14}\text{F}_2\text{NO}_2$ : 314.0987, found: 314.1005.

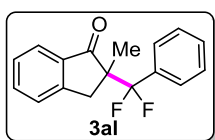

(S)-2-(difluoro(phenyl)methyl)-2-methyl-2,3-dihydro-1H-inden-1-one (**3al**). The product **3al** is purified with silica gel chromatography (petroleum ether/ethyl acetate = 10/1 as the eluent) as yellow oil (60% yield).  $^1\text{H}$  NMR (400 MHz, Chloroform-*d*)  $\delta$  7.71 (d,  $J = 7.7$  Hz, 1H), 7.59 – 7.52 (m, 1H), 7.46 – 7.30 (m, 7H), 3.67 (d,  $J = 17.7$  Hz, 1H), 2.91 (d,  $J = 17.7$  Hz, 1H), 1.45 (s, 3H).  $^{13}\text{C}$  NMR (101 MHz, Chloroform-*d*)  $\delta$  203.81 (t,  $J = 2.9$  Hz), 151.77, 135.91 (t,  $J = 2.0$  Hz), 135.34, 134.40 (t,  $J = 26.9$  Hz), 129.99, 127.87, 127.76, 126.82 (t,  $J = 6.7$  Hz), 126.31, 124.56, 122.59 (dd,  $J = 251.6, 249.7$  Hz), 56.06 (t,  $J = 26.2$  Hz), 37.37 (t,  $J = 3.1$  Hz), 19.78 (t,  $J = 4.5$  Hz).  $^{19}\text{F}$  NMR (376 MHz, Chloroform-*d*)  $\delta$  -98.28 (d,  $J = 249.5$  Hz, 1F), -101.63 (d,  $J = 249.5$  Hz, 1F). HRMS (ESI) ( $m/z$ ):  $[\text{M}+\text{Na}]^+$  calcd. for  $\text{C}_{17}\text{H}_{14}\text{F}_2\text{ONa}$ : 295.0905, found: 295.0923.

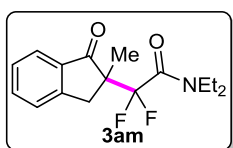

(S)-N,N-diethyl-2,2-difluoro-2-(2-methyl-1-oxo-2,3-dihydro-1H-inden-2-yl)acetamide (**3am**). The product **3am** is purified with silica gel chromatography (petroleum ether/ethyl acetate = 10/1 as the eluent) as yellow oil (53% yield).  $^1\text{H}$  NMR (400 MHz, Chloroform-*d*)  $\delta$  7.81 (d,  $J = 7.6$  Hz, 1H), 7.60 – 7.52 (m, 1H), 7.45 – 7.33 (m, 2H), 3.65 – 3.47 (m, 2H), 3.42 (d,  $J = 16.9$  Hz, 1H), 3.30 – 3.21 (m, 2H), 2.89 (d,  $J = 16.9$  Hz, 1H), 1.40 (s, 3H), 1.22 (t,  $J = 7.0$  Hz, 3H), 1.05 (t,  $J = 7.1$  Hz, 3H).  $^{13}\text{C}$  NMR (101 MHz, Chloroform-*d*)  $\delta$  203.26 (d,  $J = 6.2$  Hz), 161.44 (t,  $J = 29.6$  Hz), 150.53, 135.83 (dd,  $J = 4.9, 1.1$  Hz), 134.55, 127.64, 126.57, 124.70, 120.77 (dd,  $J = 266.8, 261.4$  Hz), 53.65 (dd,  $J = 21.5, 19.6$  Hz), 41.55 (t,  $J = 6.4$  Hz), 41.24, 38.97 (dd,  $J = 4.2, 2.2$  Hz), 18.88 (dd,  $J = 8.2, 3.5$  Hz), 14.30, 12.38.  $^{19}\text{F}$  NMR (376 MHz, Chloroform-*d*)  $\delta$  -100.84 (d,  $J = 292.3$  Hz, 1F), -103.17 (d,  $J = 292.3$  Hz, 1F). HRMS (ESI) ( $m/z$ ):  $[\text{M}+\text{H}]^+$  calcd. for  $\text{C}_{16}\text{H}_{20}\text{NO}_2\text{F}_2$ : 296.1457, found: 296.1467.

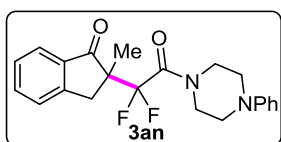

(S)-2-(1,1-difluoro-2-oxo-2-(4-phenylpiperazin-1-yl)ethyl)-2-methyl-2,3-dihydro-1H-inden-1-one (**3an**). The product **3an** is purified with silica gel chromatography (petroleum ether/ethyl acetate = 10/1 as the eluent) as yellow oil (50% yield). <sup>1</sup>H NMR (400 MHz, Chloroform-*d*) δ 7.83 (d, *J* = 7.6 Hz, 1H), 7.62 – 7.55 (m, 1H), 7.46 – 7.36 (m, 2H), 7.32 – 7.23 (m, 2H), 6.95 – 6.88 (m, 3H), 3.96 – 3.87 (m, 2H), 3.73 – 3.64 (m, 2H), 3.44 (d, *J* = 17.1 Hz, 1H), 3.30 – 3.07 (m, 4H), 2.92 (d, *J* = 17.0 Hz, 1H), 1.43 (s, 3H). <sup>13</sup>C NMR (101 MHz, Chloroform-*d*) δ 203.21 (d, *J* = 6.2 Hz), 160.67 (t, *J* = 30.0 Hz), 150.82, 150.47, 135.77 (d, *J* = 5.1 Hz), 134.72, 129.37, 127.74, 126.61, 124.73, 120.83, 120.70 (dd, *J* = 266.7, 261.0 Hz), 116.83, 53.52 (dd, *J* = 21.0, 19.3 Hz), 49.85, 49.40, 45.67 (t, *J* = 6.3 Hz), 43.14, 38.84 (dd, *J* = 4.1, 2.1 Hz), 18.82 (dd, *J* = 8.2, 3.3 Hz). <sup>19</sup>F NMR (376 MHz, Chloroform-*d*) δ -100.05 (d, *J* = 294.3 Hz, 1F), -102.16 (d, *J* = 294.3 Hz, 1F). HRMS (ESI) (*m/z*): [M+Na]<sup>+</sup> calcd. for C<sub>22</sub>H<sub>22</sub>N<sub>2</sub>O<sub>2</sub>F<sub>2</sub>Na: 407.1542, found: 407.1545.

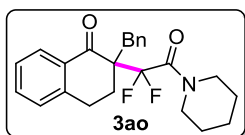

(R)-2-benzyl-2-(1,1-difluoro-2-oxo-2-(piperidin-1-yl)ethyl)-3,4-dihydronaphthalen-1(2H)-one (**3ao**). The product **3ao** is purified with silica gel chromatography (petroleum ether/ethyl acetate = 10/1 as the eluent) as yellow oil (80% yield). <sup>1</sup>H NMR (400 MHz, Chloroform-*d*) δ 8.02 (d, *J* = 7.8 Hz, 1H), 7.40 – 7.32 (m, 1H), 7.26 – 7.11 (m, 6H), 7.07 (d, *J* = 7.6 Hz, 1H), 3.64 – 3.42 (m, 3H), 3.31 – 3.27 (m, 1H), 3.16 (s, 2H), 2.80 – 2.76 (m, 2H), 2.45 (td, *J* = 12.8, 6.4 Hz, 1H), 2.08 (d, *J* = 14.1 Hz, 1H), 1.55 – 1.42 (m, 6H). <sup>13</sup>C NMR (101 MHz, Chloroform-*d*) δ 196.07 (d, *J* = 6.2 Hz), 160.57 (t, *J* = 29.4 Hz), 141.57, 136.29, 133.23, 132.79 (d, *J* = 3.6 Hz), 130.89, 128.44, 128.18, 127.87, 126.91 (d, *J* = 6.7 Hz), 121.38 (dd, *J* = 273.5, 262.6 Hz), 54.81 (dd, *J* = 19.9, 15.4 Hz), 46.93 (t, *J* = 7.0 Hz), 44.70, 36.65, 36.56, 26.58, 26.15 (d, *J* = 6.2 Hz), 25.70, 25.09, 24.50. <sup>19</sup>F NMR (376 MHz, Chloroform-*d*) δ -95.09 (d, *J* = 288.8 Hz, 1F), -100.86 (d, *J* = 288.8 Hz, 1F). HRMS (ESI) (*m/z*): [M+H]<sup>+</sup> calcd. for C<sub>24</sub>H<sub>26</sub>O<sub>2</sub>F<sub>2</sub>N: 398.1926, found: 398.1931.

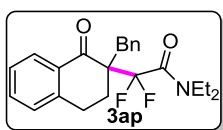

(R)-2-(2-benzyl-1-oxo-1,2,3,4-tetrahydronaphthalen-2-yl)-N,N-diethyl-2,2-difluoroacetamide (**3ap**). The product **3ap** is purified with silica gel chromatography (petroleum ether/ethyl acetate = 10/1 as the eluent) as yellow oil (78% yield). <sup>1</sup>H NMR (400 MHz, Chloroform-*d*) δ 8.09 (d, *J* = 7.8 Hz, 1H), 7.46 – 7.39 (m, 1H), 7.32 – 7.20 (m, 6H), 7.14 (d, *J* = 7.6 Hz, 1H), 3.61 (dq, *J* = 14.0, 7.1 Hz, 1H), 3.42 (ddt, *J* = 28.0, 14.0, 7.0 Hz, 2H), 3.28 – 3.13 (m, 3H), 2.94 – 2.80 (m, 2H), 2.63 – 2.55 (m, 1H), 2.15 (d, *J* = 14.2 Hz, 1H), 1.22 (t, *J* = 7.0 Hz, 3H), 1.05 (t, *J* = 7.1 Hz, 3H). <sup>13</sup>C NMR (101 MHz, Chloroform-*d*) δ 196.16 (d, *J* = 5.9 Hz), 161.67 (t, *J* = 29.6 Hz), 141.75, 136.26, 133.28, 132.65 (d, *J* = 3.3 Hz), 130.89, 128.46, 128.16, 127.85, 126.93, 126.85, 121.09 (dd, *J* = 273.2, 262.1 Hz), 54.96 (dd, *J* = 20.1, 15.7 Hz), 41.75 (t, *J* = 6.7 Hz), 41.47, 36.60 (d, *J* = 8.3 Hz), 26.17 (d, *J* = 5.0 Hz), 25.11, 14.39, 12.37. <sup>19</sup>F NMR (376 MHz, Chloroform-*d*) δ -95.57 (d, *J* = 287.3 Hz, 1F), -101.59 (d, *J* = 287.3 Hz, 1F). HRMS (ESI) (*m/z*): [M+H]<sup>+</sup> calcd. for C<sub>23</sub>H<sub>26</sub>O<sub>2</sub>F<sub>2</sub>N: 386.1926, found: 386.1931.

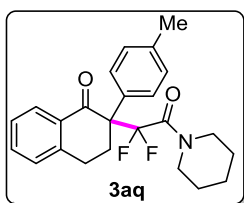

(R)-2-(1,1-difluoro-2-oxo-2-(piperidin-1-yl)ethyl)-2-(p-tolyl)-3,4-dihydronaphthalen-1(2H)-one (**3aq**). The product **3aq** is purified with silica gel chromatography (petroleum ether/ethyl acetate = 10/1 as the eluent) as yellow oil (75% yield).  $^1\text{H}$  NMR (400 MHz, Chloroform-*d*)  $\delta$  8.15 (d,  $J = 7.8$  Hz, 1H), 7.32 – 7.17 (m, 4H), 7.06 (d,  $J = 7.8$  Hz, 2H), 6.98 (d,  $J = 7.6$  Hz, 1H), 3.49 (d,  $J = 38.6$  Hz, 4H), 3.16 (td,  $J = 14.2, 5.9$  Hz, 1H), 2.73 – 2.62 (m, 3H), 2.22 (s, 3H), 1.55 – 1.48 (m, 6H).  $^{13}\text{C}$  NMR (101 MHz, Chloroform-*d*)  $\delta$  194.50 (dd,  $J = 6.8, 1.6$  Hz), 160.89 (t,  $J = 29.4$  Hz), 142.50, 138.04, 133.43, 132.27 (d,  $J = 4.0$  Hz), 129.52, 129.24, 128.63 (d,  $J = 4.8$  Hz), 128.44, 128.37, 126.71, 118.85 (dd,  $J = 272.1, 257.5$  Hz), 59.35 (dd,  $J = 21.4, 17.1$  Hz), 47.00 (dd,  $J = 8.5, 5.6$  Hz), 44.69, 28.88 (dd,  $J = 6.1, 1.7$  Hz), 26.51, 25.77, 25.47, 24.55, 21.04.  $^{19}\text{F}$  NMR (376 MHz, Chloroform-*d*)  $\delta$  -91.09 (d,  $J = 293.0$  Hz, 1F), -104.98 (d,  $J = 293.0$  Hz, 1F). HRMS (ESI) ( $m/z$ ):  $[\text{M}+\text{Na}]^+$  calcd. for  $\text{C}_{24}\text{H}_{25}\text{O}_2\text{F}_2\text{NNa}$ : 420.1746, found: 420.1746.

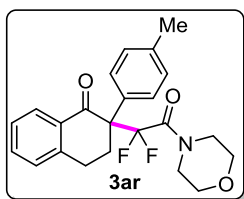

(R)-2-(1,1-difluoro-2-morpholino-2-oxoethyl)-2-(p-tolyl)-3,4-dihydronaphthalen-1(2H)-one (**3ar**). The product **3ar** is purified with silica gel chromatography (petroleum ether/ethyl acetate = 10/1 as the eluent) as yellow oil (75% yield).  $^1\text{H}$  NMR (400 MHz, Chloroform-*d*)  $\delta$  8.22 (d,  $J = 7.8$  Hz, 1H), 7.44 – 7.37 (m, 1H), 7.32 – 7.26 (m, 3H), 7.15 (d,  $J = 7.9$  Hz, 2H), 7.08 (d,  $J = 7.6$  Hz, 1H), 3.78 – 3.62 (m, 8H), 3.22 (td,  $J = 14.0, 5.5$  Hz, 1H), 2.84 – 2.72 (m, 3H), 2.31 (s, 3H).  $^{13}\text{C}$  NMR (101 MHz, Chloroform-*d*)  $\delta$  194.63 (dd,  $J = 6.7, 1.4$  Hz), 161.28 (t,  $J = 29.9$  Hz), 142.55, 138.22, 133.62, 132.09 (d,  $J = 3.9$  Hz), 129.43, 129.30, 128.51, 128.32, 128.23 (d,  $J = 4.8$  Hz), 126.78, 118.53 (dd,  $J = 270.8, 256.5$  Hz), 66.79, 59.34 (dd,  $J = 21.2, 17.1$  Hz), 46.72 (dd,  $J = 8.2, 5.2$  Hz), 43.58, 28.75 (dd,  $J = 6.1, 1.8$  Hz), 25.42, 21.05.  $^{19}\text{F}$  NMR (376 MHz, Chloroform-*d*)  $\delta$  -91.36 (d,  $J = 293.9$  Hz, 1F), -104.98 (d,  $J = 293.8$  Hz, 1F). HRMS (ESI) ( $m/z$ ):  $[\text{M}+\text{Na}]^+$  calcd. for  $\text{C}_{23}\text{H}_{23}\text{O}_3\text{F}_2\text{NNa}$ : 422.1538, found: 422.1539.

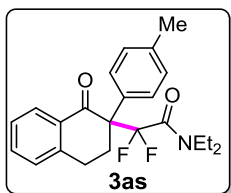

(R)-N,N-diethyl-2,2-difluoro-2-(1-oxo-2-(p-tolyl)-1,2,3,4-tetrahydronaphthalen-2-yl)acetamide (**3as**). The product **3as** is purified with silica gel chromatography (petroleum ether/ethyl acetate = 10/1 as the eluent) as yellow oil (81% yield).  $^1\text{H}$  NMR (400 MHz, Chloroform-*d*)  $\delta$  8.13 (d,  $J = 7.9$  Hz, 1H), 7.34 – 7.27 (m, 1H), 7.25 – 7.17 (m, 3H), 7.07 (d,  $J = 8.0$  Hz, 2H), 6.99 (d,  $J = 7.6$  Hz, 1H), 3.58 – 3.10 (m, 5H), 2.74 – 2.59 (m, 3H), 2.23 (s, 3H), 1.11 (t,  $J = 7.0$  Hz, 3H), 1.05 (t,  $J = 7.1$  Hz, 3H).  $^{13}\text{C}$  NMR (101 MHz, Chloroform-*d*)  $\delta$  194.78 (dd,  $J = 6.7, 1.5$  Hz), 162.17 (t,  $J = 29.5$  Hz), 142.64, 138.05, 133.48, 132.30 (d,  $J = 3.8$  Hz), 129.46, 129.29, 128.95 (d,  $J = 5.1$  Hz), 128.48, 128.31, 126.74, 118.69 (dd,  $J = 272.0, 256.6$  Hz).



Hz), 59.68 (dd,  $J = 21.6, 17.7$  Hz), 41.93 (dd,  $J = 8.4, 5.1$  Hz), 41.80, 29.15 (dd,  $J = 6.3, 1.4$  Hz), 25.56, 21.07, 14.36, 12.40.  $^{19}\text{F}$  NMR (376 MHz, Chloroform-*d*)  $\delta$  -91.80 (d,  $J = 290.5$  Hz, 1F), -105.58 (d,  $J = 290.4$  Hz, 1F). HRMS (ESI) ( $m/z$ ):  $[\text{M}+\text{Na}]^+$  calcd. for  $\text{C}_{23}\text{H}_{25}\text{O}_2\text{F}_2\text{NNa}$ : 408.1746, found: 408.1756.

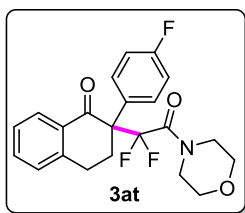

(*R*)-2-(1,1-difluoro-2-morpholino-2-oxoethyl)-2-(4-fluorophenyl)-3,4-dihydronaphthalen-1(2H)-one (**3at**). The product **3at** is purified with silica gel chromatography (petroleum ether/ethyl acetate = 10/1 as the eluent) as yellow oil (83% yield).  $^1\text{H}$  NMR (400 MHz, Chloroform-*d*)  $\delta$  8.21 (d,  $J = 7.9$  Hz, 1H), 7.45 – 7.38 (m, 3H), 7.35 – 7.28 (m, 1H), 7.10 (d,  $J = 7.6$  Hz, 1H), 7.07 – 6.98 (m, 2H), 3.78 – 3.61 (m, 8H), 3.26 – 3.18 (m, 1H), 2.86 – 2.67 (m, 3H).  $^{13}\text{C}$  NMR (101 MHz, Chloroform-*d*)  $\delta$  194.43 (dd,  $J = 6.6, 1.4$  Hz), 162.74 (d,  $J = 248.3$  Hz), 161.14 (t,  $J = 29.7$  Hz), 142.41, 133.88, 131.99 (d,  $J = 4.0$  Hz), 131.40 (d,  $J = 8.1$  Hz), 128.51 (d,  $J = 14.0$  Hz), 127.22 (dd,  $J = 4.0, 4.0$  Hz), 126.98, 118.50 (dd,  $J = 271.5, 256.9$  Hz), 115.65, 115.44, 66.82, 59.16 (dd,  $J = 21.2, 17.0$  Hz), 46.76 (dd,  $J = 8.2, 5.2$  Hz), 43.65, 28.97 (dd,  $J = 6.1, 1.7$  Hz), 25.32.  $^{19}\text{F}$  NMR (376 MHz, Chloroform-*d*)  $\delta$  -91.38 (d,  $J = 294.4$  Hz, 1F), -104.88 (d,  $J = 294.3$  Hz, 1F), -113.83 (s, 1F). HRMS (ESI) ( $m/z$ ):  $[\text{M}+\text{Na}]^+$  calcd. for  $\text{C}_{22}\text{H}_{20}\text{O}_3\text{F}_3\text{NNa}$ : 426.1287, found: 426.1293.

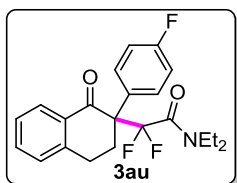

(*R*)-*N,N*-diethyl-2,2-difluoro-2-(2-(4-fluorophenyl)-1-oxo-1,2,3,4-tetrahydronaphthalen-2-yl)acetamide (**3au**). The product **3au** is purified with silica gel chromatography (petroleum ether/ethyl acetate = 10/1 as the eluent) as yellow oil (83% yield).  $^1\text{H}$  NMR (400 MHz, Chloroform-*d*)  $\delta$  8.21 (d,  $J = 7.8$  Hz, 1H), 7.58 – 7.36 (m, 3H), 7.35 – 7.27 (m, 1H), 7.09 (d,  $J = 7.6$  Hz, 1H), 7.07 – 6.95 (m, 2H), 3.65 – 3.19 (m, 5H), 2.84 – 2.65 (m, 3H), 1.20 (t,  $J = 6.9$  Hz, 3H), 1.13 (t,  $J = 7.0$  Hz, 3H).  $^{13}\text{C}$  NMR (101 MHz, Chloroform-*d*)  $\delta$  194.55 (dd,  $J = 6.6, 1.6$  Hz), 162.64 (d,  $J = 248.5$  Hz), 161.93 (t,  $J = 29.4$  Hz), 142.44, 133.71, 132.11 (d,  $J = 4.0$  Hz), 131.41, 131.33, 128.52, 128.38, 127.82 (dd,  $J = 5.1, 3.1$  Hz), 126.90, 118.61 (dd,  $J = 272.5, 257.0$  Hz), 115.57, 115.36, 59.40 (dd,  $J = 21.7, 17.4$  Hz), 41.93 (dd,  $J = 8.3, 5.2$  Hz), 41.80, 29.30 (dd,  $J = 4.0, 2.1$  Hz), 25.40, 14.35, 12.38.  $^{19}\text{F}$  NMR (376 MHz, Chloroform-*d*)  $\delta$  -91.79 (d,  $J = 291.2$  Hz, 1F), -105.45 (d,  $J = 291.1$  Hz, 1F), -114.13 (s, 1F). HRMS (ESI) ( $m/z$ ):  $[\text{M}+\text{Na}]^+$  calcd. for  $\text{C}_{22}\text{H}_{22}\text{O}_2\text{F}_3\text{NNa}$ : 412.1495, found: 412.1497.

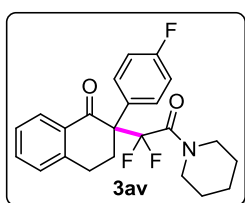

(*R*)-2-(1,1-difluoro-2-oxo-2-(piperidin-1-yl)ethyl)-2-(4-fluorophenyl)-3,4-dihydronaphthalen-1(2H)-one (**3av**). The product **3av** is purified with silica gel chromatography (petroleum ether/ethyl acetate = 10/1 as the eluent) as yellow oil (77% yield).  $^1\text{H}$  NMR (400 MHz, Chloroform-*d*)  $\delta$  8.22 (d,  $J = 7.8$  Hz, 1H),

7.43 – 7.40 (m, 3H), 7.35 – 7.28 (m, 1H), 7.09 (d,  $J = 7.6$  Hz, 1H), 7.07 – 6.97 (m, 2H), 3.53 – 3.36 (m, 4H), 3.29 – 3.21 (m, 1H), 2.85 – 2.65 (m, 3H), 1.76 – 1.44 (m, 6H).  $^{13}\text{C}$  NMR (101 MHz, Chloroform-*d*)  $\delta$  194.37 (dd,  $J = 6.8, 1.7$  Hz), 162.70 (d,  $J = 248.0$  Hz), 160.73 (t,  $J = 29.2$  Hz), 142.37, 133.72, 132.15 (d,  $J = 3.9$  Hz), 131.49 (d,  $J = 8.0$  Hz), 128.52, 127.57 (dd,  $J = 5.1, 4.0$  Hz), 126.93, 118.83 (dd,  $J = 272.7, 257.6$  Hz), 115.48 (d,  $J = 21.3$  Hz), 59.14 (dd,  $J = 21.4, 17.1$  Hz), 47.06 (dd,  $J = 8.4, 5.7$  Hz), 44.77, 29.10 (dd,  $J = 6.1, 1.9$  Hz), 26.57, 25.80, 25.38, 24.58.  $^{19}\text{F}$  NMR (376 MHz, Chloroform-*d*)  $\delta$  -91.15 (d,  $J = 293.3$  Hz, 1F), -104.86 (d,  $J = 293.2$  Hz, 1F), -114.18 (s, 1F). HRMS (ESI) ( $m/z$ ):  $[\text{M}+\text{Na}]^+$  calcd. for  $\text{C}_{23}\text{H}_{22}\text{O}_2\text{F}_3\text{NNa}$ : 424.1495, found: 424.1497.

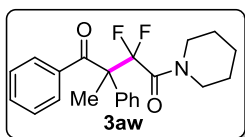

2,2-difluoro-3-methyl-3,4-diphenyl-1-(piperidin-1-yl)butane-1,4-dione (**3aw**). The product **3aw** is purified with silica gel chromatography (petroleum ether/ethyl acetate = 10/1 as the eluent) as yellow oil (65% yield).  $^1\text{H}$  NMR (400 MHz, Chloroform-*d*)  $\delta$  7.55 – 7.49 (m, 2H), 7.45 – 7.33 (m, 6H), 7.27 – 7.20 (m, 2H), 3.67 – 3.48 (m, 4H), 2.05 (s, 3H), 1.73 – 1.48 (m, 6H).  $^{13}\text{C}$  NMR (101 MHz, Chloroform-*d*)  $\delta$  200.26 (dd,  $J = 5.1, 2.1$  Hz), 160.89 (t,  $J = 29.0$  Hz), 137.76 (d,  $J = 3.5$  Hz), 136.13 (d,  $J = 3.1$  Hz), 131.45, 129.40, 128.95, 128.49, 128.36, 127.99, 118.54 (dd,  $J = 272.1, 257.8$  Hz), 60.38 (dd,  $J = 21.4, 17.2$  Hz), 47.06 (dd,  $J = 8.9, 5.6$  Hz), 44.78, 26.55, 25.80, 24.60, 21.41 (dd,  $J = 6.0, 3.1$  Hz).  $^{19}\text{F}$  NMR (376 MHz, Chloroform-*d*)  $\delta$  -96.42 (d,  $J = 285.6$  Hz, 1F), -104.50 (d,  $J = 285.7$  Hz, 1F). HRMS (ESI) ( $m/z$ ):  $[\text{M}+\text{H}]^+$  calcd. for  $\text{C}_{22}\text{H}_{24}\text{O}_2\text{F}_2\text{N}$ : 372.1770, found: 372.1774.

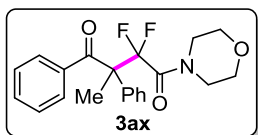

2,2-difluoro-3-methyl-1-morpholino-3,4-diphenylbutane-1,4-dione (**3ax**). The product **3ax** is purified with silica gel chromatography (petroleum ether/ethyl acetate = 10/1 as the eluent) as yellow oil (65% yield).  $^1\text{H}$  NMR (400 MHz, Chloroform-*d*)  $\delta$  7.53 – 7.46 (m, 2H), 7.45 – 7.33 (m, 6H), 7.29 – 7.22 (m, 2H), 3.82 – 3.58 (m, 8H), 2.06 (s, 3H).  $^{13}\text{C}$  NMR (101 MHz, Chloroform-*d*)  $\delta$  199.97 (dd,  $J = 5.1, 1.1$  Hz), 161.37 (t,  $J = 29.4$  Hz), 137.18 (d,  $J = 3.5$  Hz), 135.82 (d,  $J = 4.1$  Hz), 131.79, 129.42, 129.14, 128.57, 128.55, 128.09, 118.24 (dd,  $J = 271.1, 256.6$  Hz), 66.87, 60.49 (dd,  $J = 21.4, 17.1$  Hz), 46.85 (dd,  $J = 9.0, 5.1$  Hz), 43.69, 21.17 (dd,  $J = 5.8, 3.2$  Hz).  $^{19}\text{F}$  NMR (376 MHz, Chloroform-*d*)  $\delta$  -95.48 (d,  $J = 287.4$  Hz, 1F), -103.97 (d,  $J = 287.4$  Hz, 1F). HRMS (ESI) ( $m/z$ ):  $[\text{M}+\text{H}]^+$  calcd. for  $\text{C}_{21}\text{H}_{22}\text{O}_3\text{F}_2\text{N}$ : 374.1562, found: 374.1567.

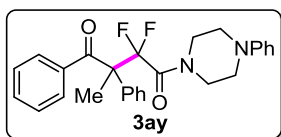

2,2-difluoro-3-methyl-3,4-diphenyl-1-(4-phenylpiperazin-1-yl)butane-1,4-dione (**3ay**). The product **3ay** is purified with silica gel chromatography (petroleum ether/ethyl acetate = 10/1 as the eluent) as yellow oil (60% yield).  $^1\text{H}$  NMR (400 MHz, Chloroform-*d*)  $\delta$  7.56 – 7.19 (m, 12H), 6.98 – 6.83 (m, 3H), 3.94 – 3.69 (m, 4H), 3.37 – 3.03 (m, 4H), 2.07 (s, 3H).  $^{13}\text{C}$  NMR (101 MHz, Chloroform-*d*)  $\delta$  200.02 (d,  $J = 4.7$  Hz), 161.30 (t,  $J = 29.5$  Hz), 150.93, 137.28 (d,  $J = 2.1$  Hz), 135.90 (d,  $J = 3.1$  Hz), 131.76, 129.44, 129.34, 129.14, 128.59, 128.54, 128.09, 120.63, 118.31 (dd,  $J = 271.3, 256.8$  Hz), 116.70, 60.50 (dd,  $J = 21.4,$

17.1 Hz), 49.82, 49.38, 45.97 (dd,  $J = 9.1, 4.9$  Hz), 43.37, 21.24 (dd,  $J = 5.8, 3.1$  Hz).  $^{19}\text{F}$  NMR (376 MHz, Chloroform-*d*)  $\delta$  -95.09 (d,  $J = 287.1$  Hz, 1F), -103.68 (d,  $J = 287.1$  Hz, 1F). HRMS (ESI) ( $m/z$ ):  $[\text{M}+\text{Na}]^+$  calcd. for  $\text{C}_{27}\text{H}_{26}\text{N}_2\text{O}_2\text{F}_2\text{Na}$ : 471.1855, found: 471.1855.

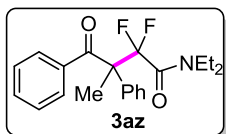

N,N-diethyl-2,2-difluoro-3-methyl-4-oxo-3,4-diphenylbutanamide (**3az**). The product **3az** is purified with silica gel chromatography (petroleum ether/ethyl acetate = 10/1 as the eluent) as yellow oil (60% yield).  $^1\text{H}$  NMR (400 MHz, Chloroform-*d*)  $\delta$  7.46 – 7.39 (m, 2H), 7.38 – 7.24 (m, 6H), 7.20 – 7.11 (m, 2H), 3.48 (ddt,  $J = 14.1, 7.0, 3.7$  Hz, 1H), 3.42 – 3.29 (m, 2H), 3.24 (dq,  $J = 14.0, 7.1$  Hz, 1H), 1.98 (s, 3H), 1.16 – 1.07 (m, 6H).  $^{13}\text{C}$  NMR (101 MHz, Chloroform-*d*)  $\delta$  200.35 (d,  $J = 5.1$  Hz), 162.13 (t,  $J = 29.2$  Hz), 137.64 (d,  $J = 3.3$  Hz), 136.38 (d,  $J = 3.7$  Hz), 131.53, 129.38, 129.04, 128.51, 128.36, 127.99, 118.35 (dd,  $J = 272.0, 257.2$  Hz), 60.73 (dd,  $J = 21.7, 17.6$  Hz), 42.05 (dd,  $J = 9.1, 5.1$  Hz), 41.96, 21.62 (dd,  $J = 6.0, 3.0$  Hz), 14.39, 12.44.  $^{19}\text{F}$  NMR (376 MHz, Chloroform-*d*)  $\delta$  -96.17 (d,  $J = 283.7$  Hz, 1F), -104.81 (d,  $J = 283.6$  Hz, 1F). HRMS (ESI) ( $m/z$ ):  $[\text{M}+\text{Na}]^+$  calcd. for  $\text{C}_{21}\text{H}_{23}\text{O}_2\text{F}_2\text{NNa}$ : 382.1589, found: 382.1593.

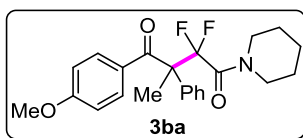

2,2-difluoro-4-(4-methoxyphenyl)-3-methyl-3-phenyl-1-(piperidin-1-yl)butane-1,4-dione (**3ba**). The product **3ba** is purified with silica gel chromatography (petroleum ether/ethyl acetate = 10/1 as the eluent) as yellow oil (88% yield).  $^1\text{H}$  NMR (400 MHz, Chloroform-*d*)  $\delta$  7.52 – 7.44 (m, 2H), 7.42 – 7.36 (m, 5H), 6.72 (d,  $J = 8.6$  Hz, 2H), 3.77 (s, 3H), 3.71 – 3.42 (m, 4H), 2.11 (s, 3H), 1.64 (m, 6H).  $^{13}\text{C}$  NMR (101 MHz, Chloroform-*d*)  $\delta$  198.08 (d,  $J = 5.2$  Hz), 162.35, 161.17 (t,  $J = 29.0$  Hz), 136.94 (d,  $J = 2.7$  Hz), 131.83, 129.51, 129.43 (d,  $J = 3.4$  Hz), 128.38, 128.26, 118.42 (dd,  $J = 271.6, 256.8$  Hz), 113.23, 60.69 (dd,  $J = 21.4, 17.5$  Hz), 55.42, 47.14 (dd,  $J = 9.8, 5.4$  Hz), 44.83, 26.59, 25.85, 24.67, 21.67 (dd,  $J = 5.8, 3.3$  Hz).  $^{19}\text{F}$  NMR (376 MHz, Chloroform-*d*)  $\delta$  -95.74 (d,  $J = 285.7$  Hz, 1F), -104.48 (d,  $J = 285.7$  Hz, 1F). HRMS (ESI) ( $m/z$ ):  $[\text{M}+\text{Na}]^+$  calcd. for  $\text{C}_{23}\text{H}_{25}\text{O}_3\text{F}_2\text{NNa}$ : 424.1695, found: 424.1700.

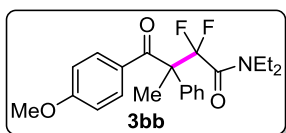

N,N-diethyl-2,2-difluoro-4-(4-methoxyphenyl)-3-methyl-4-oxo-3-phenylbutanamide (**3bb**). The product **3bb** is purified with silica gel chromatography (petroleum ether/ethyl acetate = 10/1 as the eluent) as yellow oil (85% yield).  $^1\text{H}$  NMR (400 MHz, Chloroform-*d*)  $\delta$  7.51 – 7.43 (m, 2H), 7.42 – 7.26 (m, 5H), 6.72 (d,  $J = 8.5$  Hz, 2H), 3.77 (s, 3H), 3.63 – 3.26 (m, 4H), 2.12 (s, 3H), 1.22 - 1.15 (m, 6H).  $^{13}\text{C}$  NMR (101 MHz, Chloroform-*d*)  $\delta$  198.26 (d,  $J = 5.2$  Hz), 162.44 (t,  $J = 29.1$  Hz), 162.39, 137.17 (d,  $J = 3.6$  Hz), 131.87, 129.48, 129.35 (d,  $J = 3.2$  Hz), 128.39, 128.25, 118.20 (dd,  $J = 271.4, 256.2$  Hz), 113.23, 61.05 (dd,  $J = 21.8, 18.0$  Hz), 55.42, 42.16 (dd,  $J = 10.1, 5.1$  Hz), 42.09, 21.89 (dd,  $J = 6.0, 3.1$  Hz), 14.45, 12.45.  $^{19}\text{F}$  NMR (376 MHz, Chloroform-*d*)  $\delta$  -96.72 (d,  $J = 282.3$  Hz, 1F), -105.34 (d,  $J = 282.3$  Hz, 1F). HRMS (ESI) ( $m/z$ ):  $[\text{M}+\text{Na}]^+$  calcd. for  $\text{C}_{22}\text{H}_{25}\text{O}_3\text{F}_2\text{NNa}$ : 412.1695, found: 412.1700.

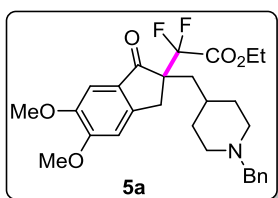

Ethyl (S)-2-(2-((1-benzylpiperidin-4-yl)methyl)-5,6-dimethoxy-1-oxo-2,3-dihydro-1H-inden-2-yl)-2,2-difluoroacetate (**5a**). The product **5a** is purified with silica gel chromatography (petroleum ether/ethyl acetate = 1/1 as the eluent) as white solid (73% yield).  $^1\text{H}$  NMR (400 MHz, Chloroform-*d*)  $\delta$  7.34 – 7.18 (m, 5H), 7.15 (s, 1H), 6.86 (s, 1H), 4.19 (q,  $J = 7.1$  Hz, 2H), 3.98 (s, 3H), 3.90 (s, 3H), 3.53 – 3.34 (m, 3H), 3.04 (d,  $J = 17.8$  Hz, 1H), 2.72 (dd,  $J = 23.2, 11.3$  Hz, 2H), 2.08 (dt,  $J = 17.6, 8.8$  Hz, 1H), 1.94 – 1.67 (m, 4H), 1.50 (d,  $J = 12.5$  Hz, 1H), 1.37 (t,  $J = 11.1$  Hz, 2H), 1.28 – 1.15 (m, 4H).  $^{13}\text{C}$  NMR (101 MHz, Chloroform-*d*)  $\delta$  200.72 (t,  $J = 2.7$  Hz), 162.98 (t,  $J = 32.8$  Hz), 156.15, 149.89, 147.76, 138.35, 129.31, 128.22, 127.03, 116.22 (t,  $J = 259.2$  Hz), 107.12, 104.61, 63.39, 63.12, 57.75 (t,  $J = 20.5$  Hz), 56.44, 56.24, 53.68, 53.60, 37.34, 34.11, 33.60 (t,  $J = 3.2$  Hz), 33.50, 32.22, 13.88.  $^{19}\text{F}$  NMR (376 MHz, Chloroform-*d*)  $\delta$  -109.11 (d,  $J = 257.5$  Hz, 1F), -110.24 (d,  $J = 257.4$  Hz, 1F). HRMS (ESI) ( $m/z$ ):  $[\text{M}+\text{H}]^+$  calcd. for  $\text{C}_{28}\text{H}_{34}\text{F}_2\text{NO}_5$ : 502.2400, found: 502.2419.

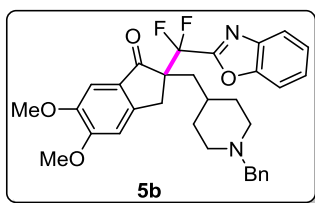

(S)-2-(benzo[d]oxazol-2-yl)-2-((1-benzylpiperidin-4-yl)methyl)-5,6-dimethoxy-2,3-dihydro-1H-inden-1-one (**5b**). The product **5b** is purified with silica gel chromatography (petroleum ether/ethyl acetate = 1/1 as the eluent) as white solid (50% yield).  $^1\text{H}$  NMR (400 MHz, Chloroform-*d*)  $\delta$  7.68 (d,  $J = 7.7$  Hz, 1H), 7.49 (d,  $J = 7.9$  Hz, 1H), 7.31 (dt,  $J = 15.8, 7.4$  Hz, 2H), 7.16 (m, 5H), 7.06 (s, 1H), 6.77 (s, 1H), 3.87 (s, 3H), 3.80 (s, 3H), 3.60 (d,  $J = 17.7$  Hz, 1H), 3.31 (s, 2H), 3.08 (d,  $J = 17.8$  Hz, 1H), 2.64 (dd,  $J = 27.6, 11.7$  Hz, 2H), 2.19 (dd,  $J = 14.1, 6.3$  Hz, 1H), 1.93 (dd,  $J = 14.2, 3.4$  Hz, 1H), 1.69 (dt,  $J = 43.1, 12.0$  Hz, 2H), 1.43 (d,  $J = 12.4$  Hz, 1H), 1.38 – 1.06 (m, 4H).  $^{13}\text{C}$  NMR (101 MHz, Chloroform-*d*)  $\delta$  200.50, 156.80 (t,  $J = 34.1$  Hz), 156.12, 150.42, 149.79, 147.87, 140.01, 138.30, 129.46, 129.26, 128.19, 127.01, 126.77, 125.26, 121.32, 117.44 (t,  $J = 251.5$  Hz), 111.43, 107.08, 104.67, 63.30, 58.86 (t,  $J = 21.5$  Hz), 56.37, 56.17, 53.64, 53.56, 37.56, 34.00, 33.95, 33.44, 32.24;  $^{19}\text{F}$  NMR (376 MHz, Chloroform-*d*)  $\delta$  -101.79 (d,  $J = 272.1$  Hz, 1F), -105.06 (d,  $J = 272.2$  Hz, 1F). HRMS (ESI) ( $m/z$ ):  $[\text{M}+\text{H}]^+$  calcd. for  $\text{C}_{32}\text{H}_{33}\text{F}_2\text{N}_2\text{O}_4$ : 547.2408, found: 547.2411.

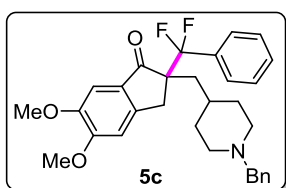

(S)-2-((1-benzylpiperidin-4-yl)methyl)-2-(difluoro(phenyl)methyl)-5,6-dimethoxy-2,3-dihydro-1H-inden-1-one (**5c**). The product **5c** is purified with silica gel chromatography (petroleum ether/ethyl acetate = 1/1 as the eluent) as white solid (61% yield).  $^1\text{H}$  NMR (400 MHz, Chloroform-*d*)  $\delta$  7.45 – 7.16 (m, 10H), 7.06 (s, 1H), 6.74 (s, 1H), 3.92 (s, 3H), 3.87 (s, 3H), 3.43 (d,  $J = 17.8$  Hz, 1H), 3.38 (s, 2H), 3.02 (d,  $J = 17.8$  Hz, 1H), 2.82 – 2.56 (m, 2H), 2.10 (dd,  $J = 14.0, 6.5$  Hz, 1H), 1.97 – 1.85 (m, 2H), 1.79 (td,

$J = 11.5, 2.8$  Hz, 1H), 1.68 (td,  $J = 11.2, 2.8$  Hz, 1H), 1.47 (dt,  $J = 13.2, 2.8$  Hz, 1H), 1.29 – 1.13 (m, 3H).  $^{13}\text{C}$  NMR (101 MHz, Chloroform-*d*)  $\delta$  202.12 (dd,  $J = 3.4, 2.1$  Hz), 155.84, 149.61, 147.90, 138.43, 134.68, 134.41, 134.14, 130.11, 129.94, 129.28, 128.18, 127.72, 126.98, 126.91, 126.84, 122.76 (dd,  $J = 253.5, 251.6$  Hz), 106.86, 104.41, 63.36, 59.85 (t,  $J = 24.5$  Hz), 56.32, 56.15, 53.71, 53.64, 37.99, 34.20, 33.77, 33.46, 32.41.  $^{19}\text{F}$  NMR (376 MHz, Chloroform-*d*)  $\delta$  -97.98 (d,  $J = 246.8$  Hz, 1F), -100.21 (d,  $J = 246.8$  Hz, 1F). HRMS (ESI) ( $m/z$ ):  $[\text{M}+\text{H}]^+$  calcd. for  $\text{C}_{31}\text{H}_{34}\text{F}_2\text{NO}_3$ : 506.2507, found: 506.2500.

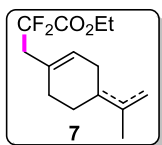

Ethyl 2,2-difluoro-3-(4-(propan-2-ylidene)cyclohex-1-en-1-yl)propanoate and Ethyl 2,2-difluoro-3-(4-(prop-1-en-2-yl)cyclohex-1-en-1-yl)propanoate (**7**). The product **7** is purified with silica gel chromatography (petroleum ether/ethyl acetate = 20/1 as the eluent) as yellow oil (12% yield).  $^1\text{H}$  NMR (400 MHz, Chloroform-*d*)  $\delta$  5.60 (d,  $J = 14.2$  Hz, 1.69H), 4.74 – 4.65 (m, 2H), 4.37 – 4.23 (m, 3.27H), 2.79 – 2.62 (m, 4.72H), 2.29 (t,  $J = 6.2$  Hz, 1.32H), 2.11 (dd,  $J = 16.8, 4.9$  Hz, 5.60H), 1.95 (d,  $J = 11.7$  Hz, 1.05H), 1.80 (ddq,  $J = 12.6, 5.2, 2.5$  Hz, 1.14H), 1.72 (s, 2.97H), 1.67 (s, 1.84H), 1.63 (s, 1.88H), 1.52 – 1.39 (m, 1.22H), 1.35 (s, 0.79H), 1.33 (d,  $J = 1.4$  Hz, 1.87H), 1.32 (d,  $J = 1.4$  Hz, 1.60H), 1.30 (s, 0.74H).  $^{13}\text{C}$  NMR (101 MHz, Chloroform-*d*)  $\delta$  164.32 (td,  $J = 32.8, 4.7$  Hz), 149.63, 128.78 (t,  $J = 4.0$  Hz), 128.55, 128.44, 128.37 (t,  $J = 4.1$  Hz), 126.41, 122.58, 118.75, 116.24, 113.73, 108.88, 62.78, 42.84 (td,  $J = 23.1, 6.8$  Hz), 40.58, 31.00, 30.39, 29.83, 29.61, 27.79, 26.63, 20.89, 20.29, 19.88, 14.17, 14.10.  $^{19}\text{F}$  NMR (376 MHz, Chloroform-*d*)  $\delta$  -103.12, -103.24, -103.34. HRMS (ESI) ( $m/z$ ):  $[\text{M}+\text{H}]^+$  calcd. for  $\text{C}_{14}\text{H}_{21}\text{F}_2\text{O}_2$ : 259.1510, found: 259.1506.

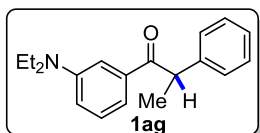

(*S*)-1-(3-(diethylamino)phenyl)-2-phenylpropan-1-one (**1ag**). The product **1ag** was purified with silica gel chromatography (petroleum ether/ethyl acetate = 10/1 as the eluent) as yellow oil (63% yield).  $^1\text{H}$  NMR (400 MHz, Chloroform-*d*)  $\delta$  7.38 – 7.14 (m, 8H), 6.83 (dd,  $J = 8.1, 2.1$  Hz, 1H), 4.68 (q,  $J = 6.9$  Hz, 1H), 2.93 (s, 6H), 1.52 (d,  $J = 6.9$  Hz, 3H).  $^{13}\text{C}$  NMR (101 MHz, Chloroform-*d*)  $\delta$  201.13, 150.62, 141.99, 137.31, 129.12, 129.03, 127.86, 126.88, 117.22, 116.87, 112.36, 48.10, 40.62, 19.72. HRMS (ESI) ( $m/z$ ):  $[\text{M}+\text{H}]^+$  calcd. for  $\text{C}_{17}\text{H}_{20}\text{NO}$ : 254.1545, found: 254.1535.

### General Procedure for Cobalt-Catalyzed Difluoroalkylation of Secondary Aryl Ketones.

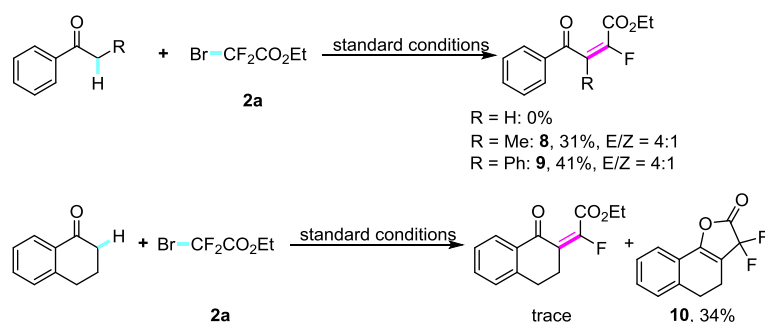

To a 50 mL of Schlenk tube was added secondary aryl ketone (1.0 equiv, 0.2 mmol),  $\text{CoBr}_2$  (10 mol %, 0.02 mmol) and dppBz (10 mol %, 0.02 mmol) under air, followed by Zn (0.5 equiv, 0.1 mmol). The

mixture was evacuated and backfilled with N<sub>2</sub> (3 times). THF (2 mL) was added then followed by LDA (105 mol%, 0.21 mmol) subsequently. The Schlenk tube was then sealed with a Teflon lined cap and put into a cooled bath (-10°C). After stirring for 5 minutes, boron difluoroacetate **2a** (3.0 equiv, 0.6 mmol) was added to the reaction mixture, and the Schlenk tube was then resealed with a Teflon lined cap and put back into the cooled bath (-10°C). After stirring for another 12 hours, the reaction mixture was diluted with ethyl acetate (5 mL). The solvent was removed under reduced pressure, and the residue was purified by flash column chromatography on silica gel to give the desired product.

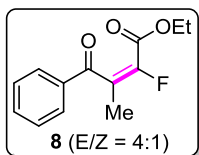

Ethyl 2-fluoro-3-methyl-4-oxo-4-phenylbut-2-enoate (**8**). The product **8** was purified with silica gel chromatography (petroleum ether/ethyl acetate = 10/1 as the eluent) as yellow oil (31% yield, E/Z = 4:1). The definite stereo-structure of the product was deduced from the previous report.<sup>12</sup> (E)-<sup>1</sup>H NMR (400 MHz, Chloroform-*d*)  $\delta$  7.90 (d,  $J$  = 7.8 Hz, 2H), 7.69 – 7.56 (m, 1H), 7.55 – 7.41 (m, 2H), 4.07 (q,  $J$  = 7.1 Hz, 2H), 2.11 (d,  $J$  = 3.4 Hz, 3H), 1.02 (t,  $J$  = 7.1 Hz, 3H). (E)-<sup>19</sup>F NMR (376 MHz, Chloroform-*d*)  $\delta$  -127.29. (E)-<sup>13</sup>C NMR (101 MHz, Chloroform-*d*)  $\delta$  193.71 (d,  $J$  = 6.2 Hz), 159.68 (d,  $J$  = 35.5 Hz), 146.18, 143.56, 135.15 (d,  $J$  = 3.7 Hz), 133.96, 129.03, 128.99, 62.21, 14.69 (d,  $J$  = 5.7 Hz), 13.70. HRMS (ESI) (m/z): [M+Na]<sup>+</sup> calcd. for C<sub>13</sub>H<sub>13</sub>FO<sub>3</sub>Na: 259.0746, found: 259.0744.

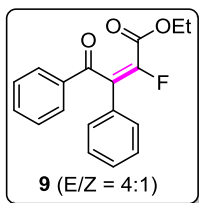

Ethyl 2-fluoro-4-oxo-3,4-diphenylbut-2-enoate (**9**). The product **9** was purified with silica gel chromatography (petroleum ether/ethyl acetate = 10/1 as the eluent) as yellow oil (41% yield, E/Z = 4:1). <sup>1</sup>H NMR (400 MHz, Chloroform-*d*)  $\delta$  8.11 – 7.92 (m, 2H), 7.65 – 7.31 (m, 8H), 4.27 – 4.04 (m, 2H), 1.19 – 1.03 (m, 3H). <sup>19</sup>F NMR (376 MHz, Chloroform-*d*)  $\delta$  -116.84, -126.46. <sup>13</sup>C NMR (101 MHz, Chloroform-*d*)  $\delta$  191.80 (d,  $J$  = 3.6 Hz), 191.42 (d,  $J$  = 5.3 Hz), 160.45 (d,  $J$  = 34.8 Hz), 160.03 (d,  $J$  = 36.4 Hz), 145.99, 145.57, 143.41, 142.85, 136.26 (d,  $J$  = 3.8 Hz), 134.97, 134.51, 133.83, 131.47 (d,  $J$  = 6.0 Hz), 130.97 (d,  $J$  = 5.6 Hz), 130.41 (d,  $J$  = 1.5 Hz), 130.16 – 129.90 (m), 129.79, 129.33, 129.09, 129.06, 129.05, 128.99, 128.95, 128.69 (d,  $J$  = 3.0 Hz), 128.48, 62.53, 62.15, 13.79, 13.76. HRMS (ESI) (m/z): [M+Na]<sup>+</sup> calcd. for C<sub>18</sub>H<sub>15</sub>FO<sub>3</sub>Na: 321.0903, found: 321.0894.

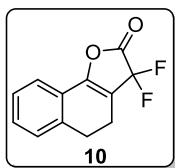

3,3-difluoro-4,5-dihydronaphtho[1,2-b]furan-2(3H)-one (**10**). The product **10** was purified with silica gel chromatography (petroleum ether/ethyl acetate = 10/1 as the eluent) as yellow oil (34% yield). <sup>1</sup>H NMR (400 MHz, Chloroform-*d*)  $\delta$  8.05 – 7.90 (m, 1H), 7.54 – 7.45 (m, 1H), 7.41 – 7.33 (m, 1H), 7.26 – 7.21 (m, 1H), 2.97 – 2.85 (m, 2H), 2.85 – 2.74 (m, 2H). <sup>19</sup>F NMR (376 MHz, Chloroform-*d*)  $\delta$  -58.07. <sup>13</sup>C NMR (101 MHz, Chloroform-*d*)  $\delta$  180.21, 141.55, 133.57, 129.69, 127.96, 127.33, 126.47, 113.29,

102.29, 27.80, 21.70 (t,  $J = 4.0$  Hz). HRMS EI (m/z):  $[M]^+$  calcd. for  $C_{12}H_8F_2O_2$ : 222.0492, found: 222.0486.

## Mechanistic Studies

### 1. Radical clock experiment:

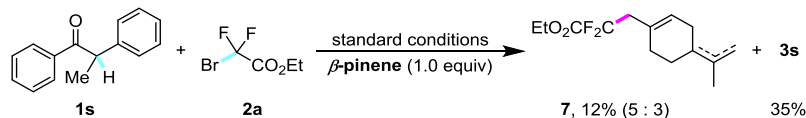

To a 50 mL of Schlenk tube was added ketone **1s** (1.0 equiv, 0.2 mmol),  $CoBr_2$  (10 mol %, 0.02 mmol), Zn (50 mol%, 0.1 mmol) and dppBz (10 mol %, 0.02 mmol) under air. The mixture was evacuated and backfilled with  $N_2$  (3 times). THF (2 mL) was added then followed by LDA (105 mol%, 0.21 mmol) subsequently. The Schlenk tube was then sealed with a Teflon lined cap and put into a cooled bath ( $-10$  °C). After stirring for 5 minutes, bromodifluoroacetate **2a** (3.0 equiv, 0.6 mmol) and  $\beta$ -pinene (1.0 equiv, 0.2 mmol), were added to the reaction mixture, and the Schlenk tube was then resealed with a Teflon lined cap and put back into the cooled bath ( $-10$  °C). After stirring for another 12 hours, the reaction mixture was diluted with ethyl acetate (5 mL). The solvent was removed under reduced pressure, and the residue was purified by flash column chromatography on silica gel to give the desired product of **7** in 12% yield (5 : 3 isomer ratio).

### 2. Procedure of difluoroalkylation with Co(I) used as the catalyst:

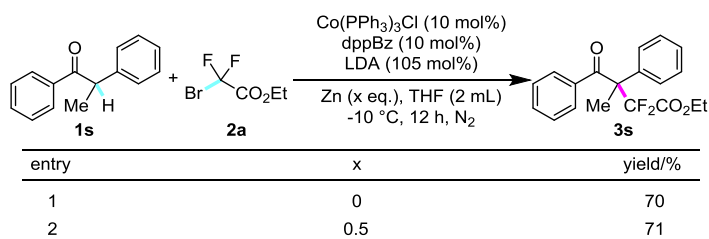

To a 50 mL of Schlenk tube was added ketone **1s** (1.0 equiv, 0.2 mmol),  $Co(PPh_3)_3Cl$  (10 mol%, 0.02 mmol) and dppBz (10 mol %, 0.02 mmol) under air, then was added with Zn (entry 1) or not (entry 2). THF (2 mL) was added then followed by LDA (105 mol%, 0.21 mmol) subsequently. The Schlenk tube was then sealed with a Teflon lined cap and put into a cooled bath ( $-10$  °C). After stirring for 5 minutes, bromodifluoroacetate **2a** (3.0 equiv, 0.6 mmol) was added to the reaction mixture, and the Schlenk tube was then resealed with a Teflon lined cap and put back into the cooled bath ( $-10$  °C). After stirring for another 12 hours, the reaction mixture was diluted with ethyl acetate (5 mL). The solvent was removed under reduced pressure, and the residue was purified by flash column chromatography on silica gel to give the desired product of **3s**.

### 3. Control experiments for the generation of difluoroalkyl radical:

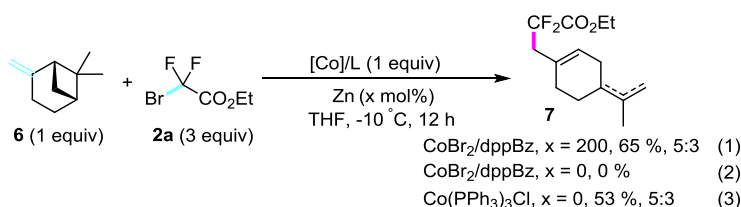

To a 50 mL of Schlenk tube was added **6** (1.0 equiv, 0.2 mmol), CoBr<sub>2</sub> (1.0 equiv, 0.2 mmol) and dppBz (1.0 equiv, 0.2 mmol) under air, then was added with Zn (Eq. 1). THF (2 mL) was added subsequently. The Schlenk tube was then sealed with a Teflon lined cap and put into a cooled bath (- 10 °C). After stirring for 12 hours, the reaction mixture was diluted with ethyl acetate (5 mL). The solvent was removed under reduced pressure, and the residue was purified by flash column chromatography on silica gel to give the desired product of **7**. To a 50 mL of Schlenk tube was added **6** (1.0 equiv, 0.2 mmol), CoBr<sub>2</sub> (1.0 equiv, 0.2 mmol) and dppBz (1.0 equiv, 0.2 mmol) under air (Eq. 2). THF (2 mL) was added subsequently. The Schlenk tube was then sealed with a Teflon lined cap and put into a cooled bath (- 10 °C). After stirring for 12 hours, the reaction mixture was diluted with ethyl acetate (5 mL). The solvent was removed under reduced pressure, and the residue was purified by flash column chromatography on silica gel not to give the desired product of **7**. To a 50 mL of Schlenk tube was added **6** (1.0 equiv, 0.2 mmol), CoCl(PPh<sub>3</sub>)<sub>3</sub> (1.0 equiv, 0.2 mmol) and dppBz (1.0 equiv, 0.2 mmol) under air (Eq. 3). THF (2 mL) was added subsequently. The Schlenk tube was then sealed with a Teflon lined cap and put into a cooled bath (- 10 °C). After stirring for 12 hours, the reaction mixture was diluted with ethyl acetate (5 mL). The solvent was removed under reduced pressure, and the residue was purified by flash column chromatography on silica gel to give the desired product of **7**.

#### 4. The Operation of an Initial Transmetalation:

To a 50 mL of Schlenk tube was added Co(PPh<sub>3</sub>)<sub>3</sub>Cl (1.0 equiv, 0.2 mmol) and dppBz (1.0 equiv, 0.2 mmol) under air, then was added by **1a** (1.0 equiv, 0.2 mmol). THF (2 mL) was added then followed by LDA (105 mol%, 0.21 mmol) subsequently. The Schlenk tube was then sealed with a Teflon lined cap and put into a cooled bath (- 10 °C). After stirring for 5 minutes, borndifluoroacetate **2a** (3.0 equiv, 0.6 mmol) was added to the reaction mixture, and the Schlenk tube was then resealed with a Teflon lined cap and put back into the cooled bath (- 10 °C). After stirring for another 10 minutes, the reaction mixture was diluted with ethyl acetate (5 mL). The solvent was removed under reduced pressure, and the residue was purified by flash column chromatography on silica gel to give the desired product of **3a**. To another 50 mL of Schlenk tube was added Co(PPh<sub>3</sub>)<sub>3</sub>Cl (1.0 equiv, 0.2 mmol) and dppBz (1.0 equiv, 0.2 mmol) under air, then was added by borndifluoroacetate **2a** (3.0 equiv, 0.6 mmol) and THF (2 mL). The Schlenk tube was then sealed with a Teflon lined cap and put into a cooled bath (- 10 °C). After stirring for 5 minutes, **1a** (1.0 equiv, 0.2 mmol) and LDA (105 mol%, 0.21 mmol) were added to the reaction mixture, and the Schlenk tube was then resealed with a Teflon lined cap and put back into the cooled bath (- 10 °C). After stirring for another 10 minutes, the reaction mixture was diluted with ethyl acetate (5 mL). The solvent was removed under reduced pressure, and the residue was purified by flash column chromatography on silica gel to give the desired product of **3a**.

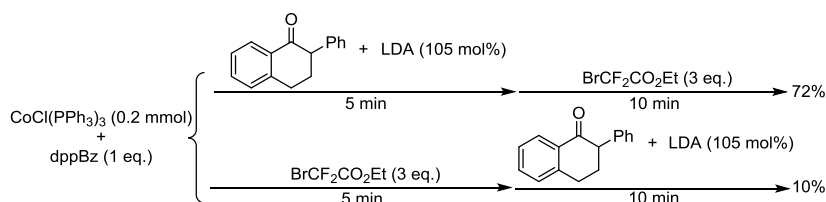



## Supplementary References:

- (1) Rao, B., Tang, J. & Zeng, X. Synthesis of 2-Benzylphenyl Ketones by Aryne Insertion into Unactivated C–C Bonds. *Org. Letter.* **18**, 1678-1681 (2016).
- (2) Zhang, Y.-M., Li, M., Li, W., Huang, Z., Zhu, S., Yang, B., Wang, X.-C. & Zhang, S. X.-A. A new class of “electro-acid/base”-induced reversible methyl ketone colour switches. *J. Mater. Chem. C.* **1**, 5309-5314 (2013).
- (3) Li, Z. & Gevorgyan, V. Double Duty for Cyanogen Bromide in a Cascade Synthesis of Cyanoepoxides. *Angew. Chem. Int. Ed.* **50**, 2808-2810 (2011).
- (4) Campbell, N. & Ciganek, E. A new synthesis of 3-hydroxy-1 : 2-benzofluorene. *J. Chem. Soc.* **0**, 3834-3836 (1956).
- (5) Takeda, T. & Terada, M. Synthesis of Bulky Aryl Group-substituted Chiral Bis(guanidino)iminophosphoranes as Uncharged Chiral Organosuperbase Catalysts. *Aust. J. Chem.* **67**, 1124-1128 (2014).
- (6) Hino, K., Nagai, Y., Uno, H., Masuda, Y., Oka, M. & Karasawa, T. A novel class of potential central nervous system agents. 3-Phenyl-2-(1-piperazinyl)-5H-1-benzazepines. *J. Med. Chem.* **31**, 107-117 (1988).
- (7) Takeda, T. & Terada, M. Development of a Chiral Bis(guanidino)iminophosphorane as an Uncharged Organosuperbase for the Enantioselective Amination of Ketones. *J. Am. Chem. Soc.* **135**, 15306-15309 (2013).
- (8) Dolbier Jr, W. R., Burkholder, C. R. & Mèdebielle, M. Syntheses of 2-(bromodifluoromethyl)benzoxazole and 5-(bromodifluoromethyl)-1,2,4-oxadiazoles. *J. Fluorine Chem.* **95**, 127-130 (1999).
- (9) Maximilian, D. *et al.* *PCT Int. Appl.*, 2013092850, 27 Jun 2013.
- (10) Prakash, G. K. S., Hu, J., Simon, J., Bellew, D. R. & Olah, G. A. Preparation of  $\alpha,\alpha$ -difluoroalkanesulfonic acids. *J. Fluorine Chem.* **125**, 595-601 (2004).
- (11) Tarui, A., Shinohara, S., Sato, K., Omote, M. & Ando, A. Nickel-Catalyzed Negishi Cross-Coupling of Bromodifluoroacetamides. *Org. Letter.* **18**, 1128-1131 (2016).
- (12) Li, Y., Liu, J., Zhao, S., Du, X., Guo, M., Zhao, W., Tang, X. & Wang, G. Copper-Catalyzed Fluoroolefination of Silyl Enol Ethers and Ketones toward the Synthesis of  $\beta$ -Fluoroenones. *Org. Lett.* **20**, 917–920 (2018).
